# Supplementary material for: Bifurcated synthesis of methylene-lactone- and methylene-lactam-fused spirolactams via electrophilic amide allylation of γ-phenylthio-functionalized γ-lactams
Source: publisher site journal article supplement (doi:10.3762/bjoc.16.227), 2020-11-13
Supplement: Additional file 2 [file 1860-5397-16-227-S2.pdf]

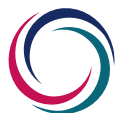

## Supporting Information

for

### **Bifurcated synthesis of methylene-lactone- and methylene-lactam-fused spirolactams via electrophilic amide allylation of $\gamma$ -phenylthio-functionalized $\gamma$ -lactams**

Tetsuya Sengoku, Koki Makino, Ayumi Iijima, Toshiyasu Inuzuka and Hidemi Yoda

*Beilstein J. Org. Chem.* **2020**, *16*, 2769–2775. [doi:10.3762/bjoc.16.227](https://doi.org/10.3762/bjoc.16.227)

**Copies of  $^1\text{H}$  and  $^{13}\text{C}$  NMR spectra of all new compounds**

**The following data are included in this material:**

Copies of  $^1\text{H}$  and  $^{13}\text{C}$  NMR spectra

S2–S141

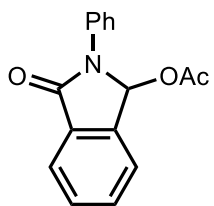

**2a**

(<sup>1</sup>H NMR, 300 MHz, CDCl<sub>3</sub>)

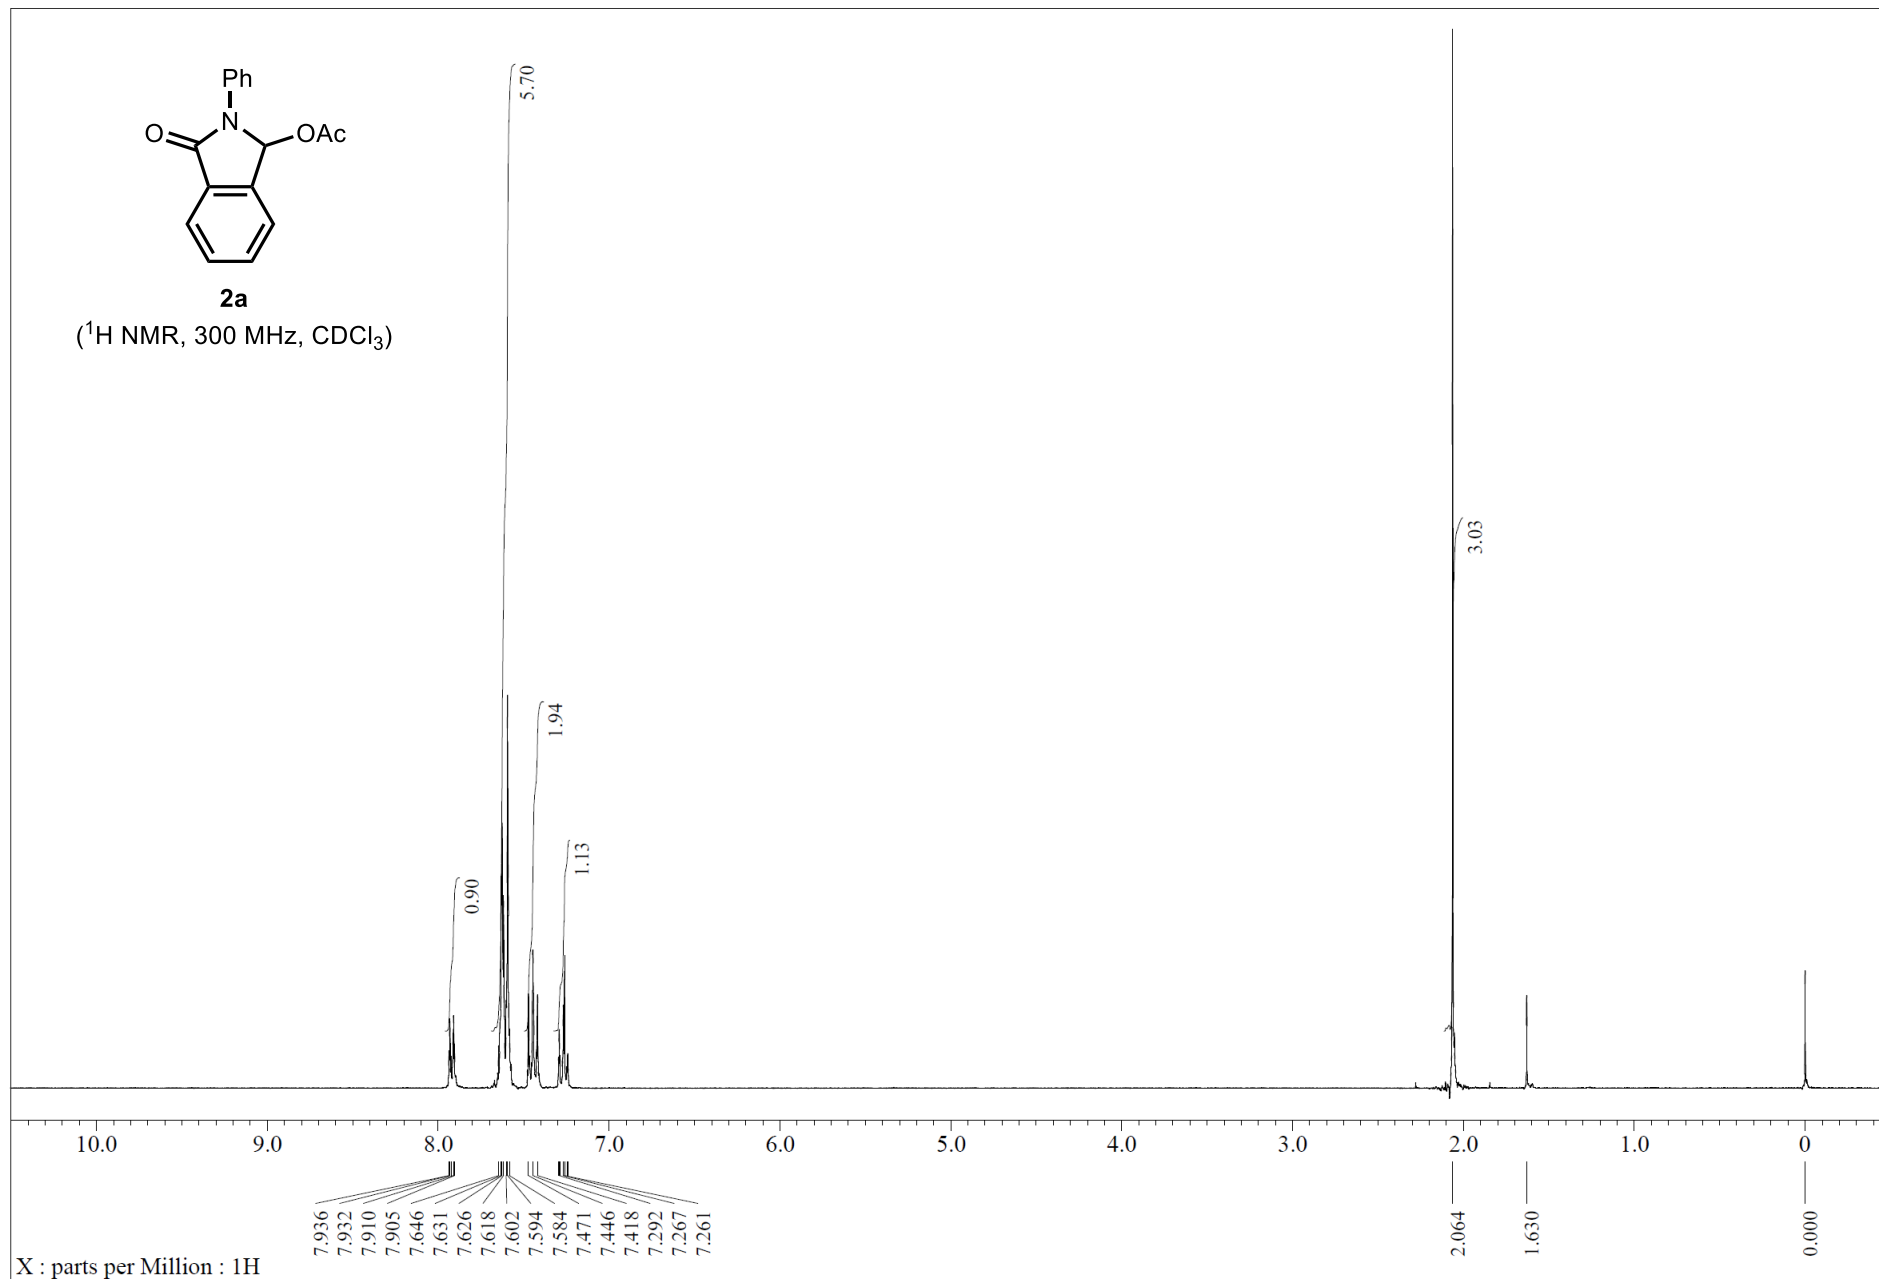

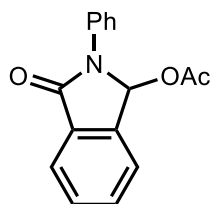

**2a**

( $^{13}\text{C}$  NMR, 75 MHz,  $\text{CDCl}_3$ )

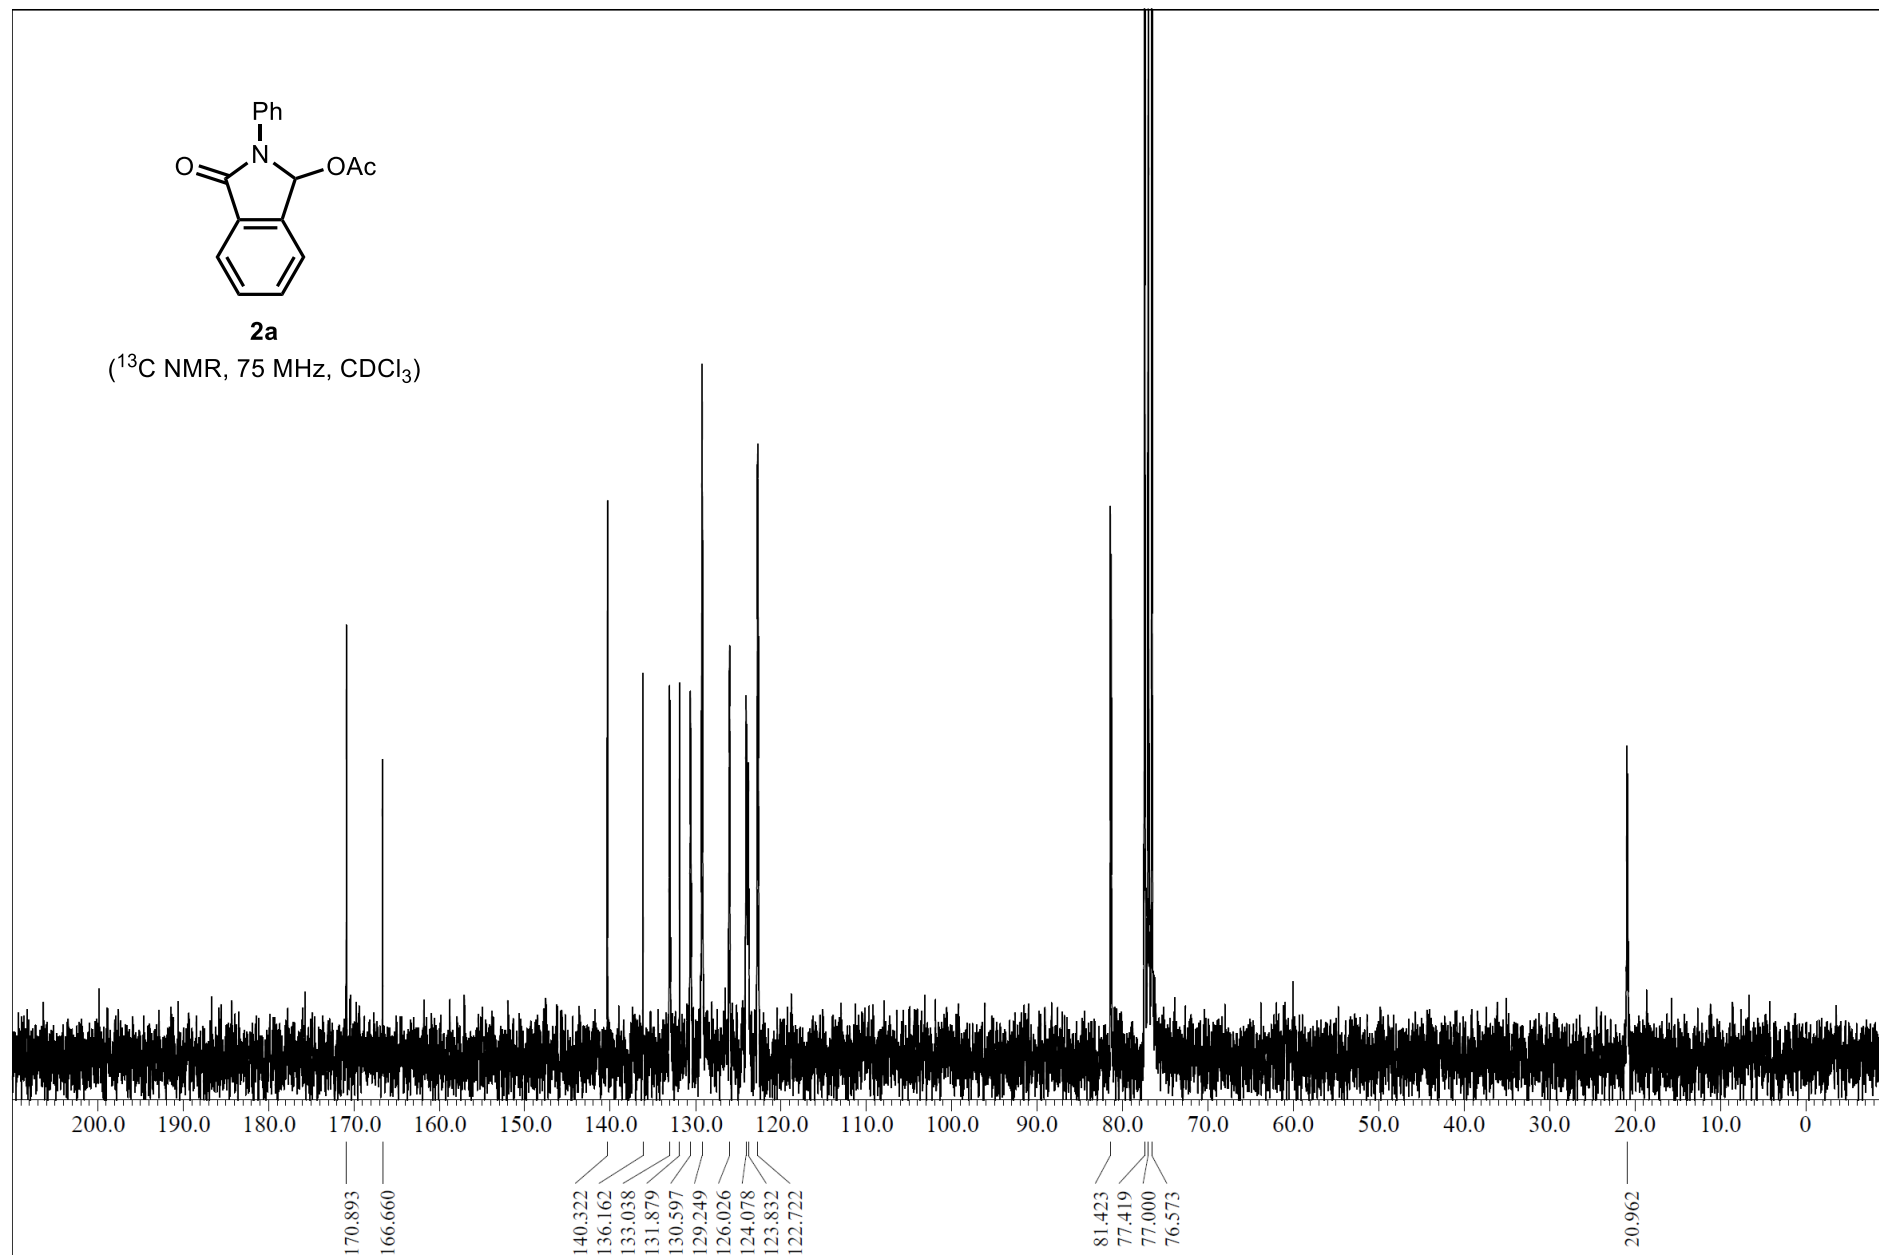

X : parts per Million :  $^{13}\text{C}$



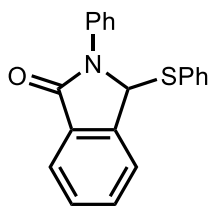

**2b**

(<sup>1</sup>H NMR, 300 MHz, CDCl<sub>3</sub>)

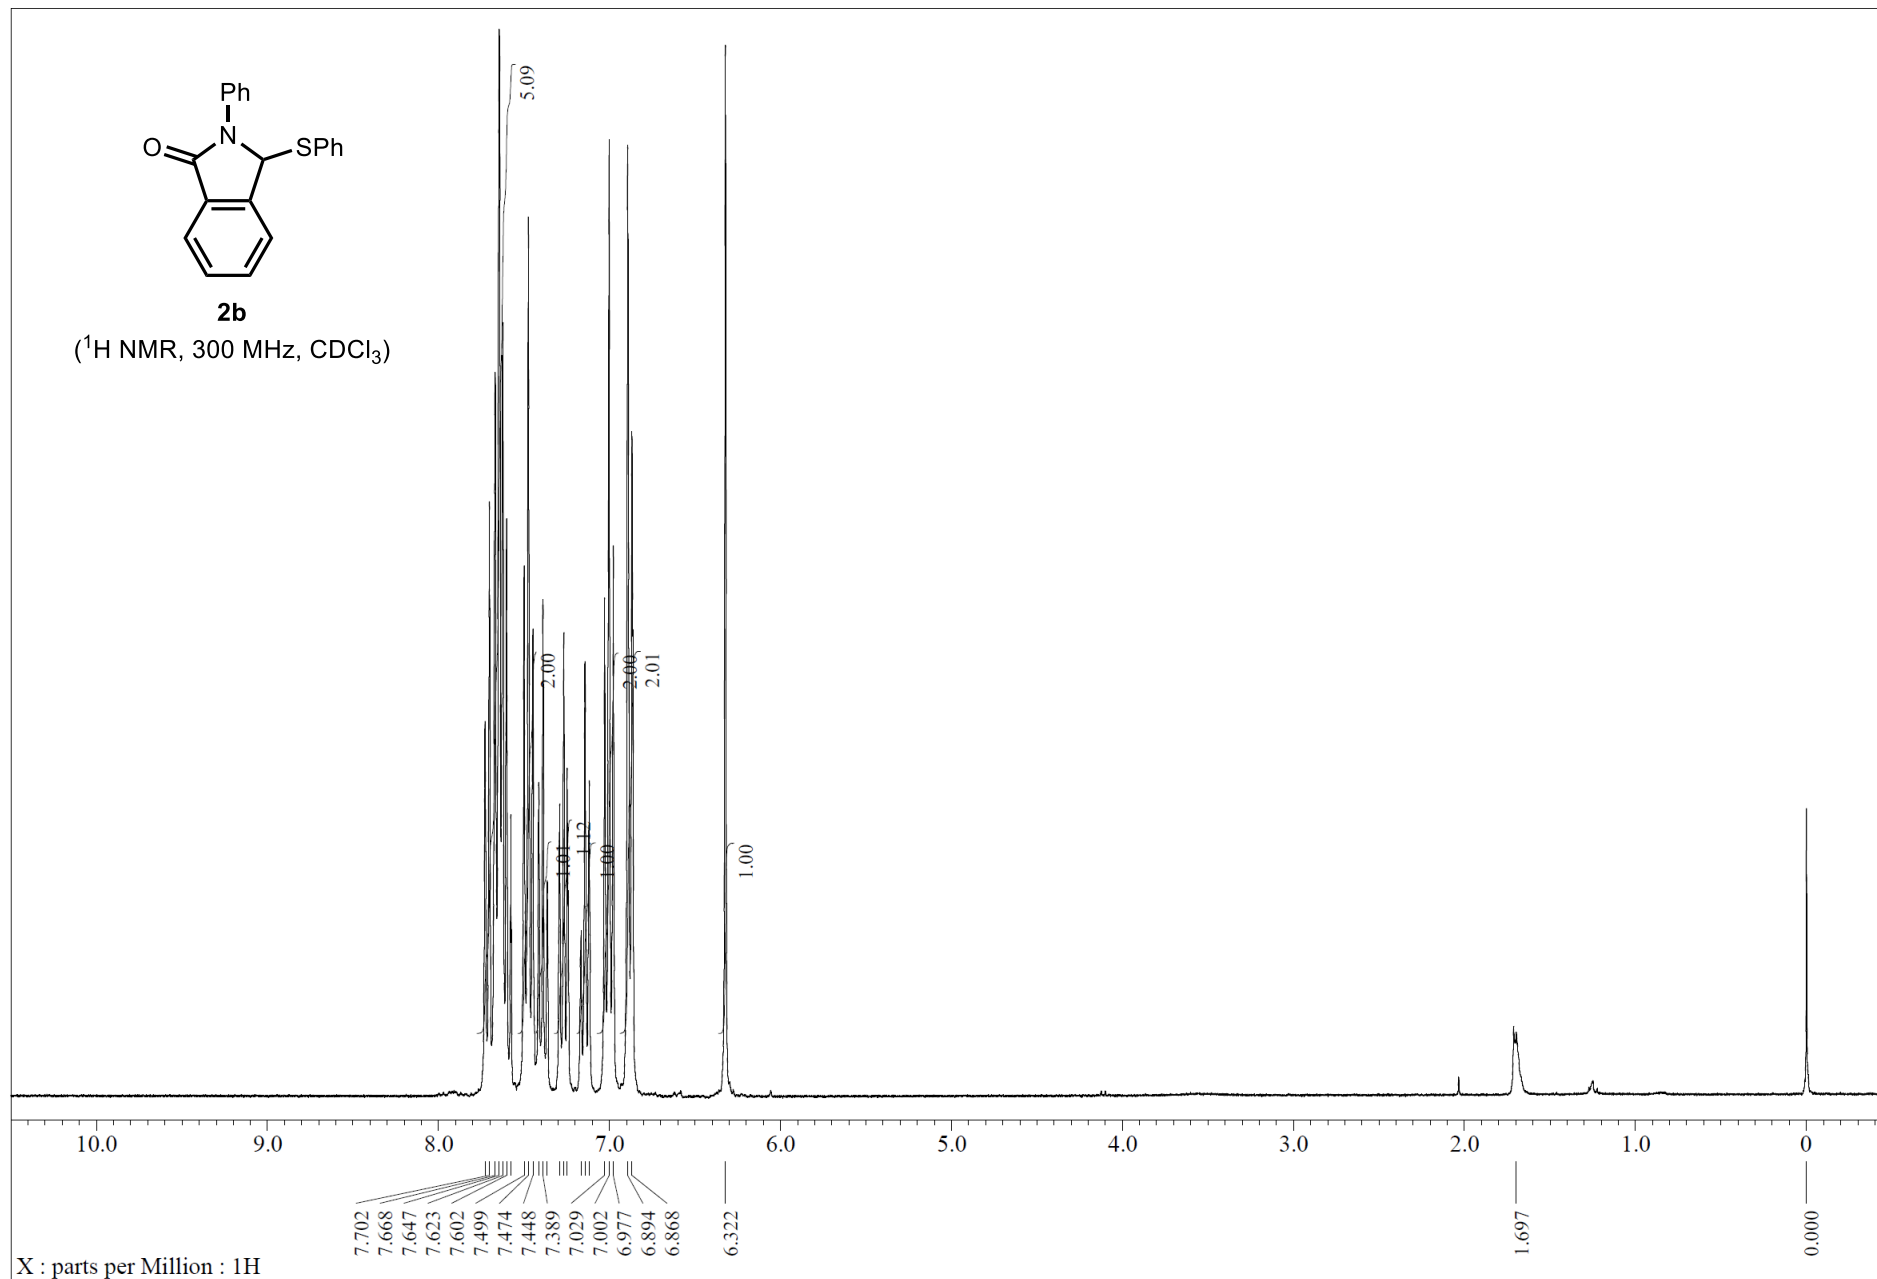

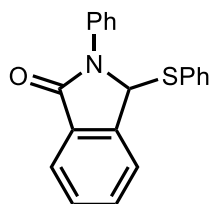

**2b**

(<sup>13</sup>C NMR, 75 MHz, CDCl<sub>3</sub>)

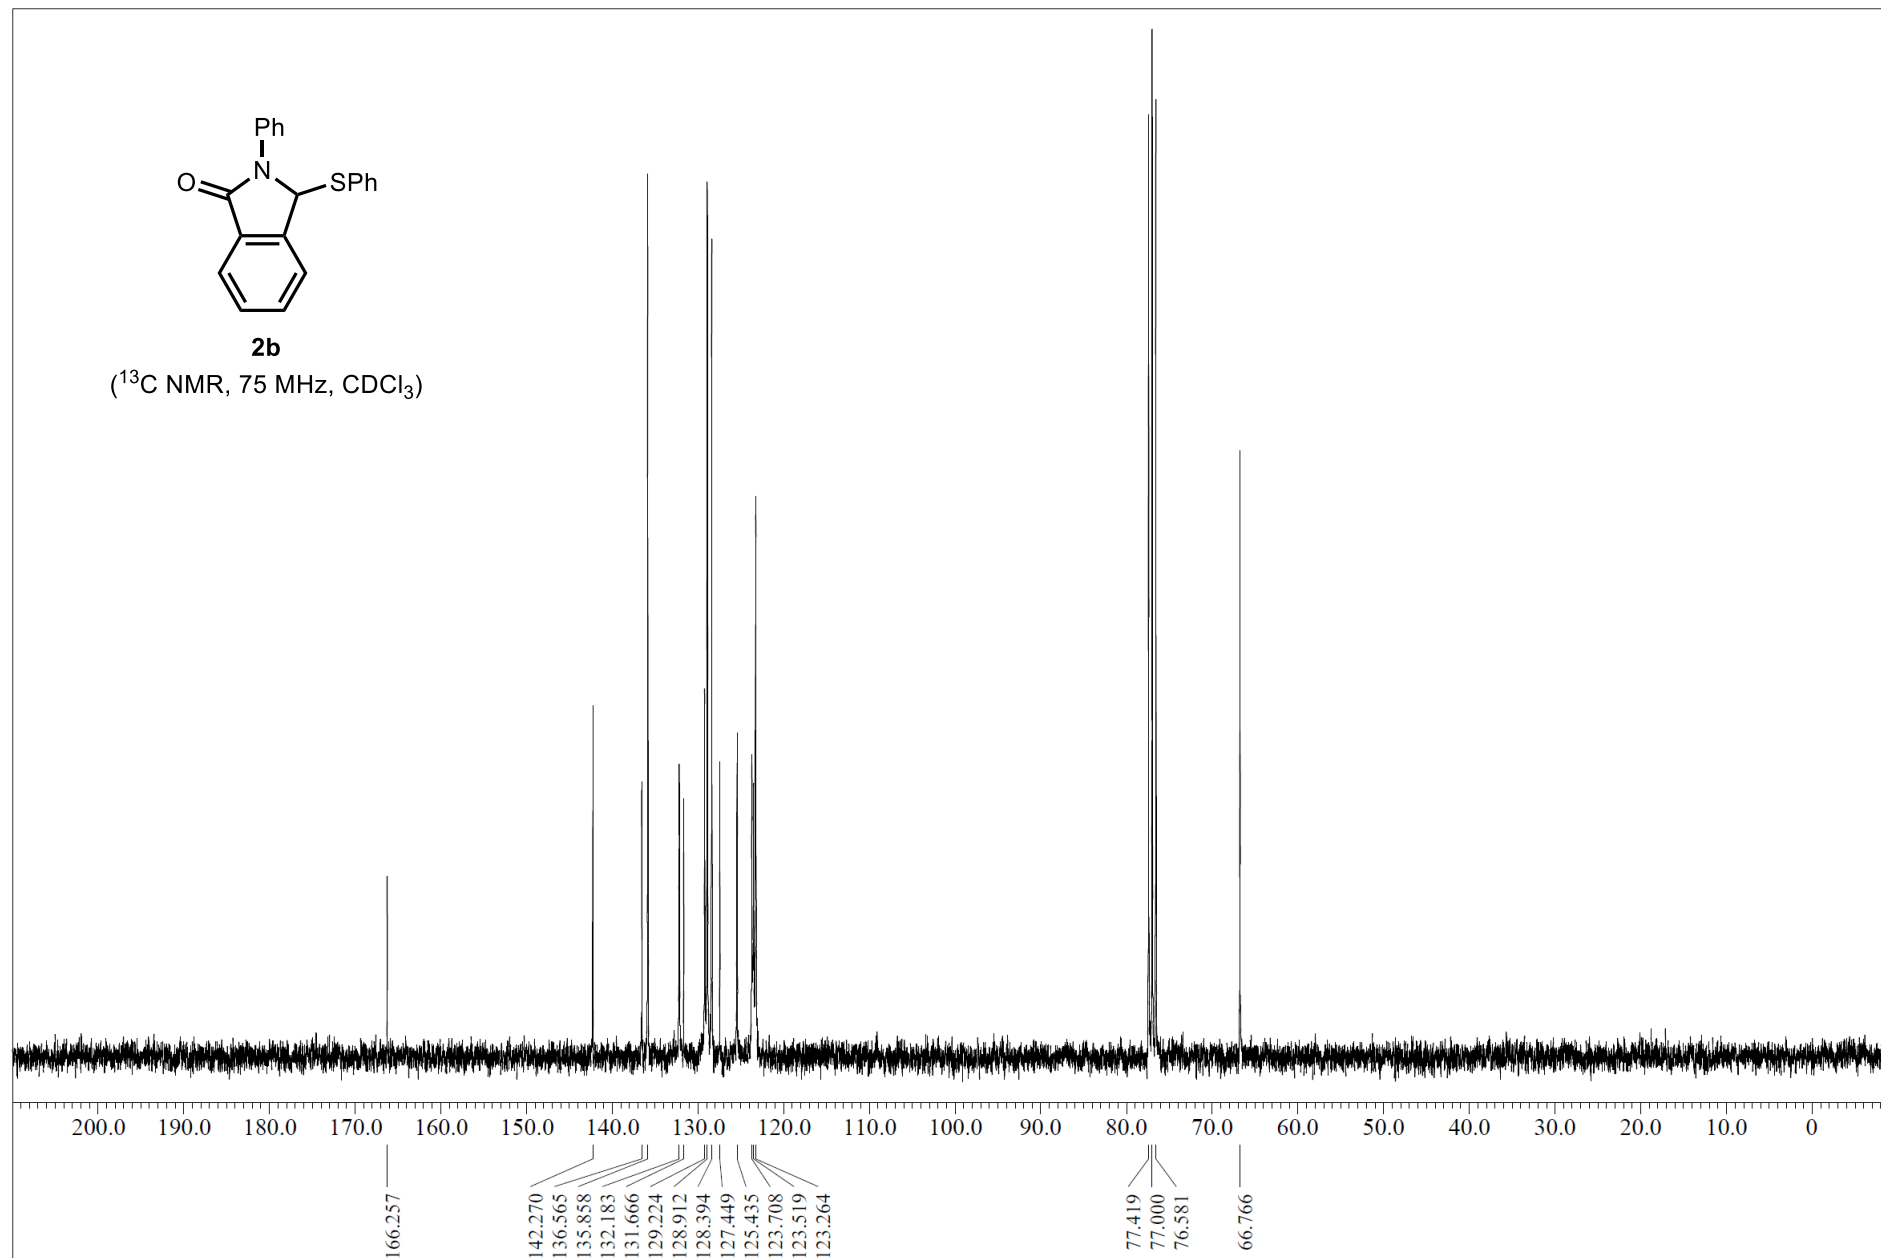

X : parts per Million : 13C

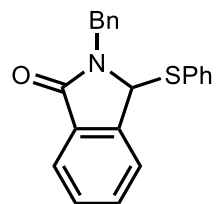

**2c**

(<sup>1</sup>H NMR, 300 MHz, CDCl<sub>3</sub>)

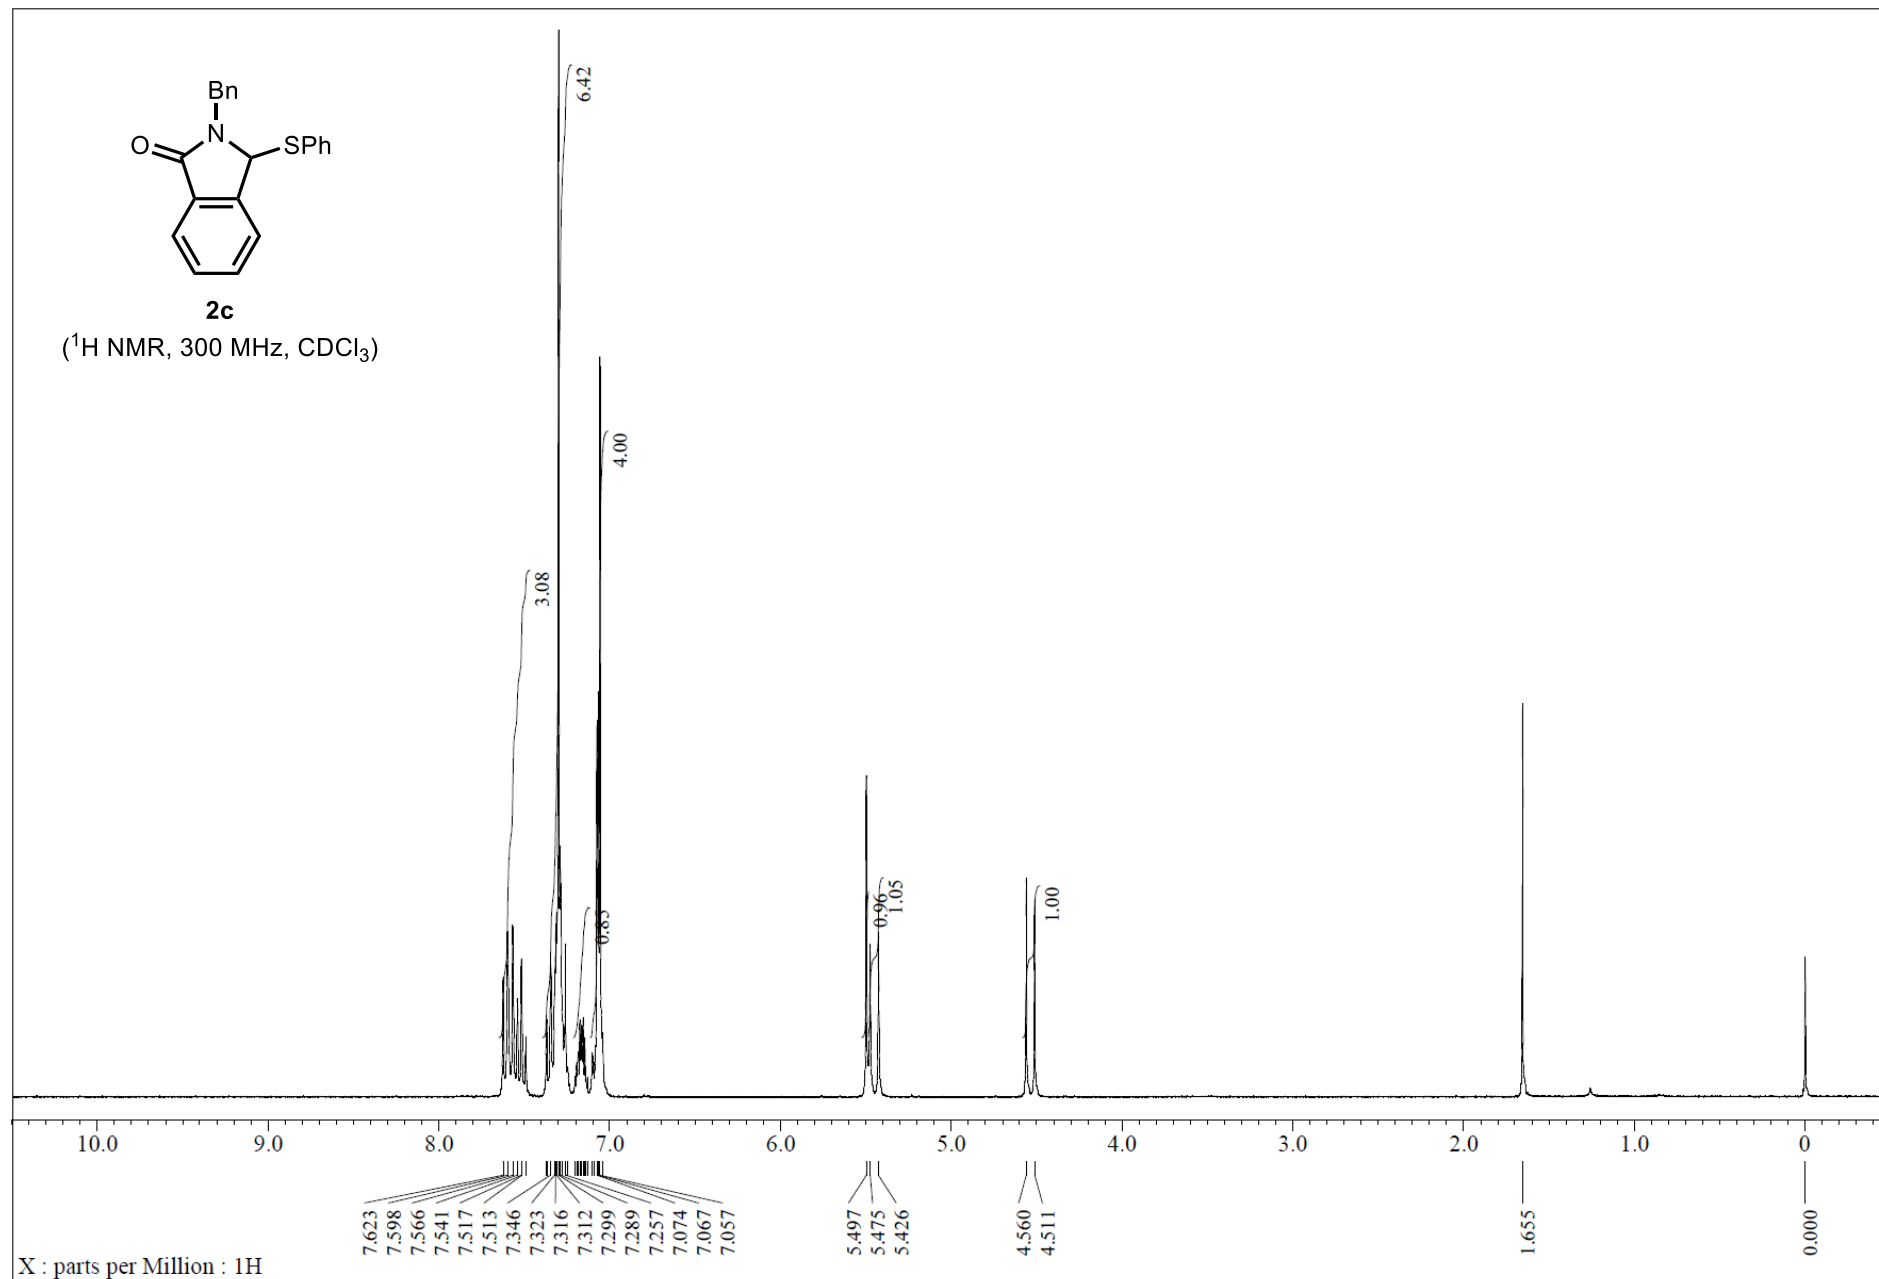

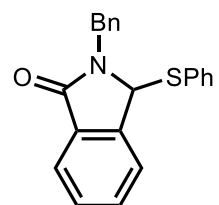

**2c**

( $^{13}\text{C}$  NMR, 75 MHz,  $\text{CDCl}_3$ )

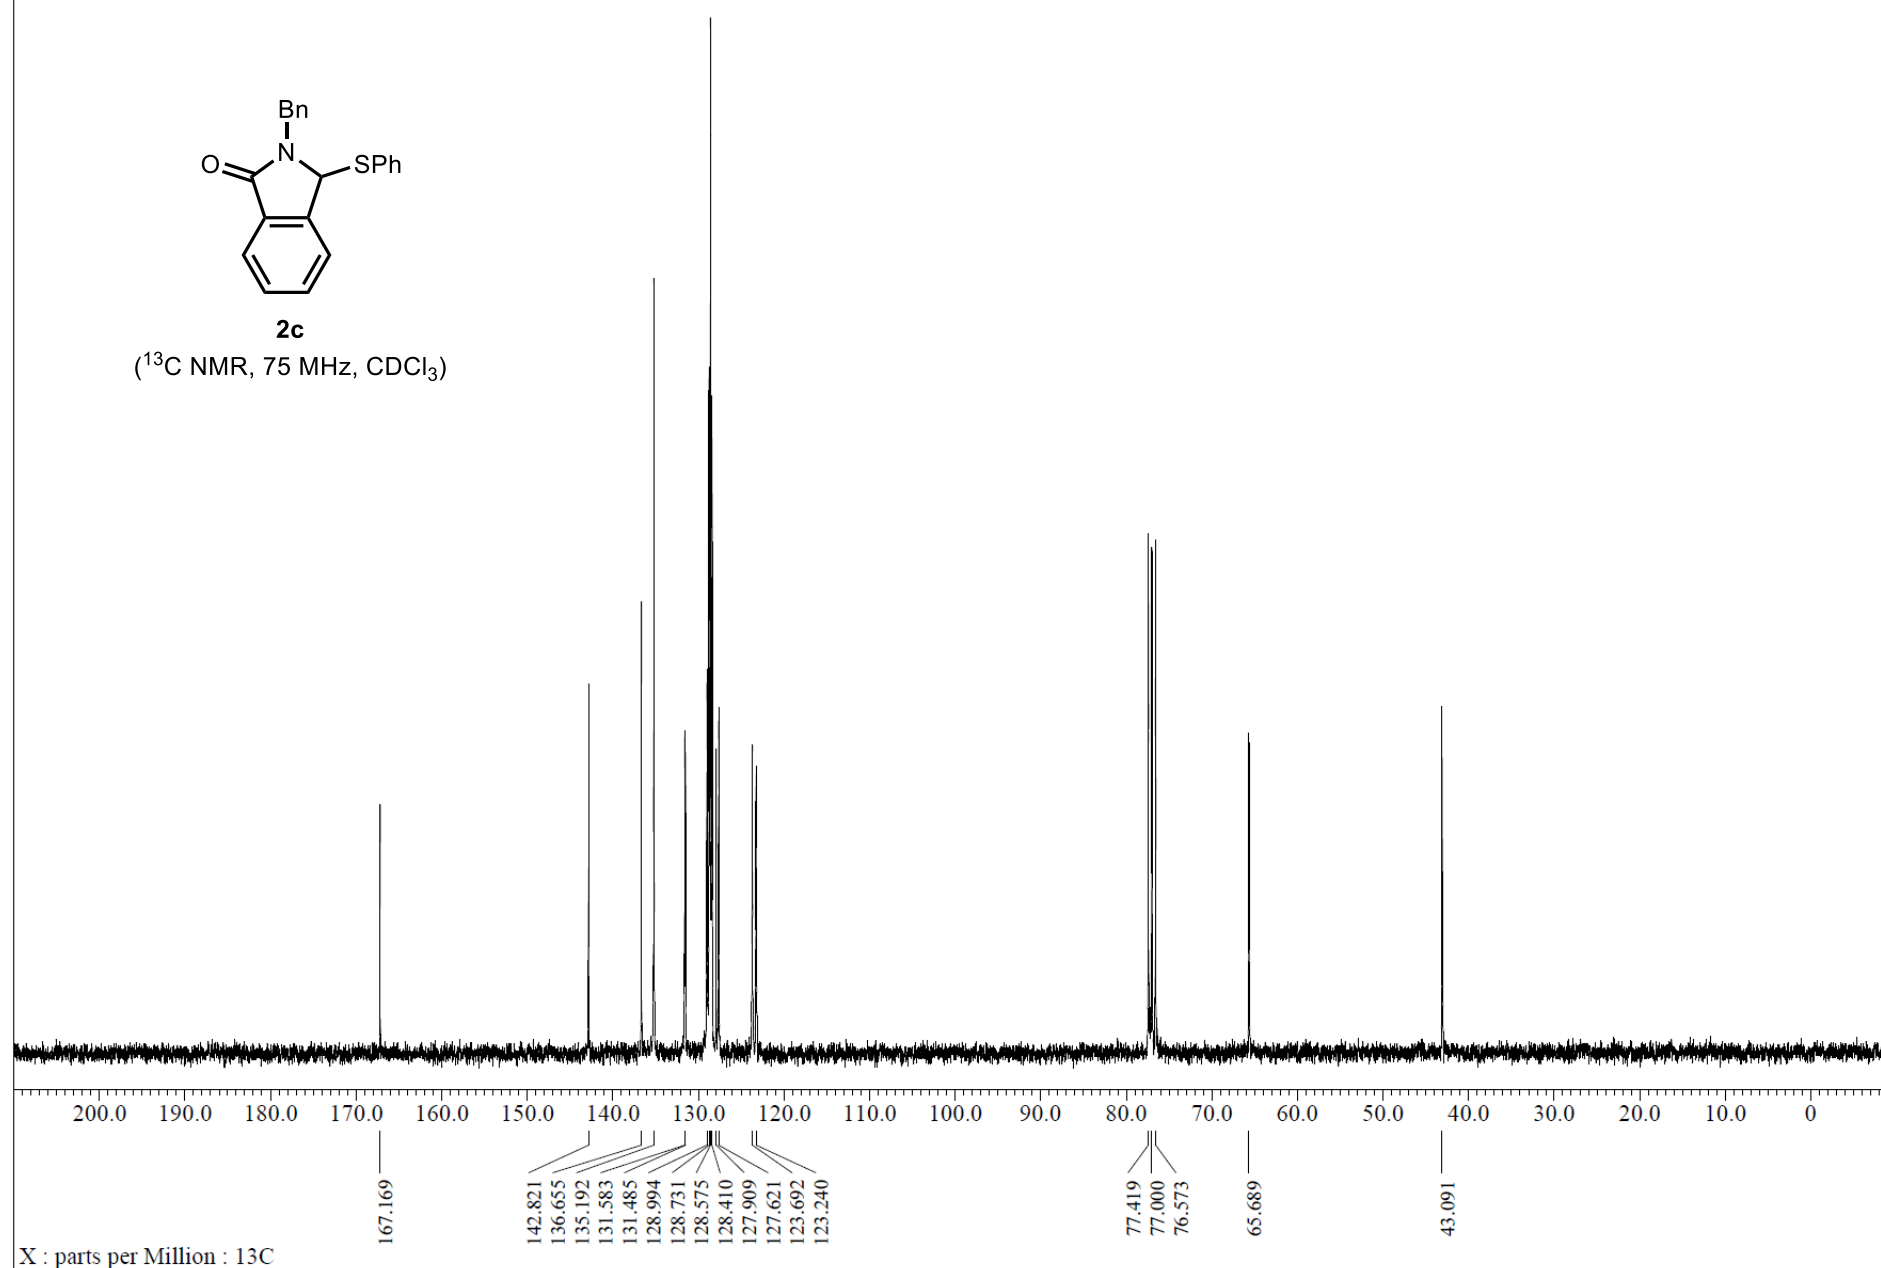

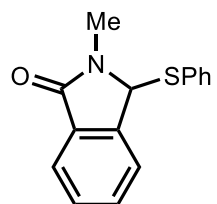

**2d**

(<sup>1</sup>H NMR, 300 MHz, CDCl<sub>3</sub>)

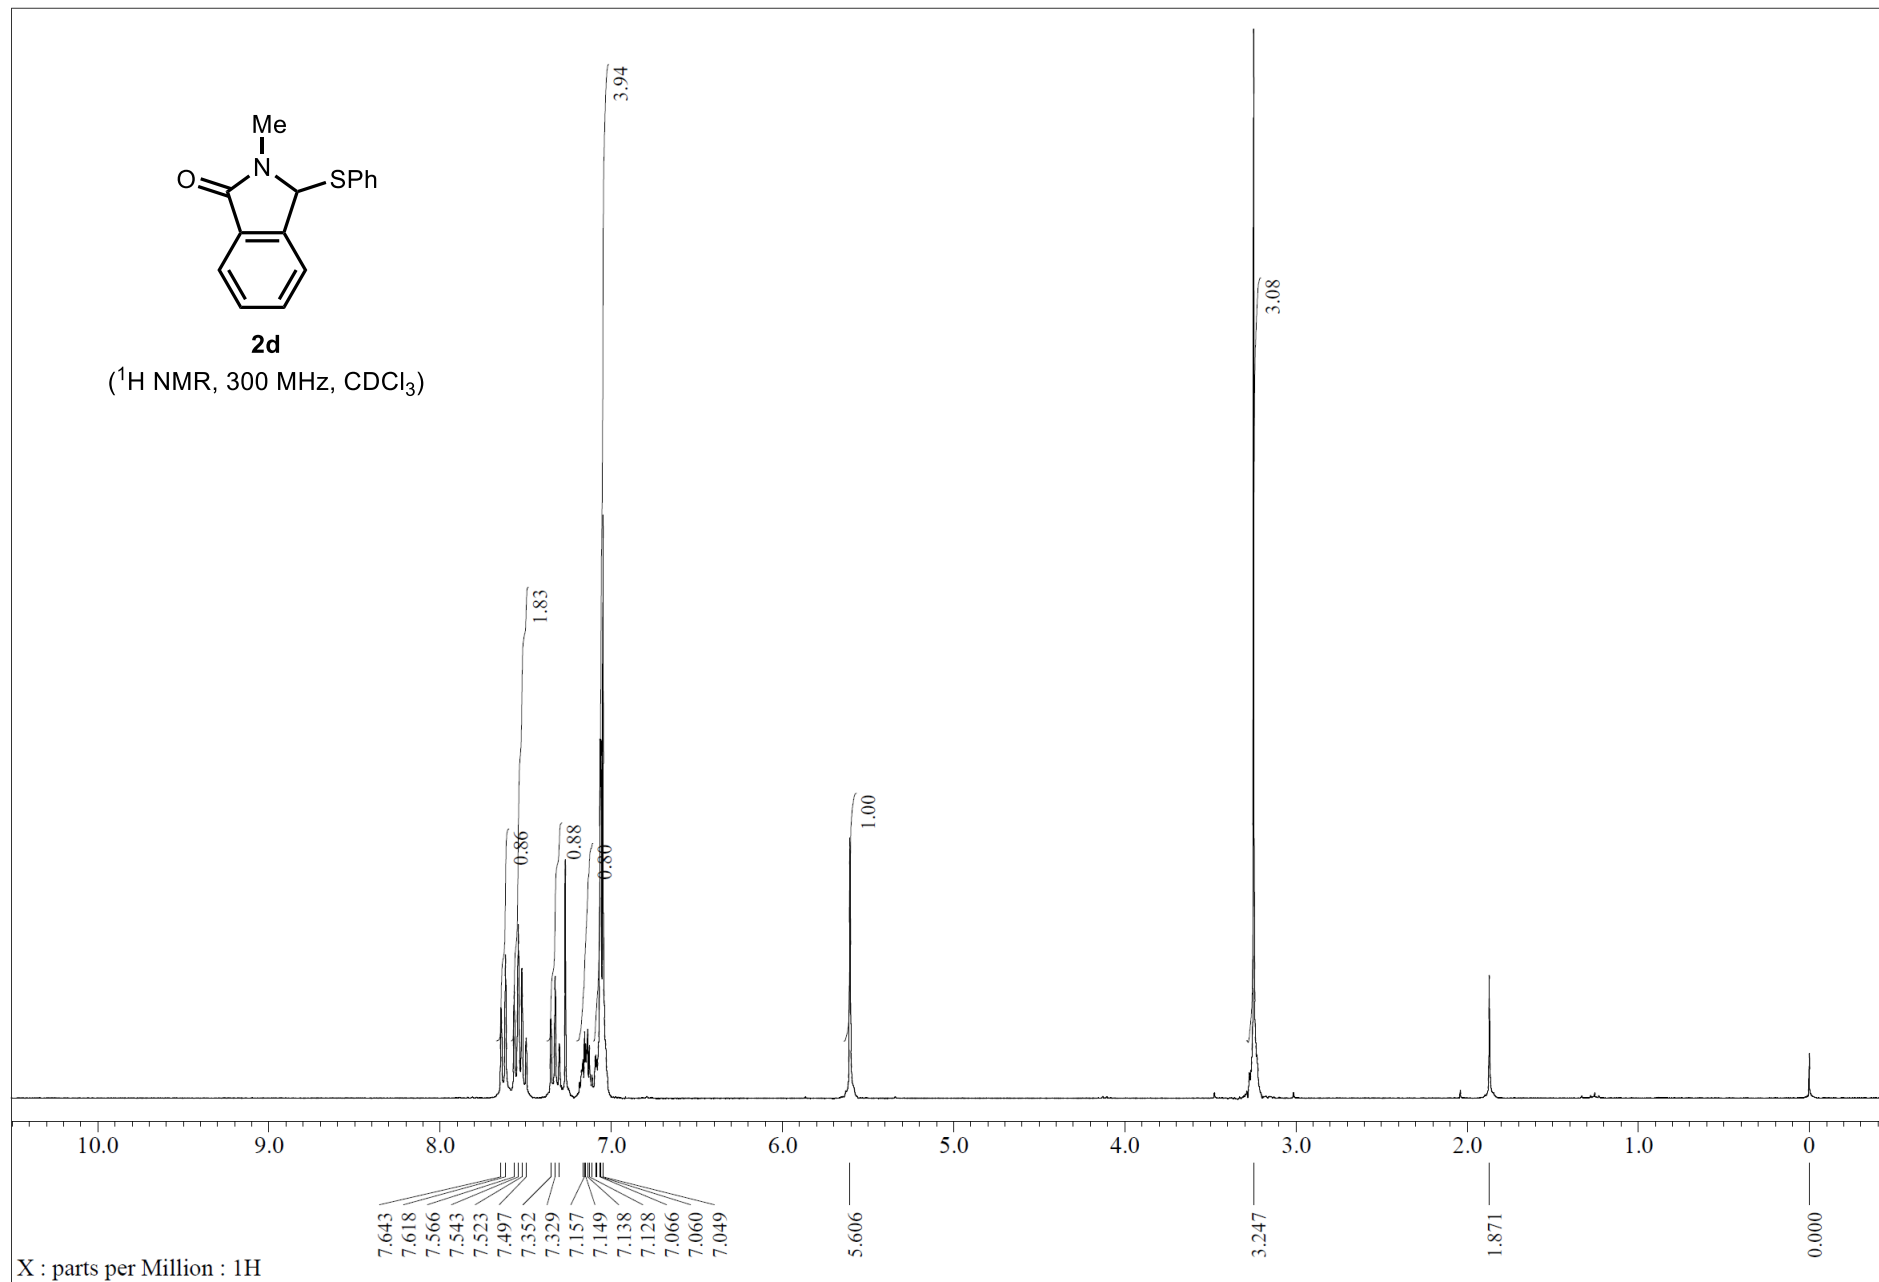

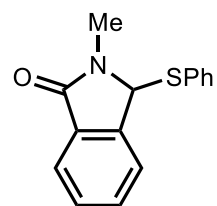

**2d**

(<sup>13</sup>C NMR, 75 MHz, CDCl<sub>3</sub>)

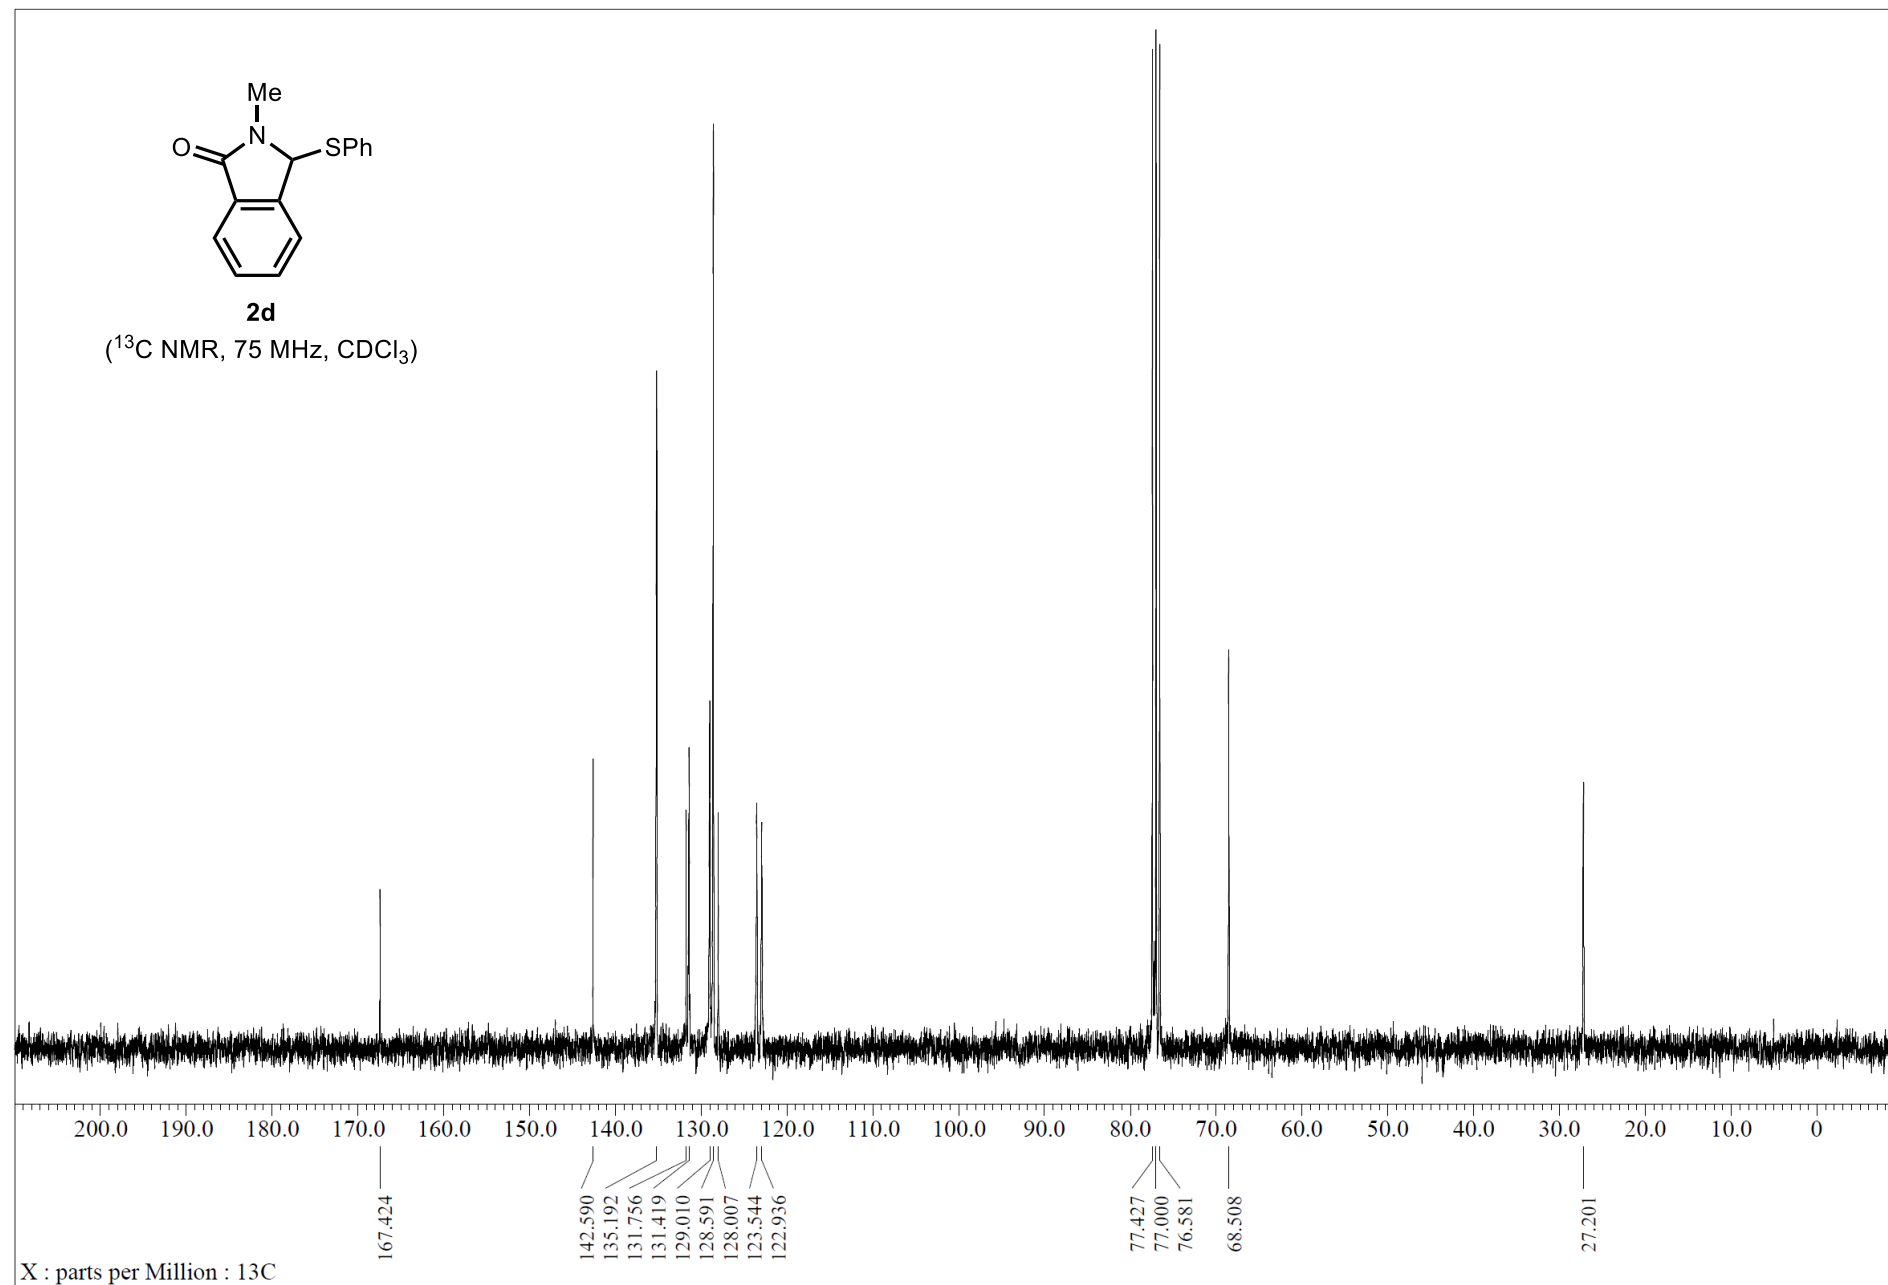

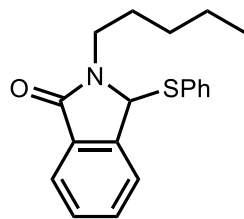

**2e**

(<sup>1</sup>H NMR, 300 MHz, CDCl<sub>3</sub>)

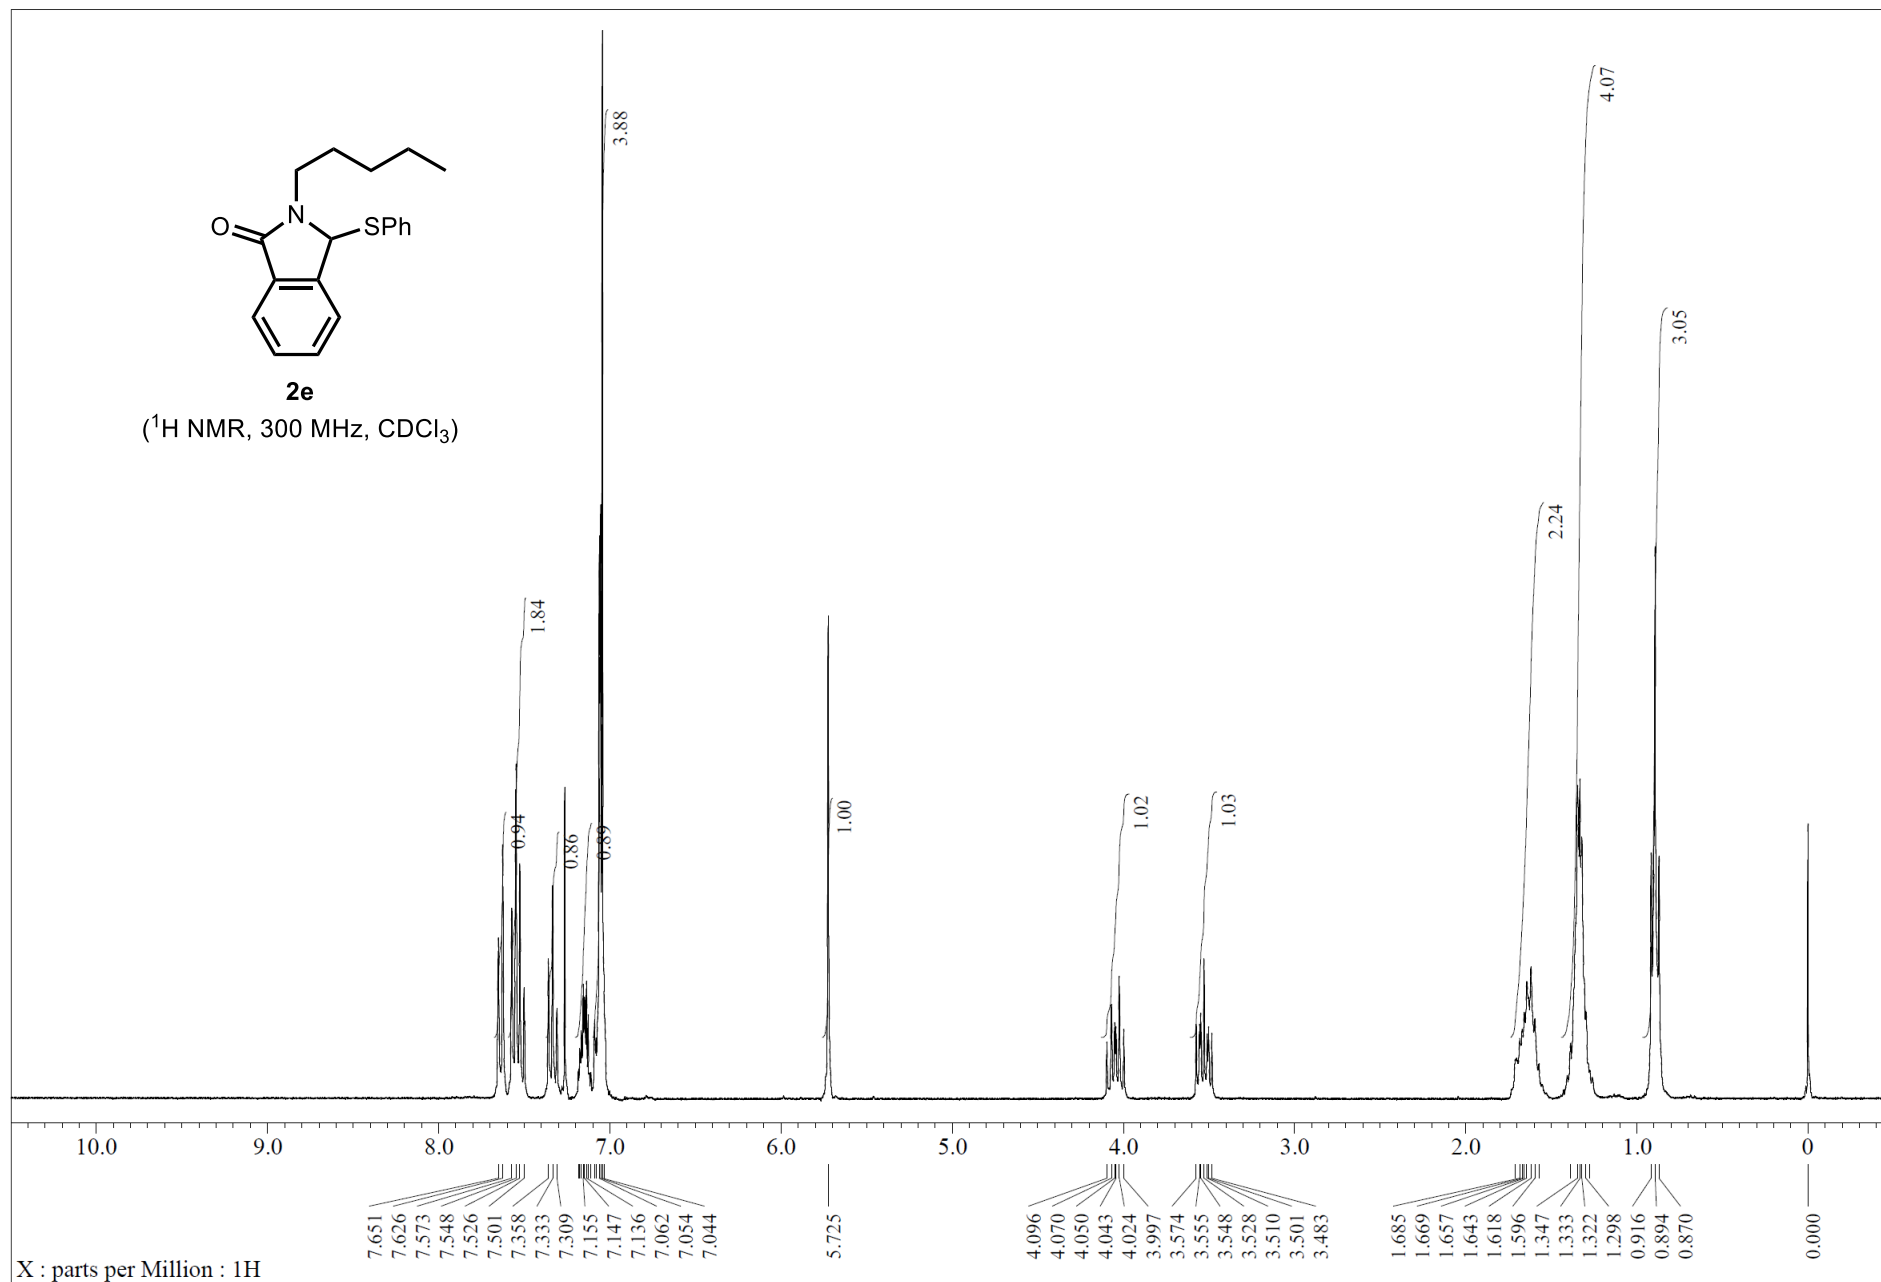

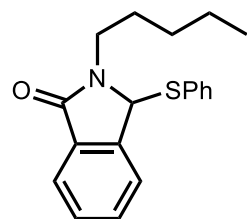

**2e**

(<sup>13</sup>C NMR, 75 MHz, CDCl<sub>3</sub>)

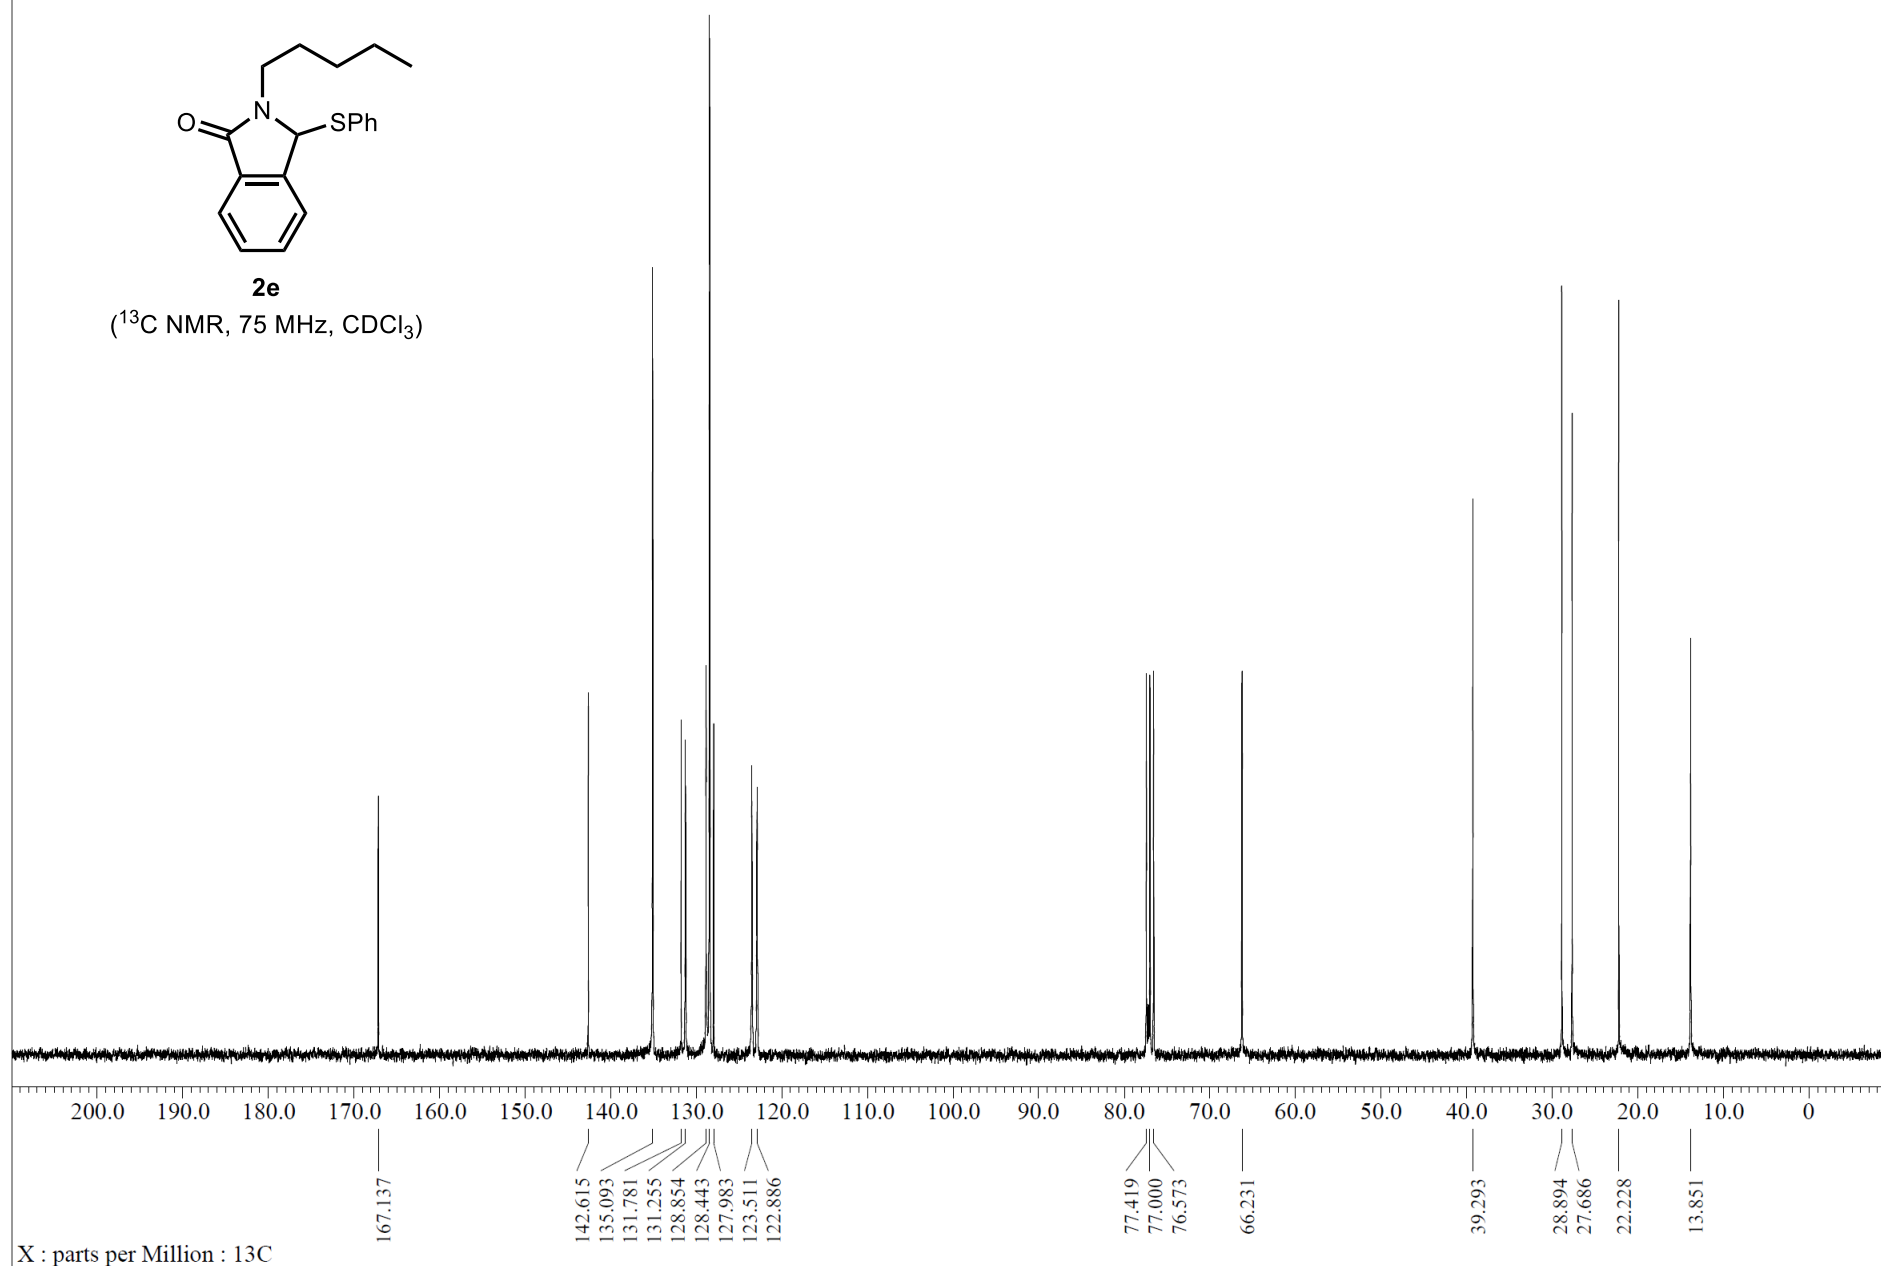

X : parts per Million : <sup>13</sup>C



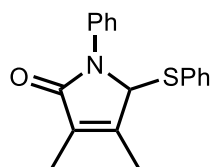

**2f**

(<sup>1</sup>H NMR, 300 MHz, CDCl<sub>3</sub>)

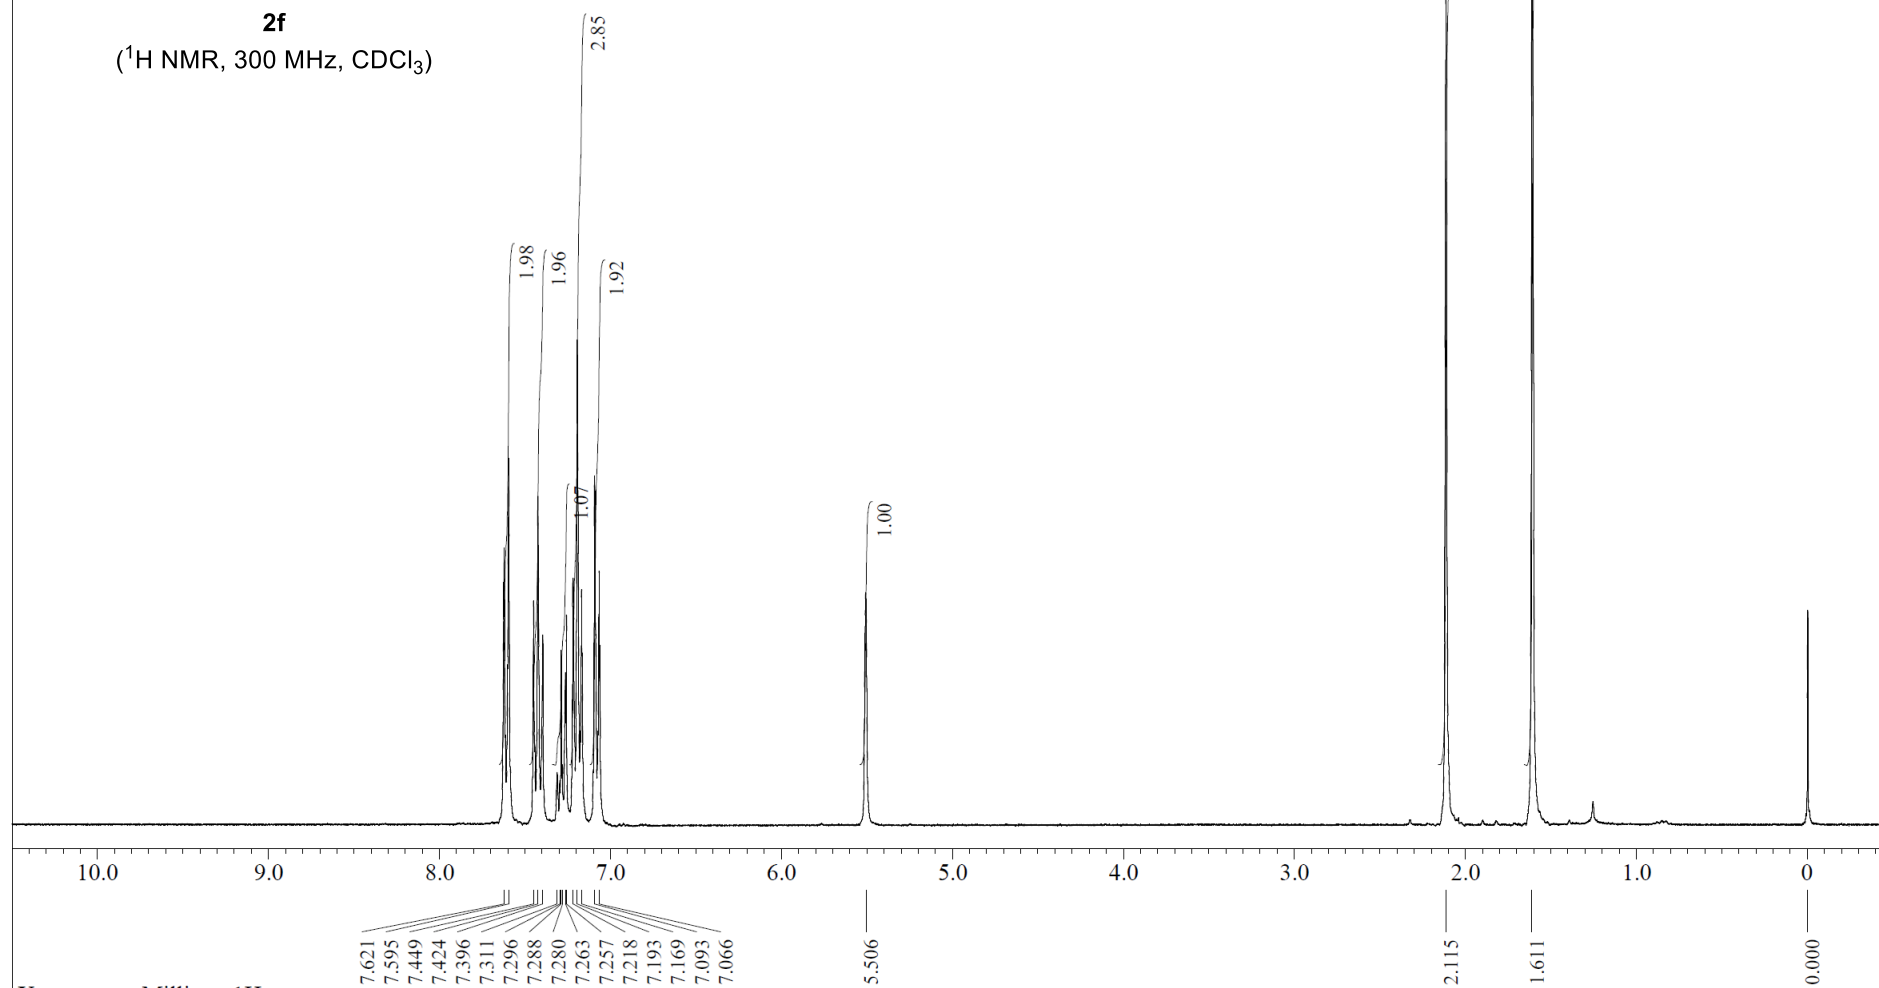

X : parts per Million : 1H

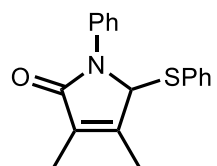

**2f**

( $^{13}\text{C}$  NMR, 75 MHz,  $\text{CDCl}_3$ )

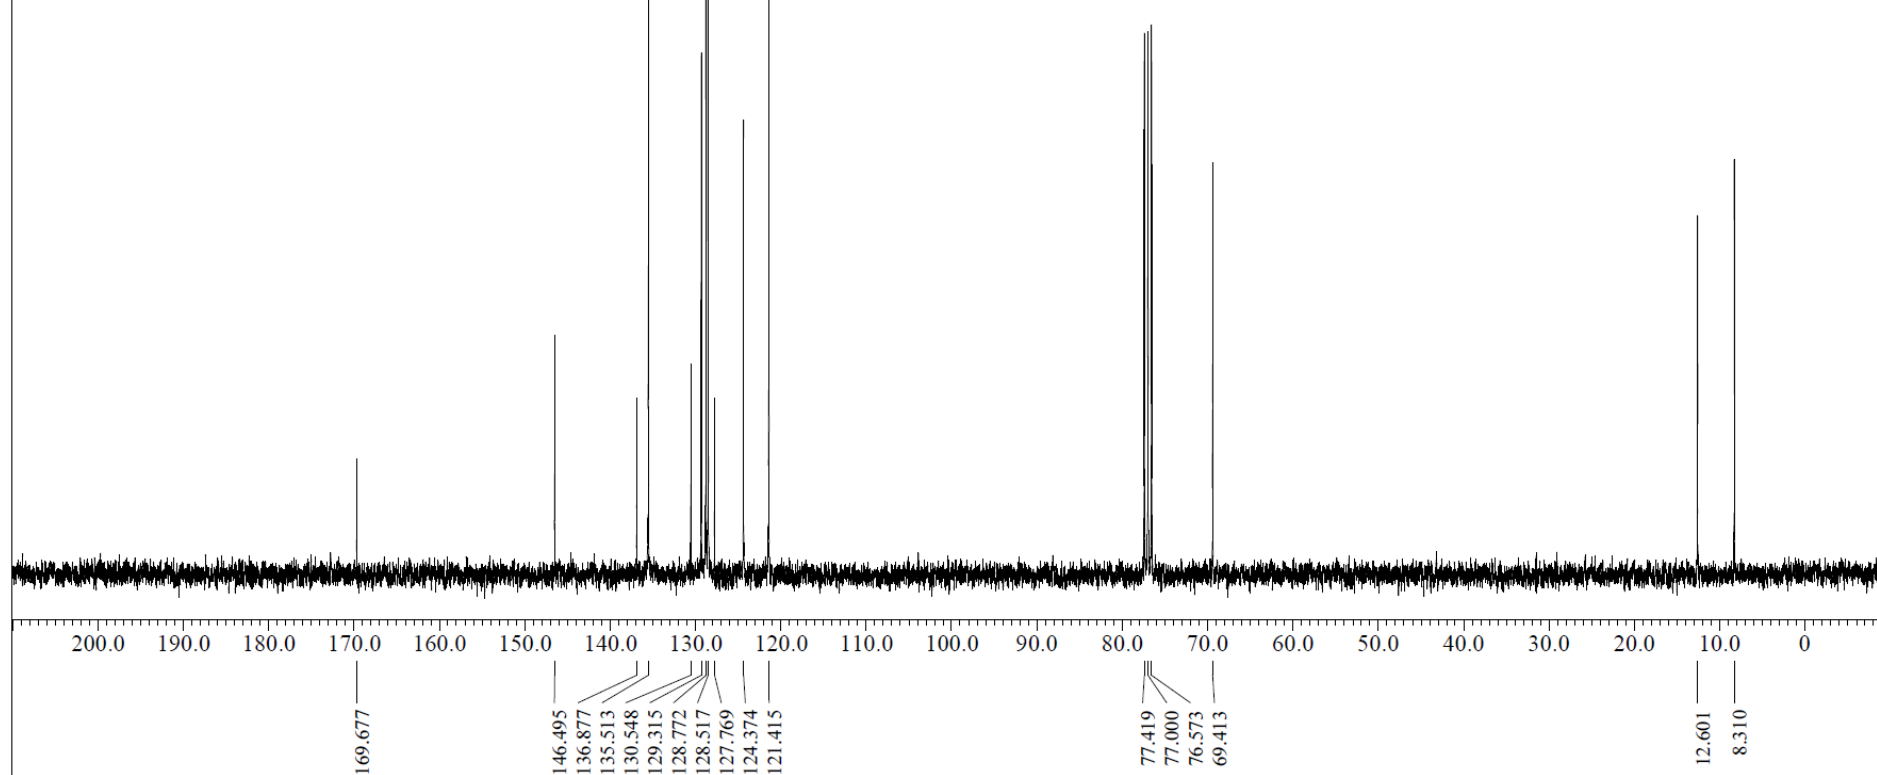

X : parts per Million :  $^{13}\text{C}$

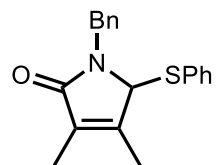

**2g**

(<sup>1</sup>H NMR, 300 MHz, CDCl<sub>3</sub>)

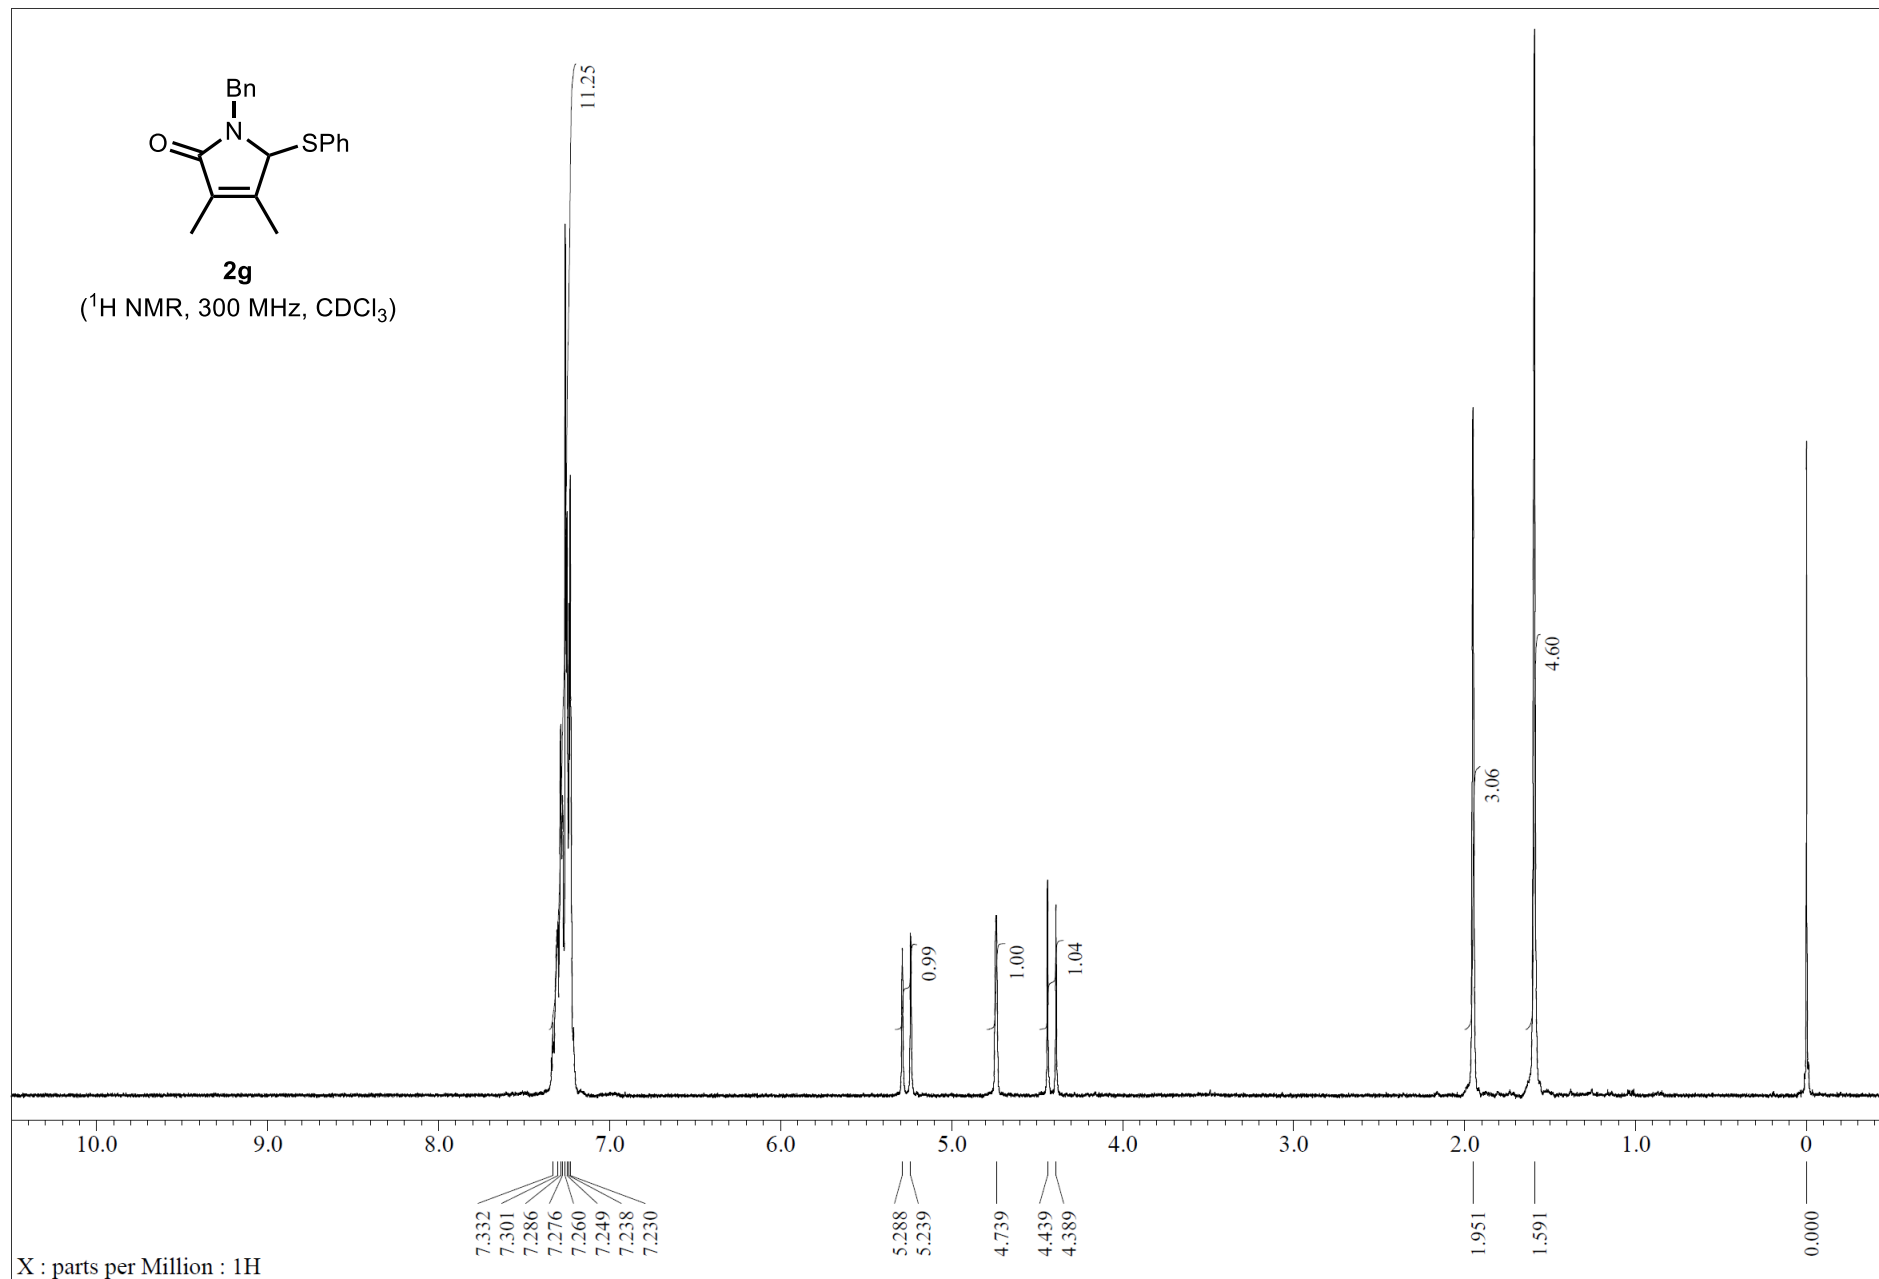

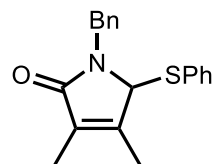

**2g**

(<sup>13</sup>C NMR, 75 MHz, CDCl<sub>3</sub>)

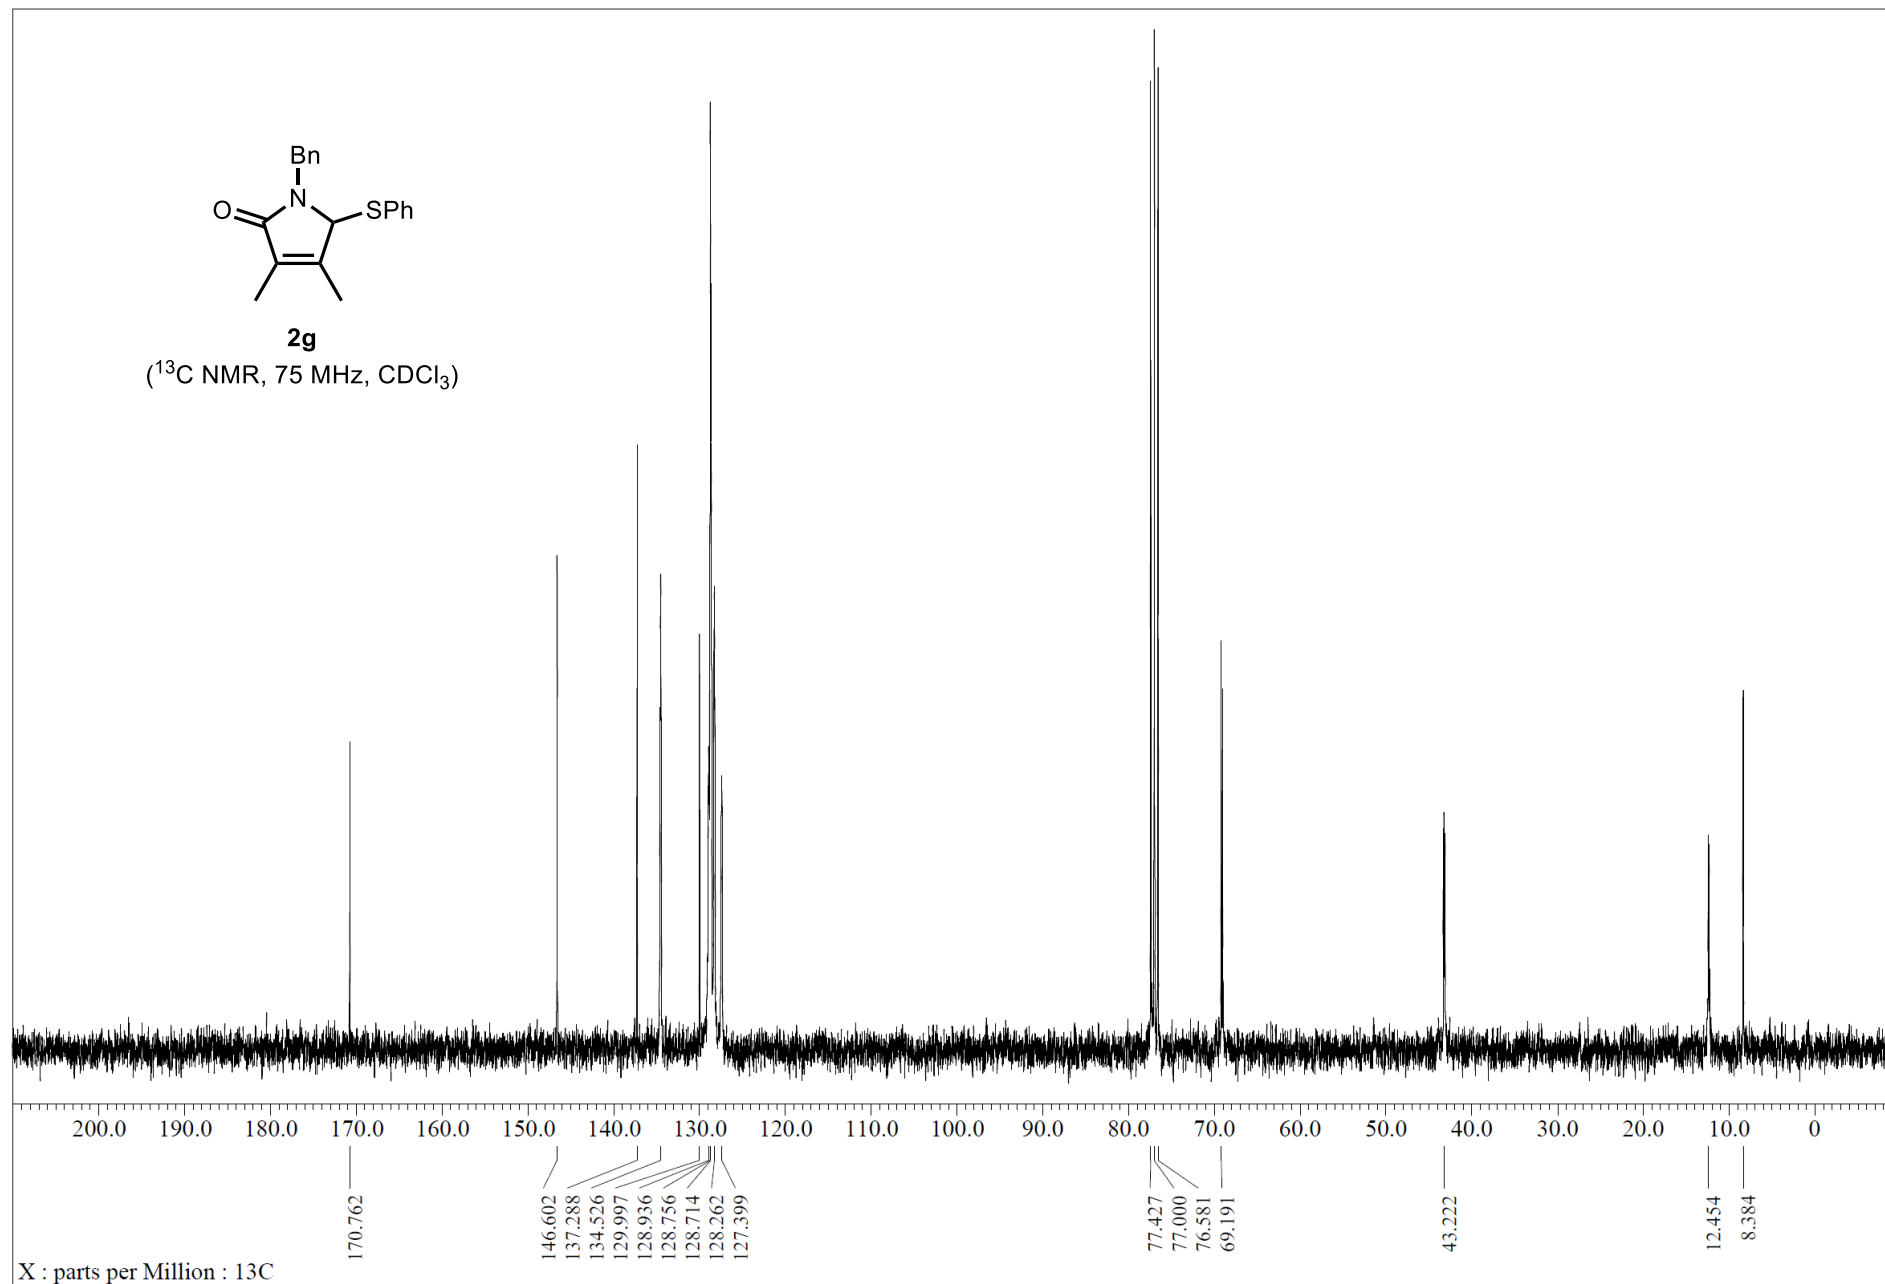

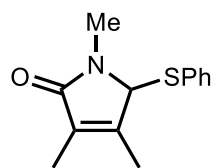

**2h**

(<sup>1</sup>H NMR, 300 MHz, CDCl<sub>3</sub>)

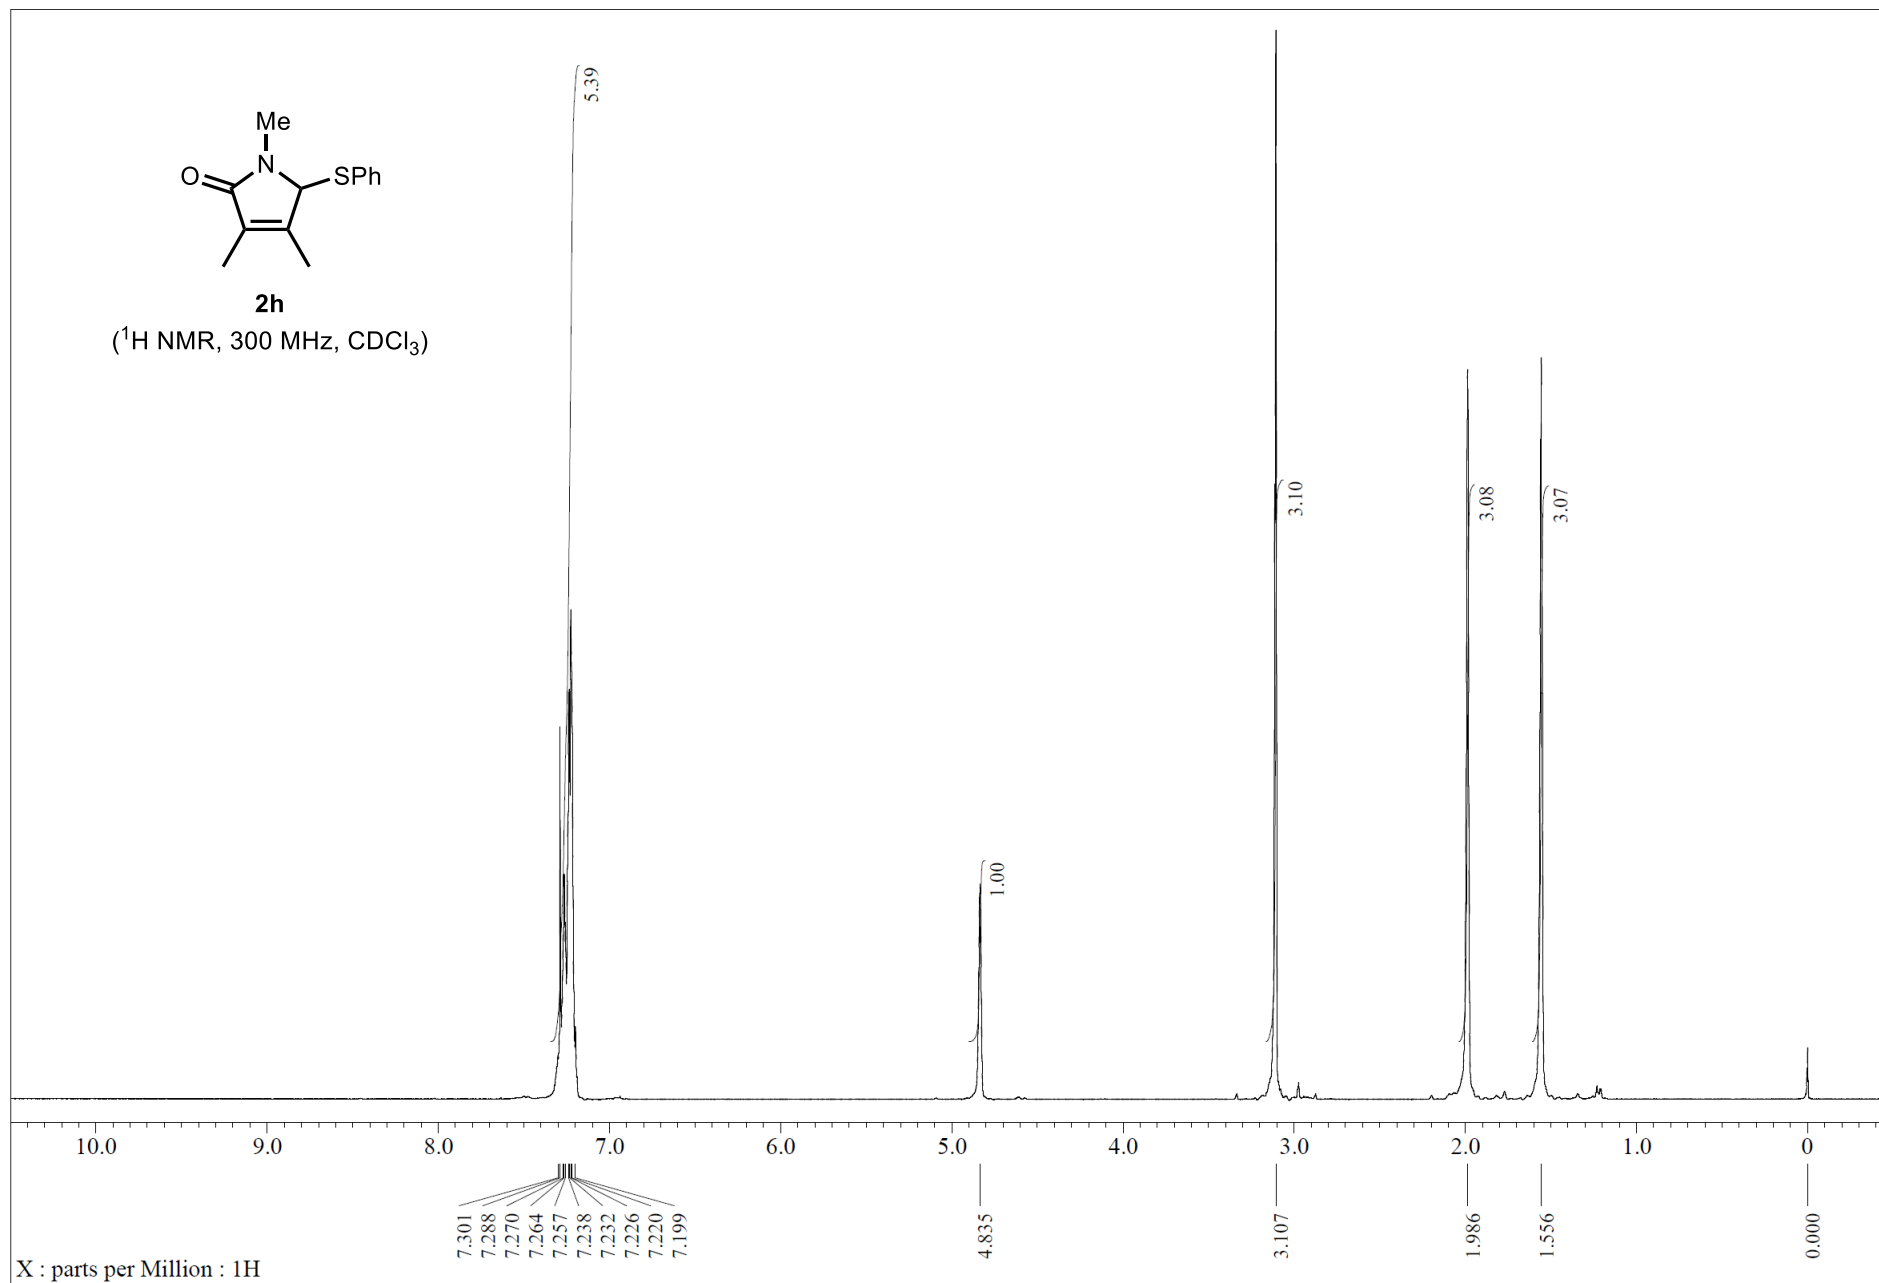

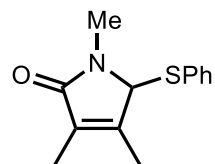

**2h**

(<sup>13</sup>C NMR, 75 MHz, CDCl<sub>3</sub>)

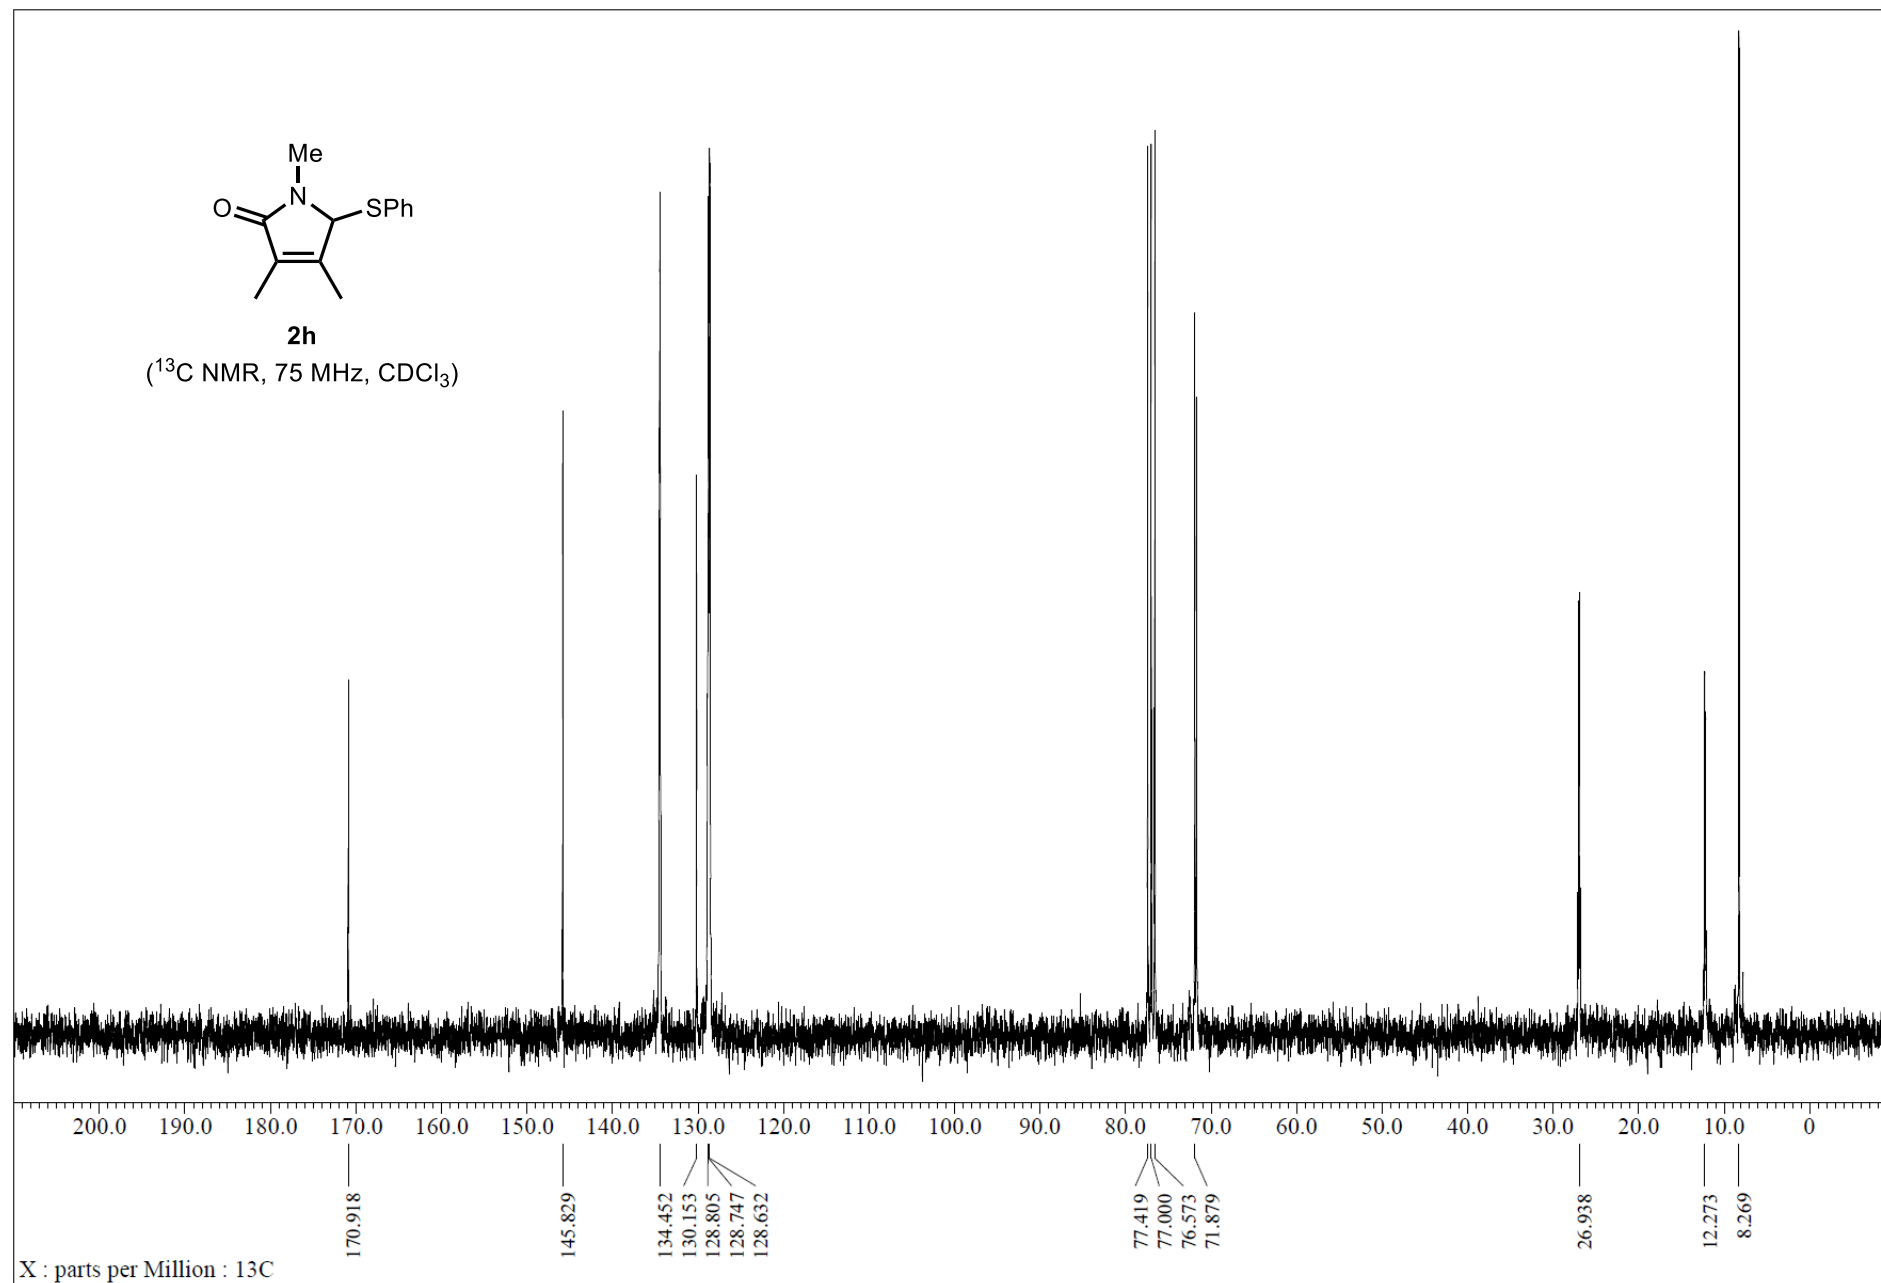

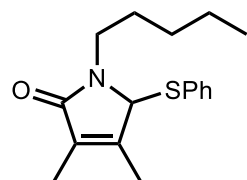

**2i**  
 ( $^1\text{H}$  NMR, 300 MHz,  $\text{CDCl}_3$ )

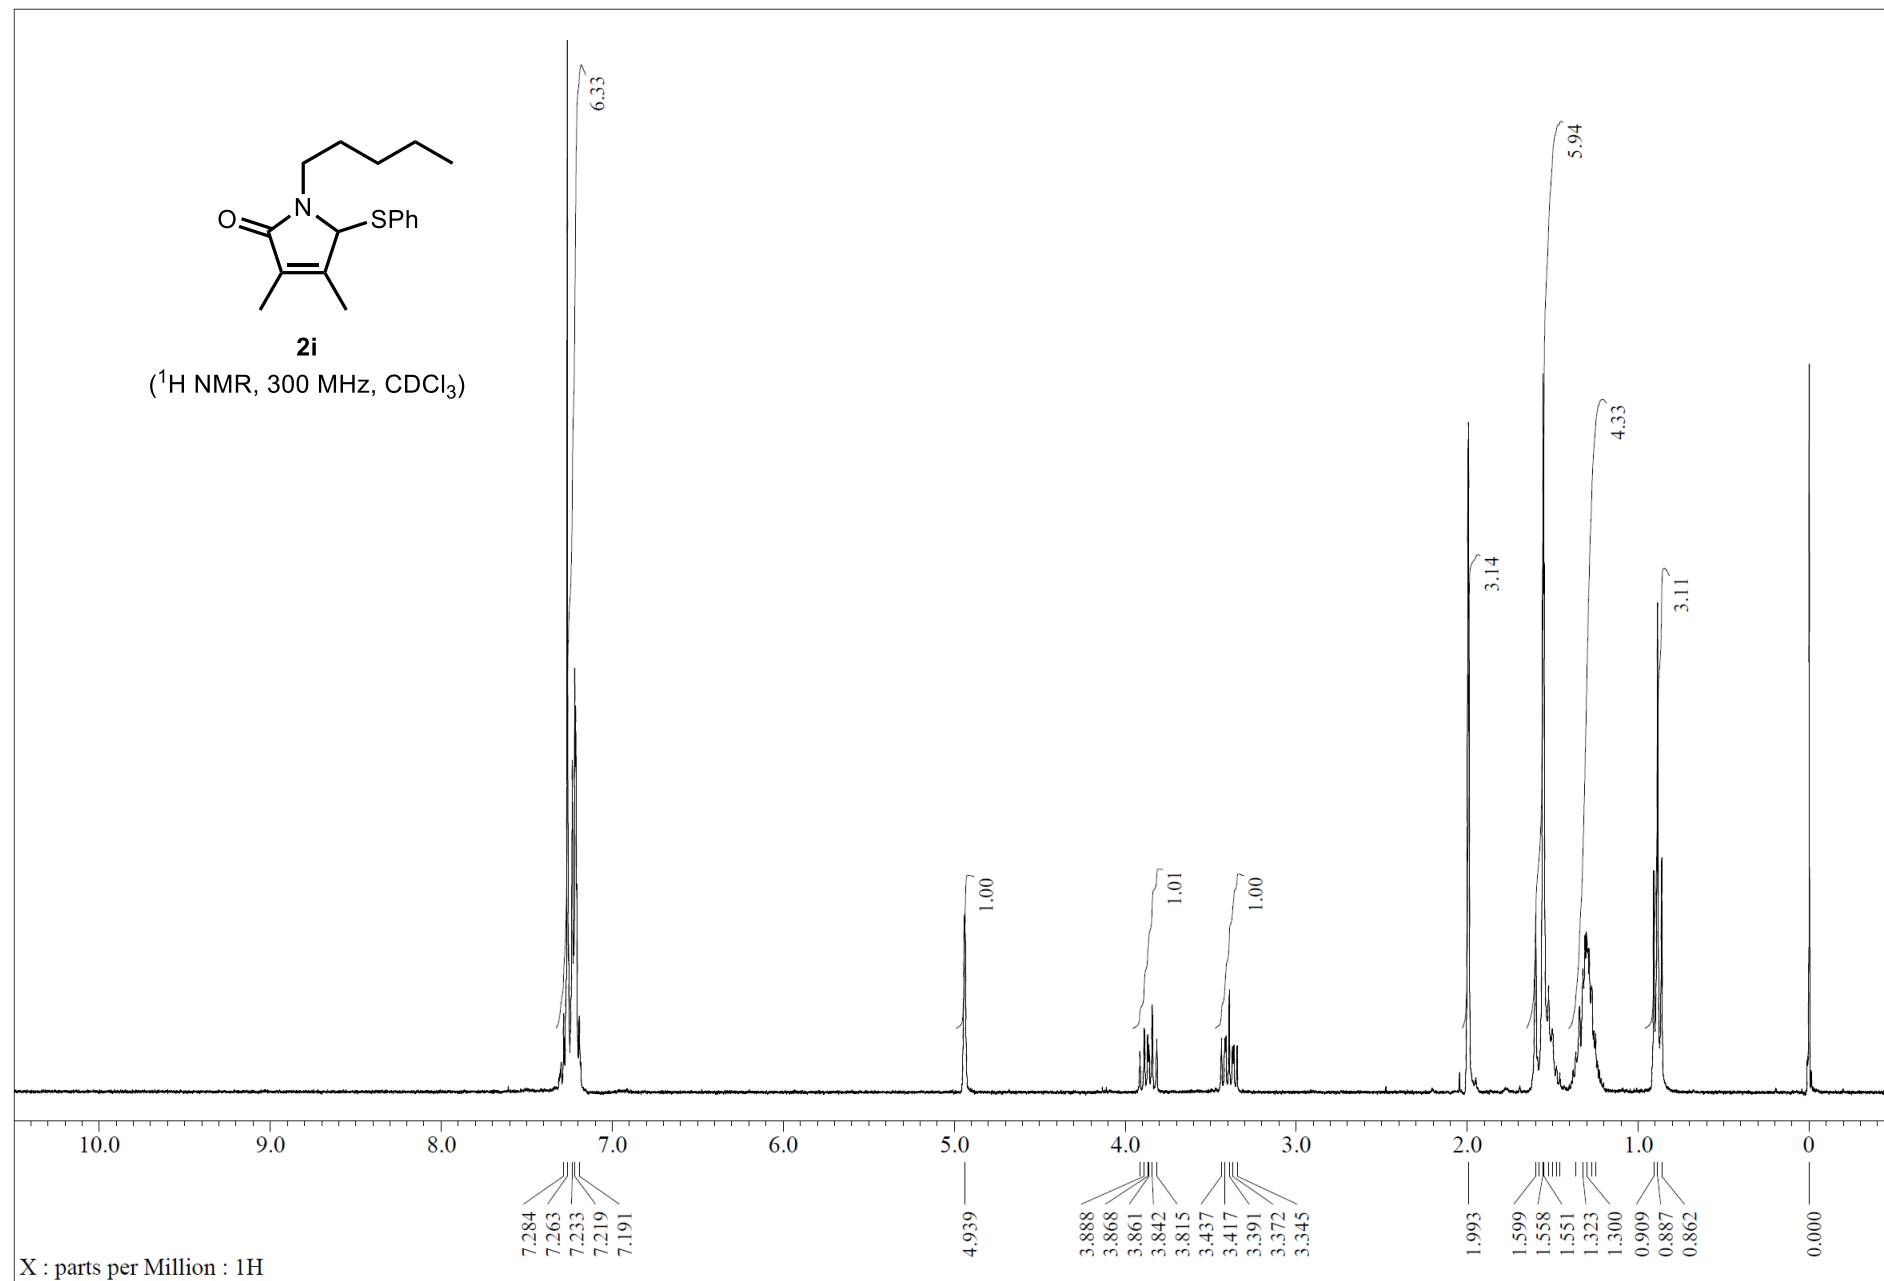

X : parts per Million :  $^1\text{H}$

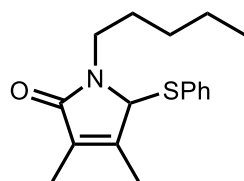

**2i**

( $^{13}\text{C}$  NMR, 75 MHz,  $\text{CDCl}_3$ )

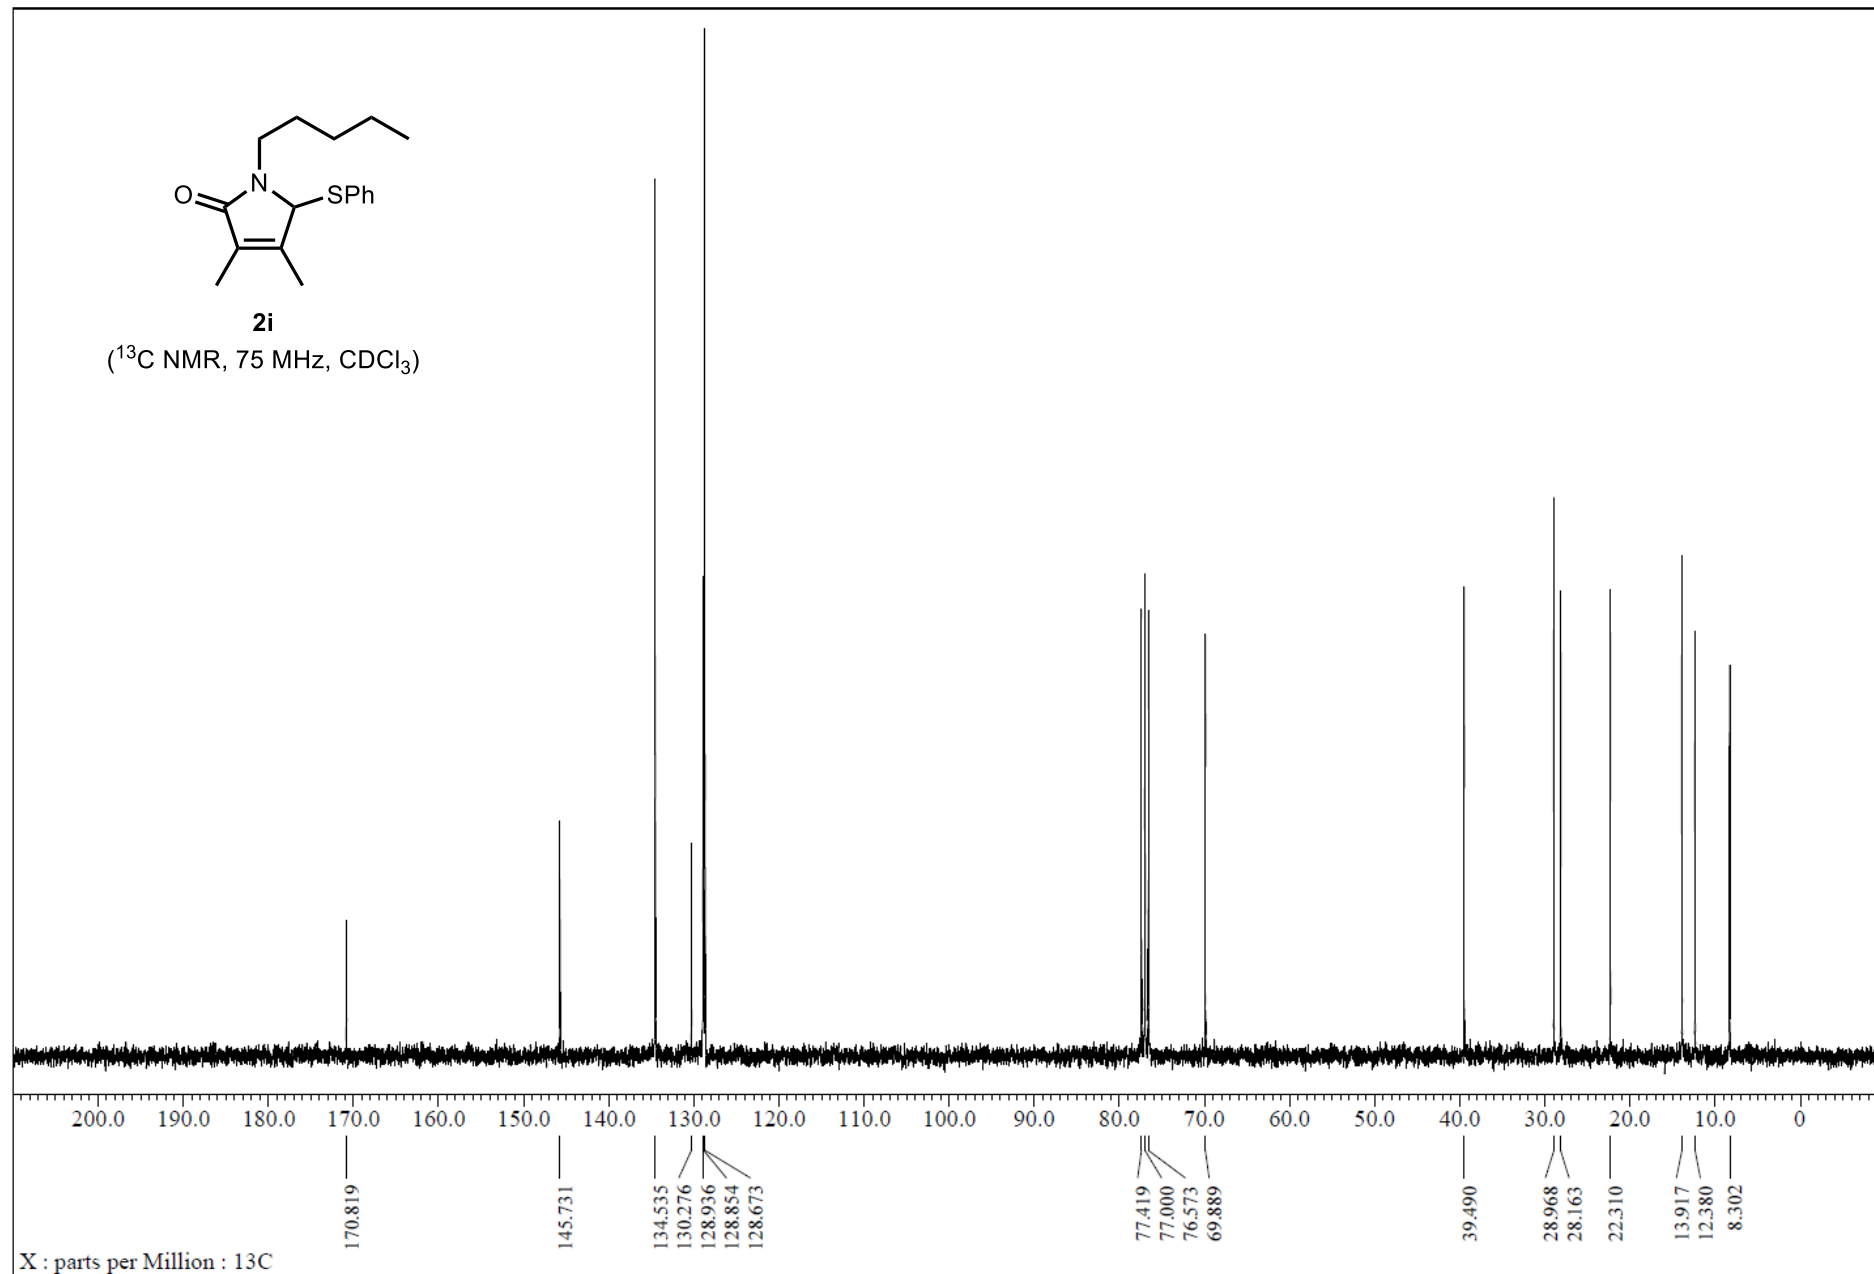



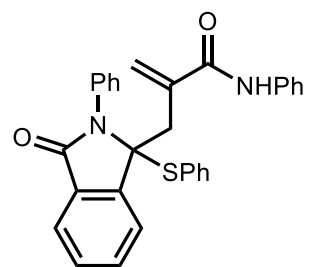

**3b**

(<sup>1</sup>H NMR, 300 MHz, CDCl<sub>3</sub>)

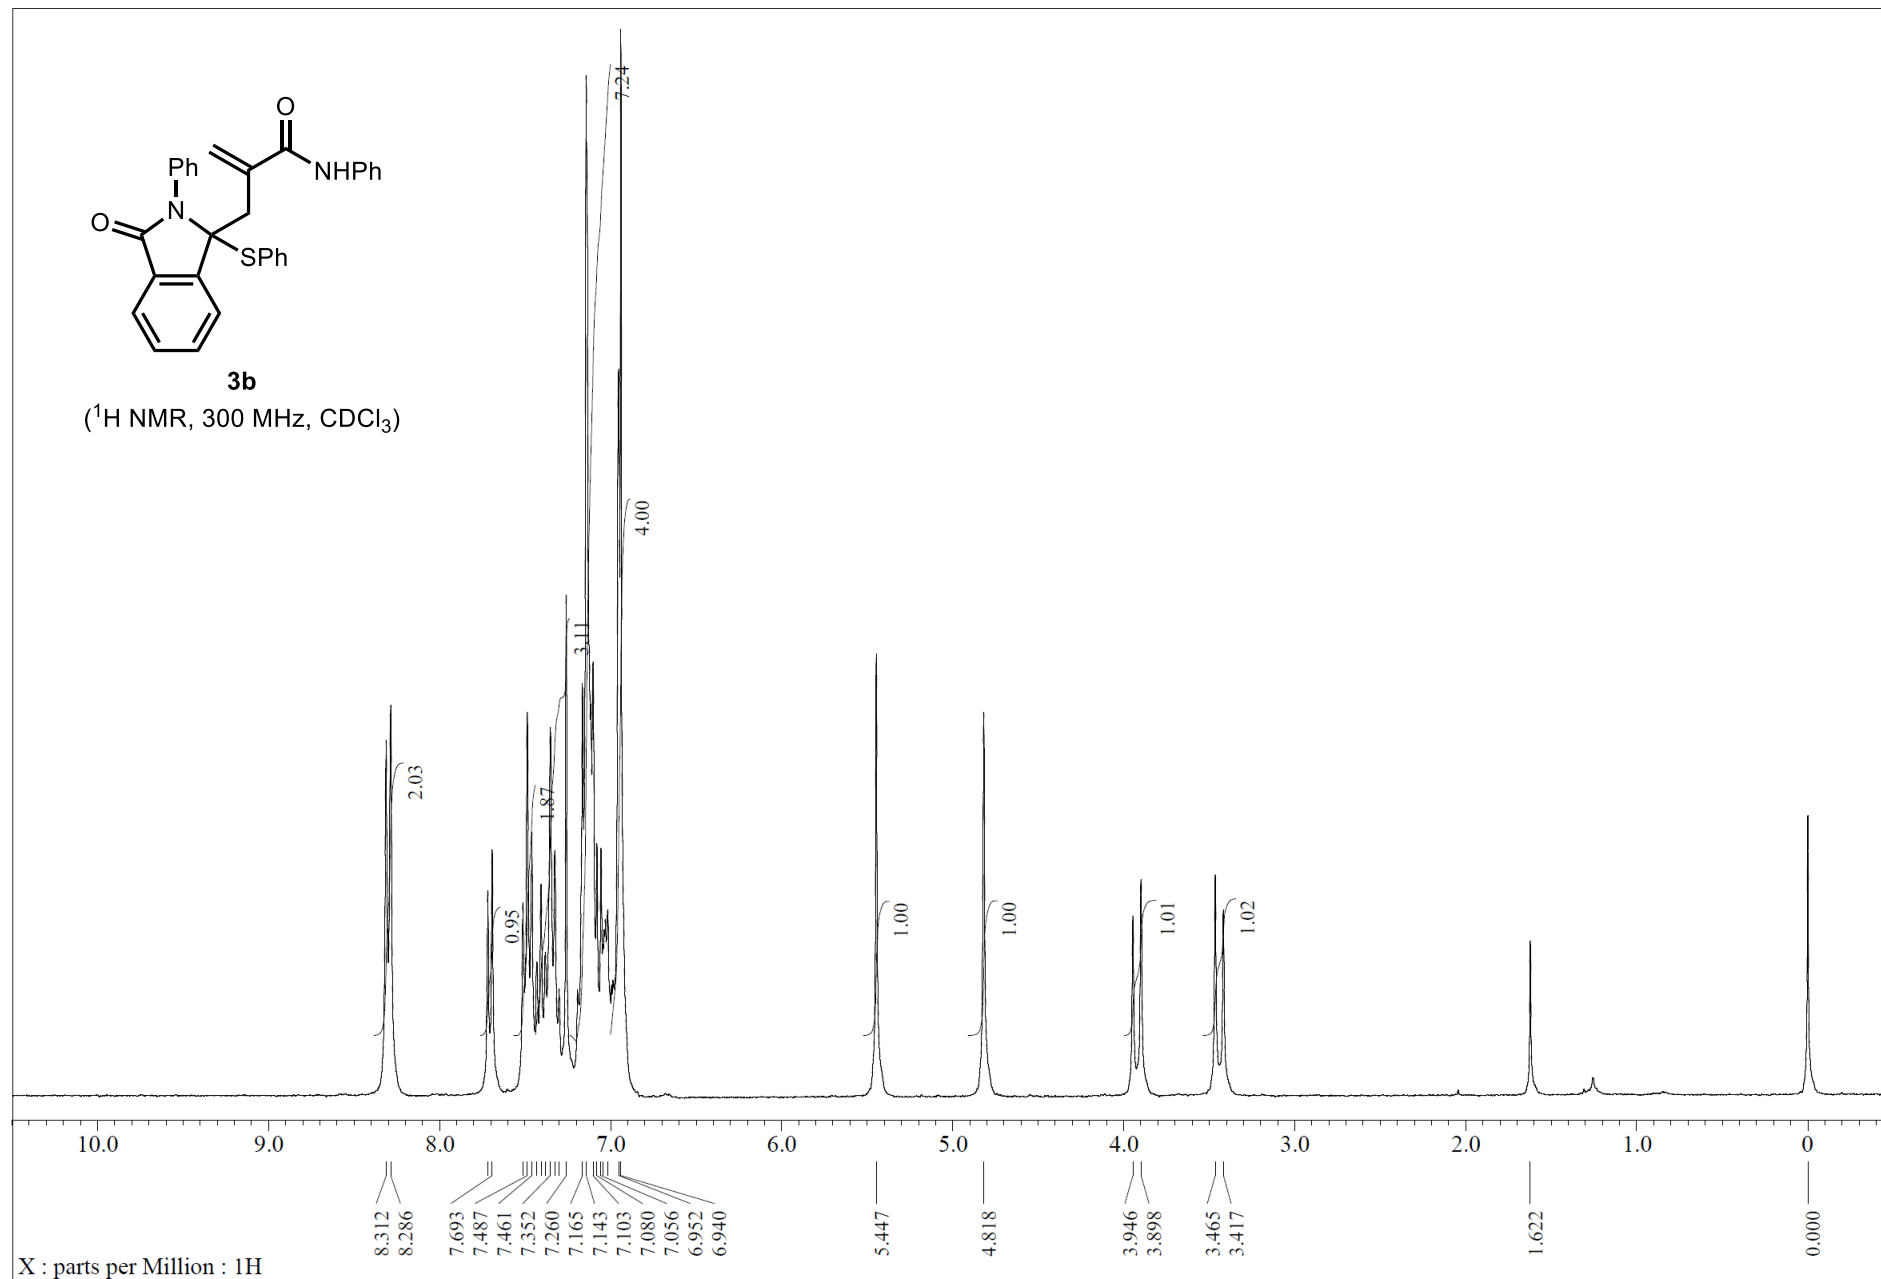

X : parts per Million : 1H

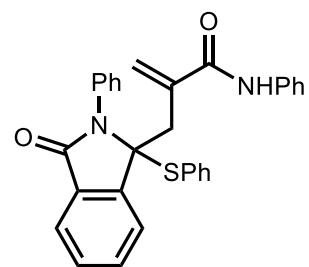

**3b**

( $^{13}\text{C}$  NMR, 75 MHz,  $\text{CDCl}_3$ )

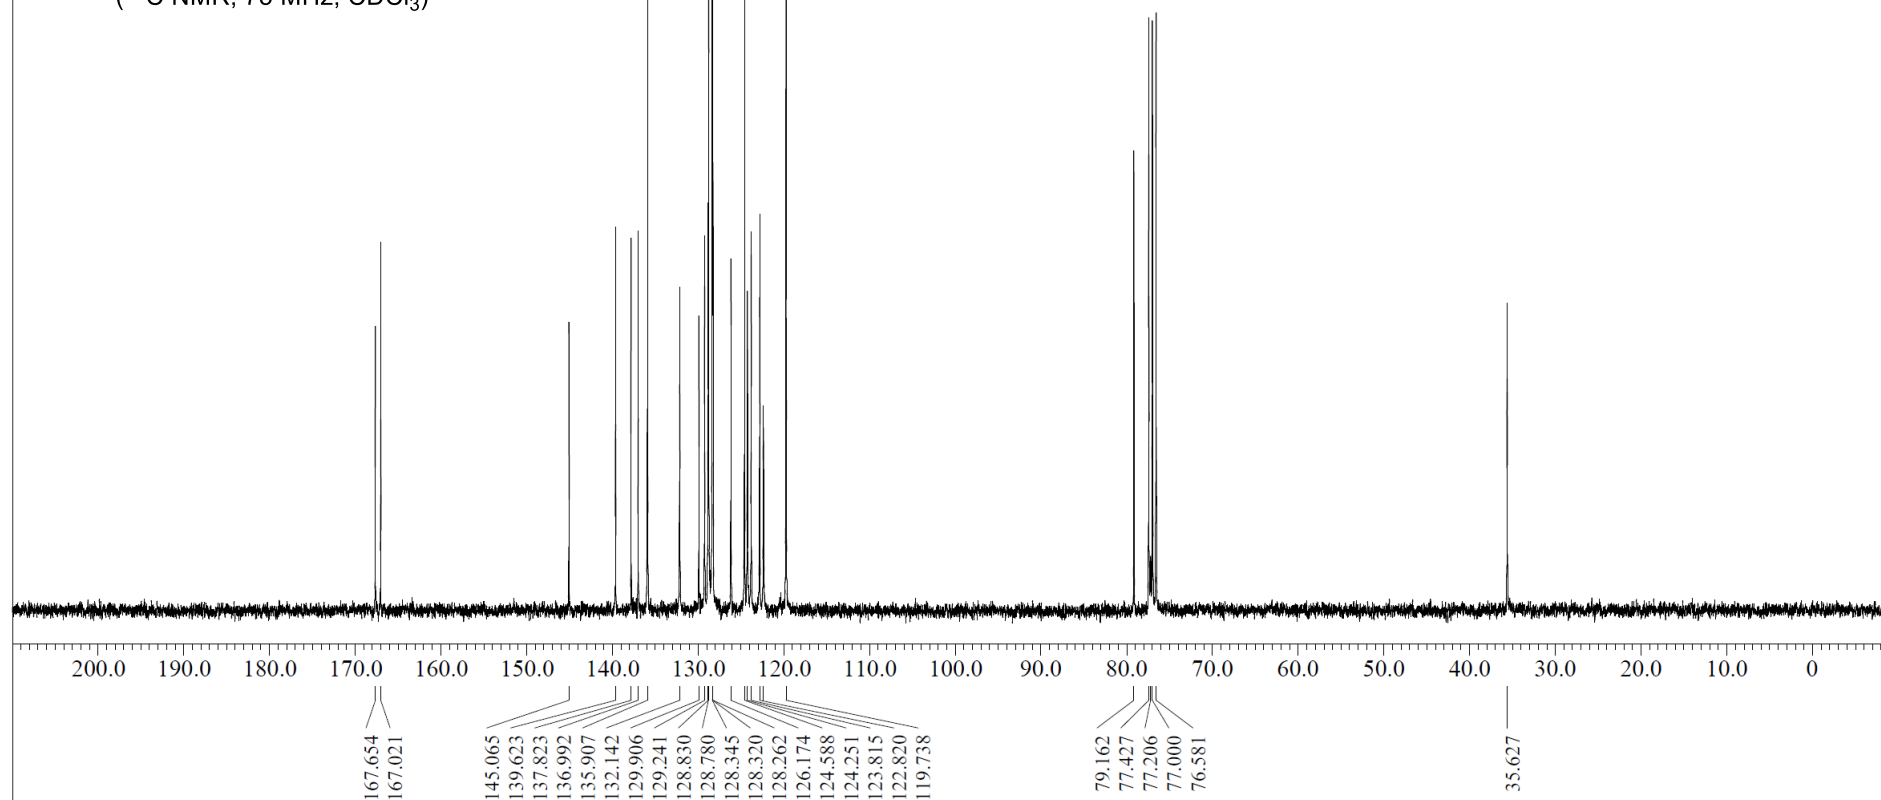

X : parts per Million :  $^{13}\text{C}$

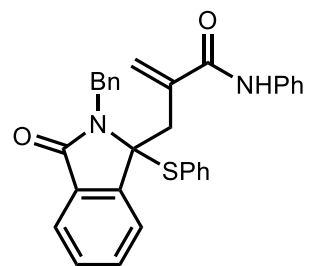

**3c**

(<sup>1</sup>H NMR, 300 MHz, CDCl<sub>3</sub>)

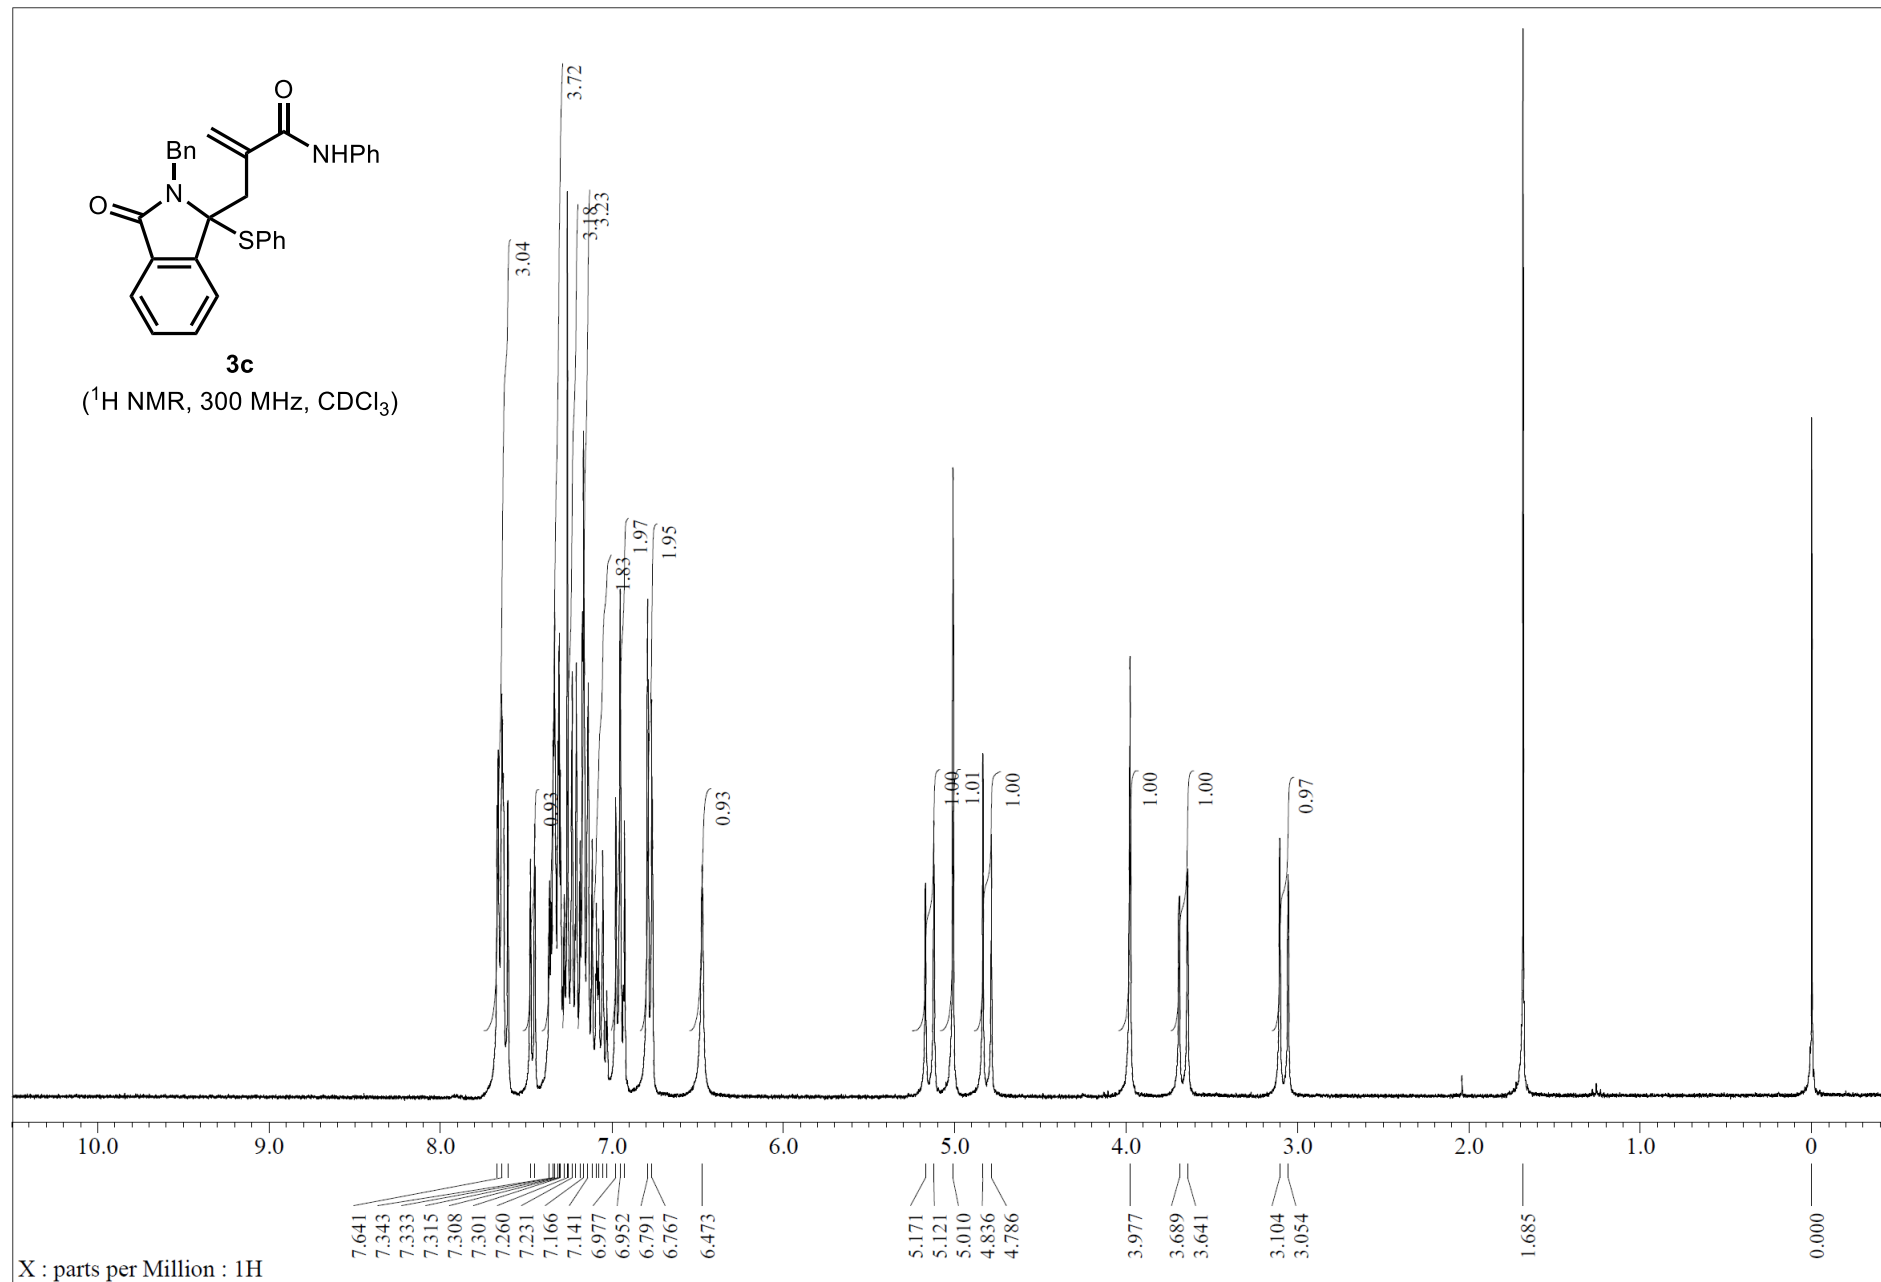

X : parts per Million : 1H

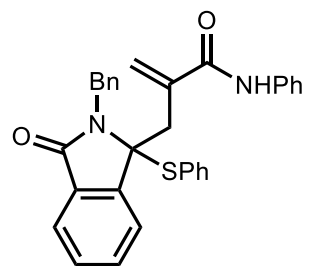

**3c**

( $^{13}\text{C}$  NMR, 75 MHz,  $\text{CDCl}_3$ )

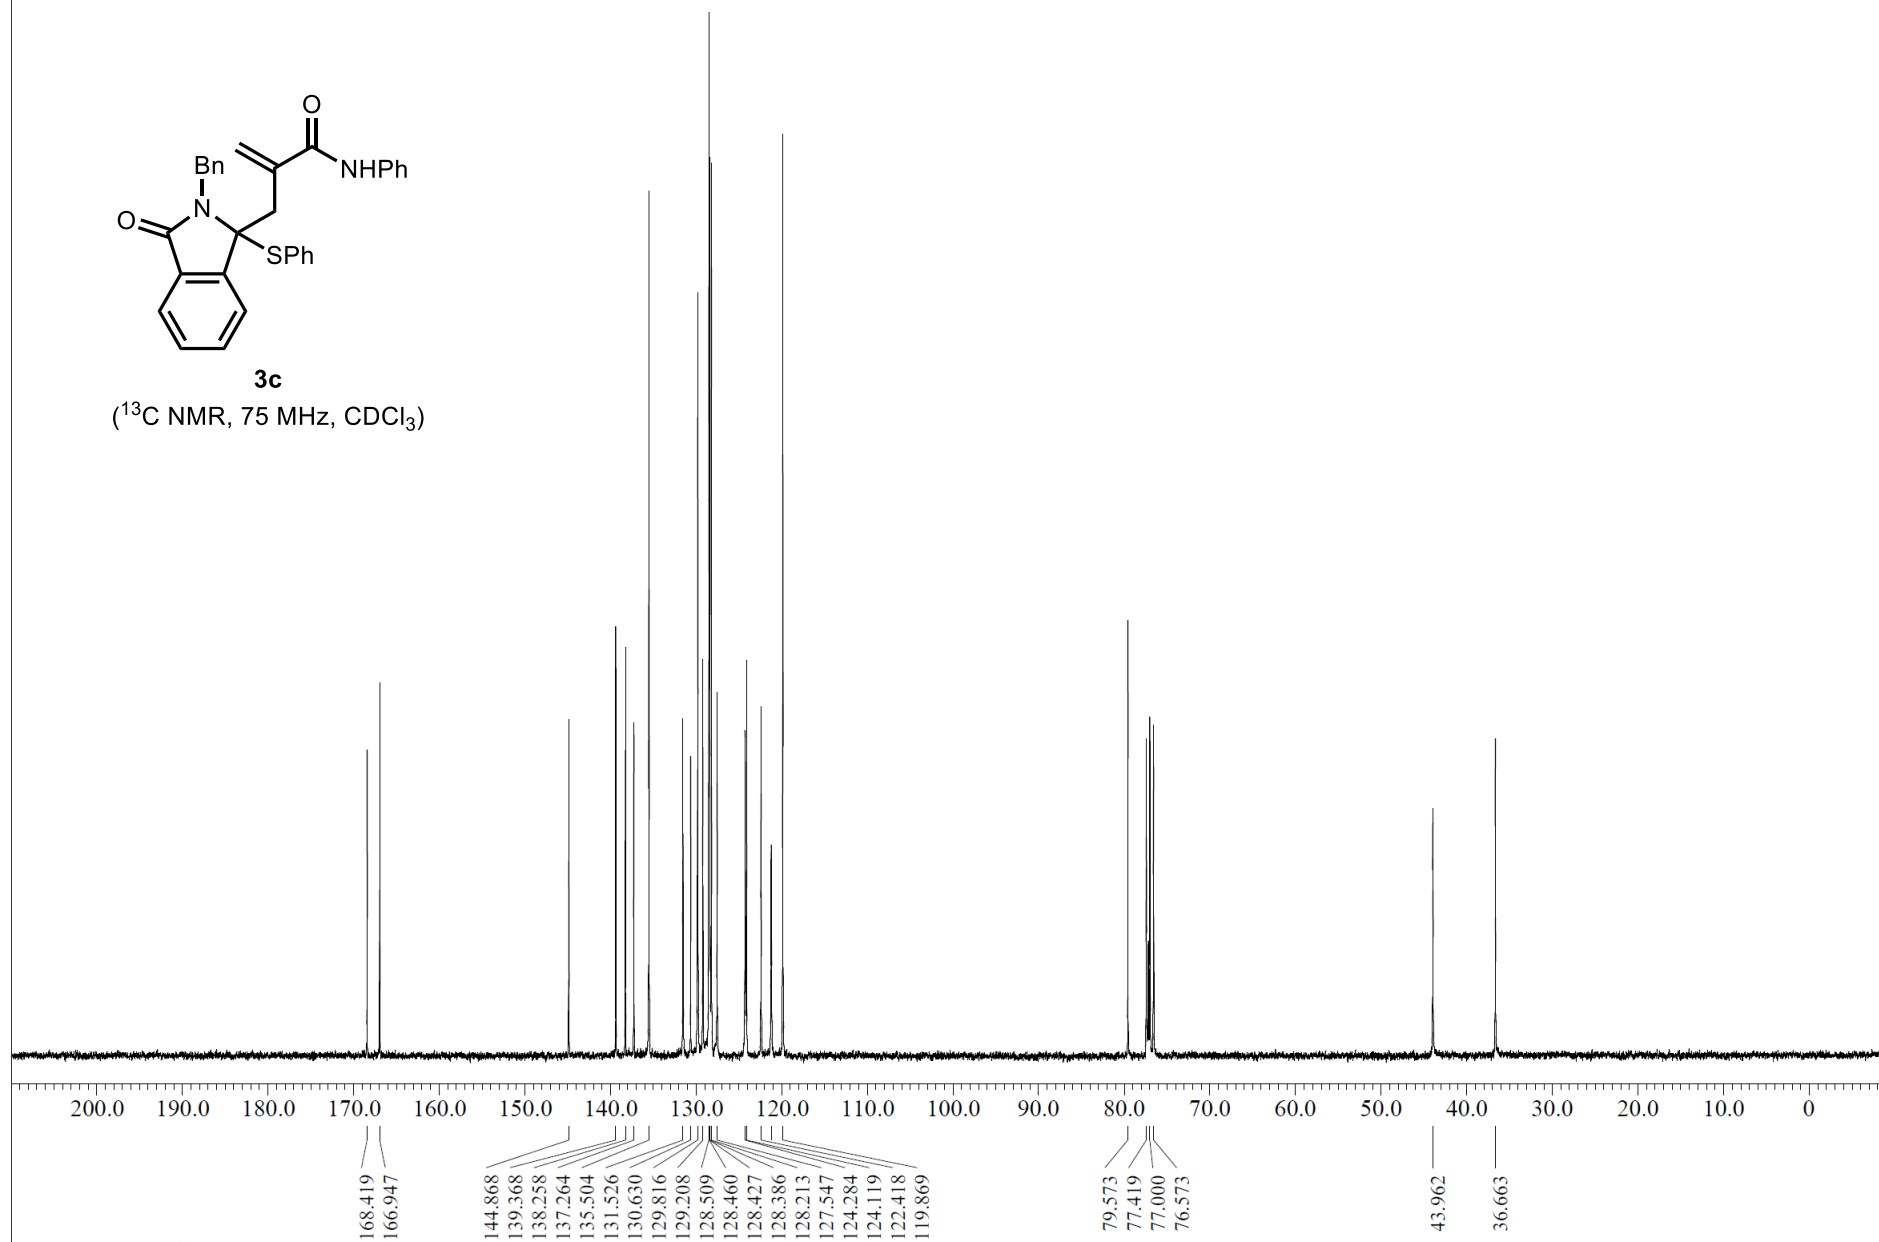

X : parts per Million :  $^{13}\text{C}$

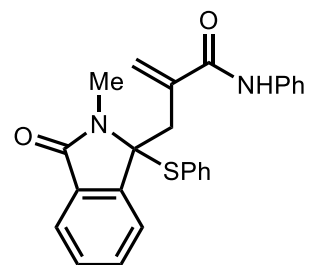

**3d**

(<sup>1</sup>H NMR, 300 MHz, CDCl<sub>3</sub>)

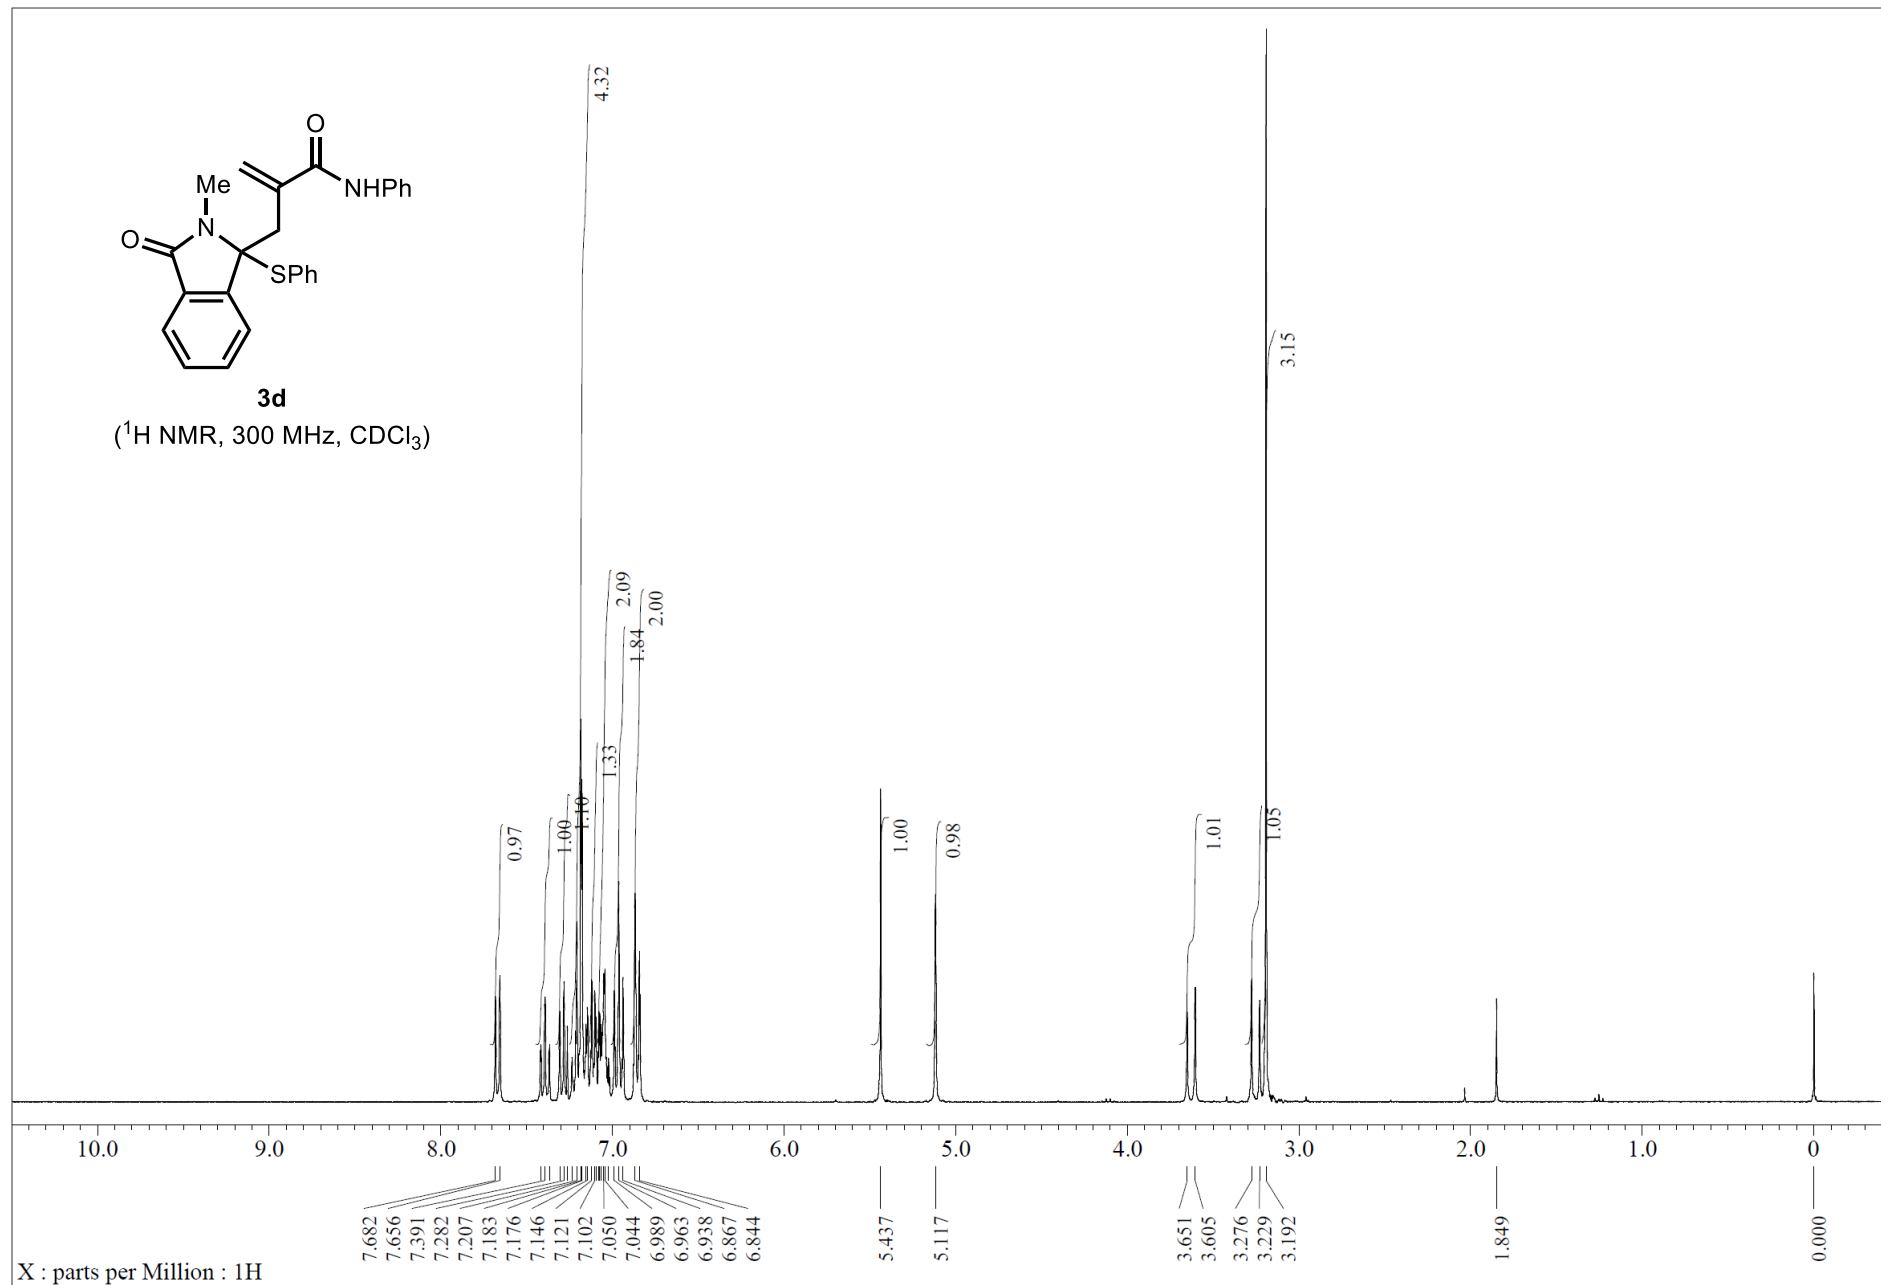

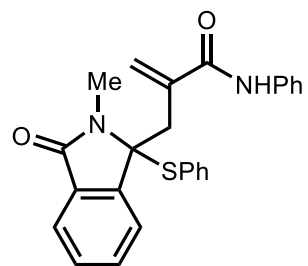

**3d**

( $^{13}\text{C}$  NMR, 75 MHz,  $\text{CDCl}_3$ )

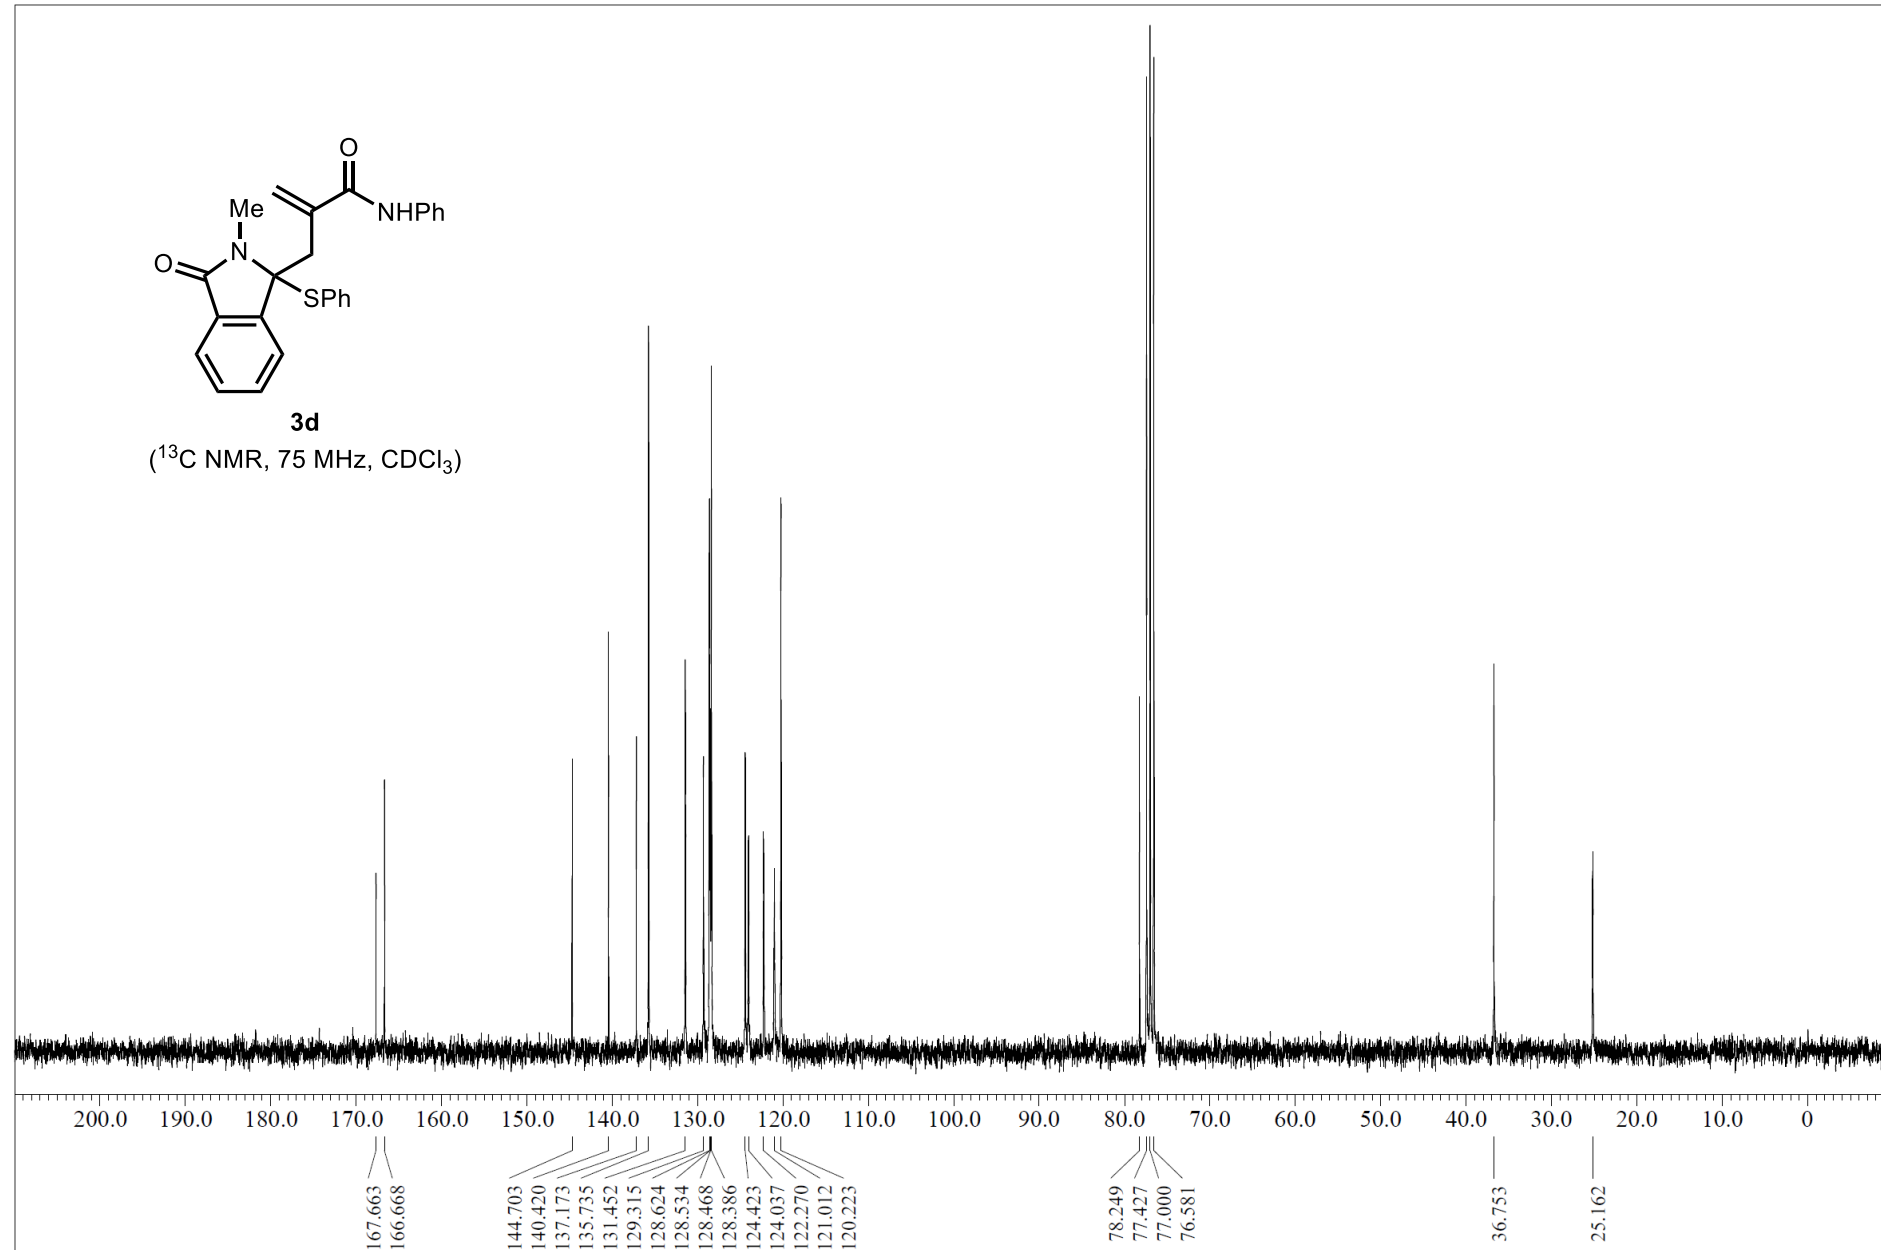

X : parts per Million :  $^{13}\text{C}$

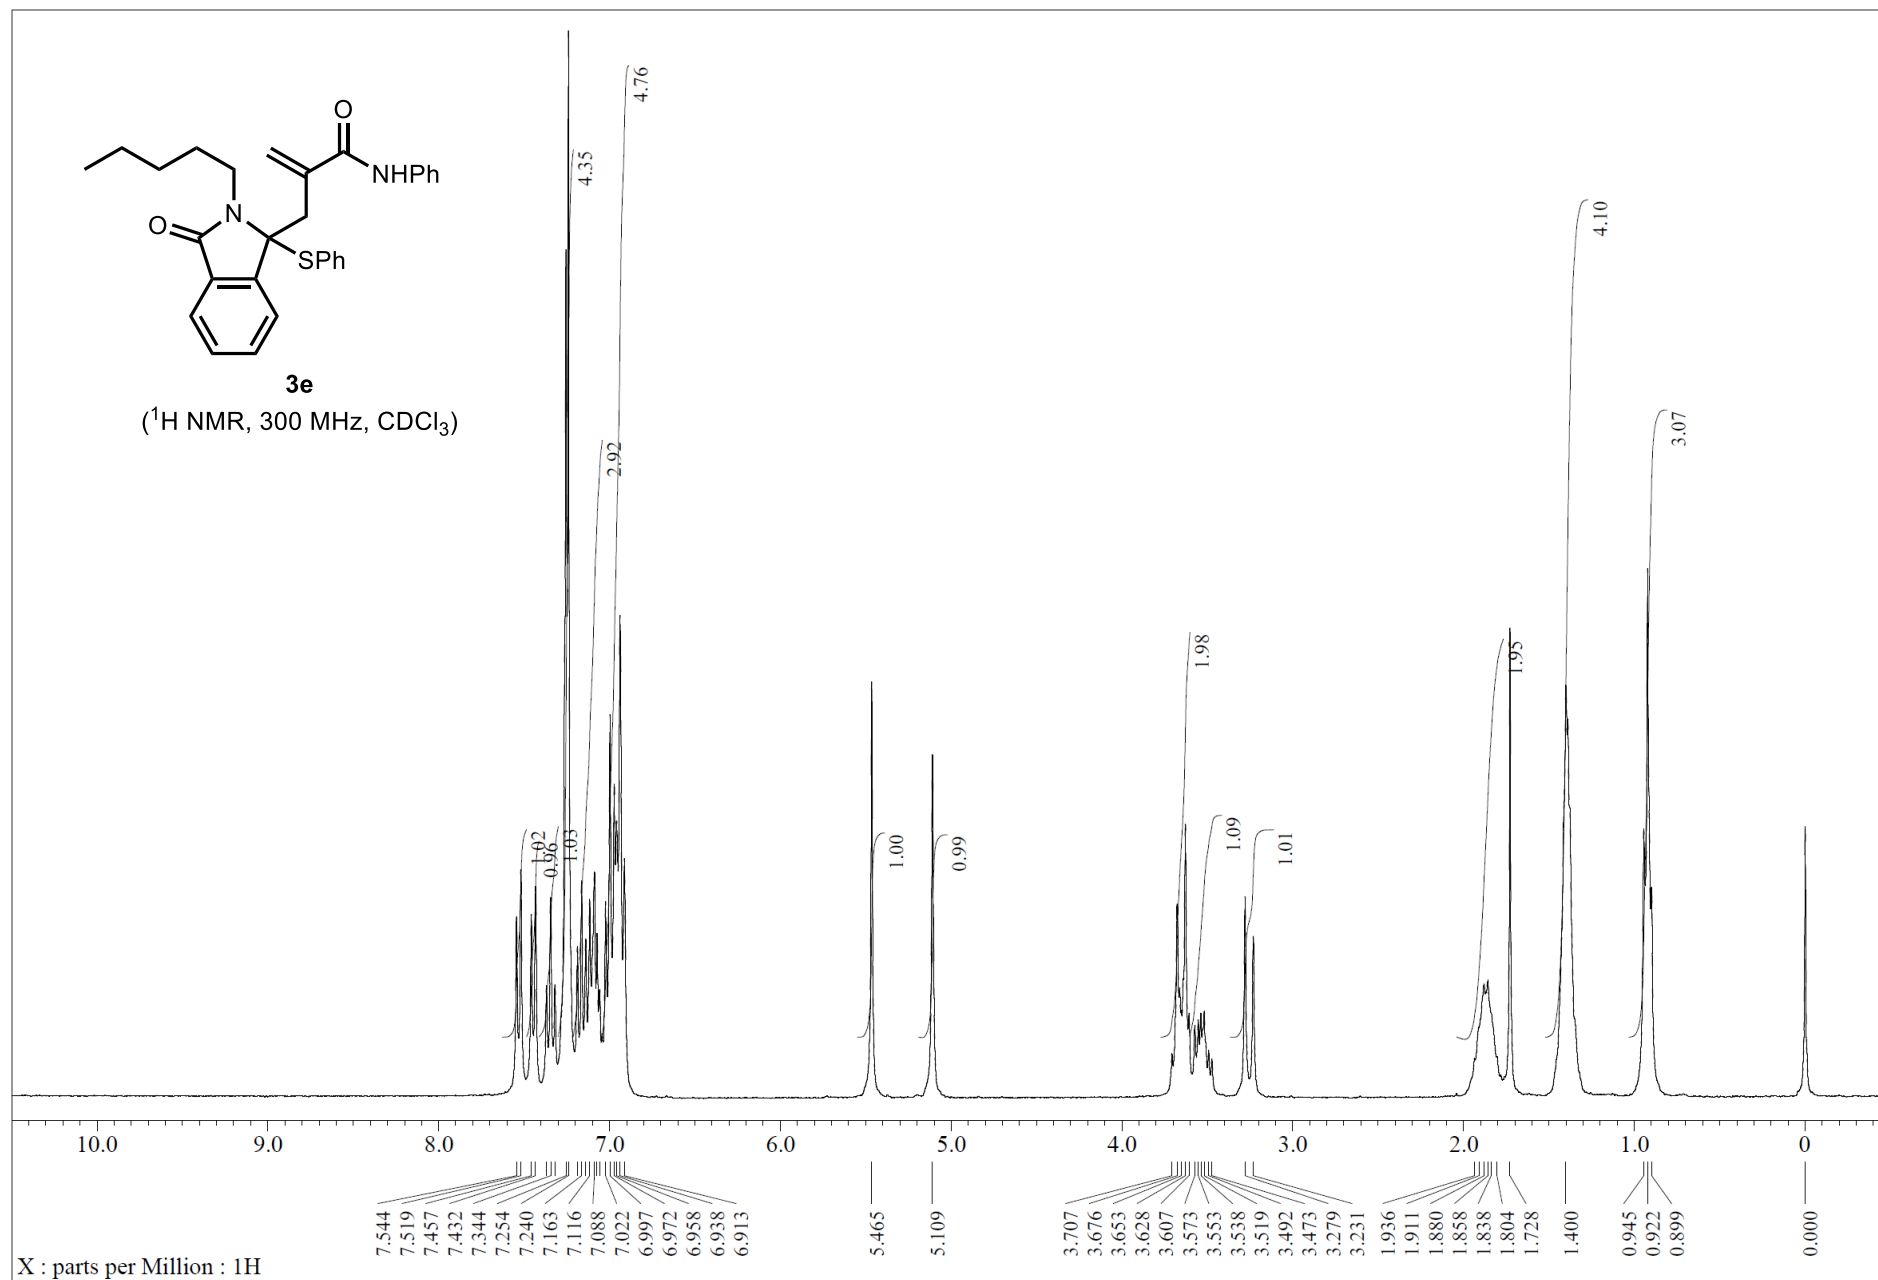

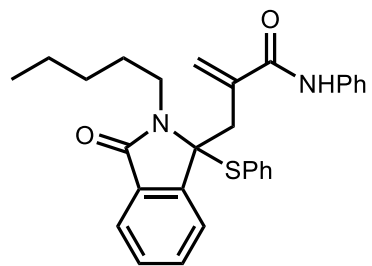

**3e**

( $^{13}\text{C}$  NMR, 75 MHz,  $\text{CDCl}_3$ )

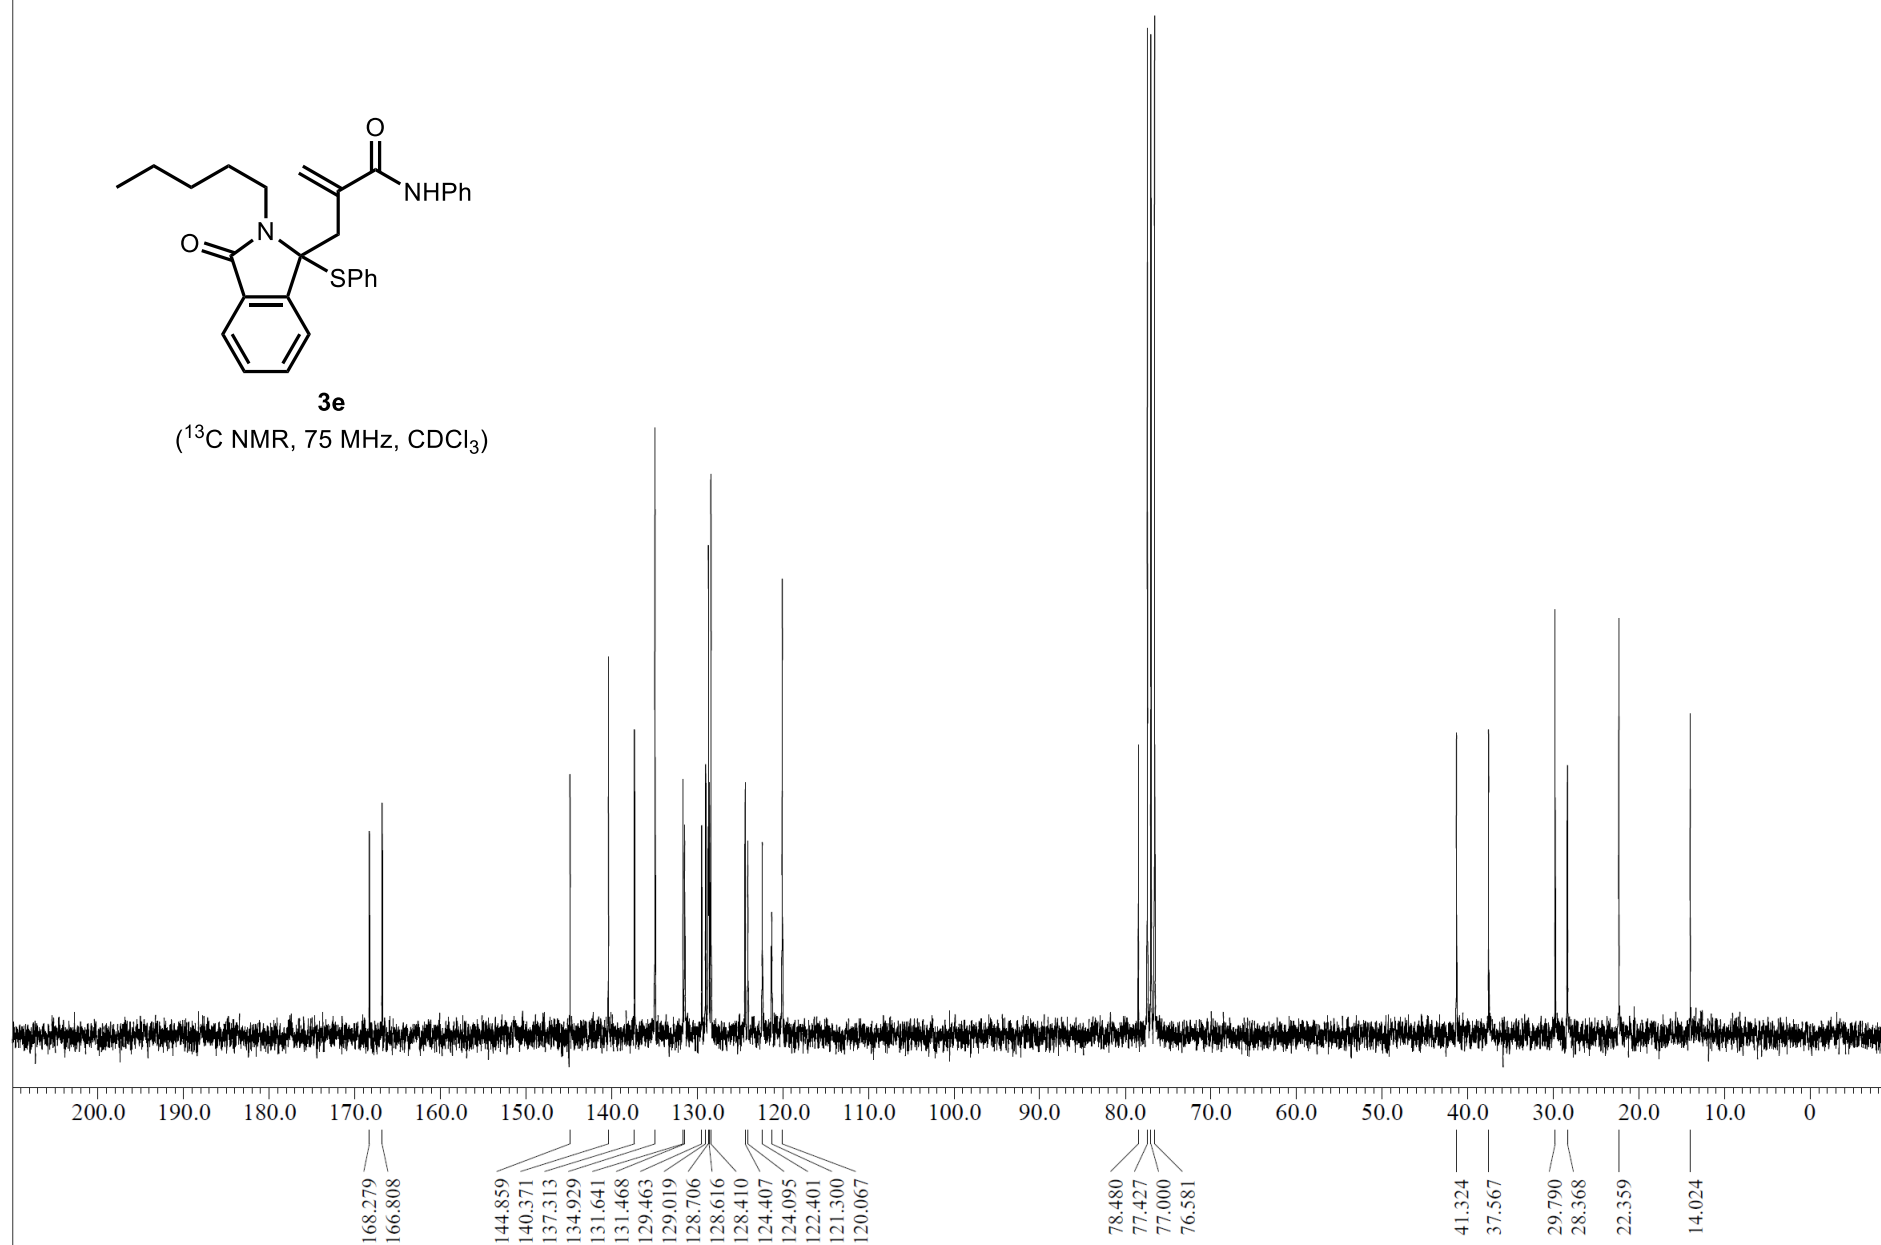

X : parts per Million : 13C



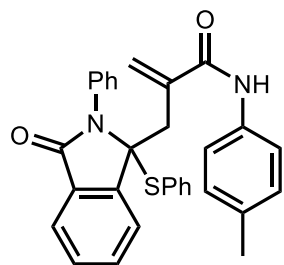

**3f**

(<sup>1</sup>H NMR, 300 MHz, CDCl<sub>3</sub>)

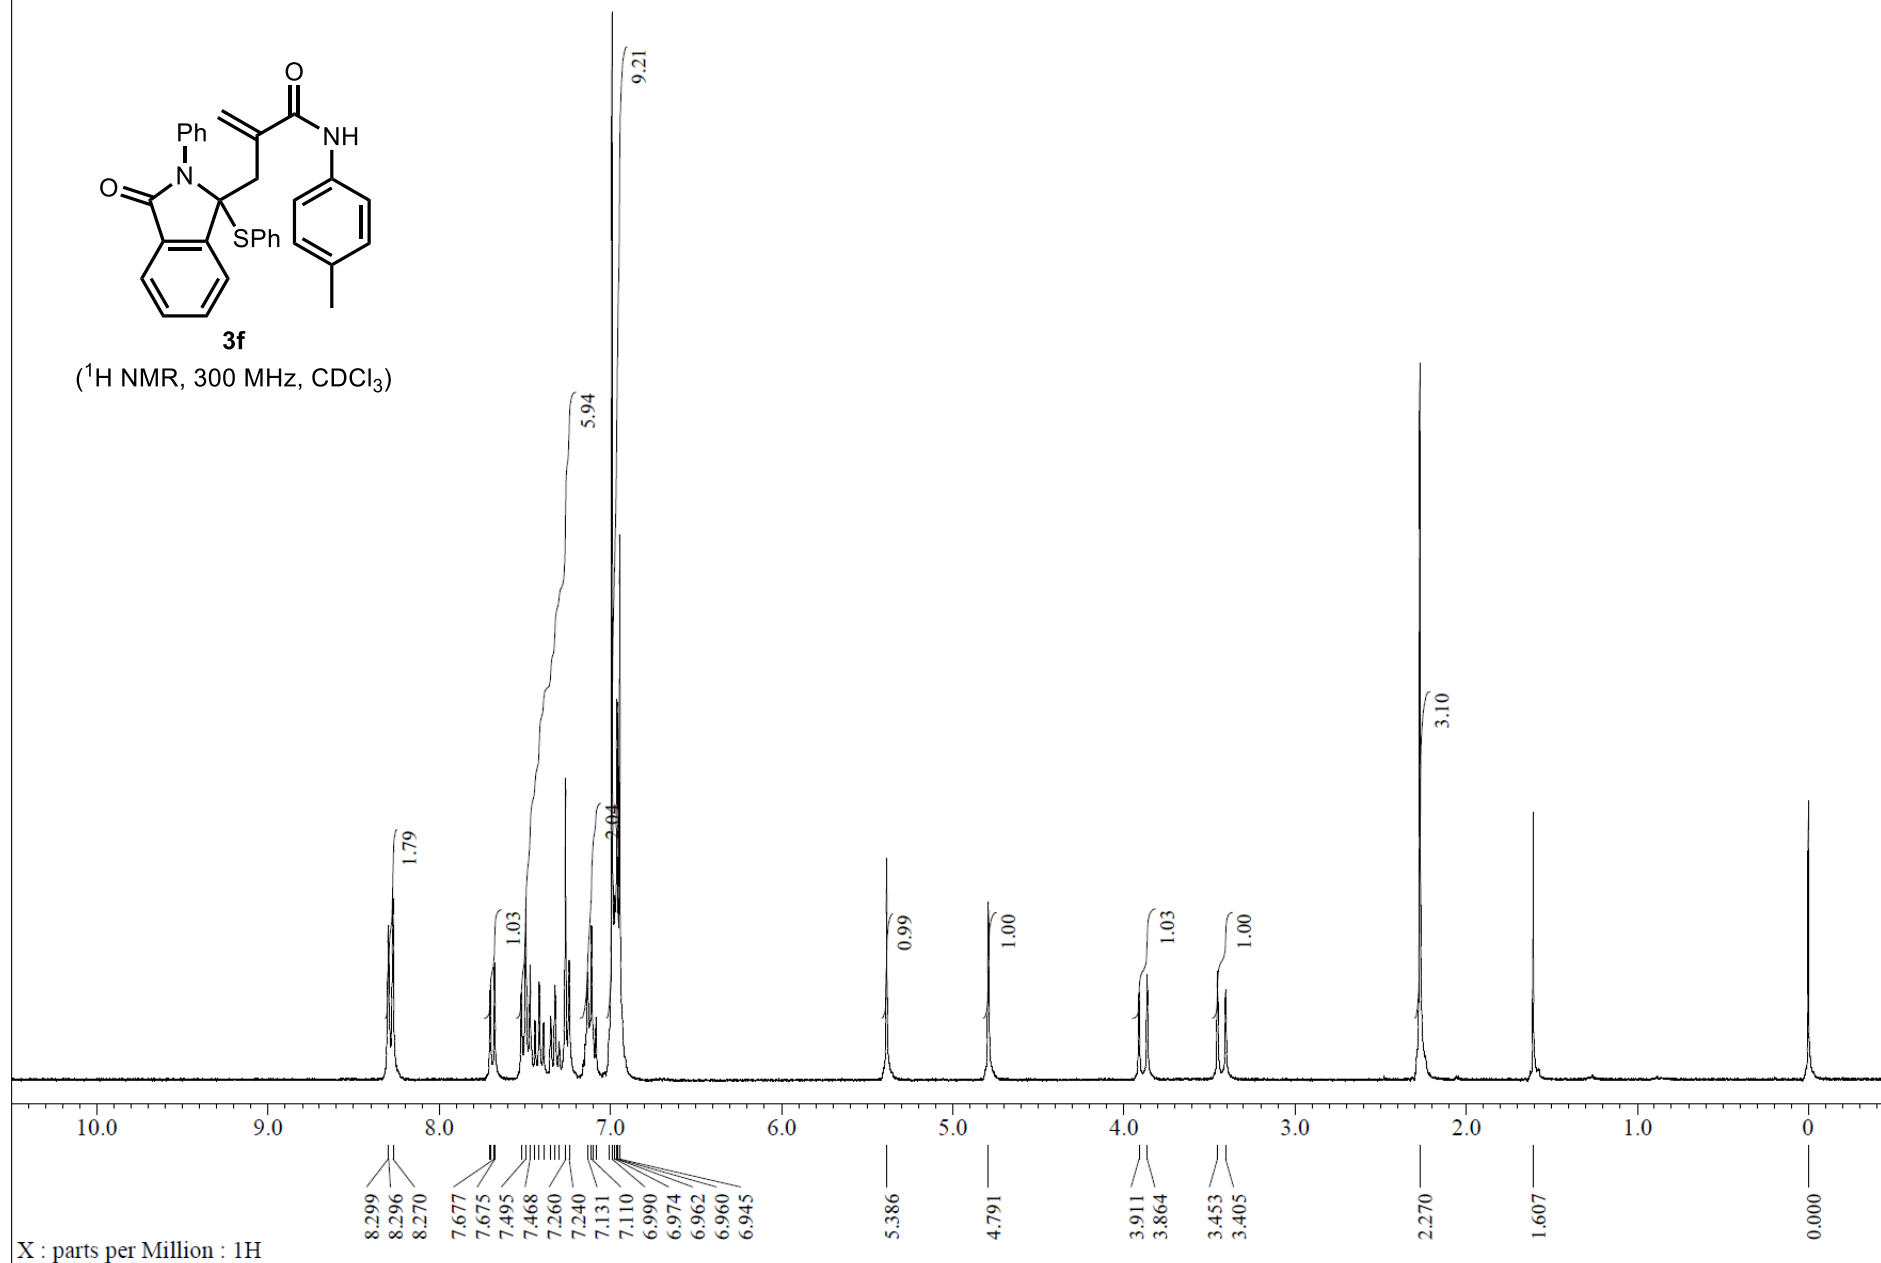

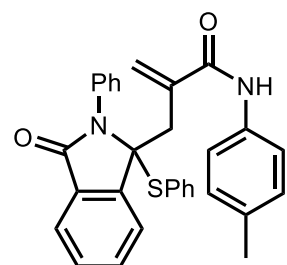

**3f**

( $^{13}\text{C}$  NMR, 75 MHz,  $\text{CDCl}_3$ )

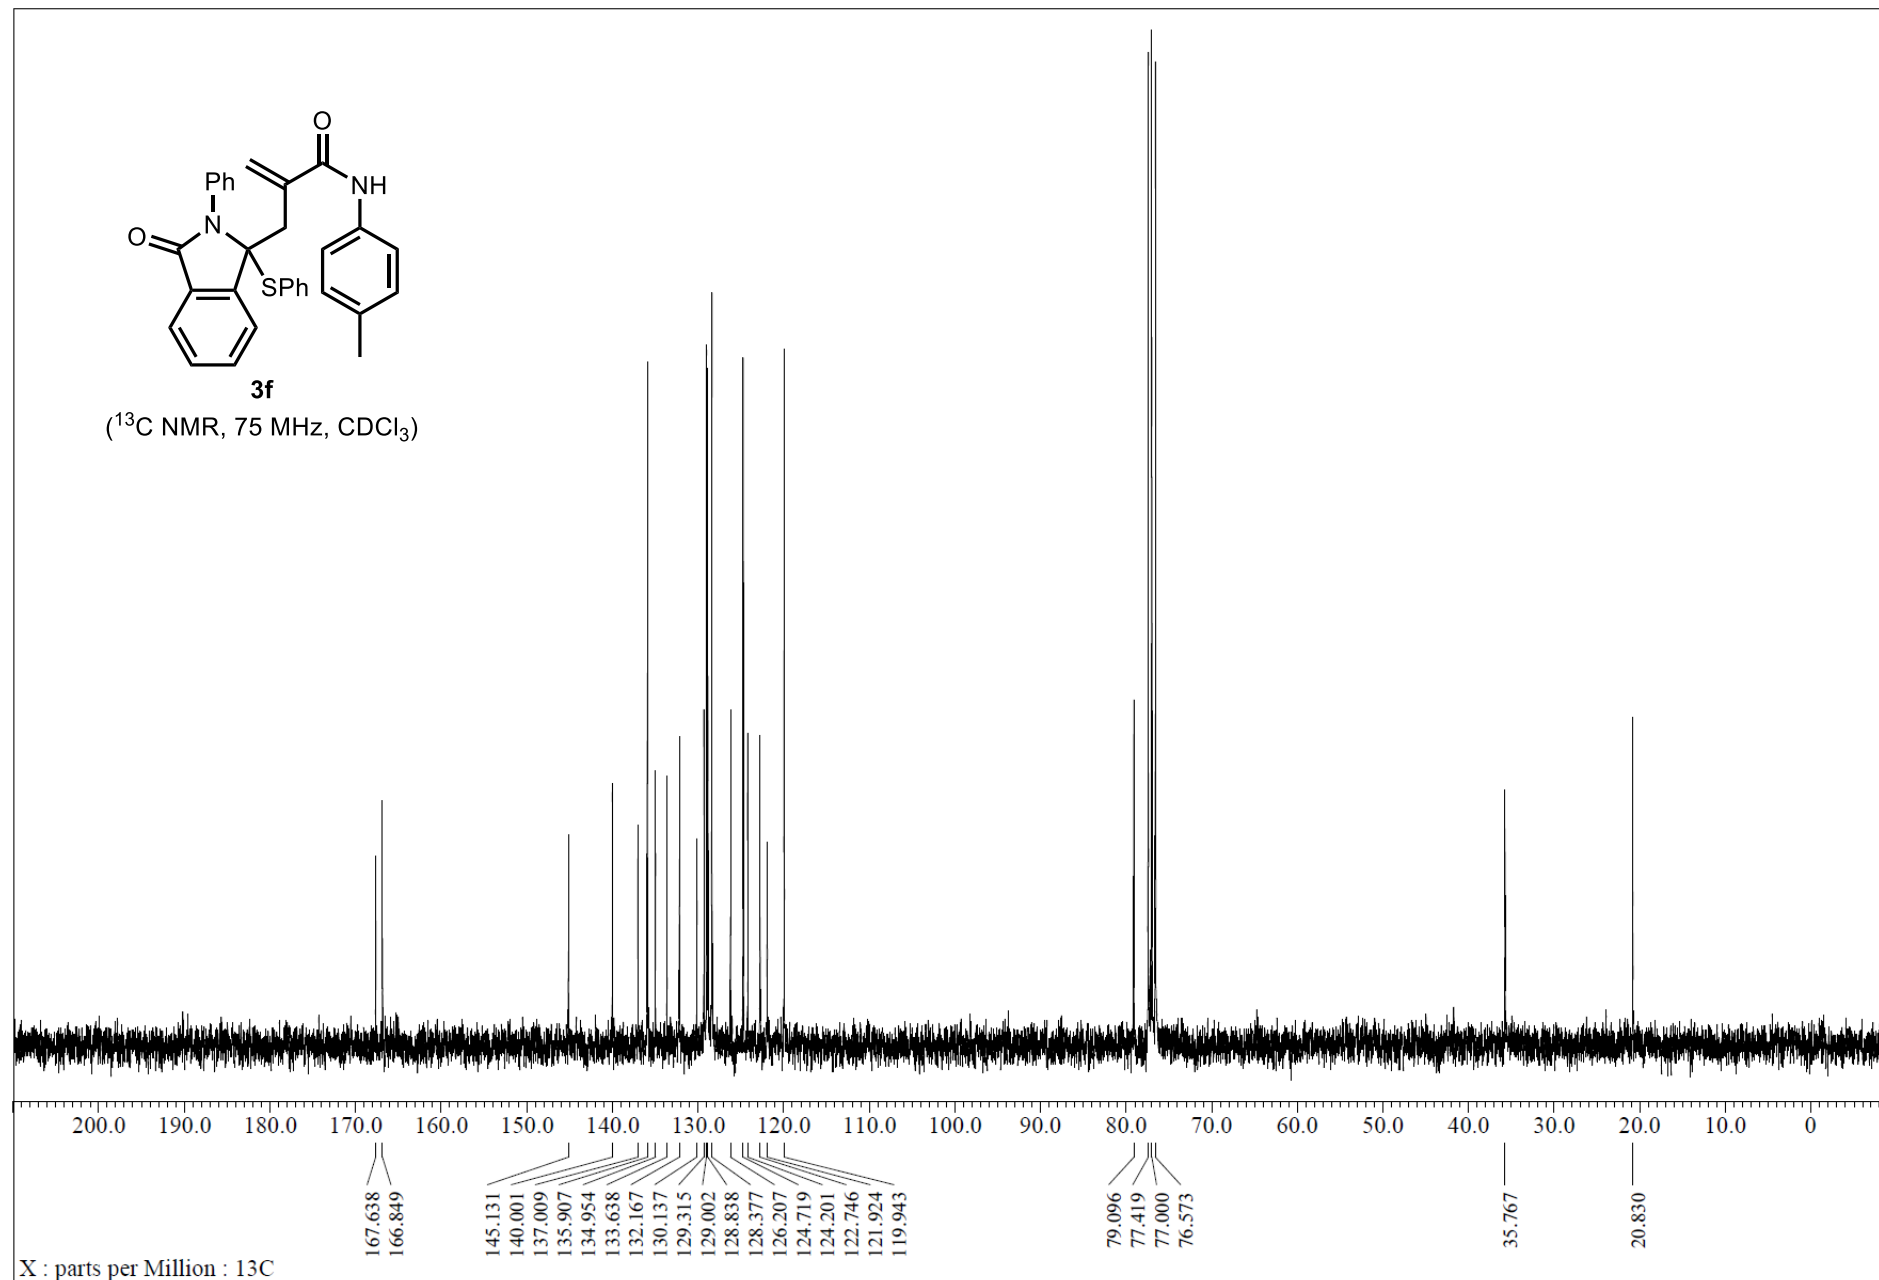

X : parts per Million :  $^{13}\text{C}$

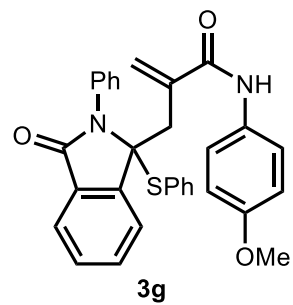

(<sup>1</sup>H NMR, 300 MHz, CDCl<sub>3</sub>)

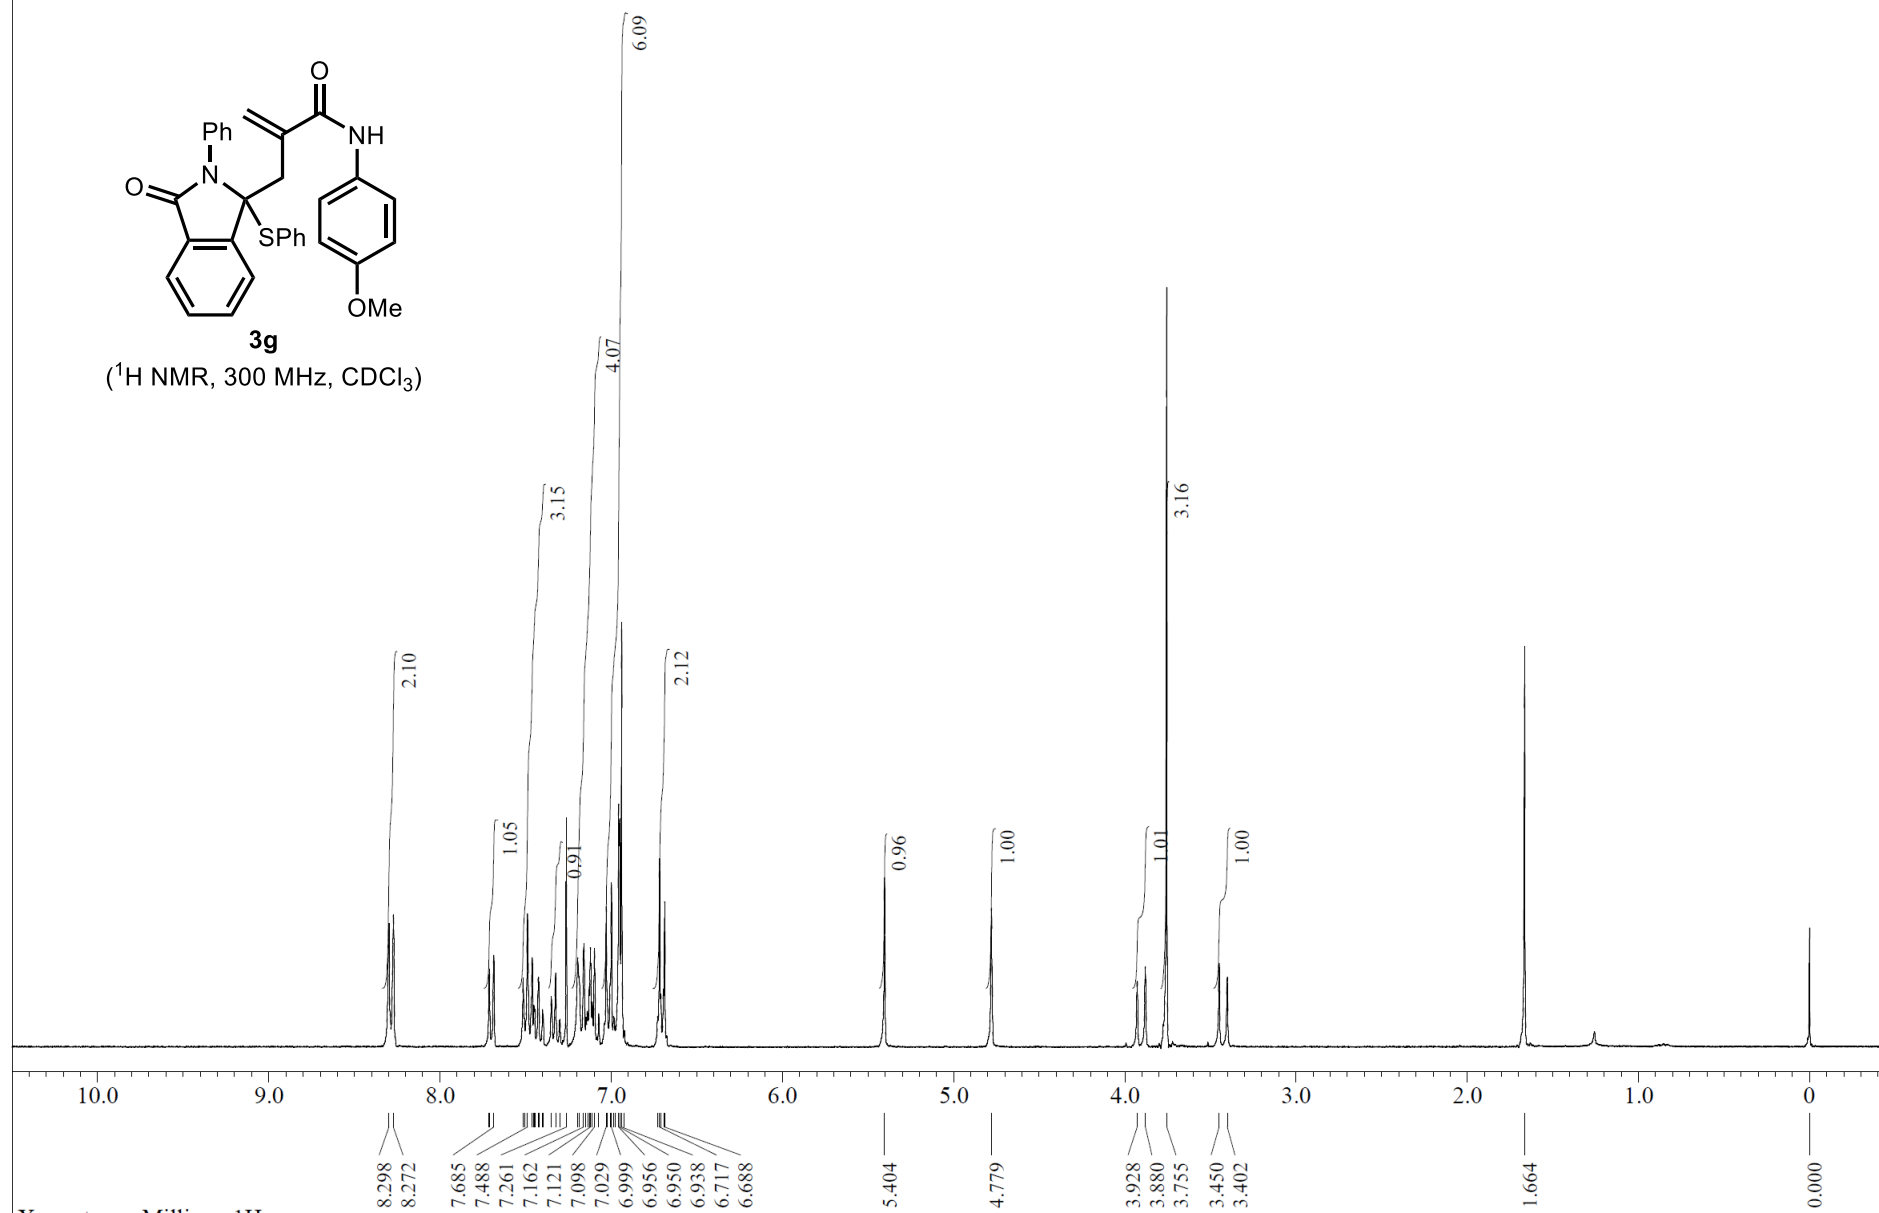

X : parts per Million : 1H

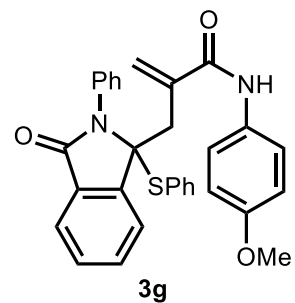

( $^{13}\text{C}$  NMR, 75 MHz,  $\text{CDCl}_3$ )

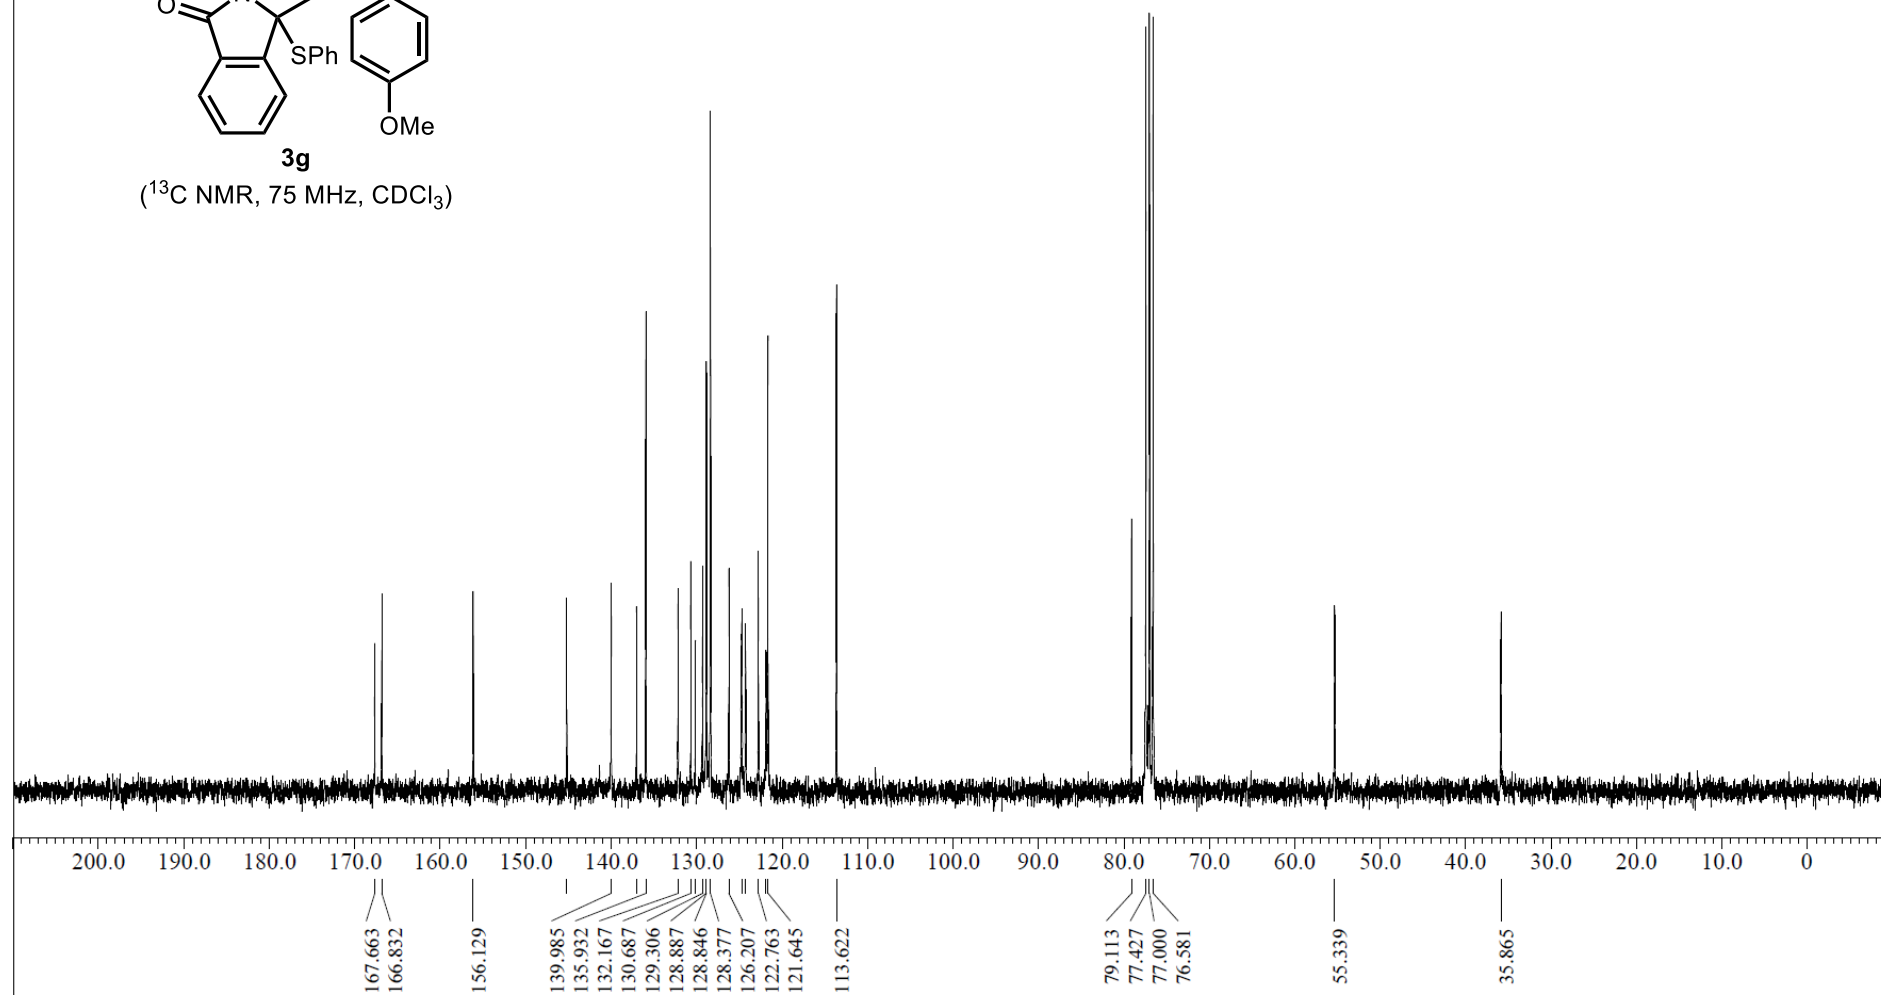

X : parts per Million :  $^{13}\text{C}$

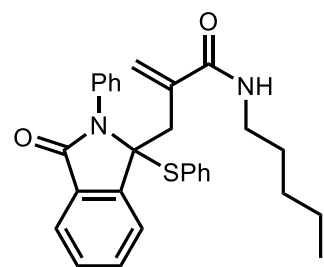

**3h**  
( $^1\text{H}$  NMR, 300 MHz,  $\text{CDCl}_3$ )

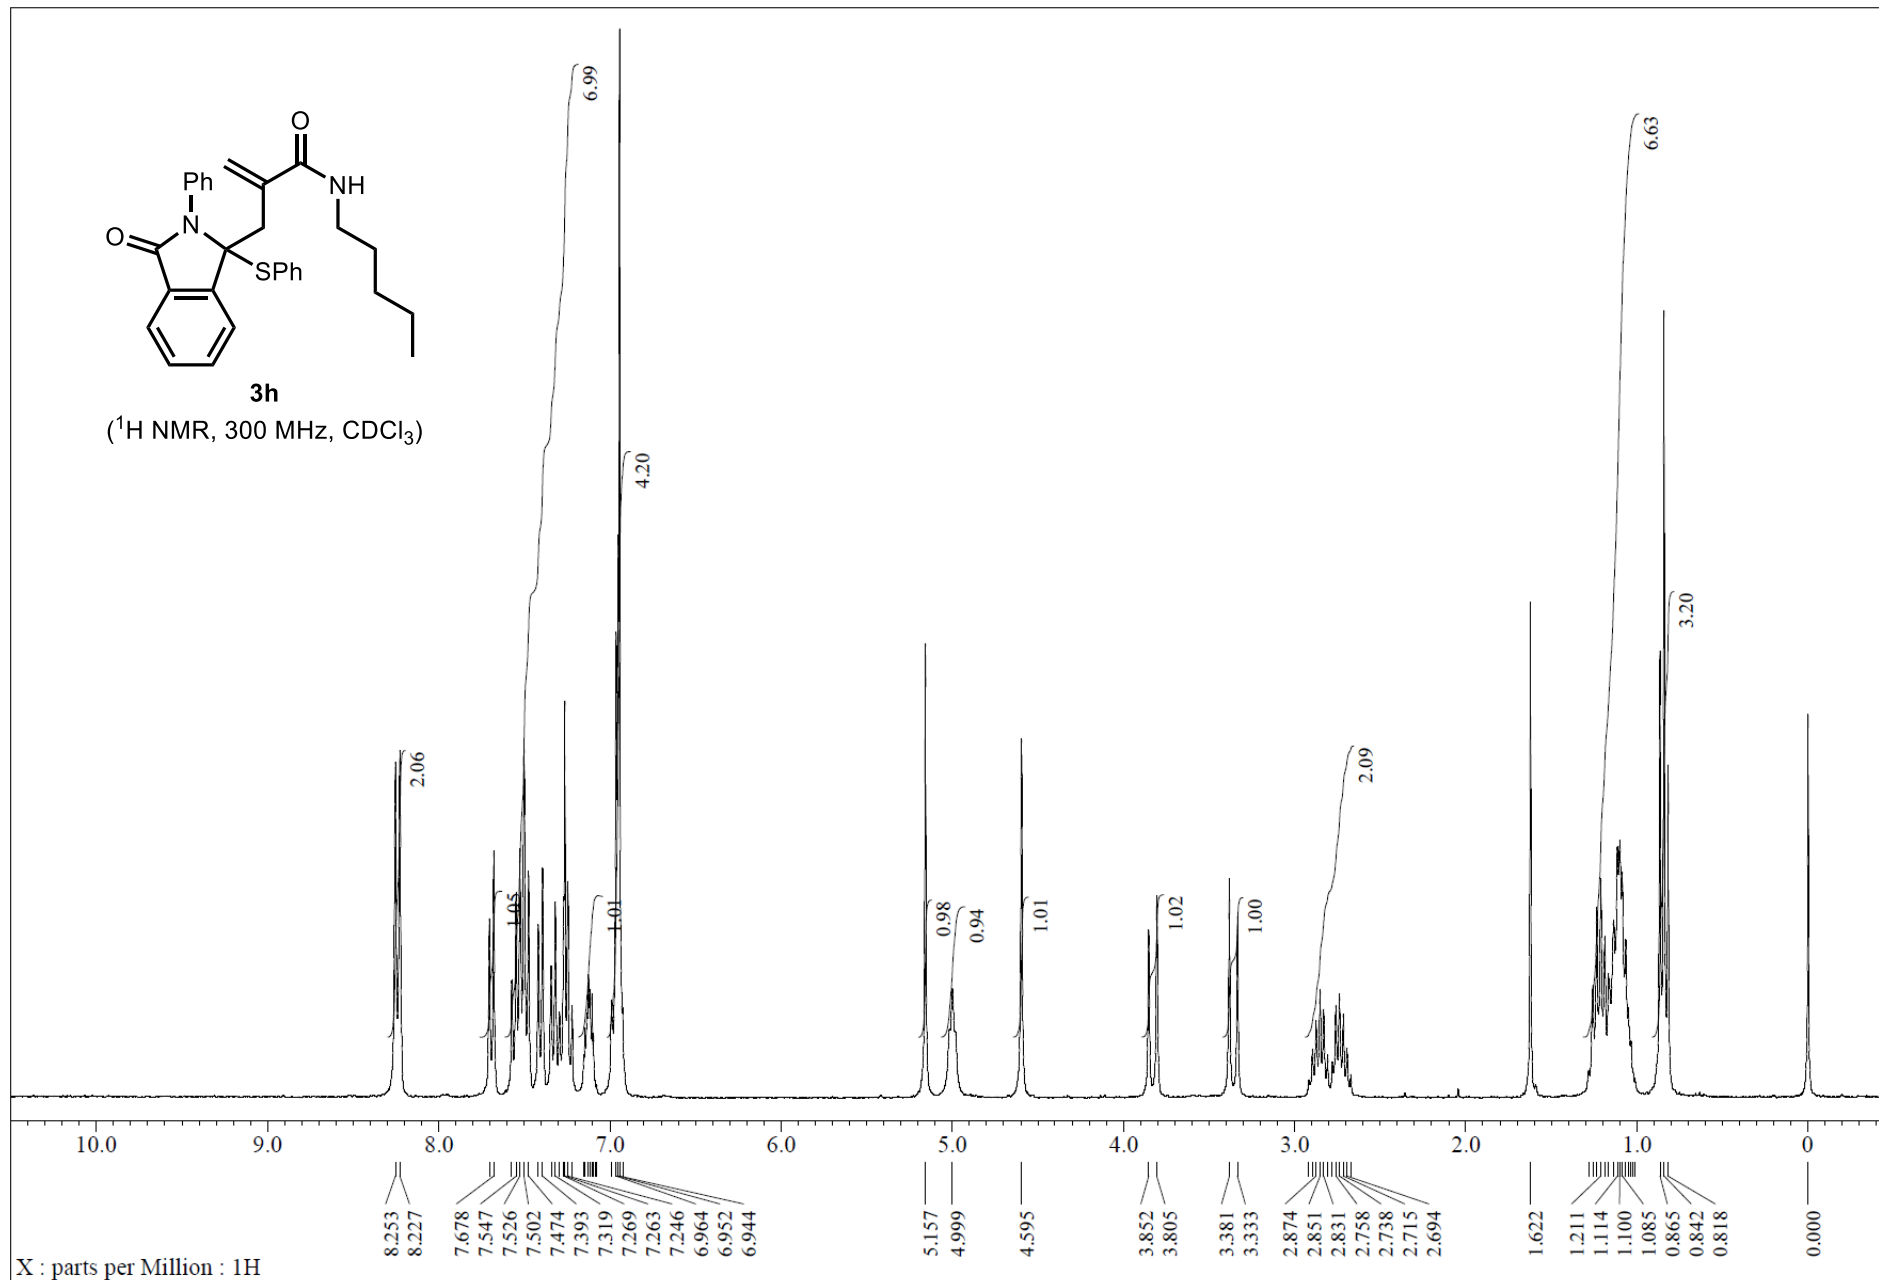

X : parts per Million :  $^1\text{H}$

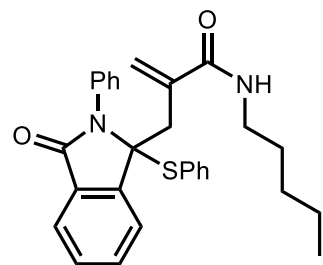

**3h**

( $^{13}\text{C}$  NMR, 75 MHz,  $\text{CDCl}_3$ )

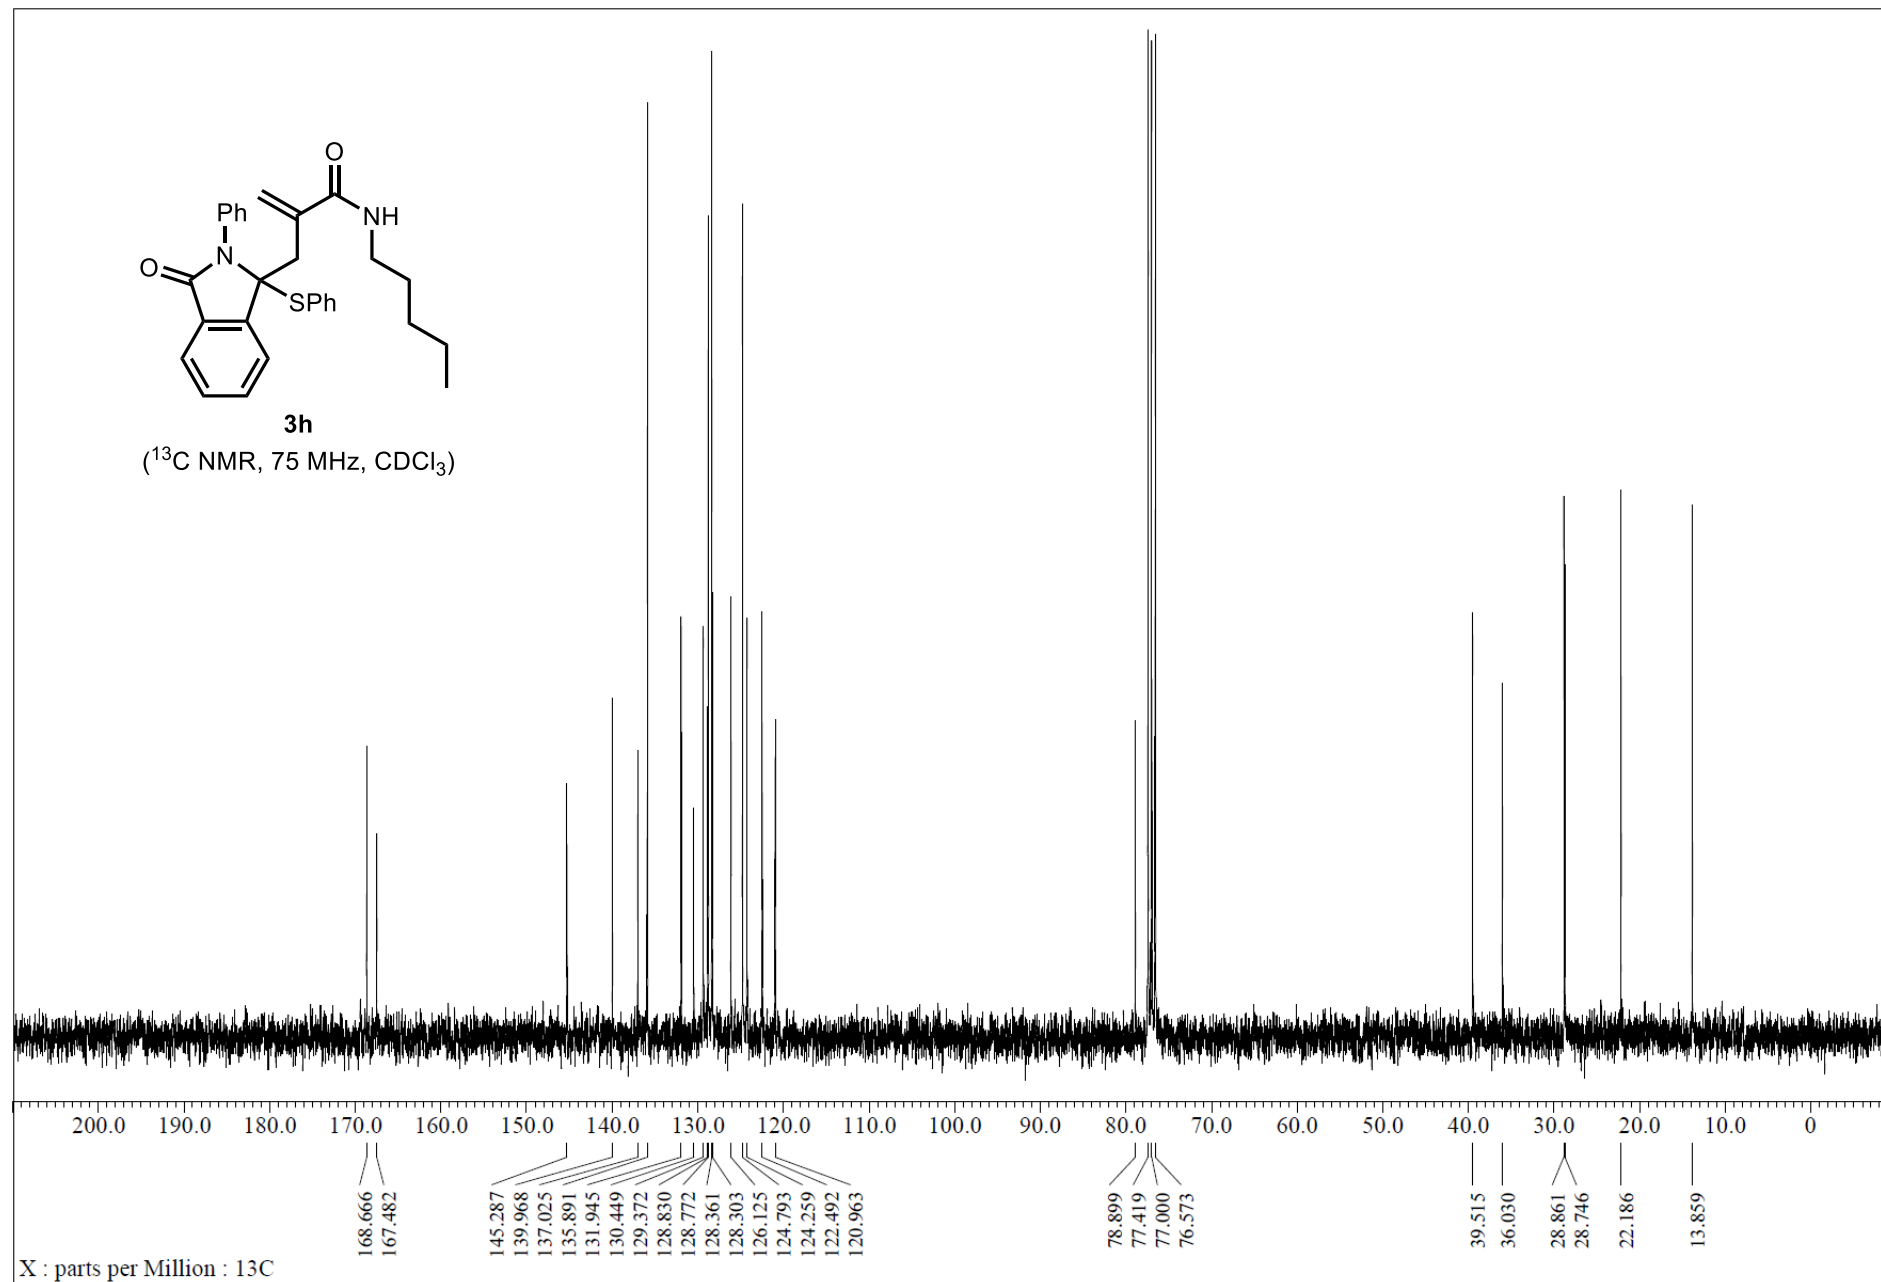

X : parts per Million :  $^{13}\text{C}$

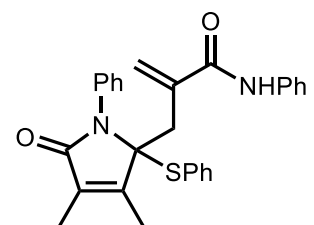

**3i**

(<sup>1</sup>H NMR, 300 MHz, CDCl<sub>3</sub>)

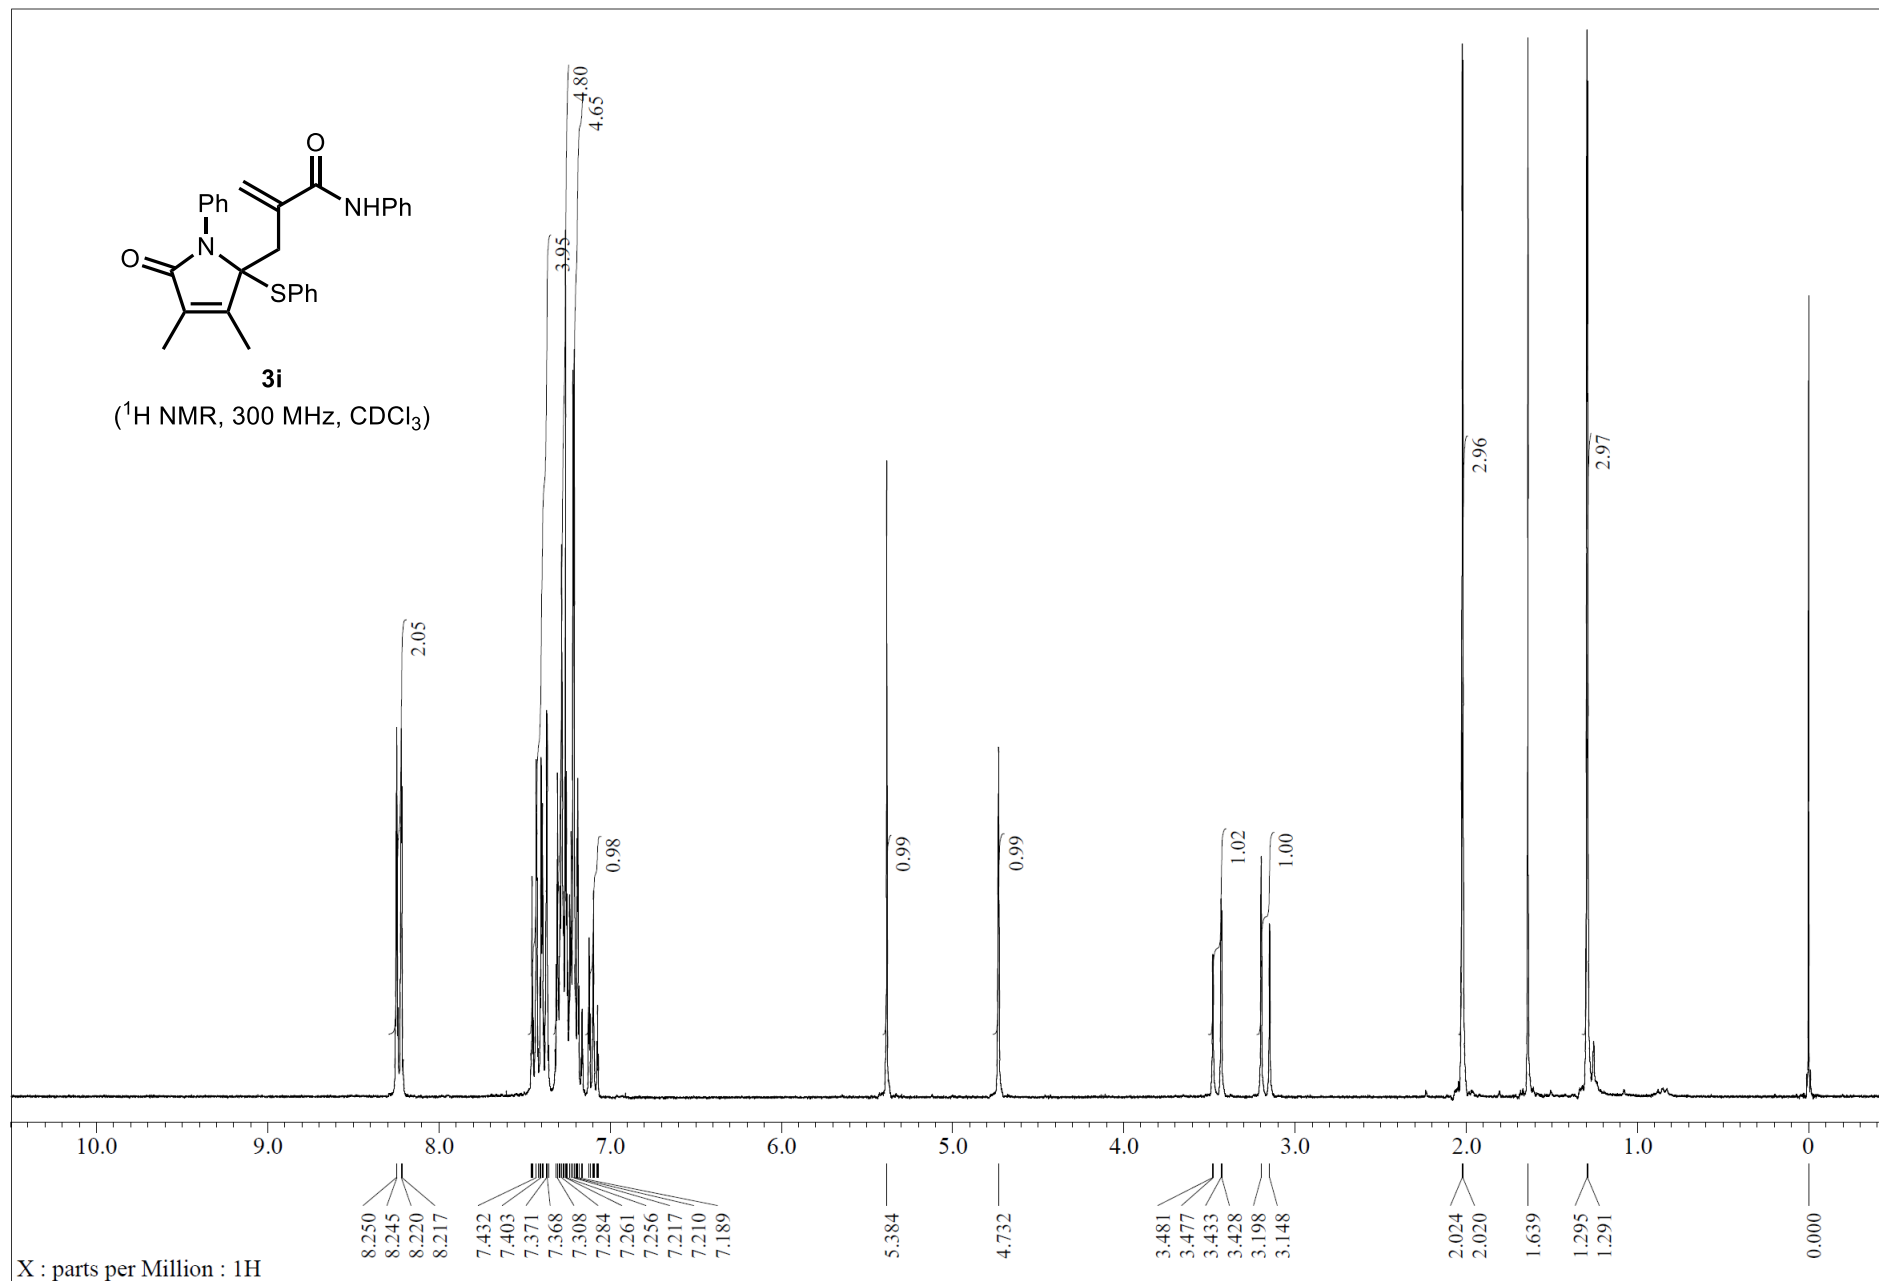

X : parts per Million : 1H

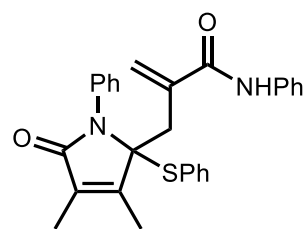

**3i**

( $^{13}\text{C}$  NMR, 75 MHz,  $\text{CDCl}_3$ )

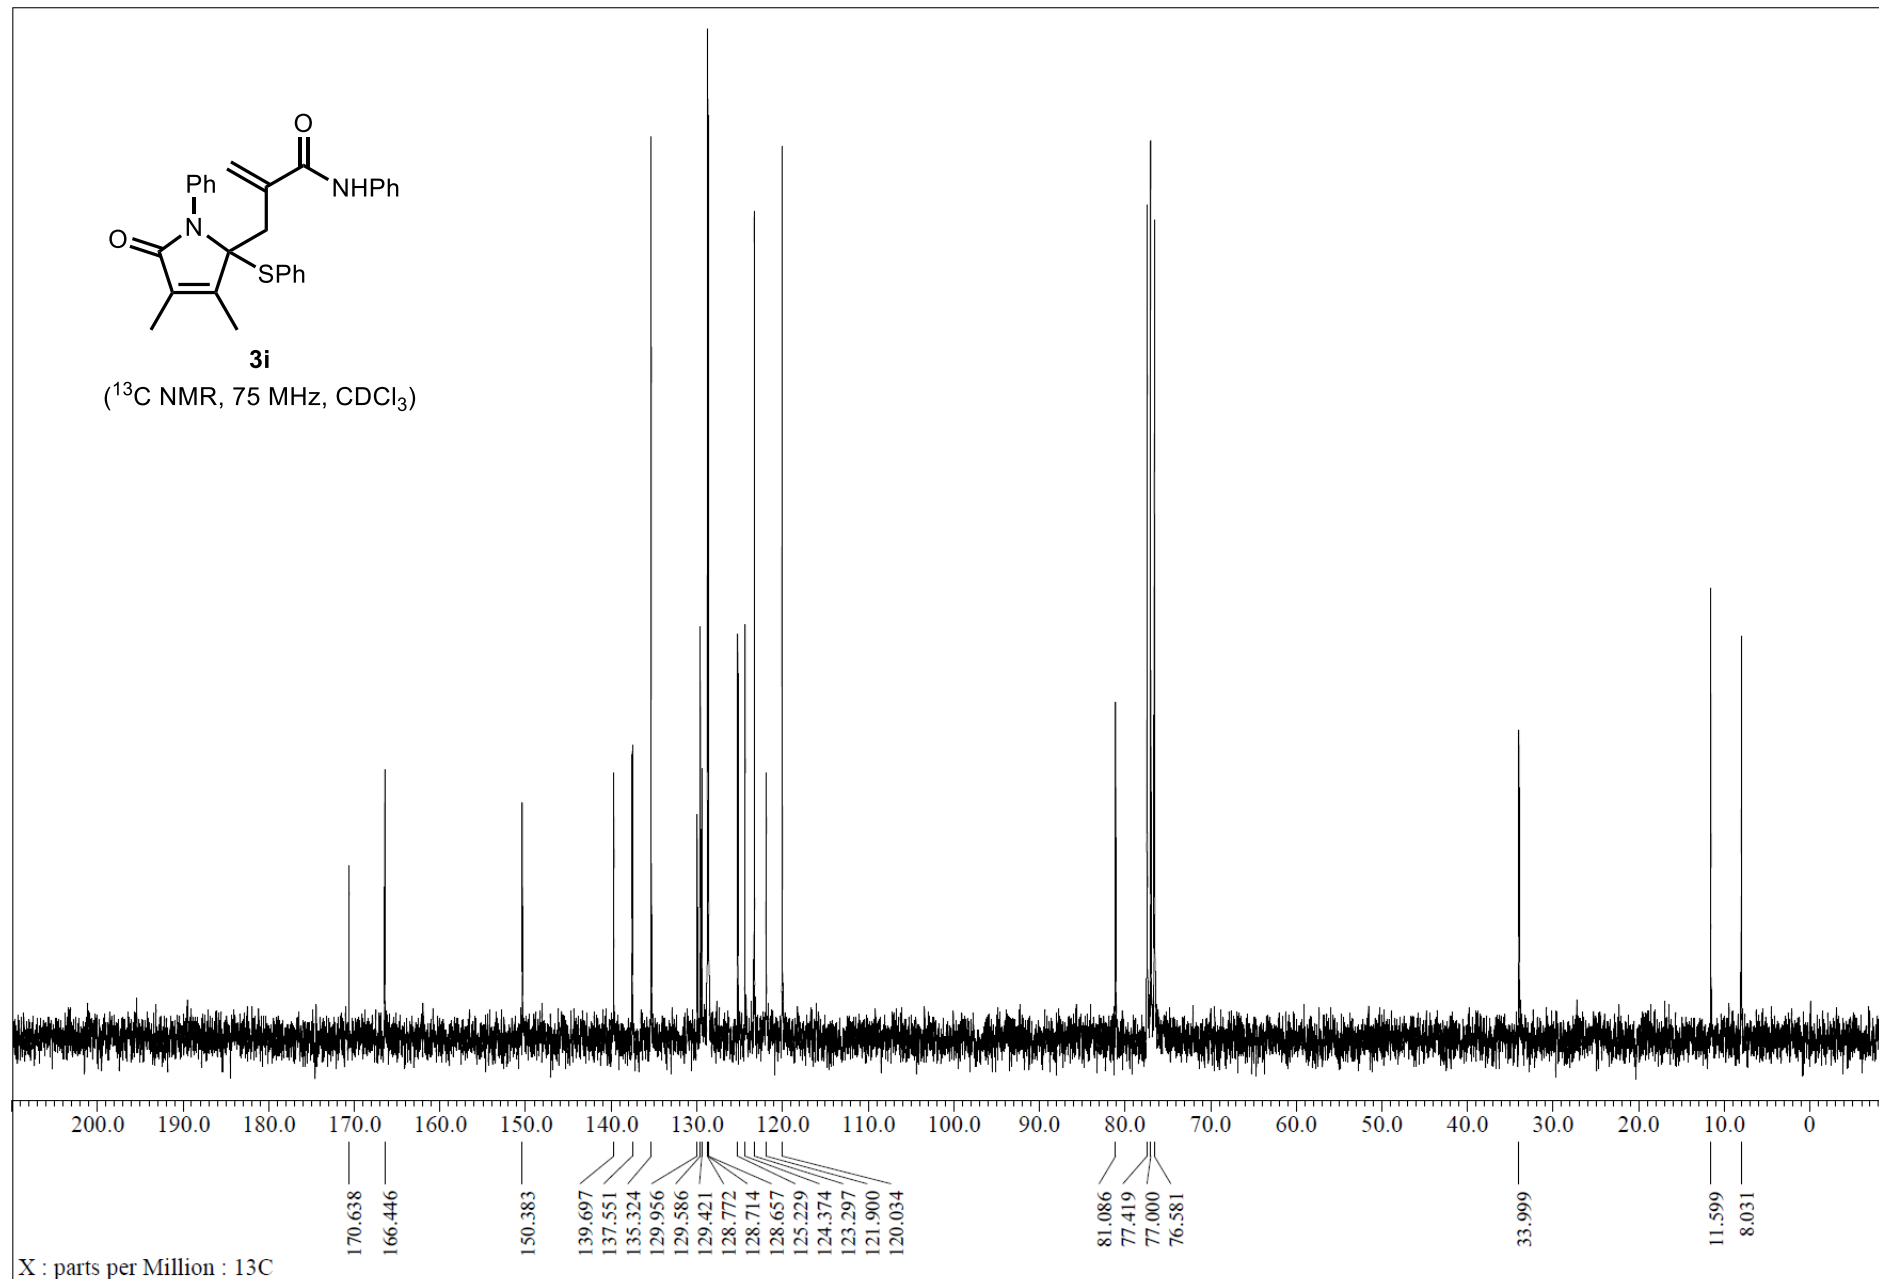

X : parts per Million :  $^{13}\text{C}$



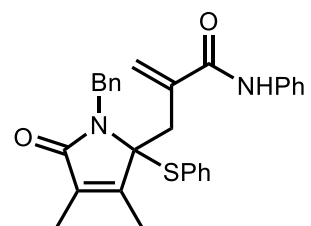

**3j**

(<sup>1</sup>H NMR, 300 MHz, CDCl<sub>3</sub>)

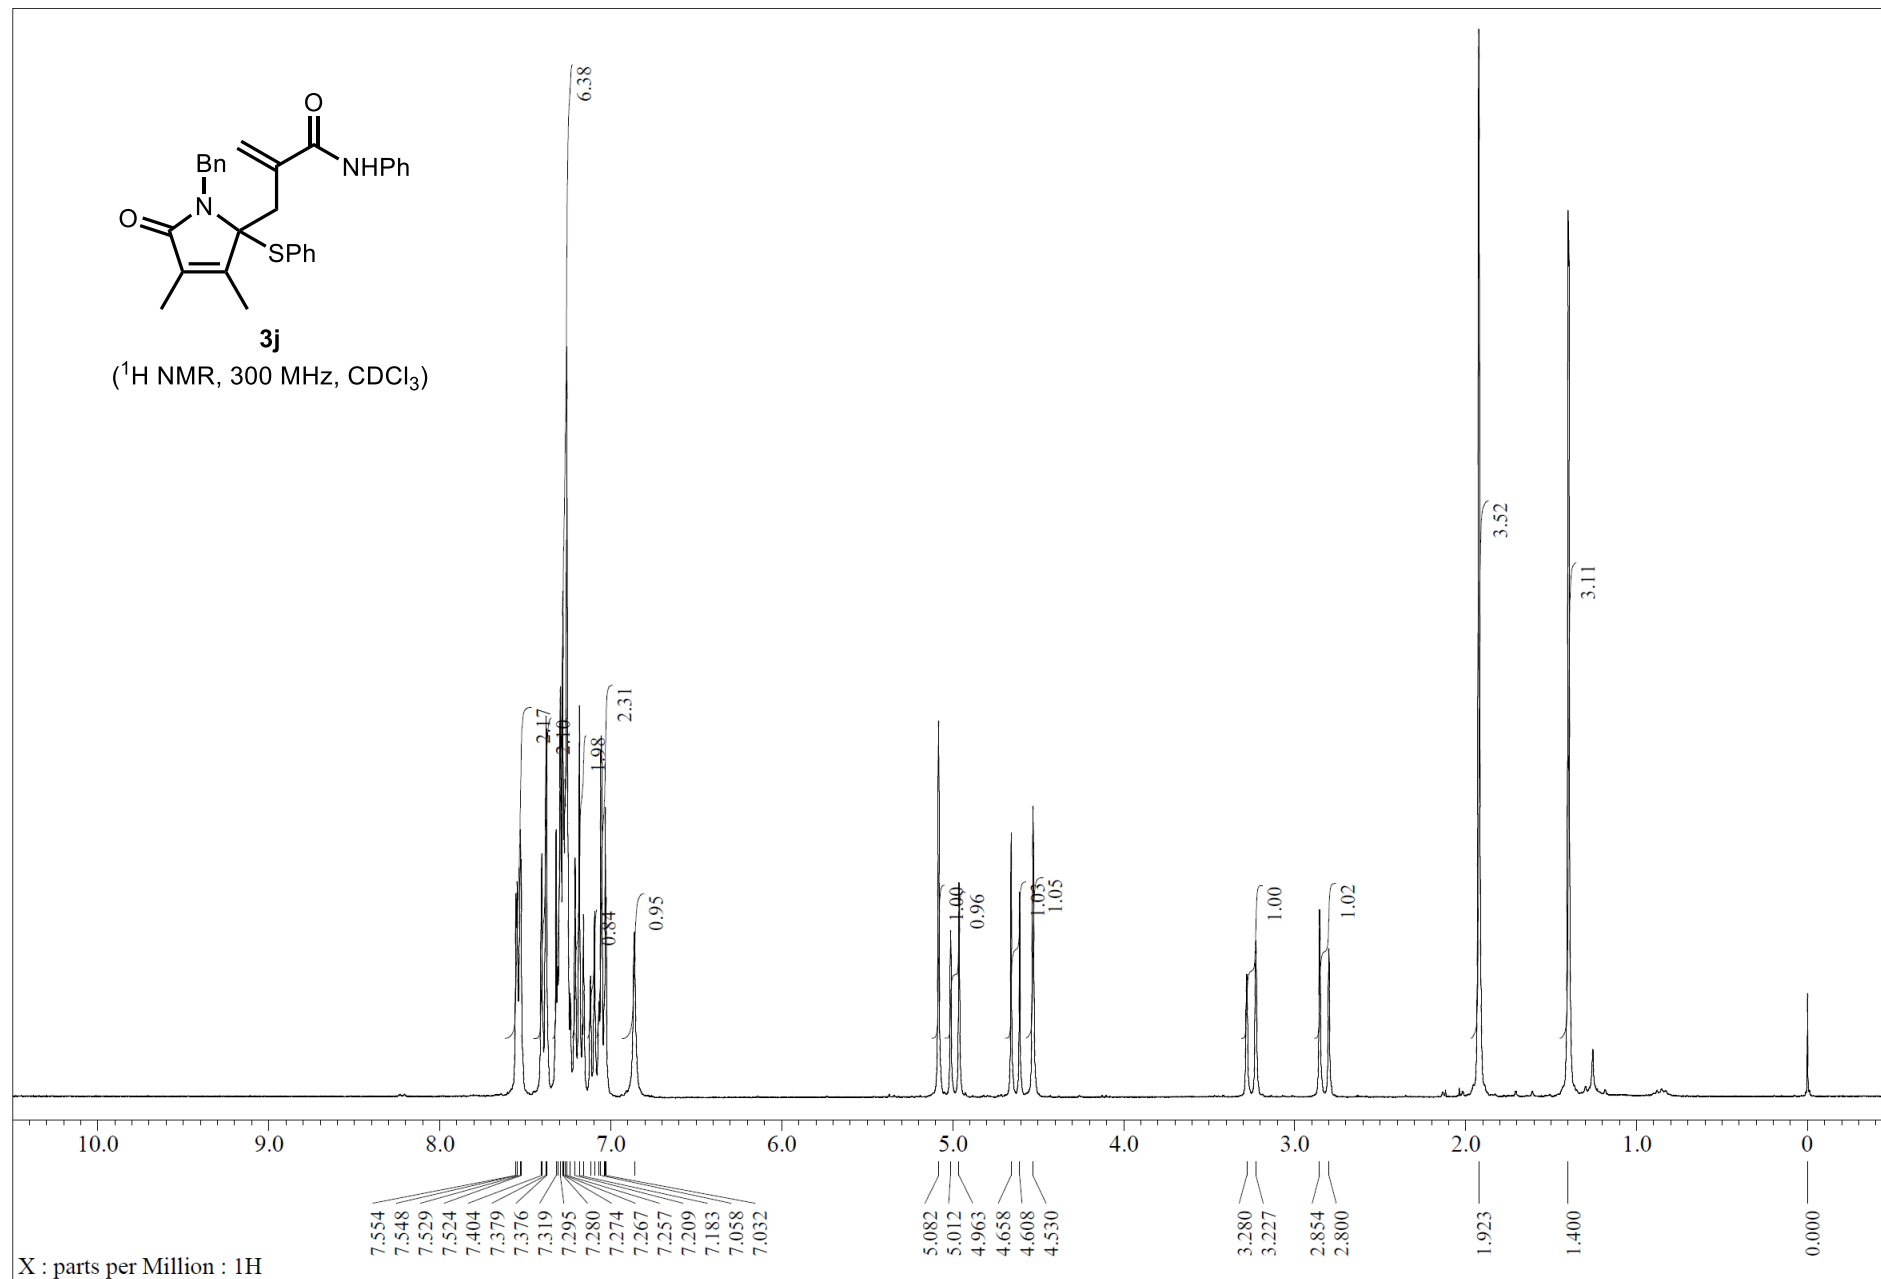

X : parts per Million : 1H

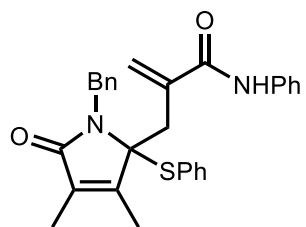

**3j**

( $^{13}\text{C}$  NMR, 75 MHz,  $\text{CDCl}_3$ )

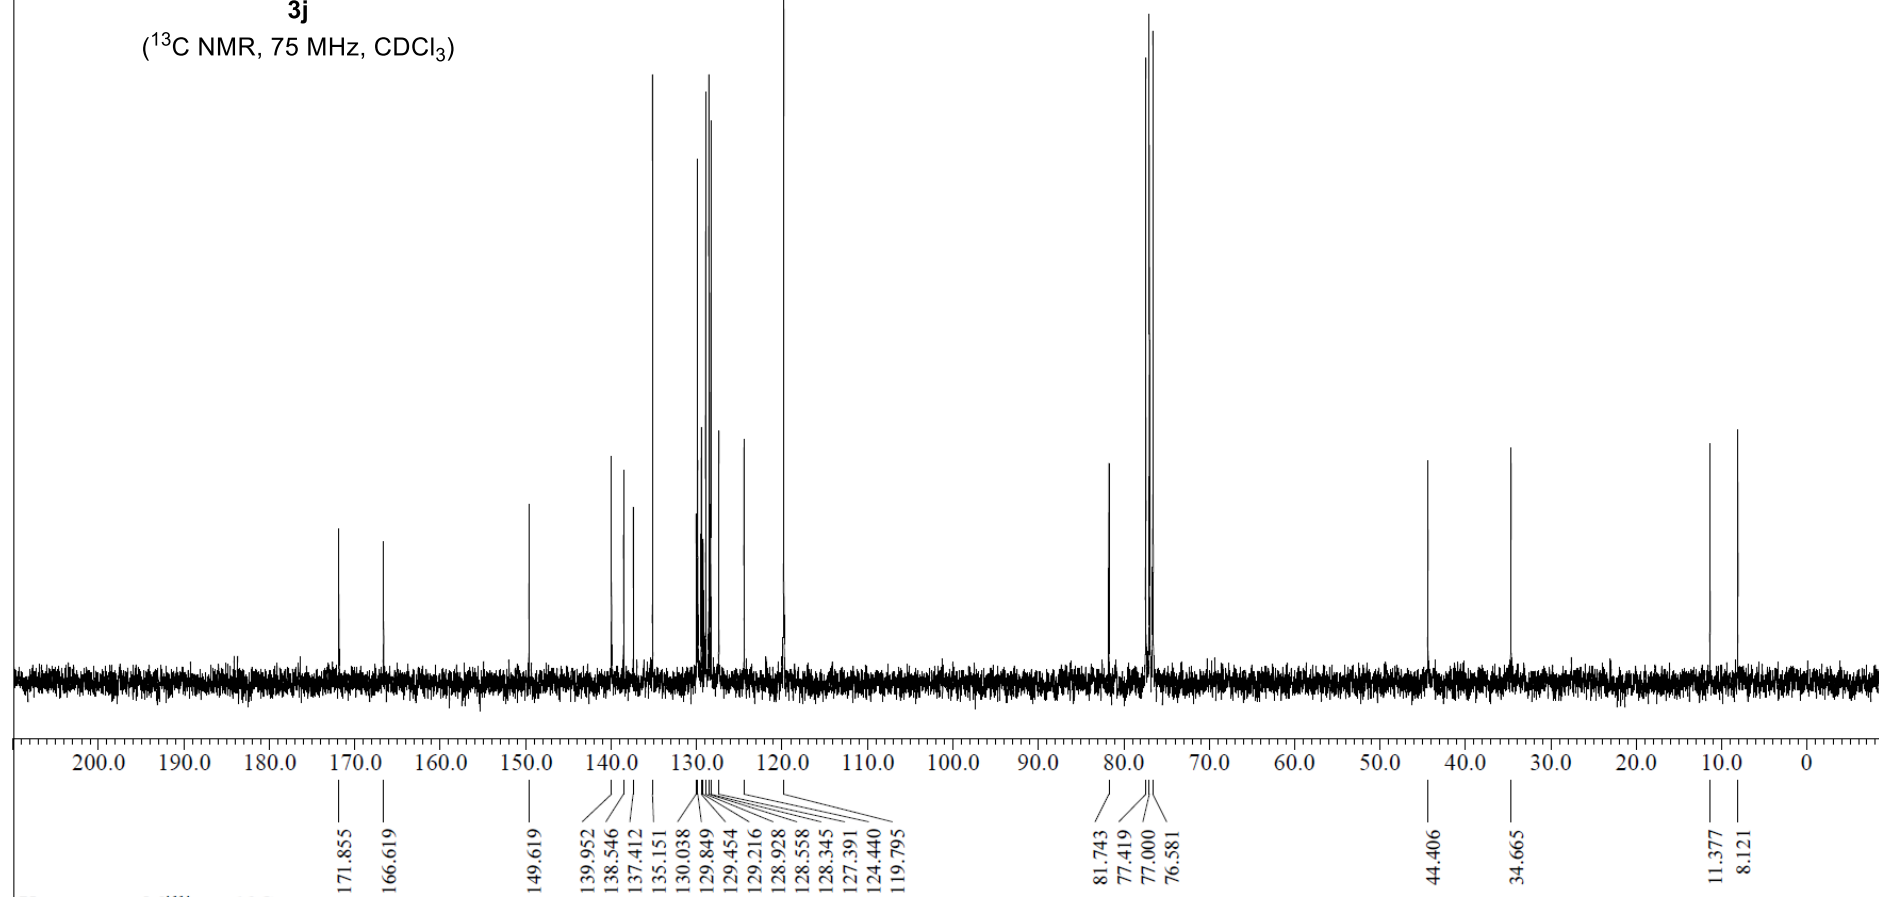

X : parts per Million :  $^{13}\text{C}$

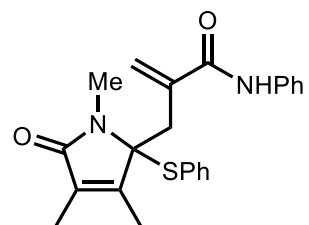

**3k**

( $^1\text{H}$  NMR, 300 MHz,  $\text{CDCl}_3$ )

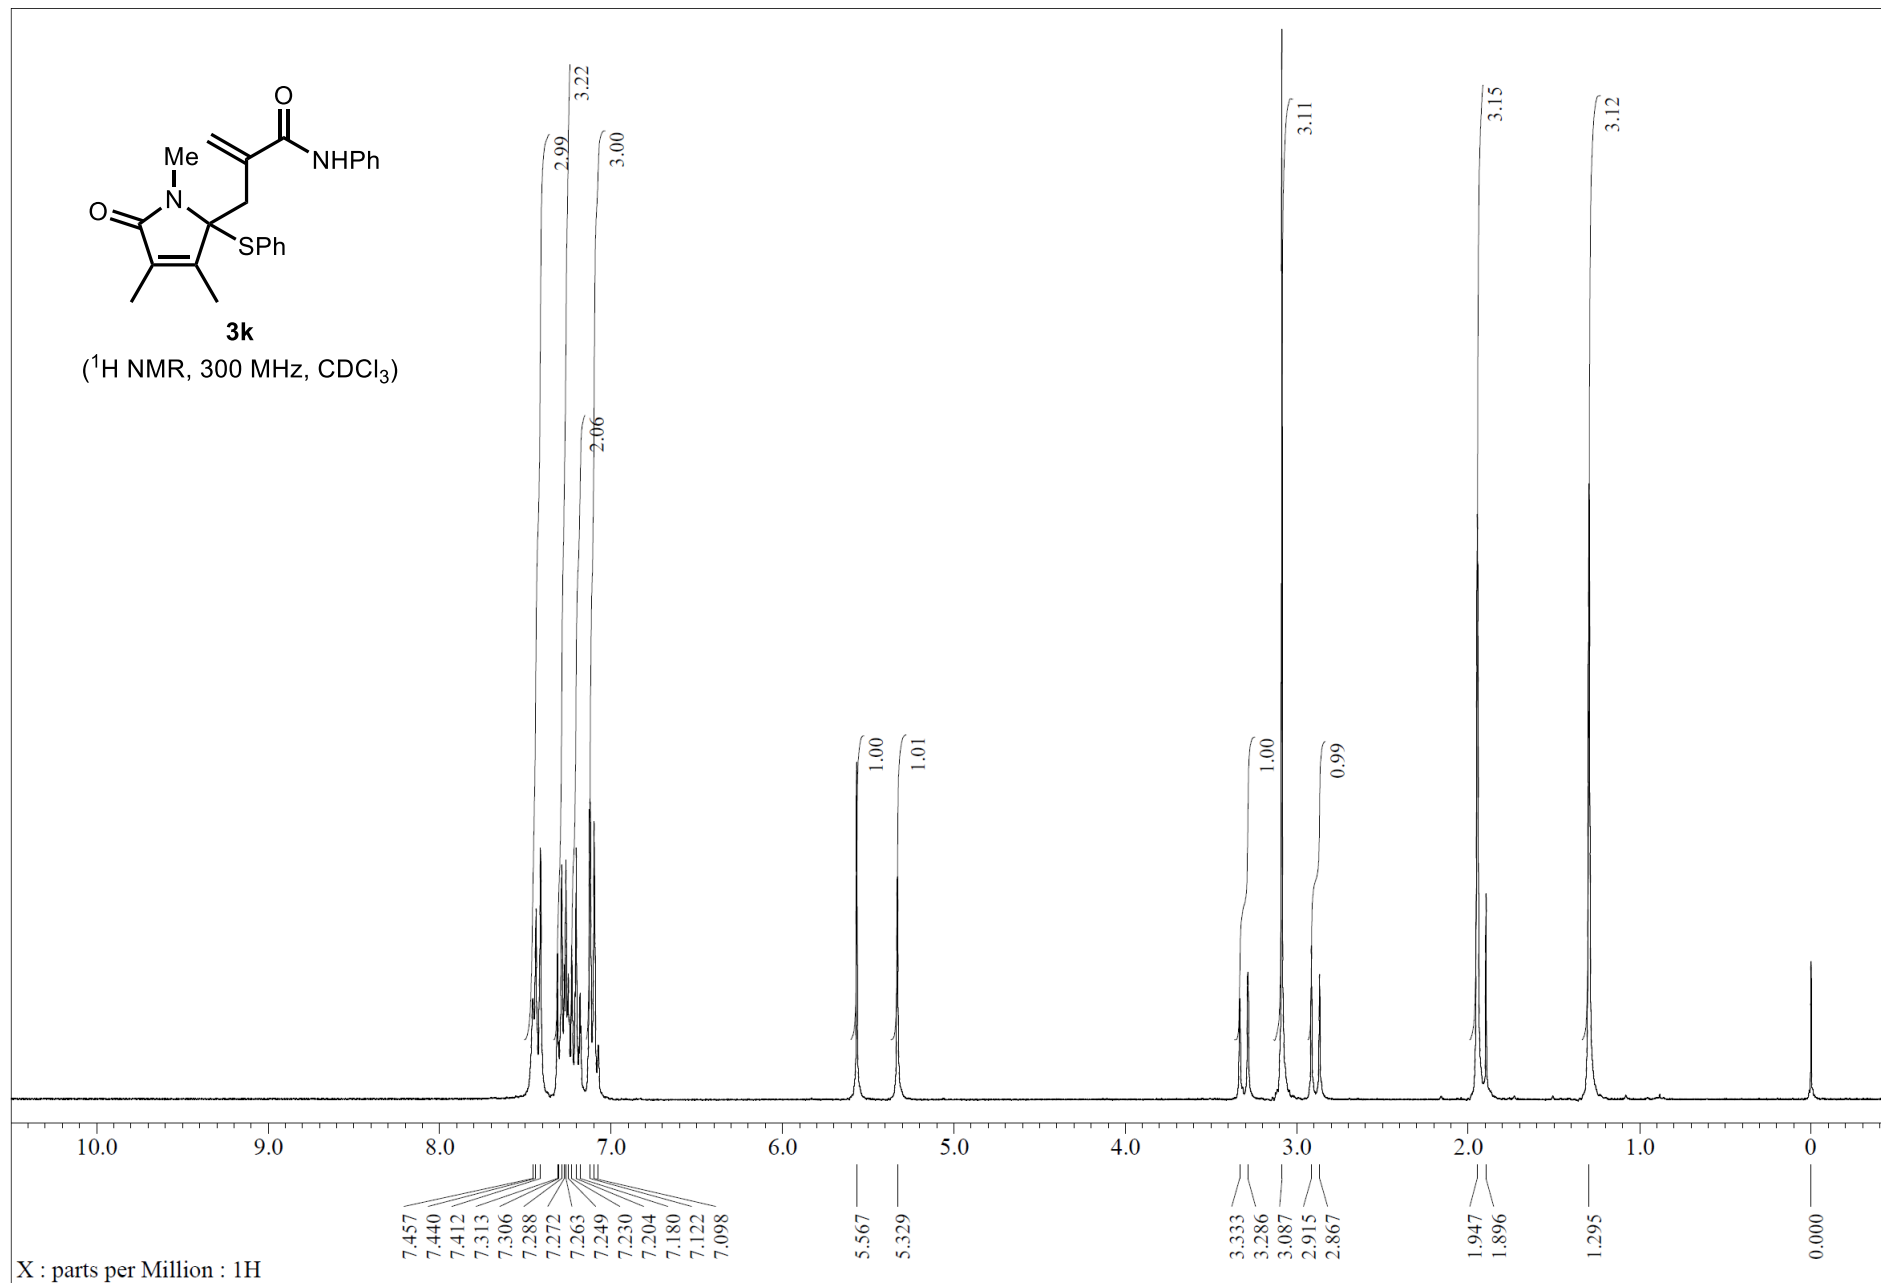

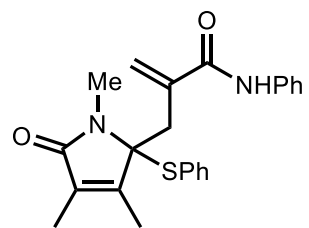

**3k**

( $^{13}\text{C}$  NMR, 75 MHz,  $\text{CDCl}_3$ )

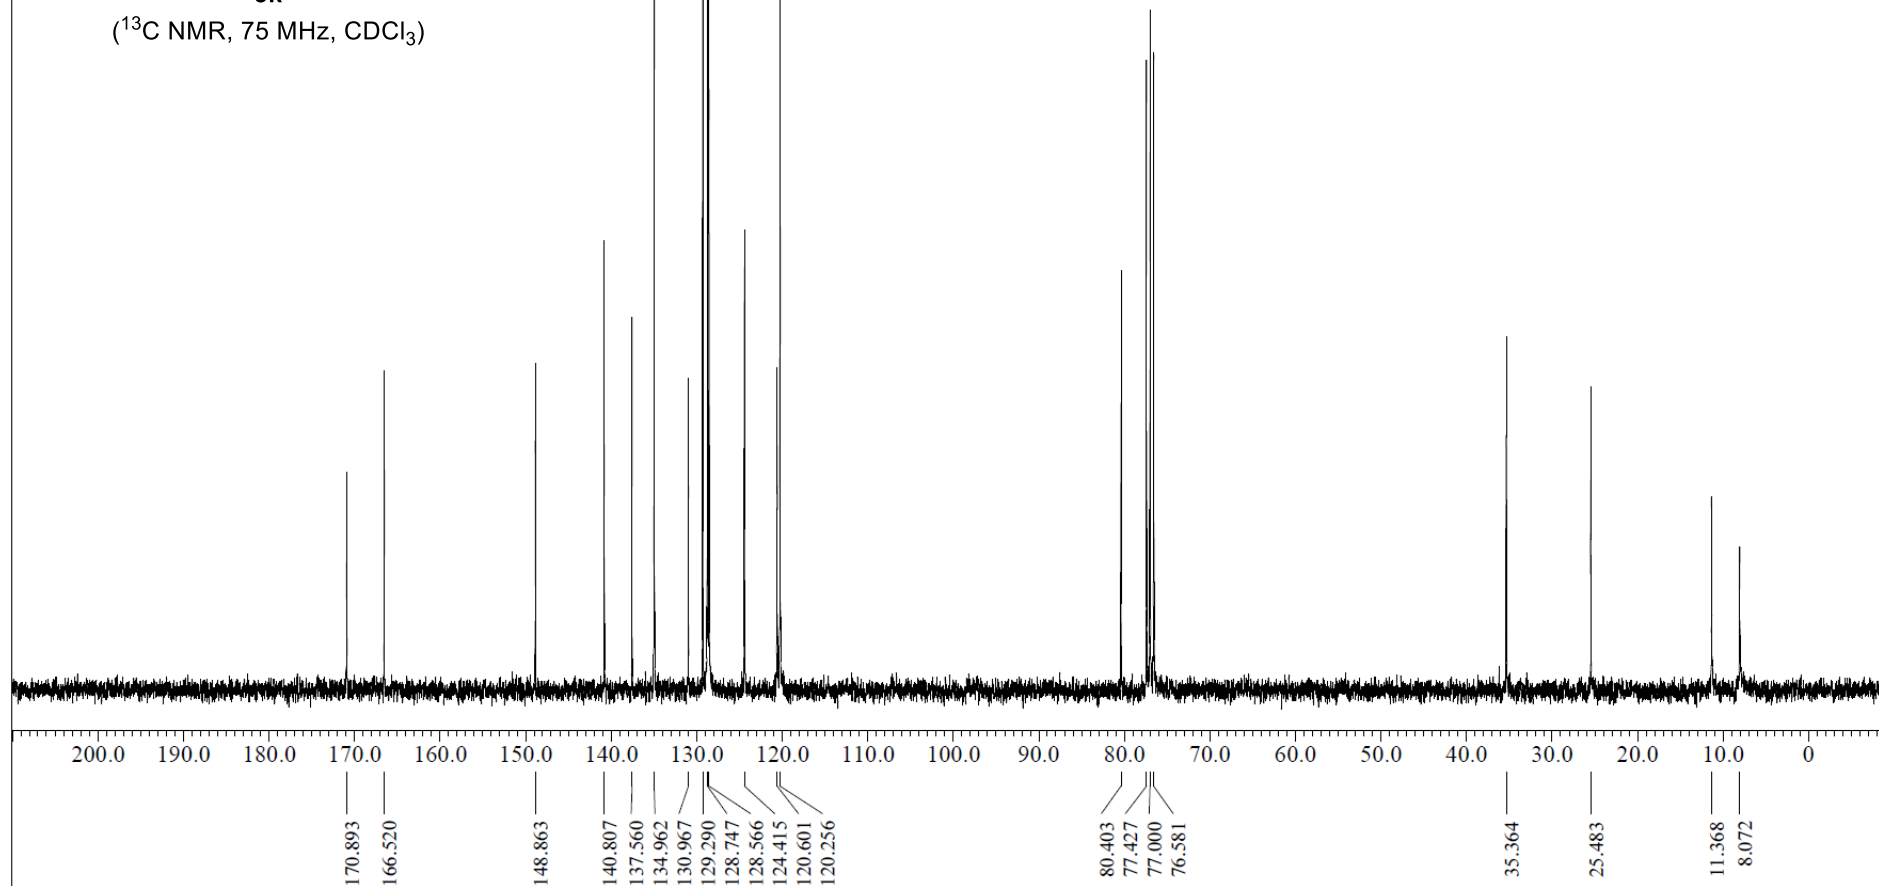

X : parts per Million :  $^{13}\text{C}$

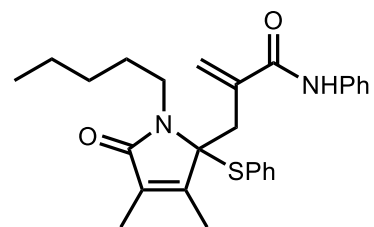

**3l**

(<sup>1</sup>H NMR, 300 MHz, CDCl<sub>3</sub>)

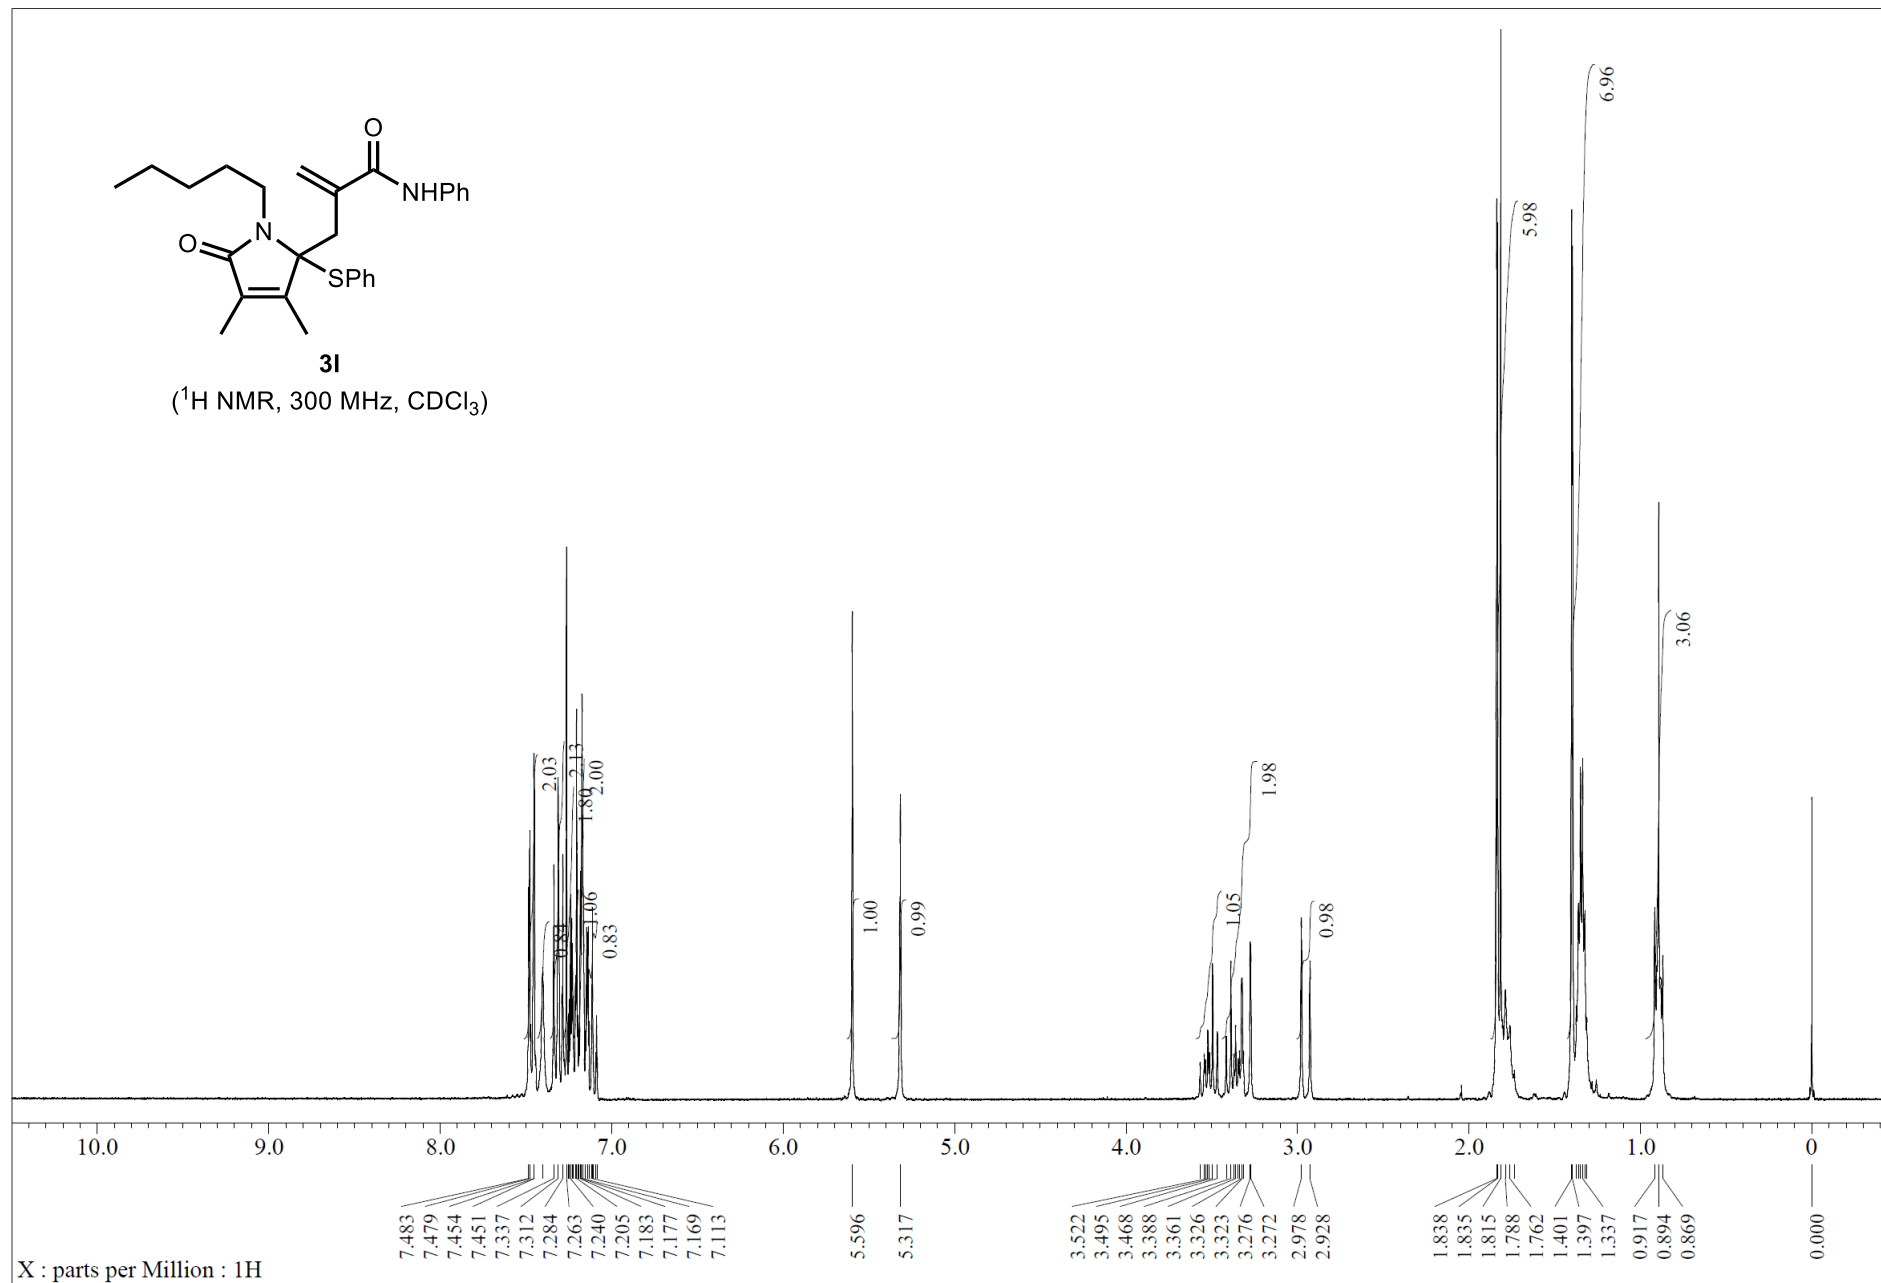

X : parts per Million : 1H

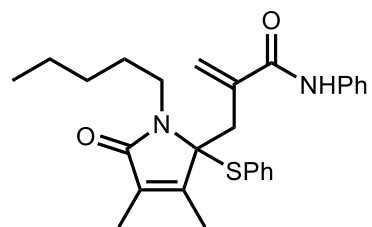

**3I**

( $^{13}\text{C}$  NMR, 75 MHz,  $\text{CDCl}_3$ )

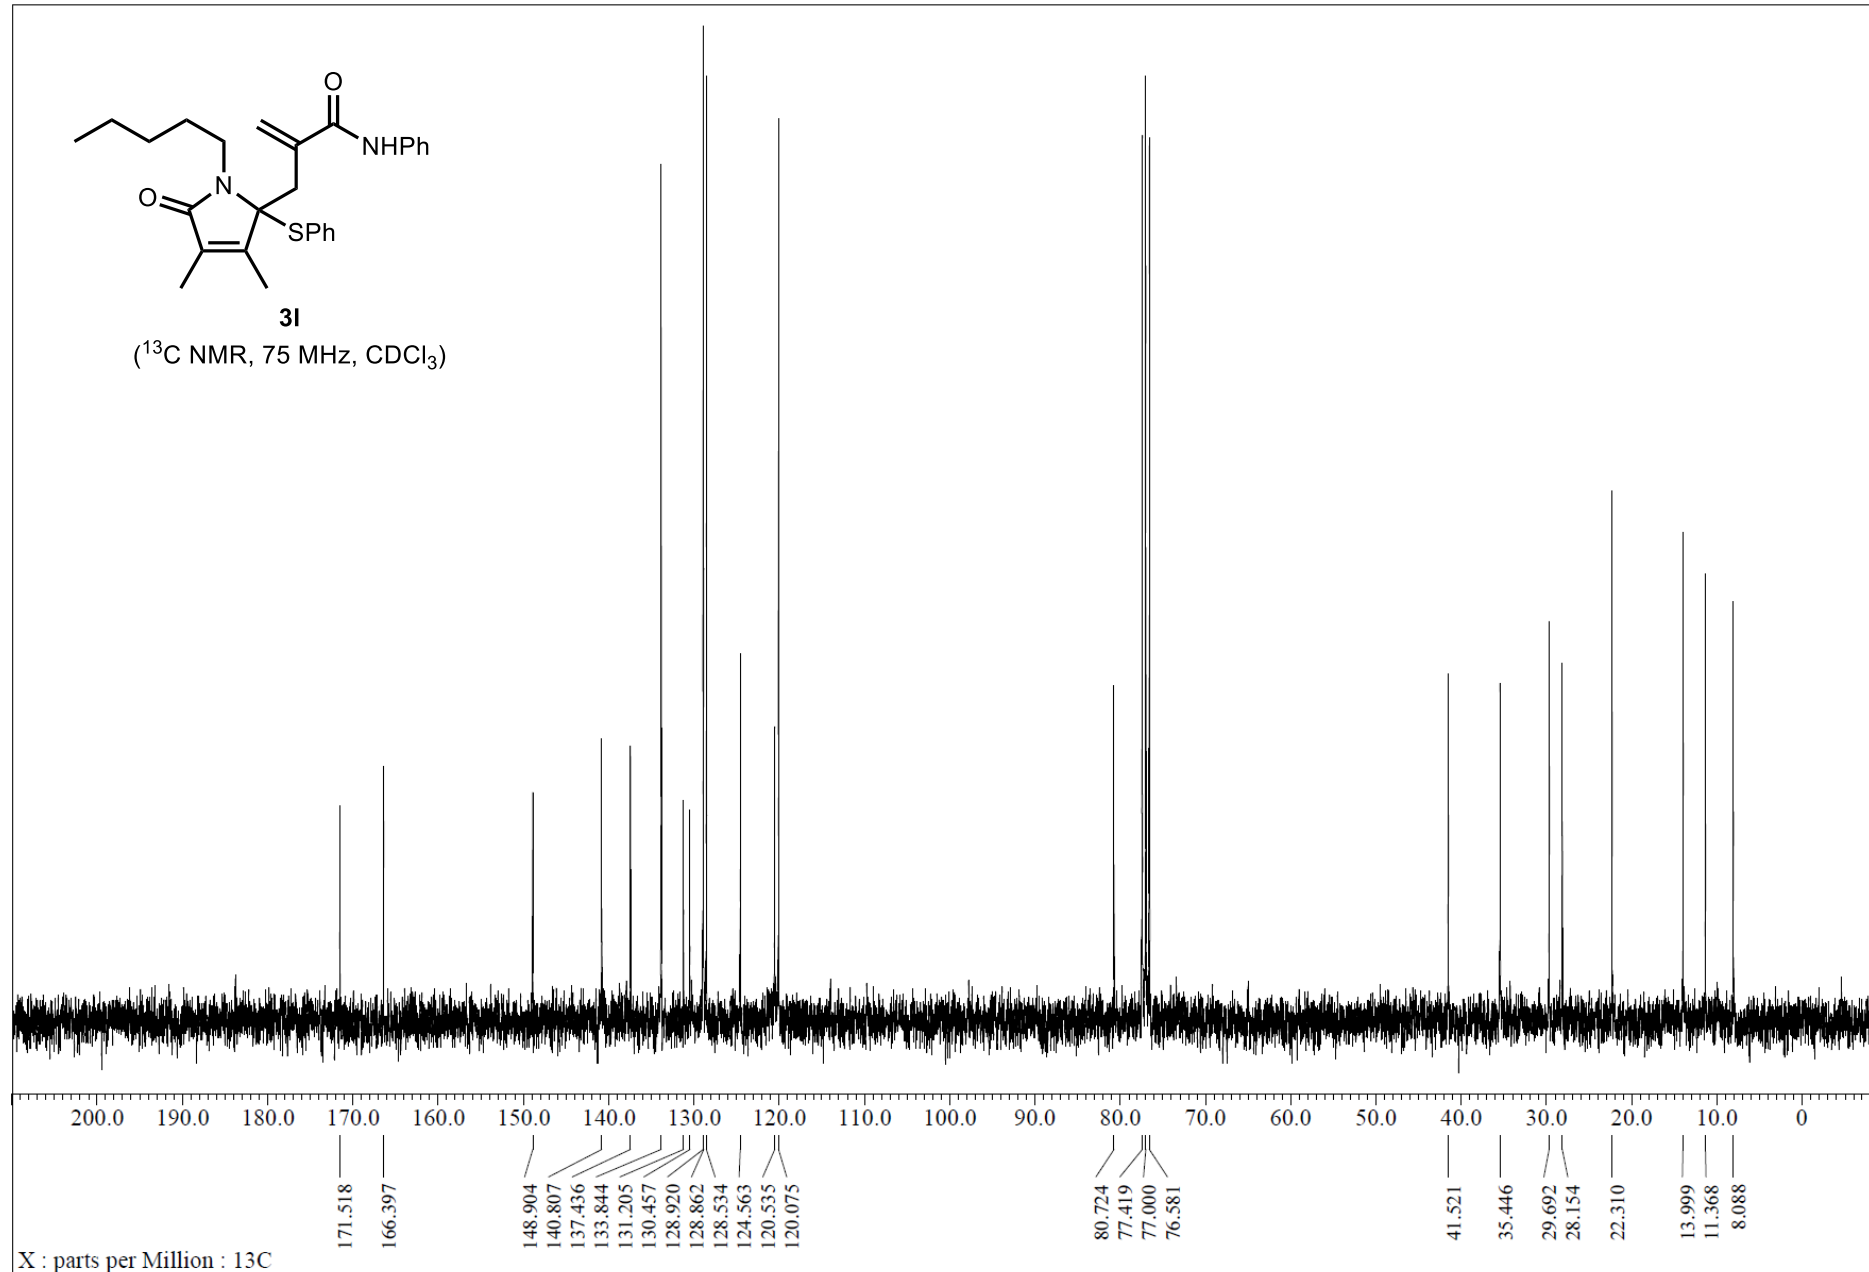

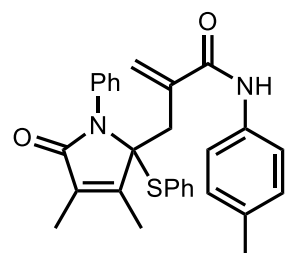

**3m**

(<sup>1</sup>H NMR, 300 MHz, CDCl<sub>3</sub>)

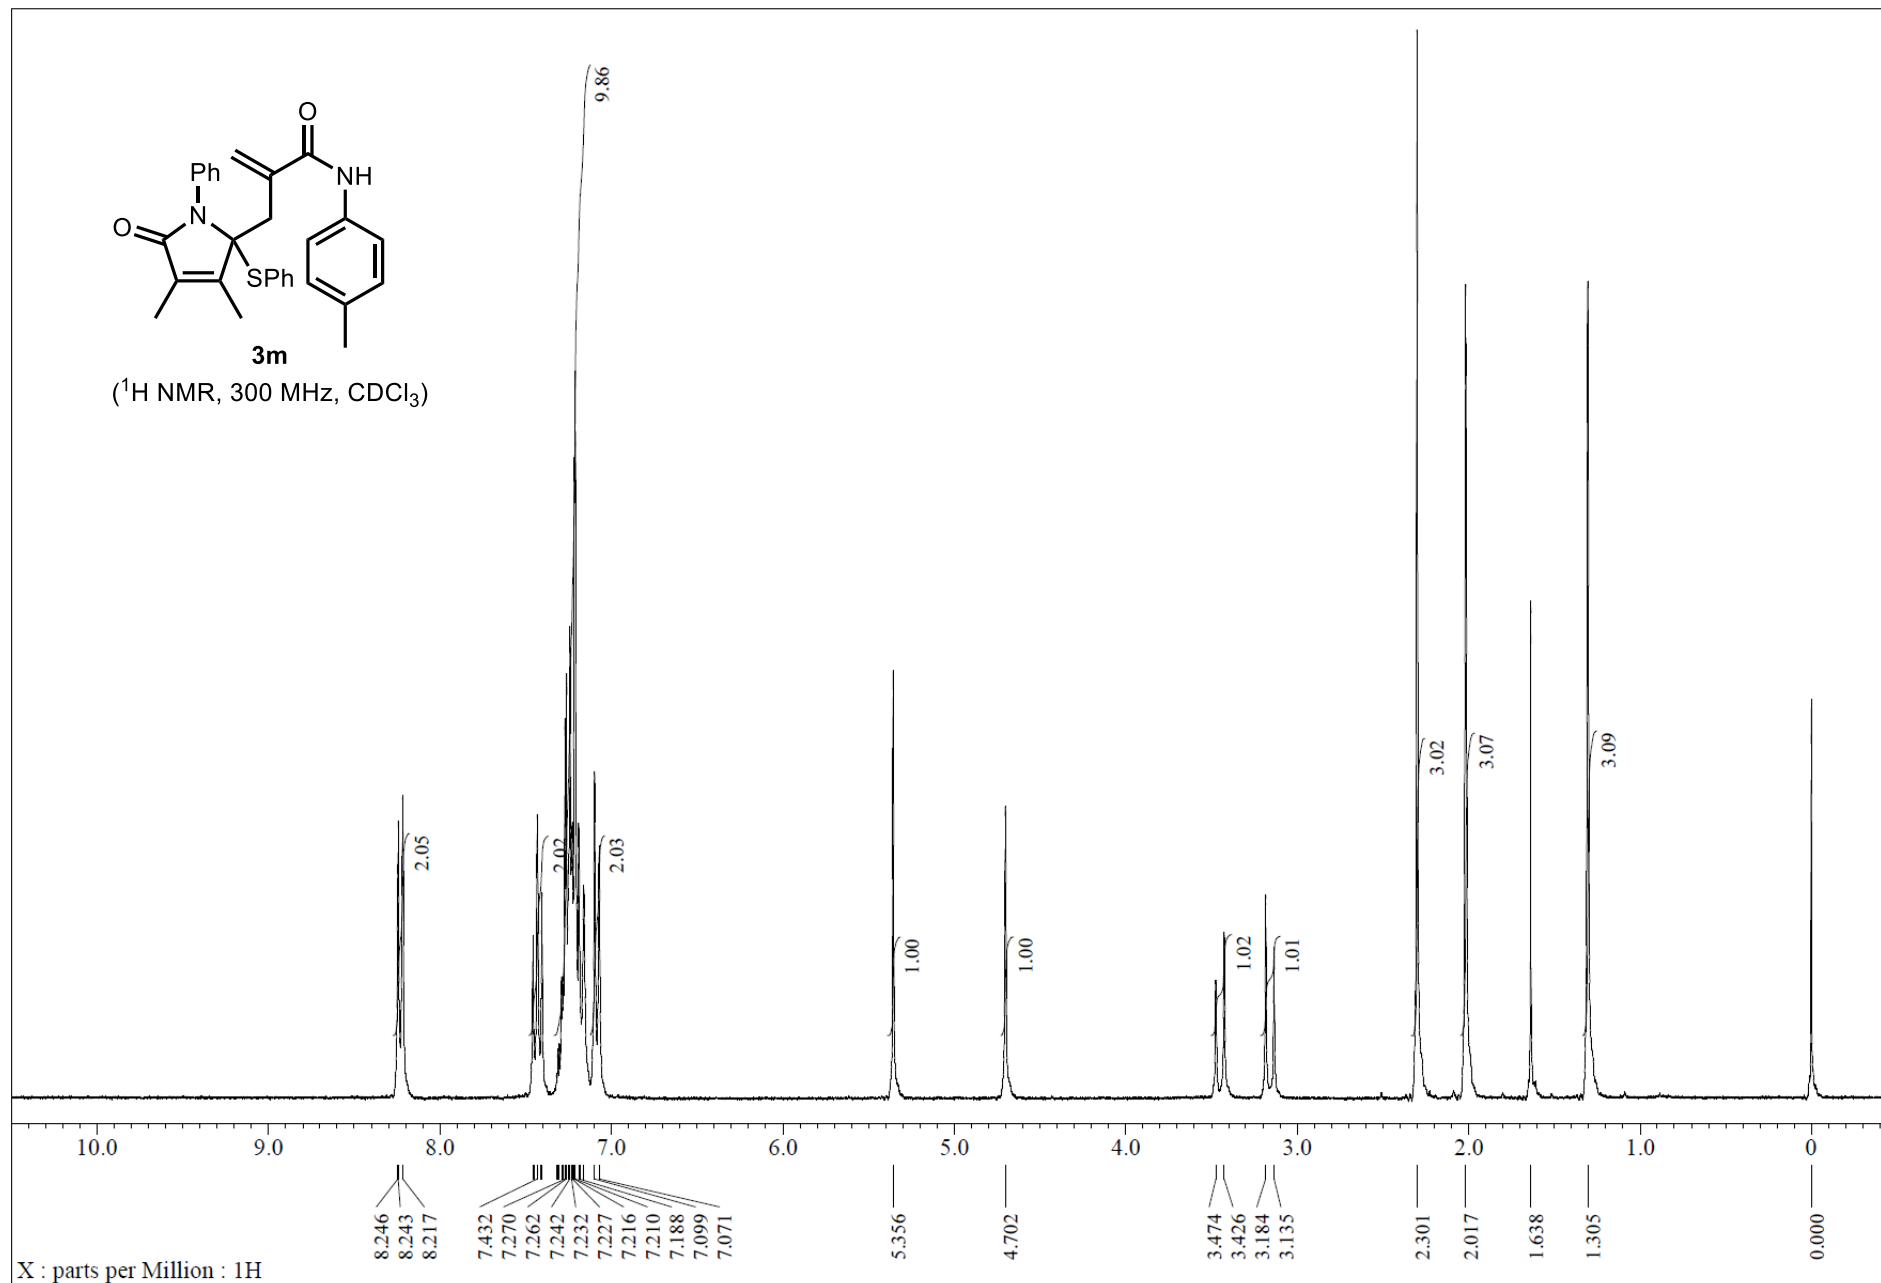

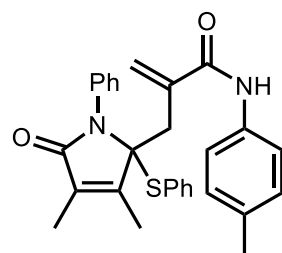

**3m**

( $^{13}\text{C}$  NMR, 75 MHz,  $\text{CDCl}_3$ )

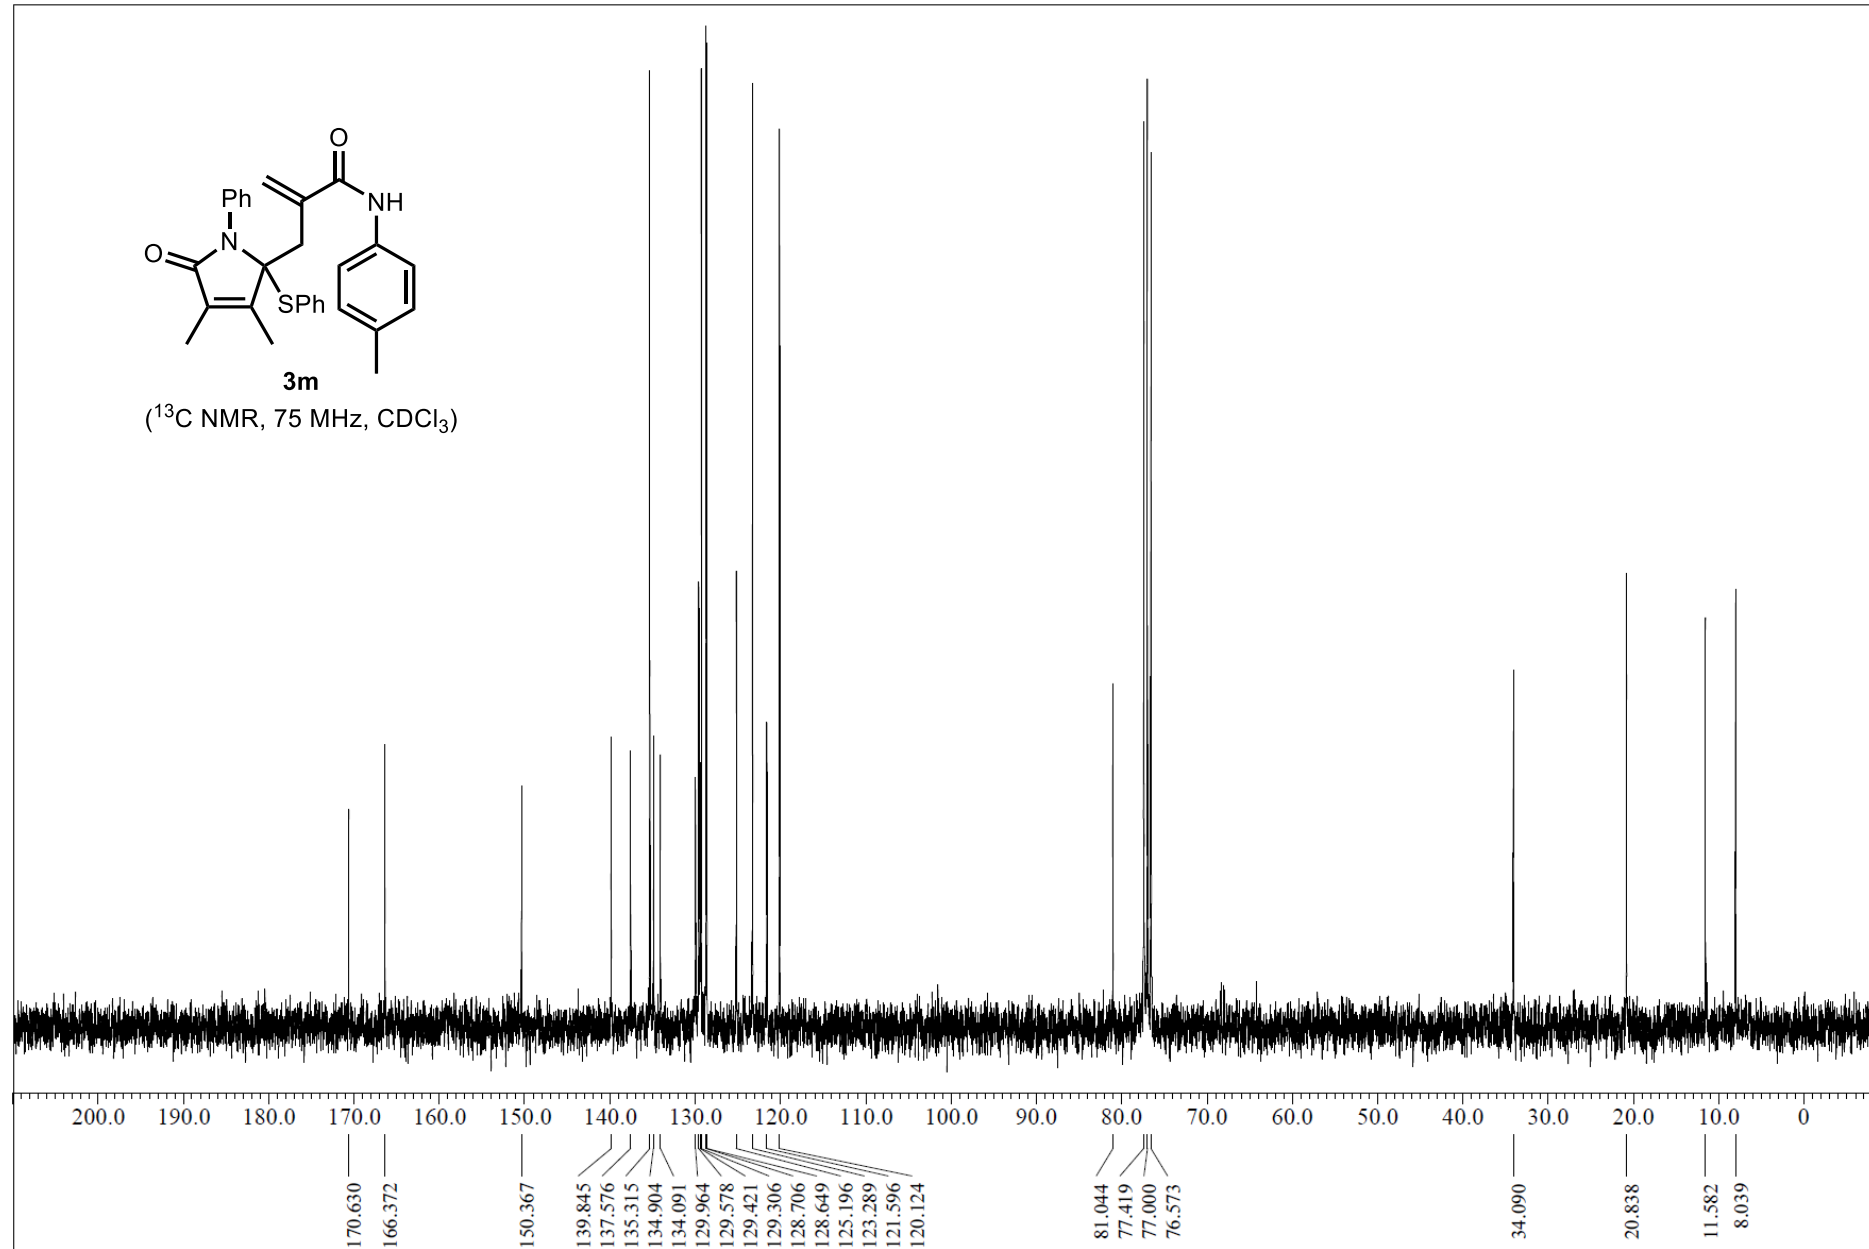

X : parts per Million :  $^{13}\text{C}$



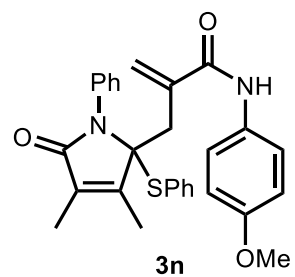

(<sup>1</sup>H NMR, 300 MHz, CDCl<sub>3</sub>)

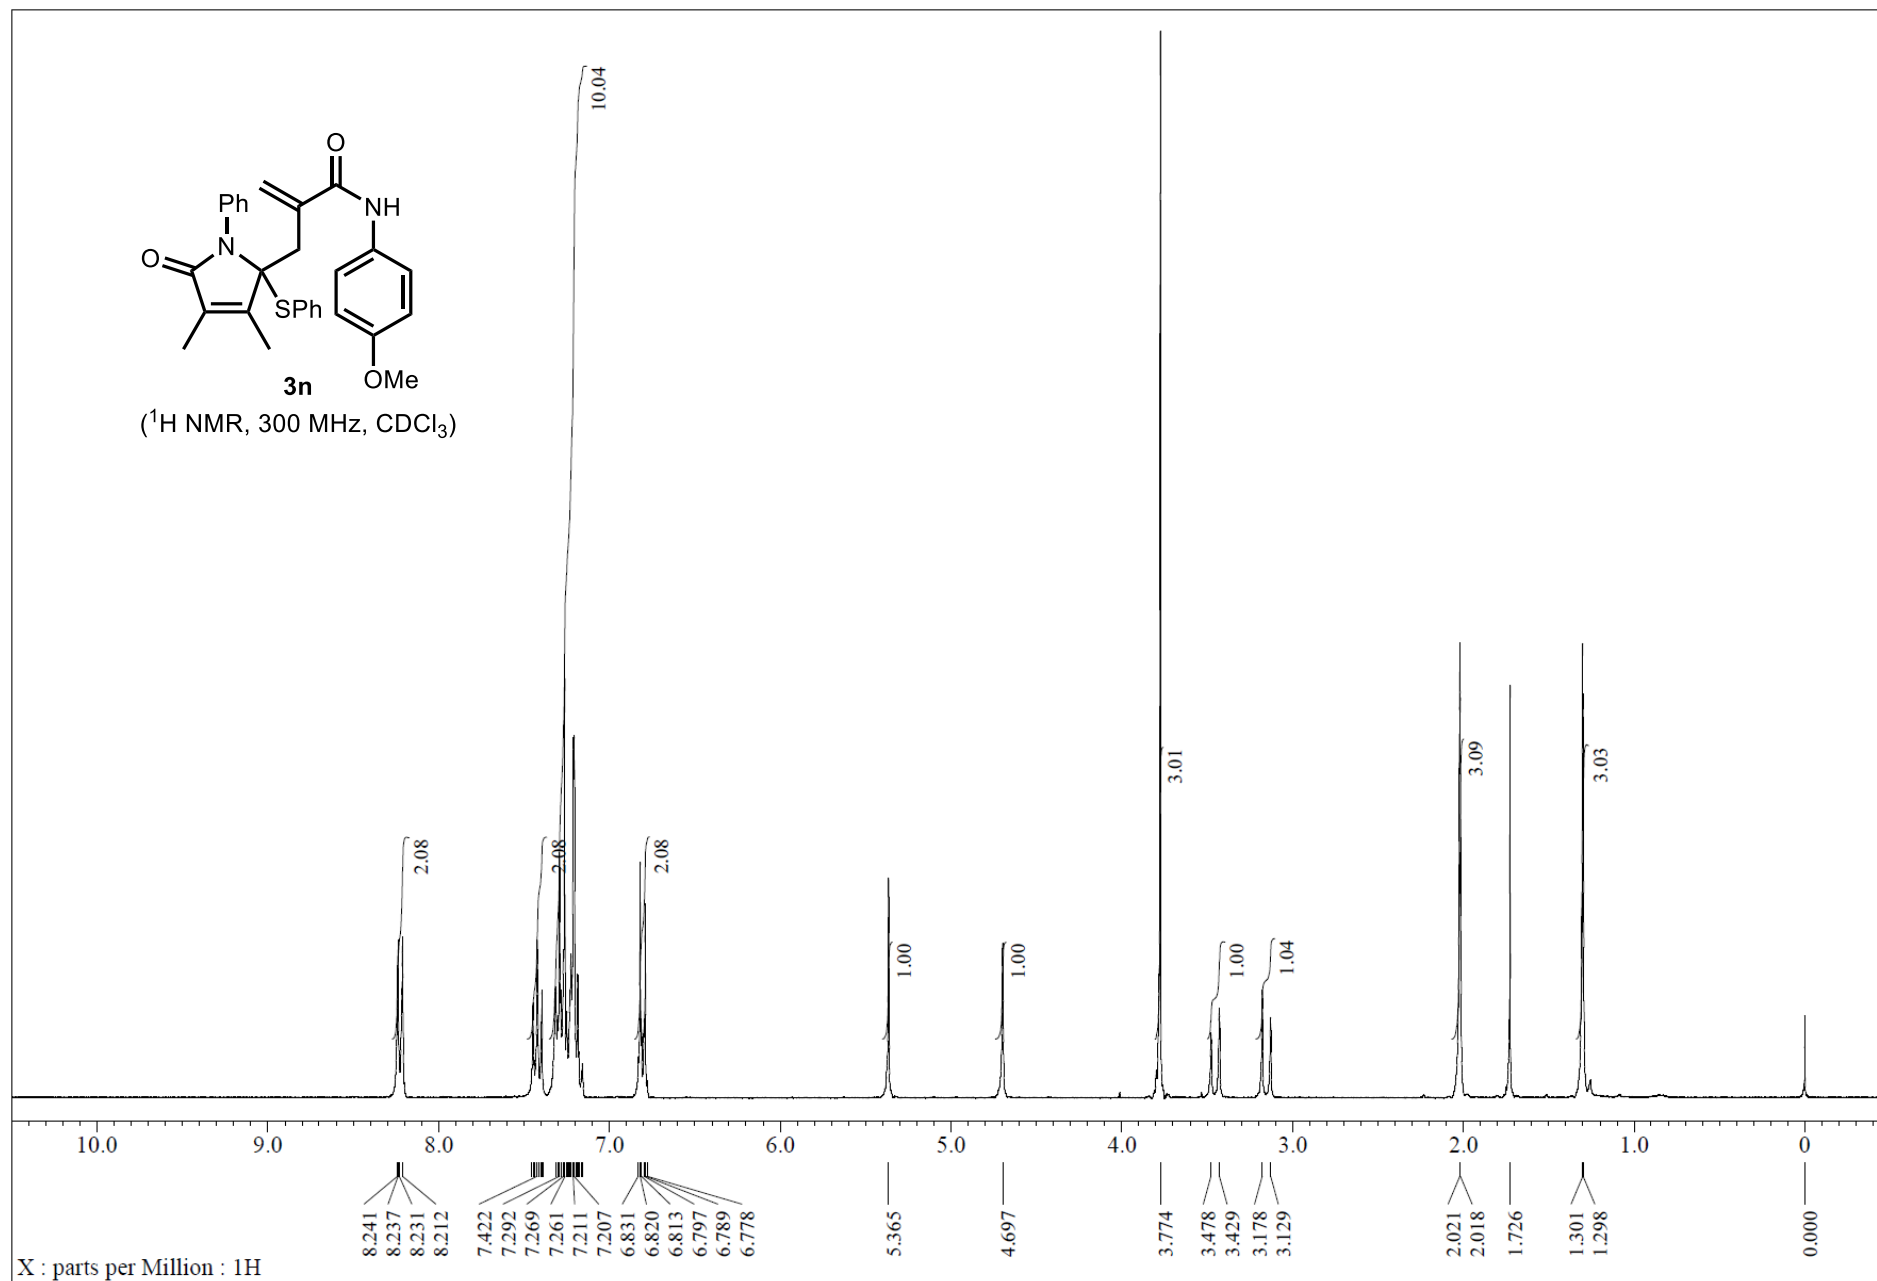

X : parts per Million : 1H

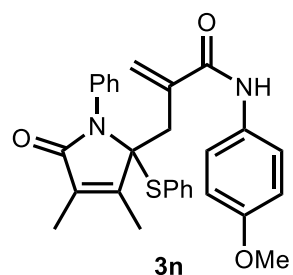

( $^{13}\text{C}$  NMR, 75 MHz,  $\text{CDCl}_3$ )

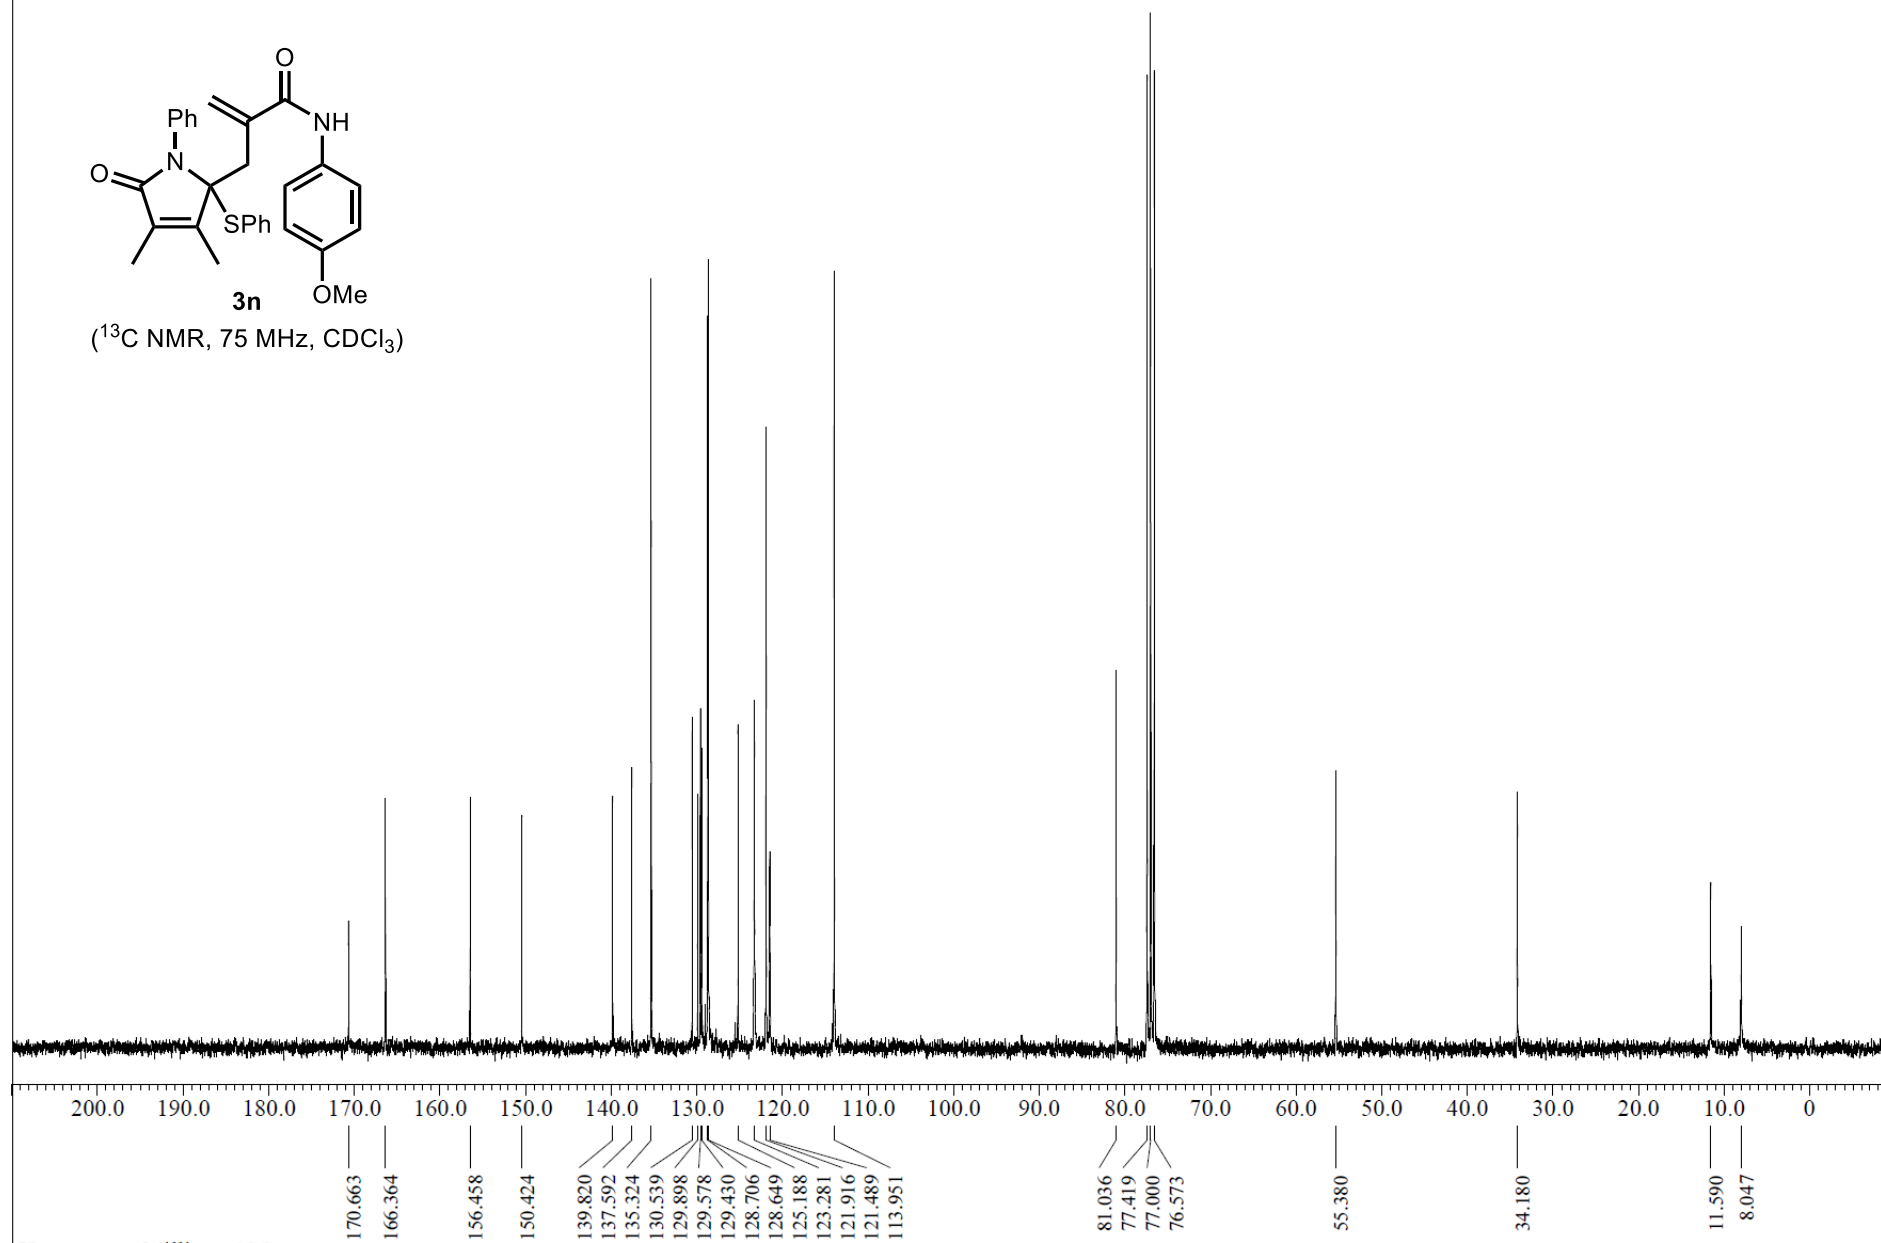

X : parts per Million :  $^{13}\text{C}$

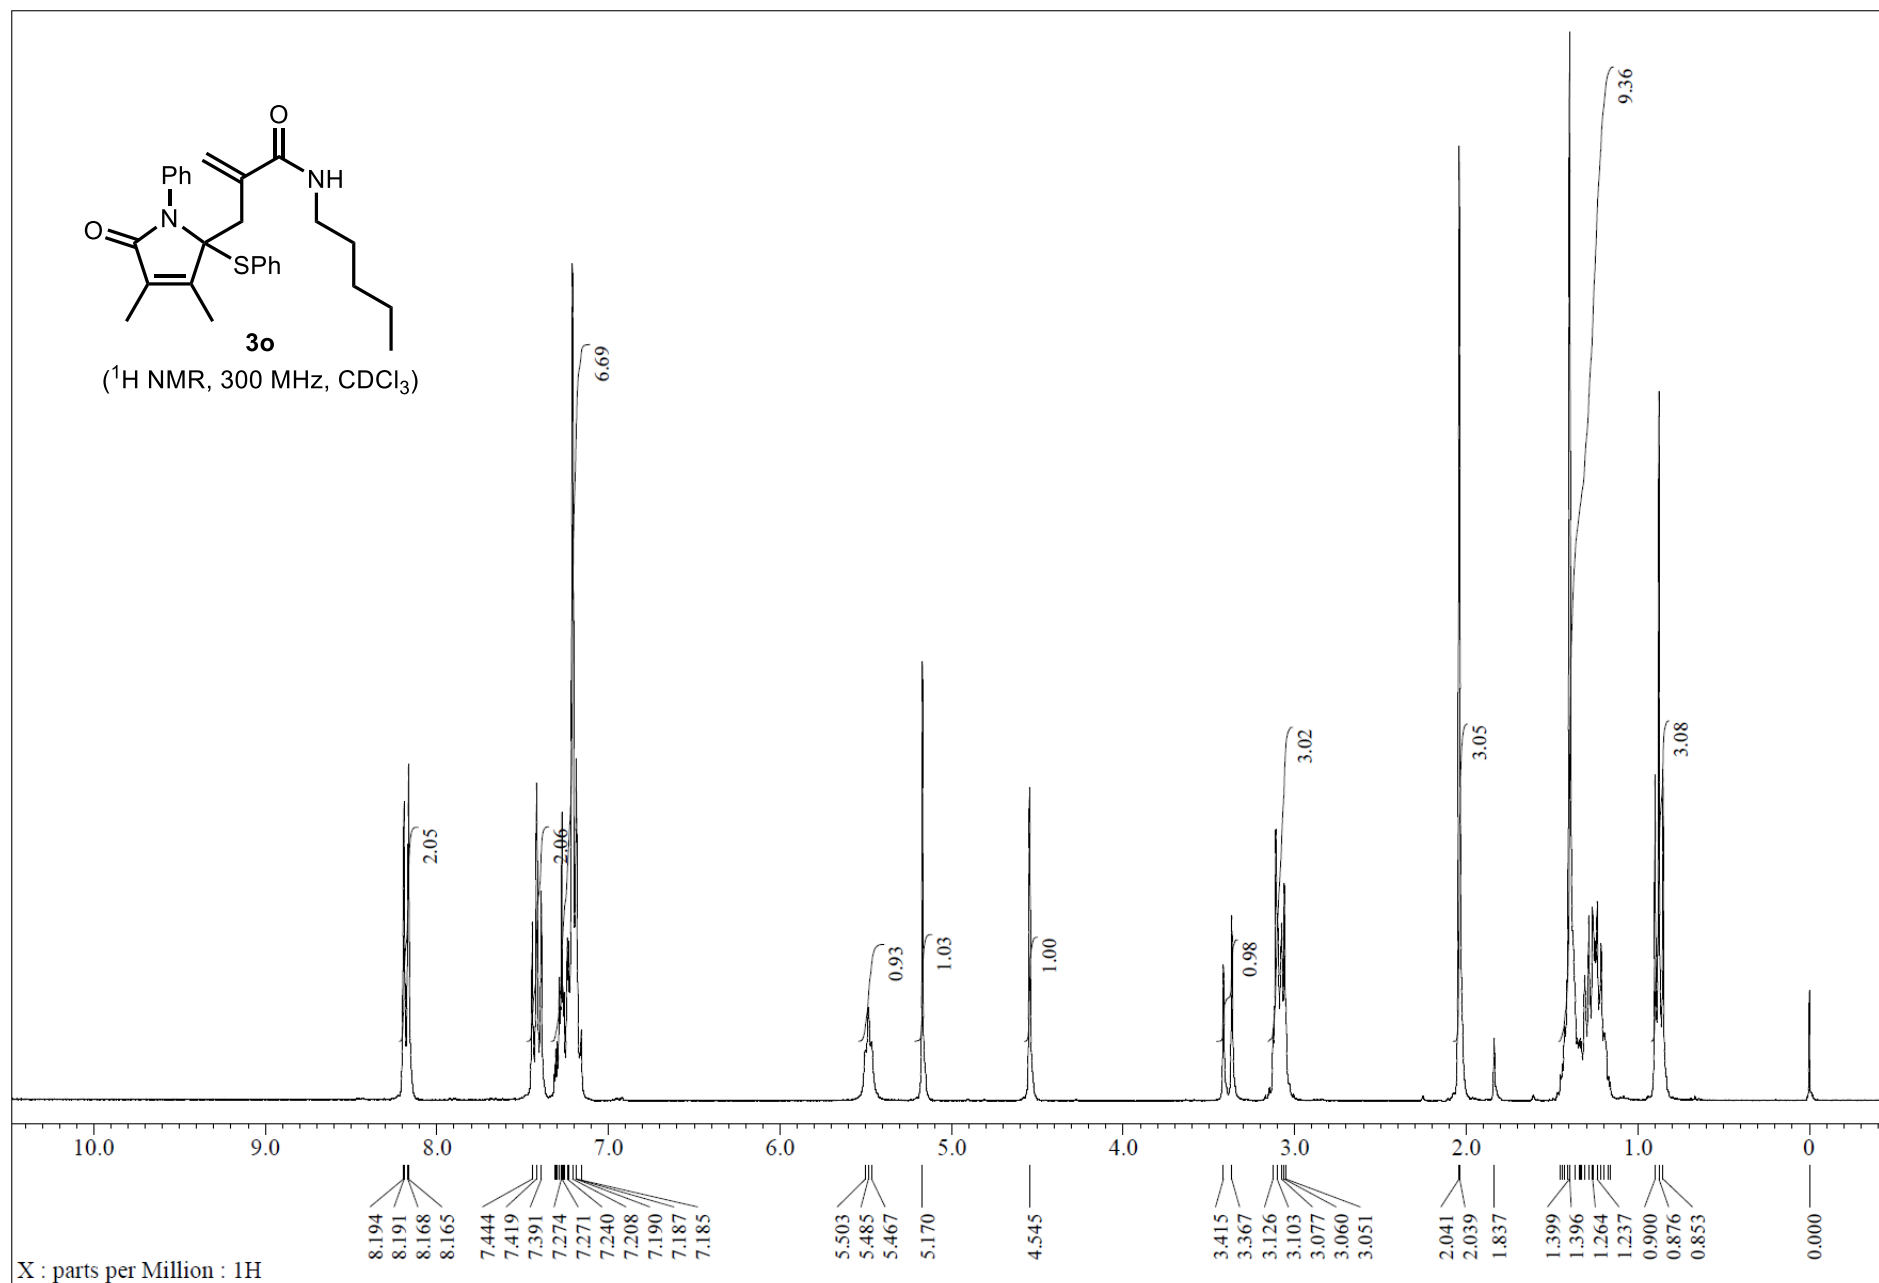

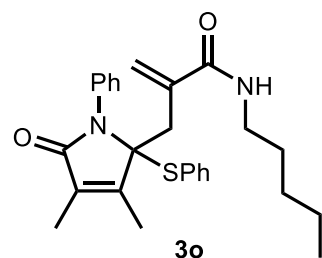

( $^{13}\text{C}$  NMR, 75 MHz,  $\text{CDCl}_3$ )

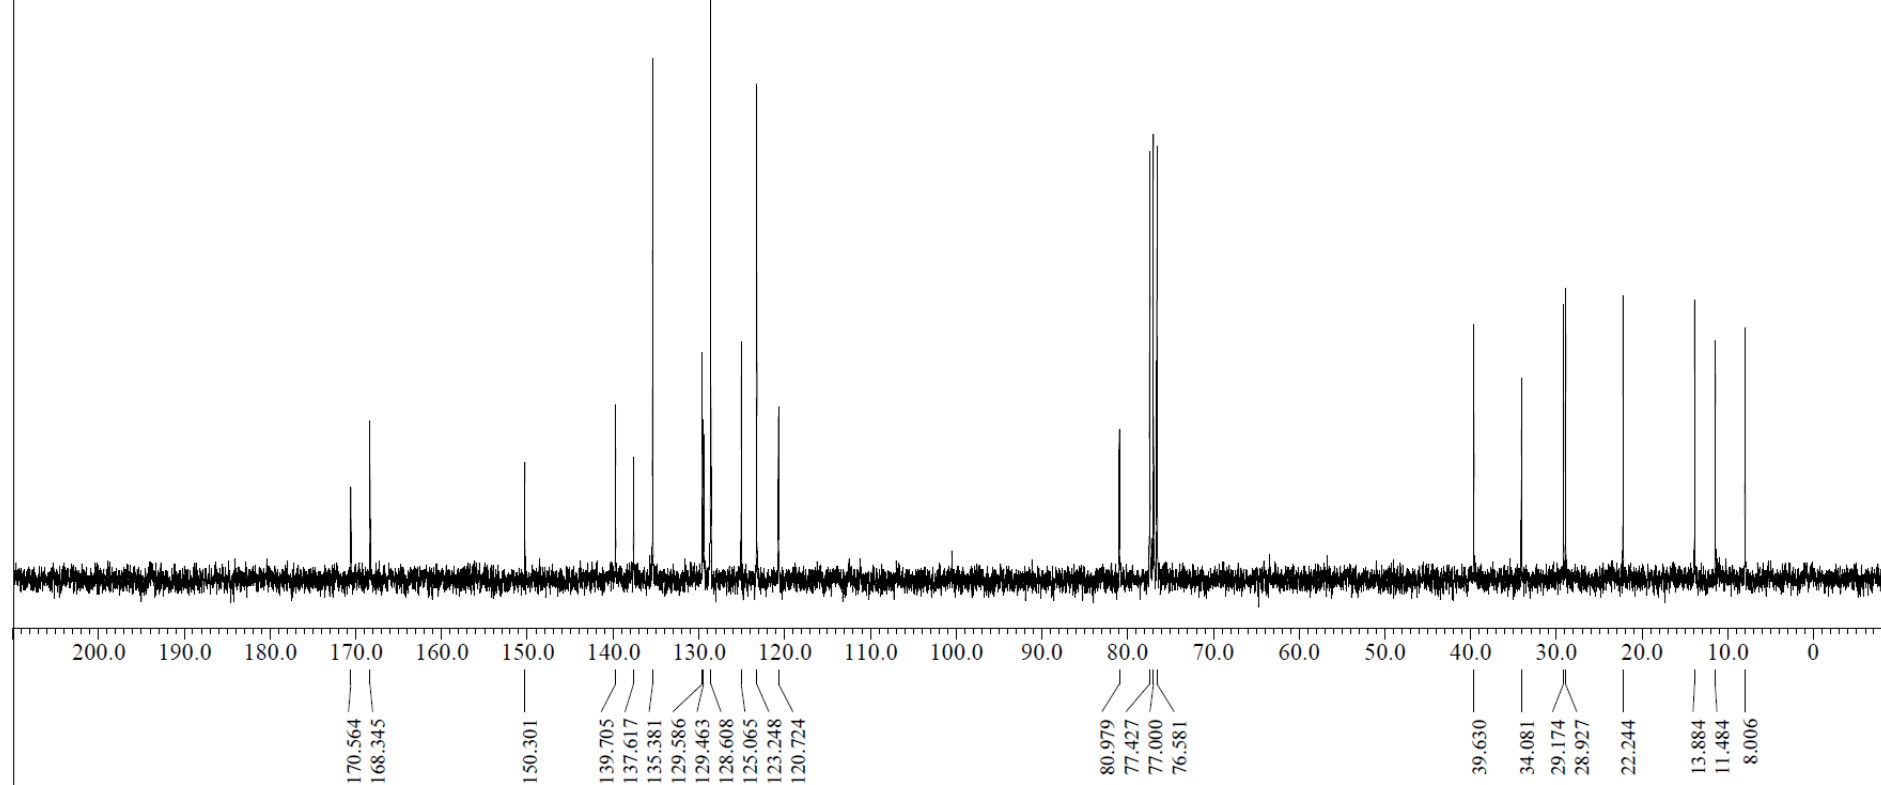

X : parts per Million :  $^{13}\text{C}$

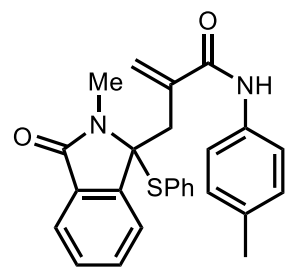

**3p**

(<sup>1</sup>H NMR, 300 MHz, CDCl<sub>3</sub>)

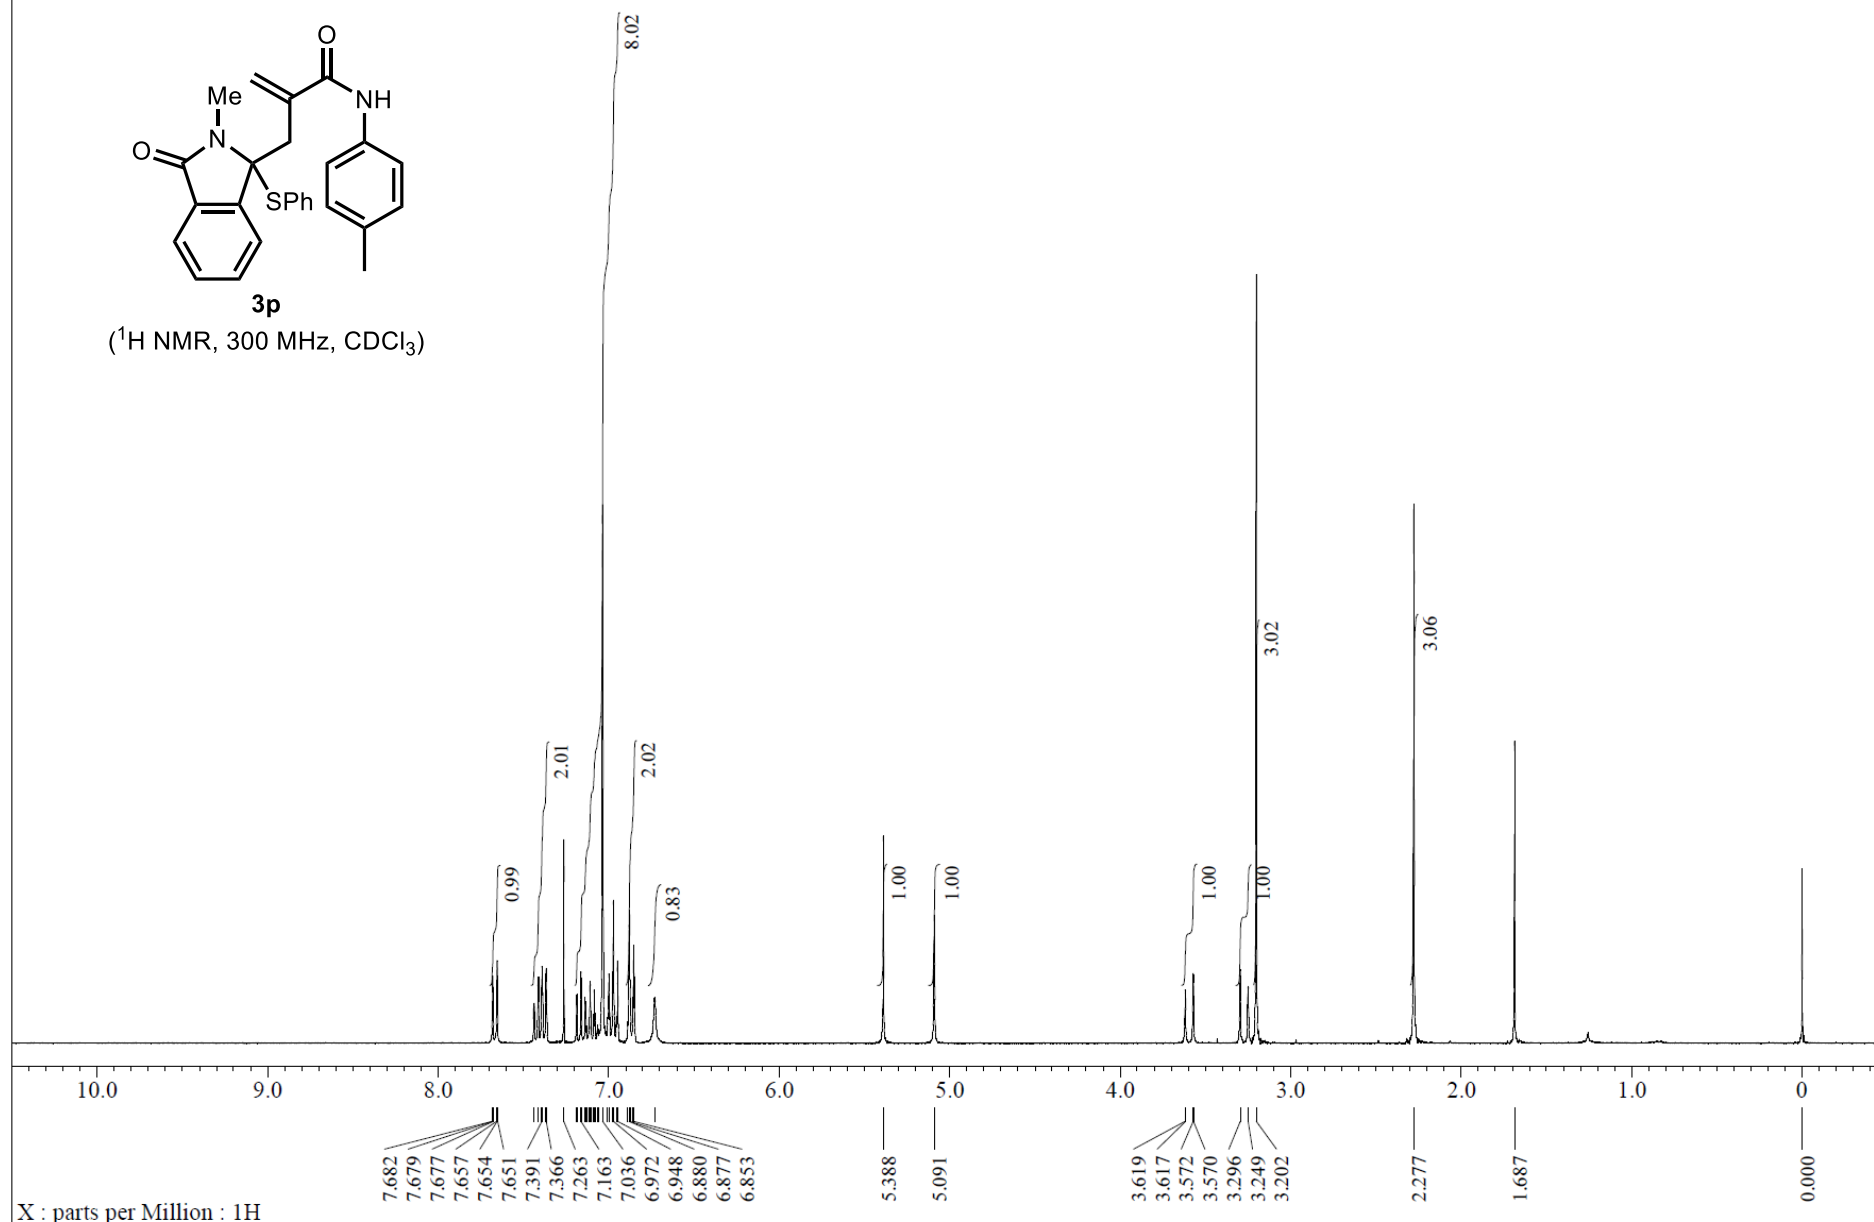

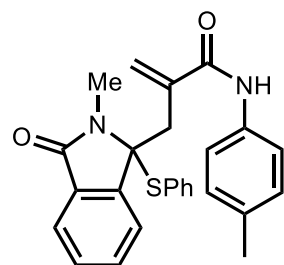

**3p**

( $^{13}\text{C}$  NMR, 75 MHz,  $\text{CDCl}_3$ )

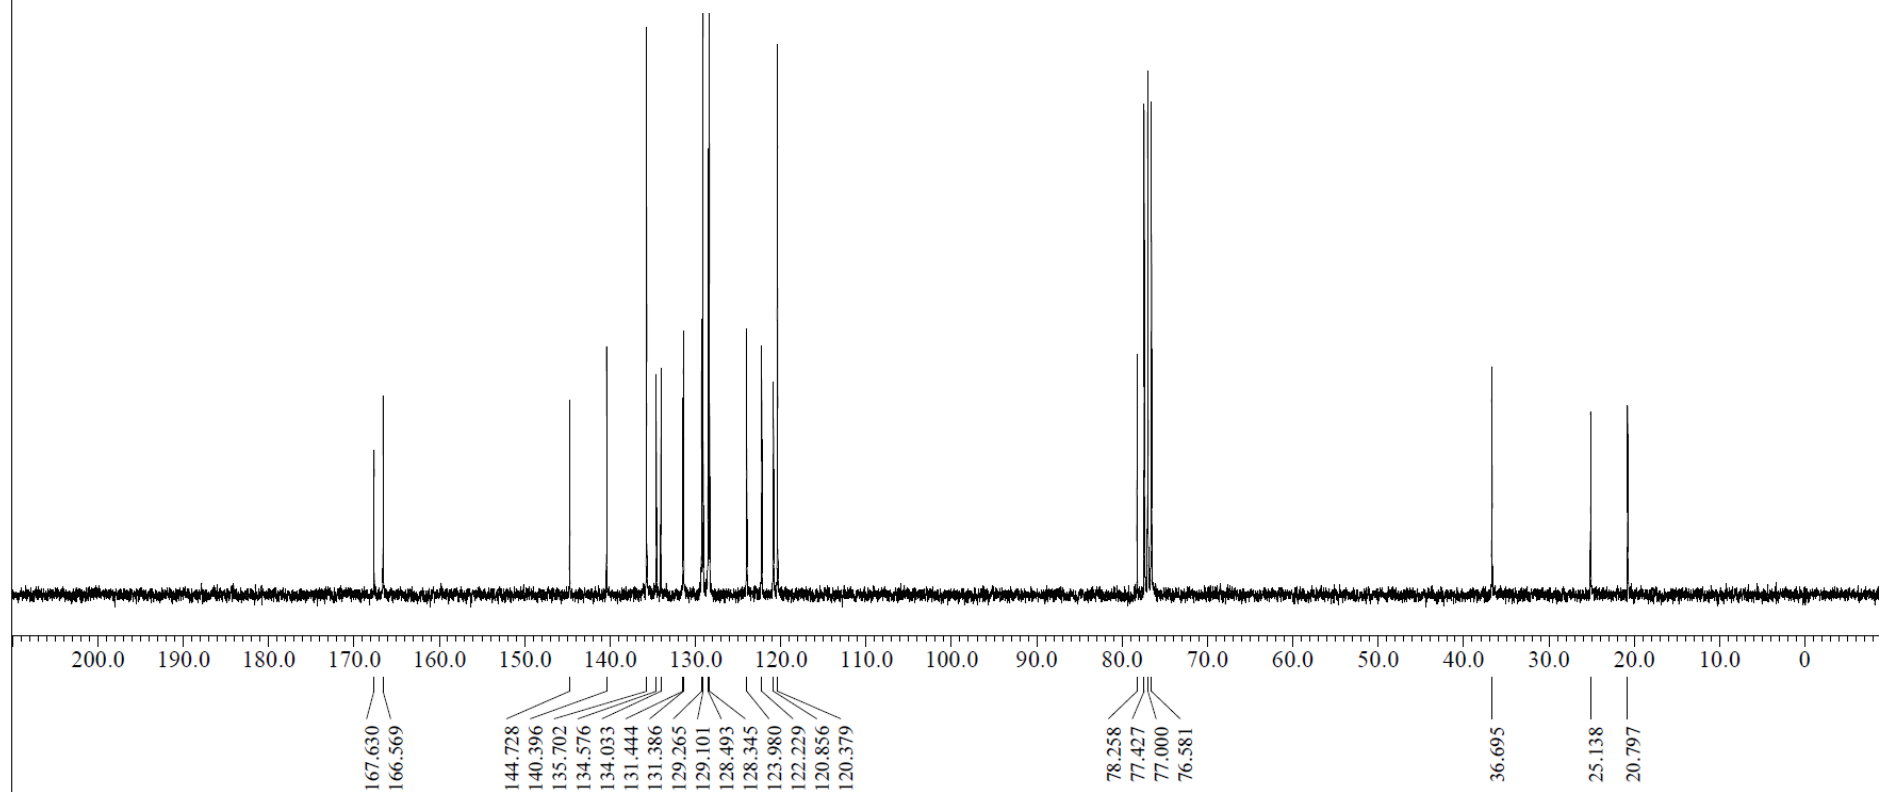

X : parts per Million :  $^{13}\text{C}$

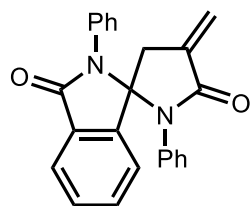

**4a**

(<sup>1</sup>H NMR, 300 MHz, CDCl<sub>3</sub>)

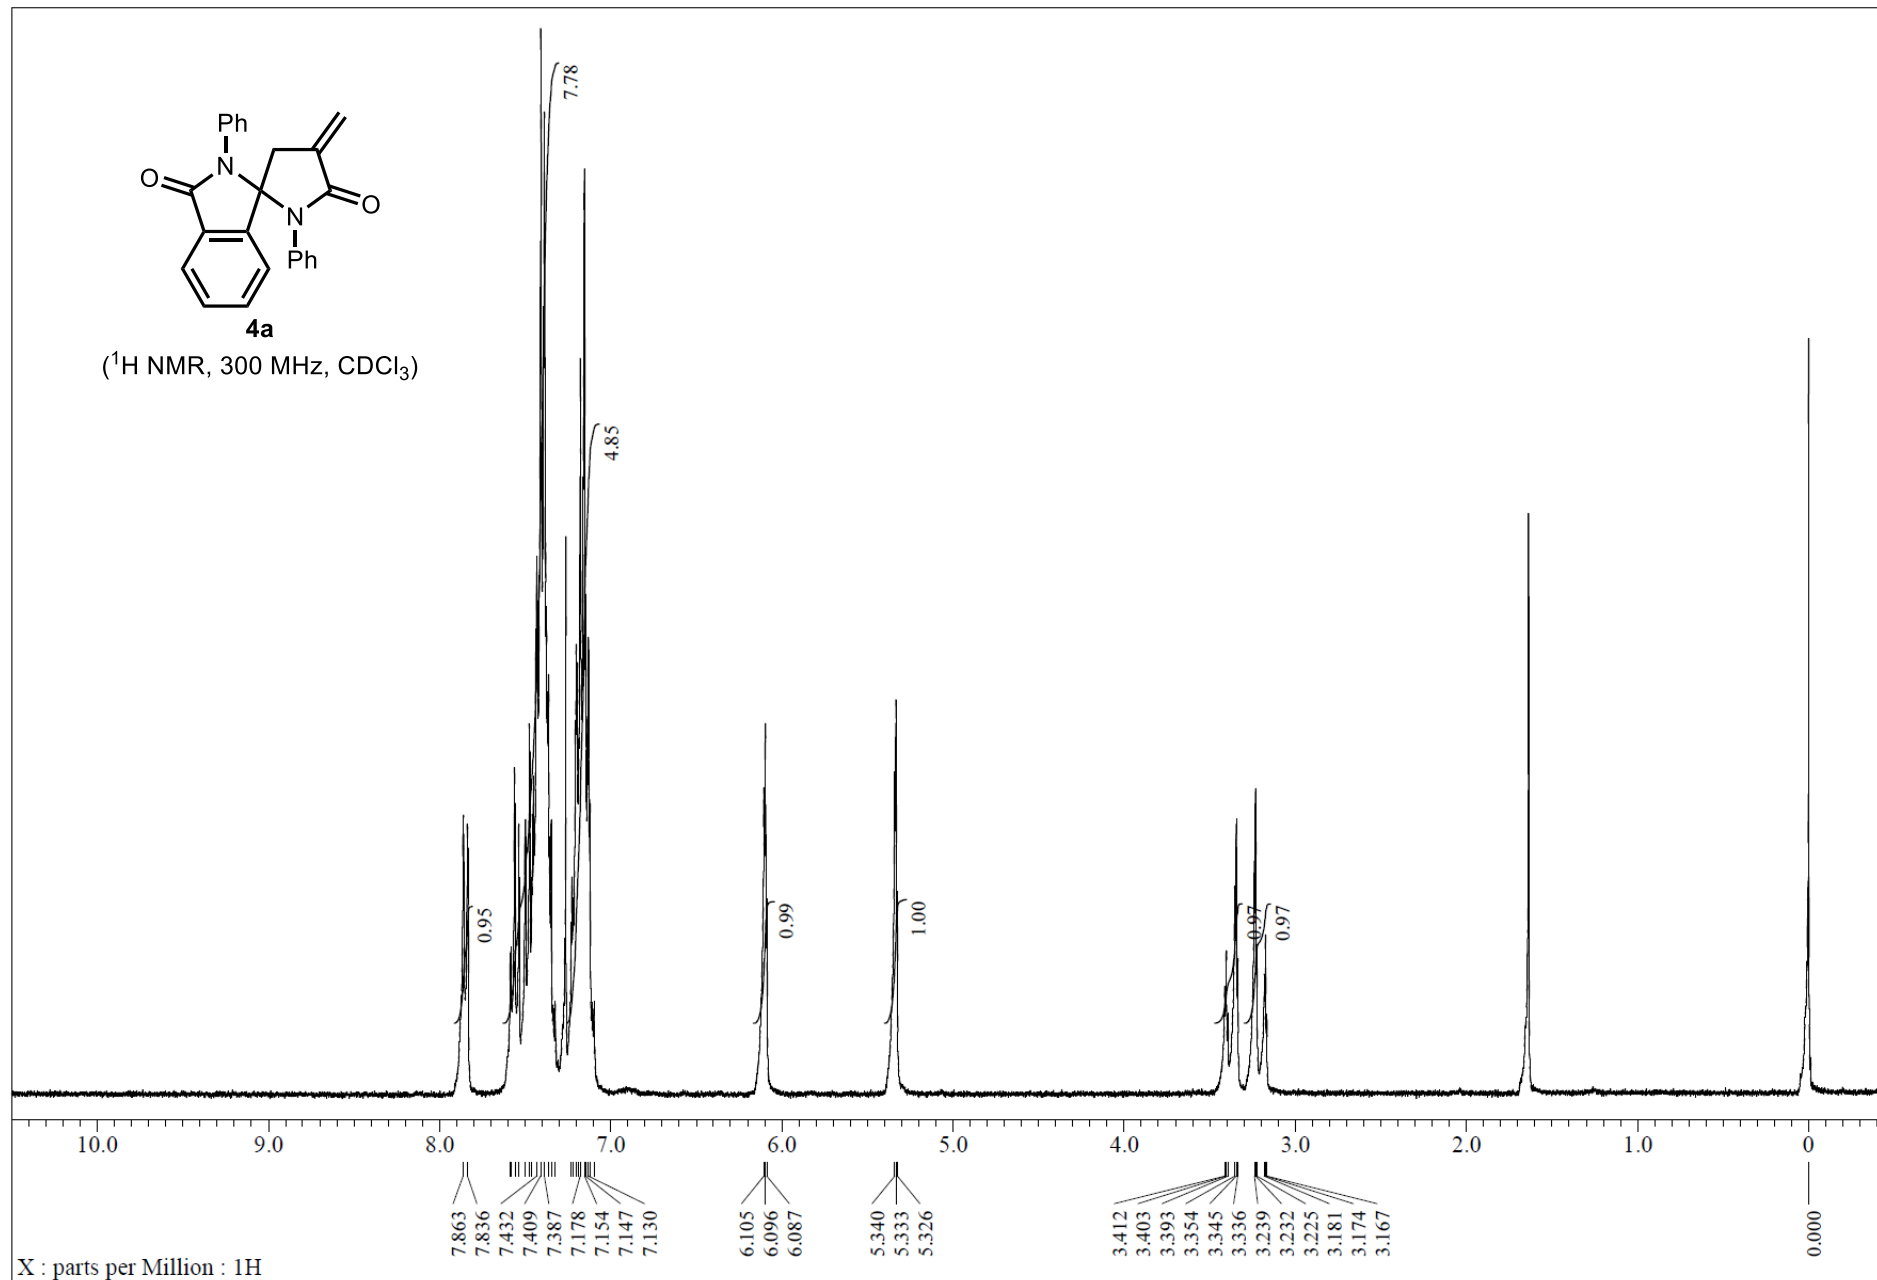

X : parts per Million : 1H

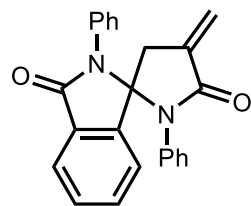

**4a**

( $^{13}\text{C}$  NMR, 75 MHz,  $\text{CDCl}_3$ )

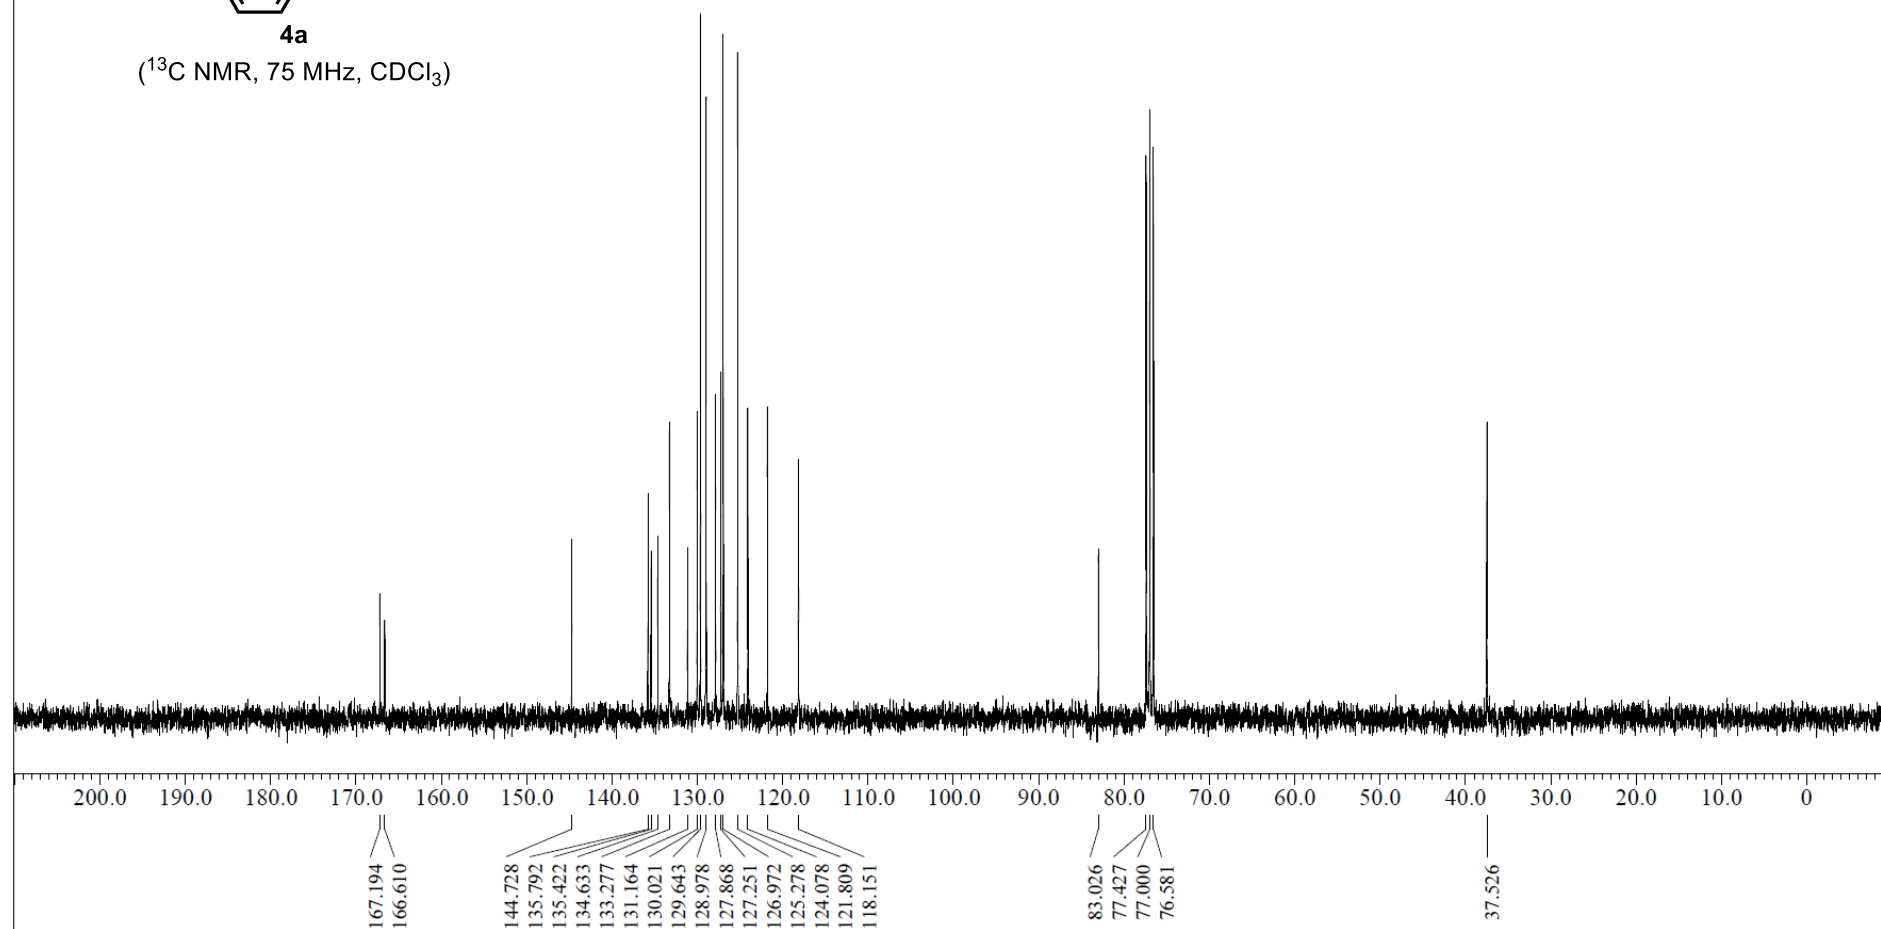

X : parts per Million :  $^{13}\text{C}$



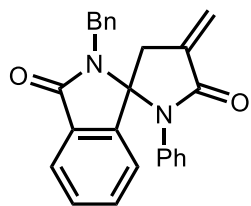

**4b**

(<sup>1</sup>H NMR, 300 MHz, CDCl<sub>3</sub>)

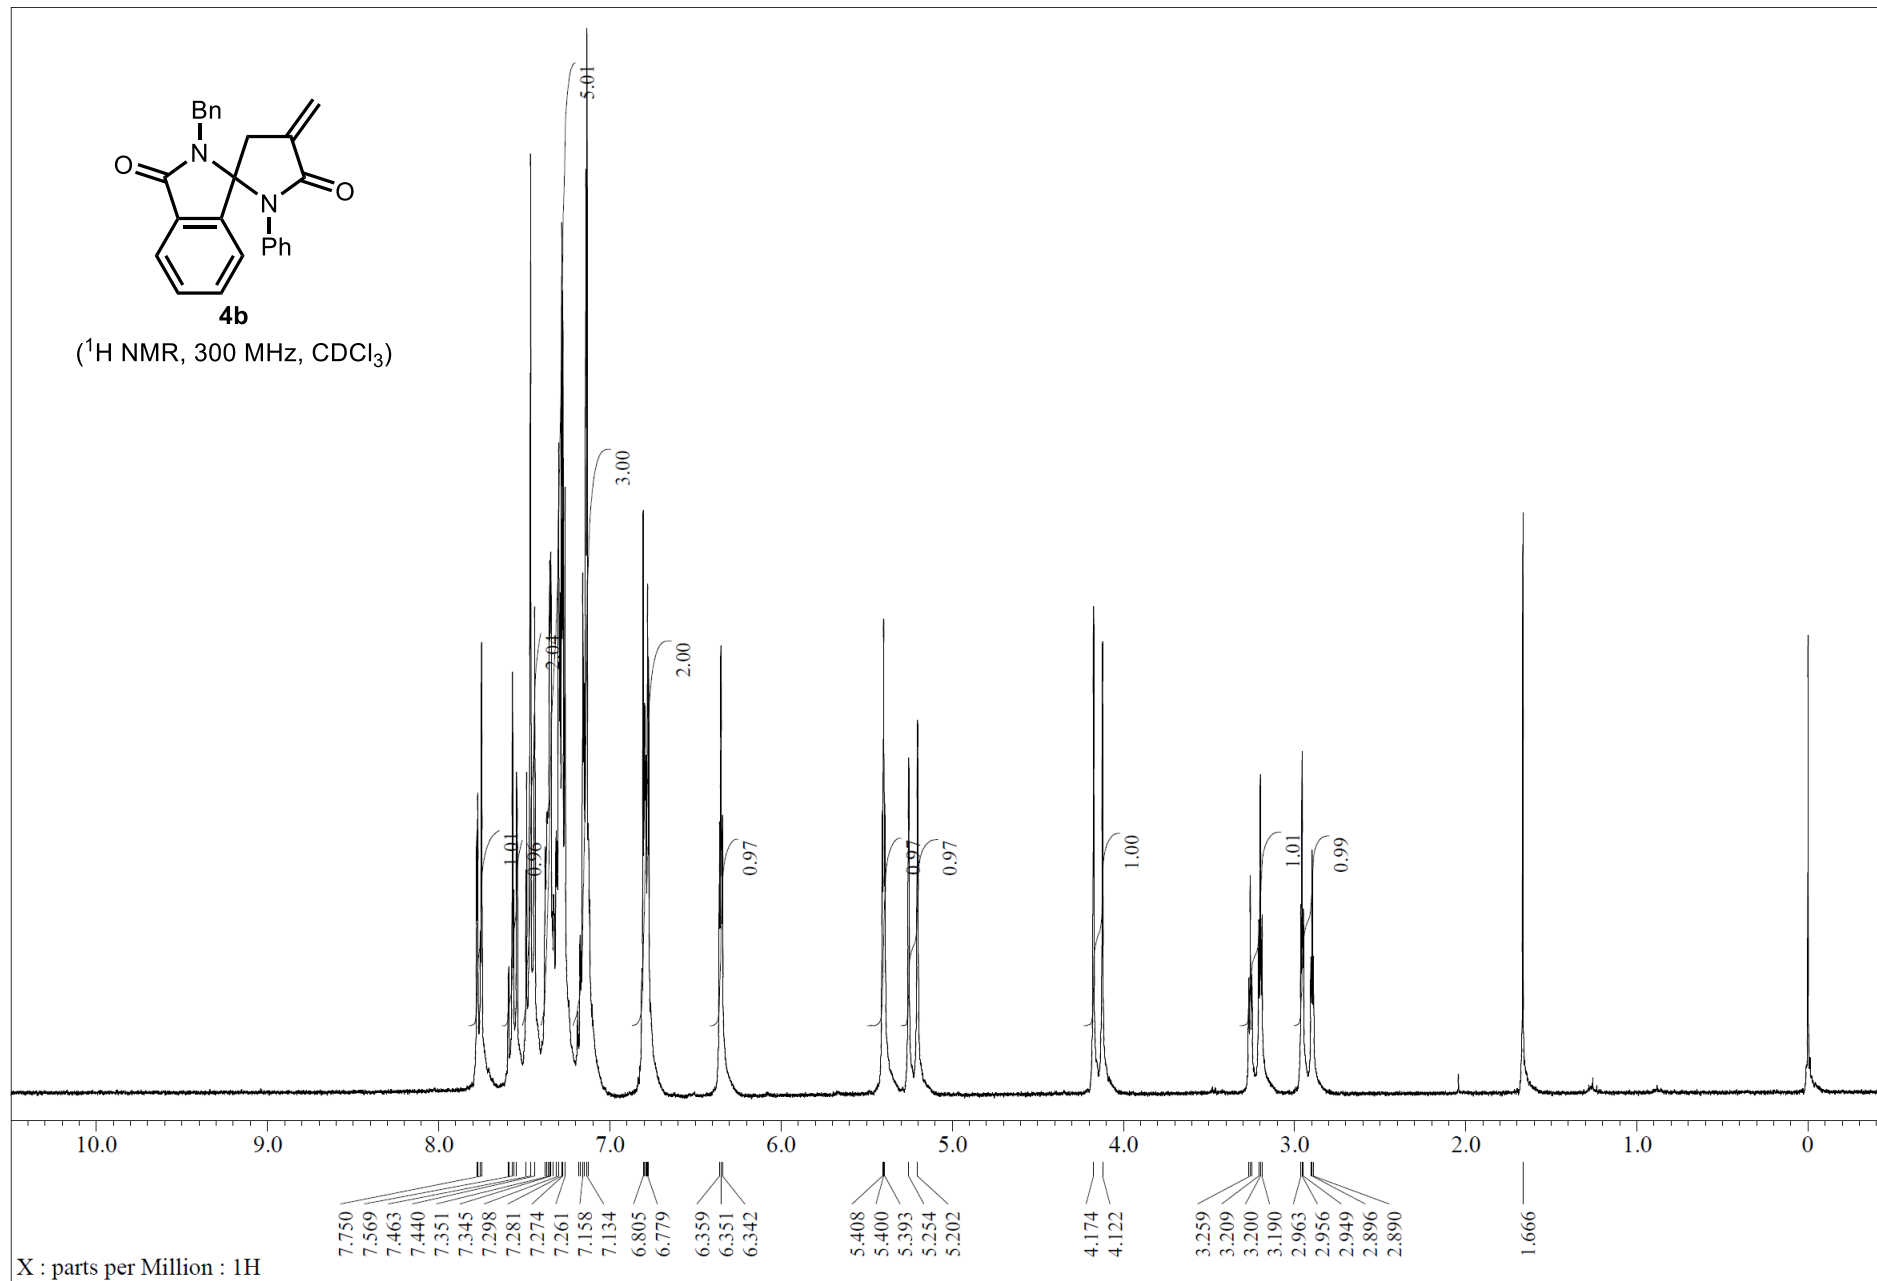

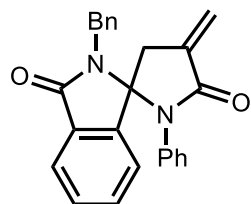

**4b**

( $^{13}\text{C}$  NMR, 75 MHz,  $\text{CDCl}_3$ )

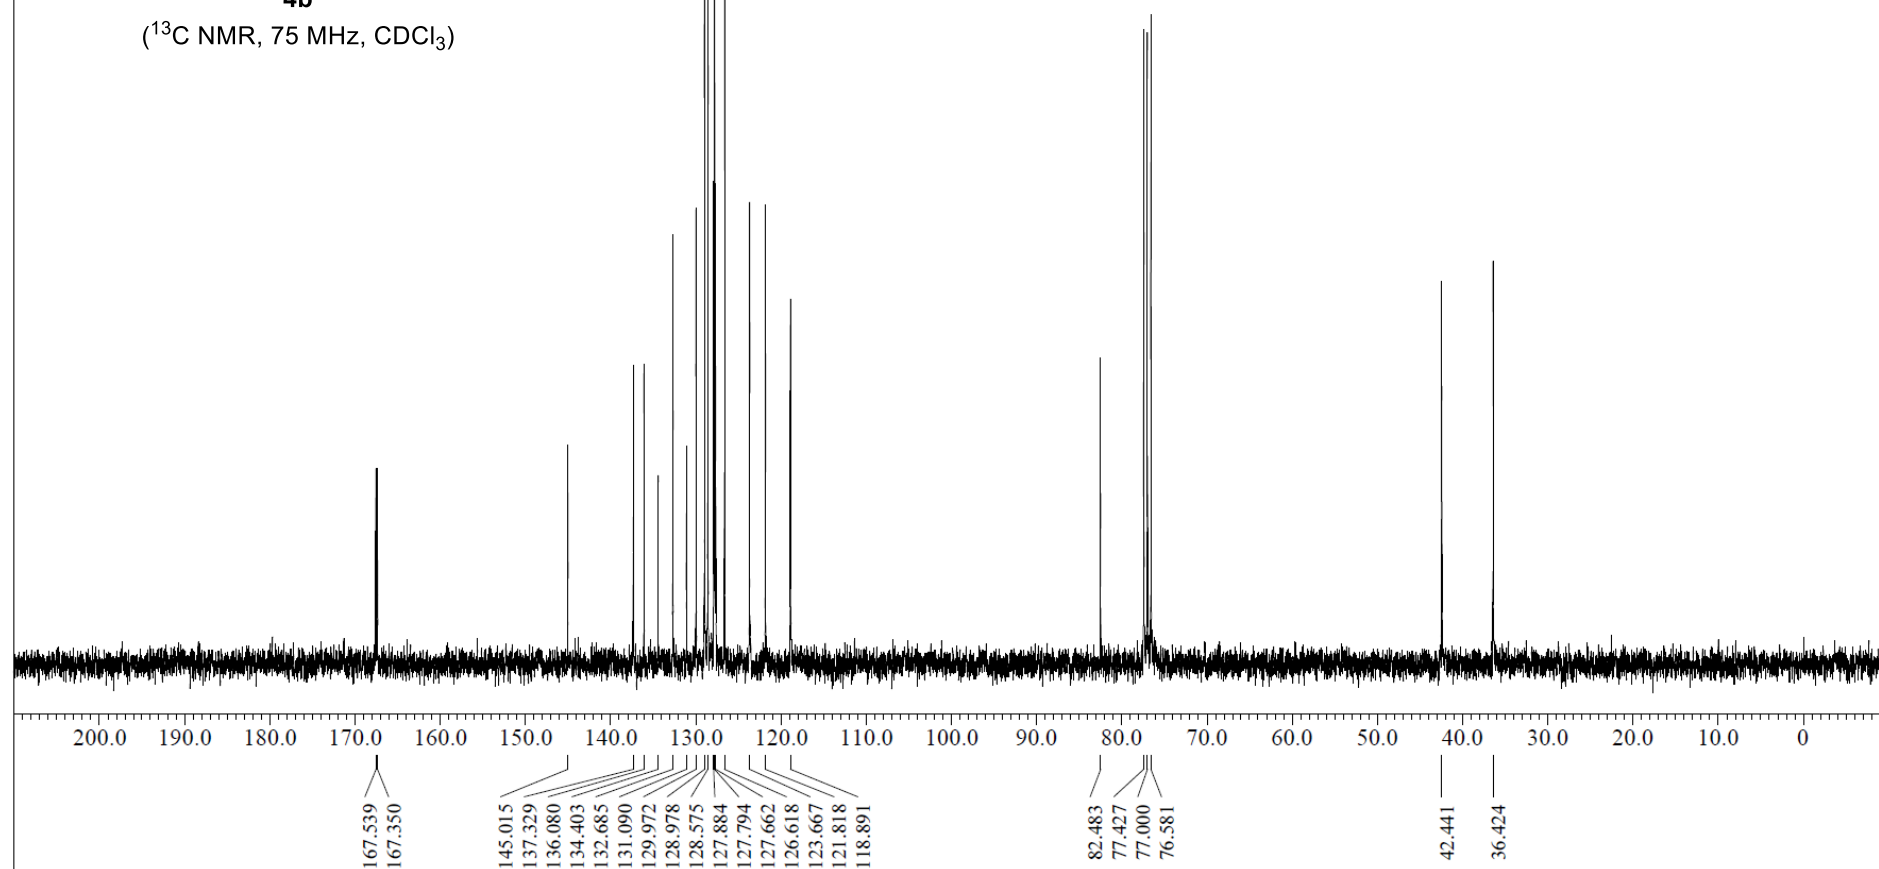

X : parts per Million :  $^{13}\text{C}$

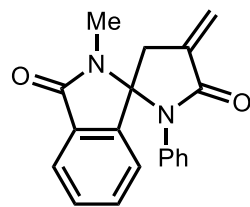

**4c**

( $^1\text{H}$  NMR, 300 MHz,  $\text{CDCl}_3$ )

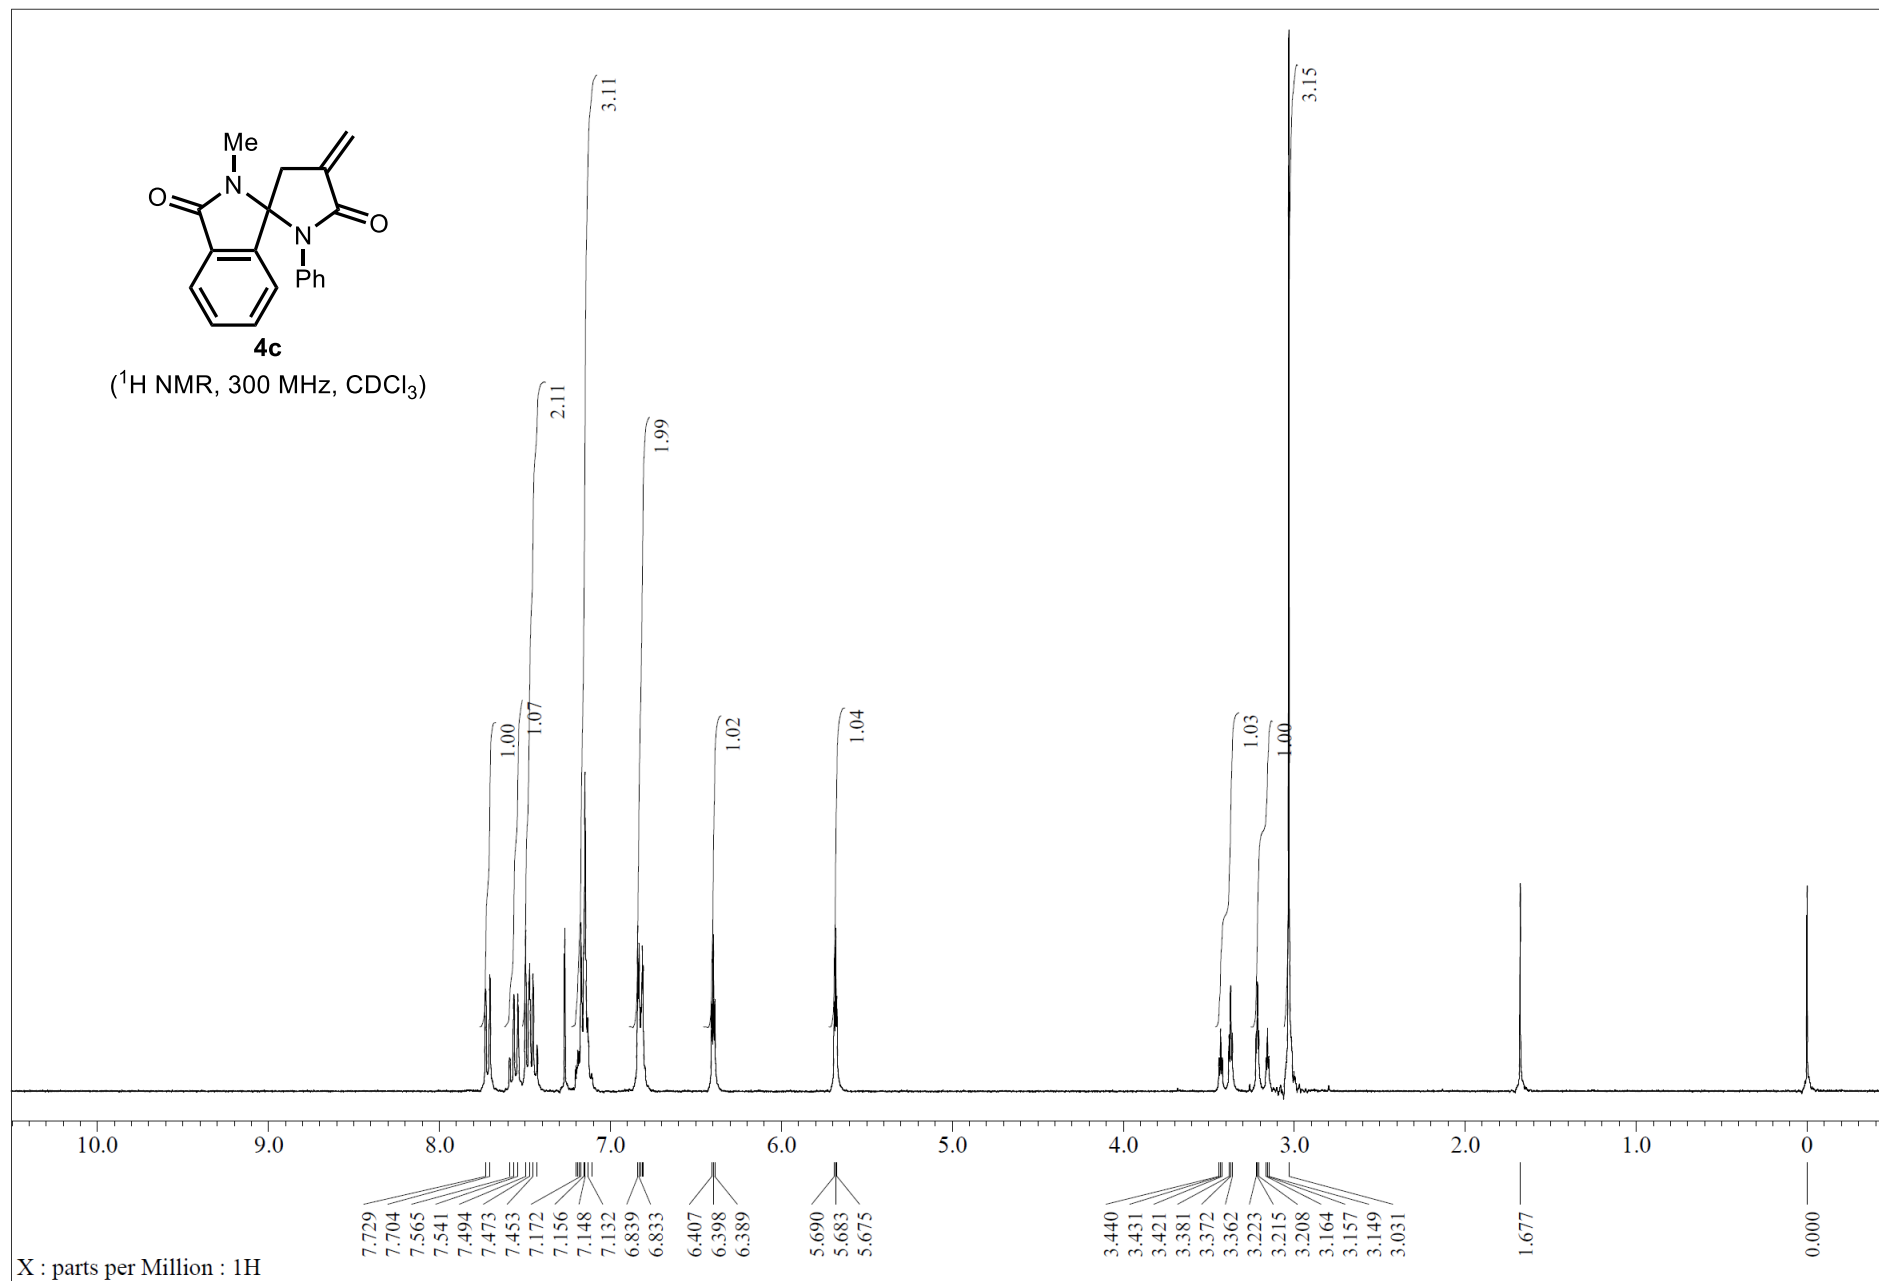

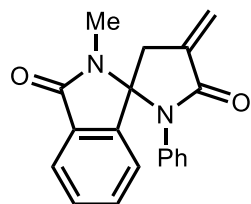

**4c**

( $^{13}\text{C}$  NMR, 75 MHz,  $\text{CDCl}_3$ )

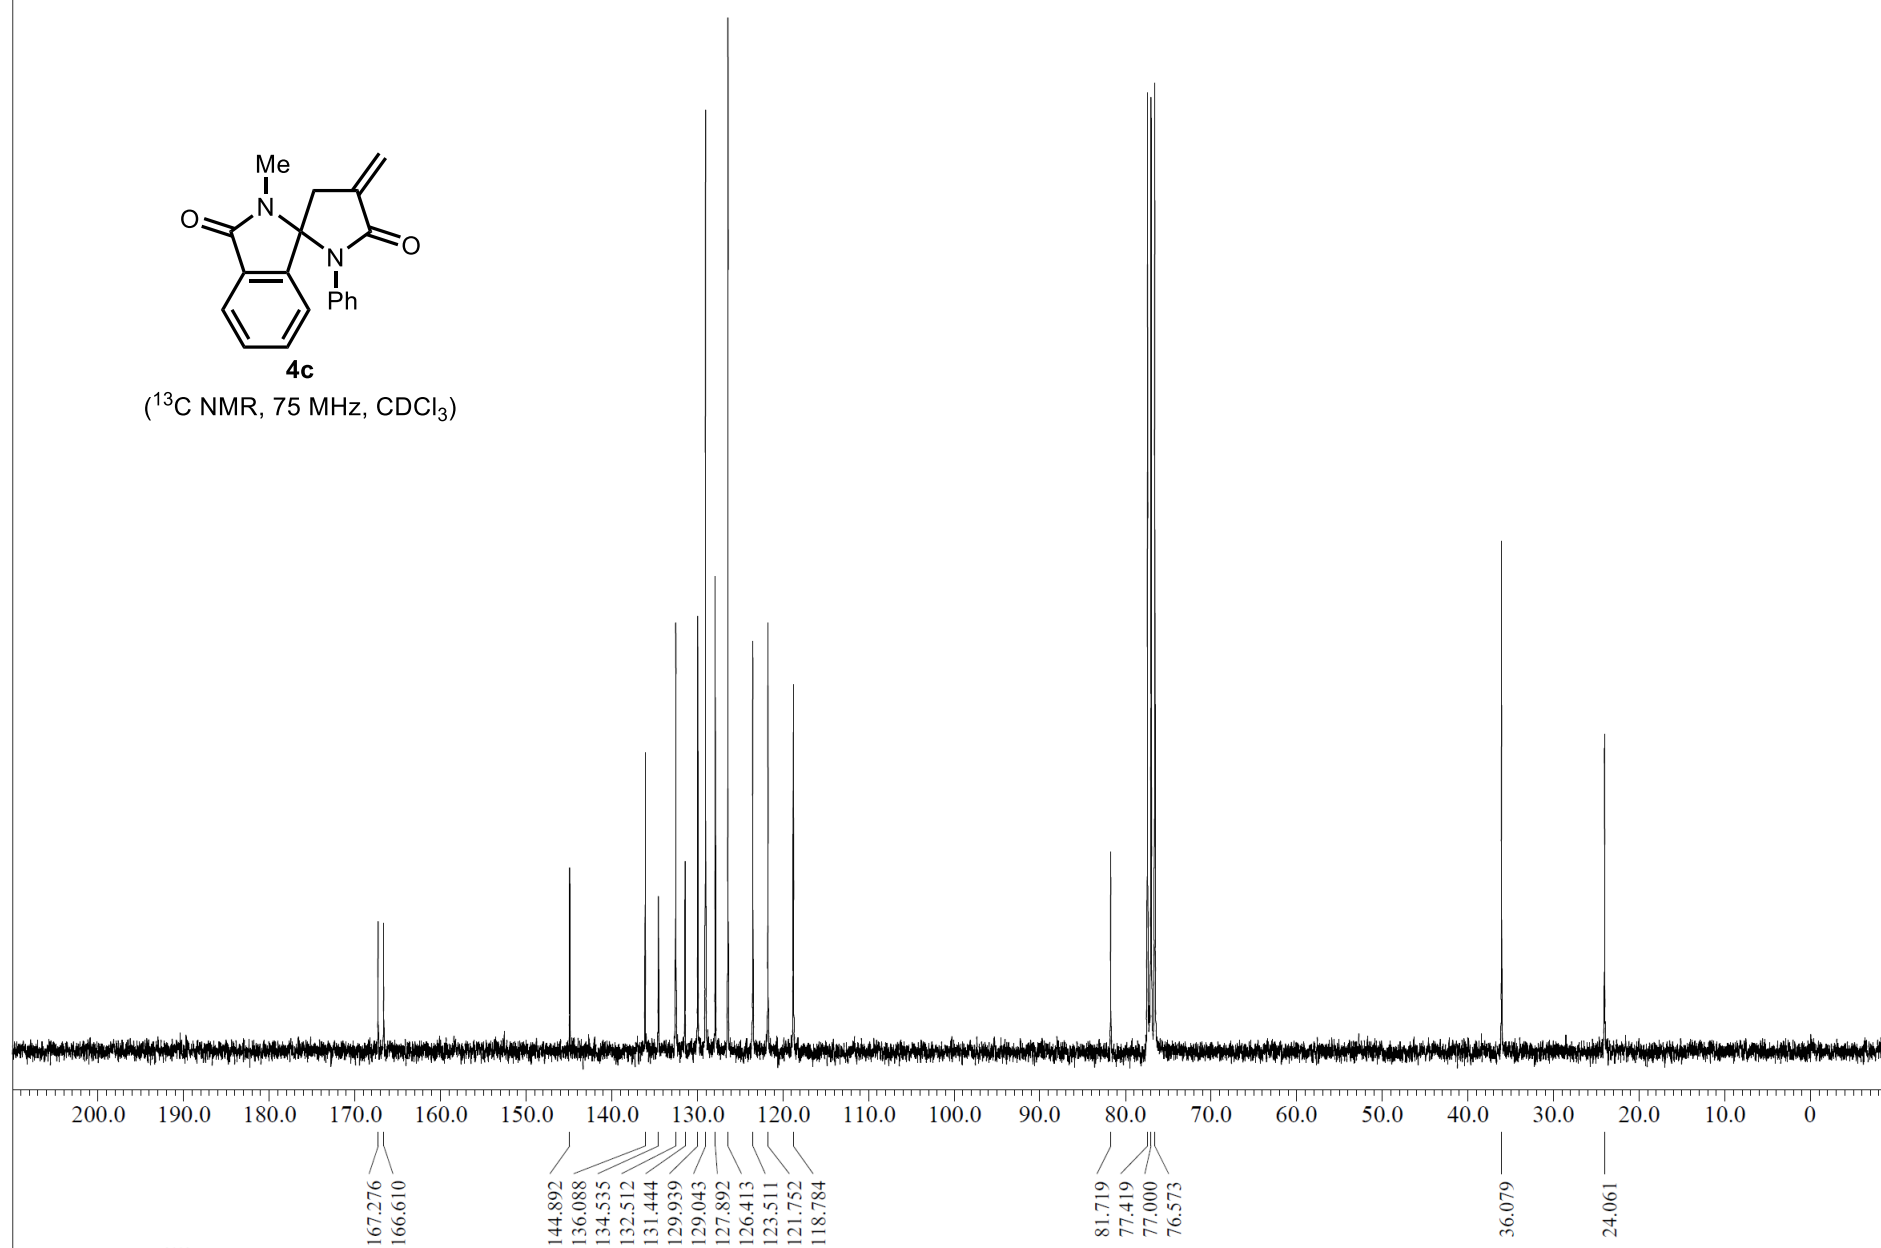

X : parts per Million :  $^{13}\text{C}$

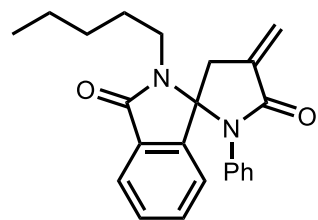

**4d**  
(<sup>1</sup>H NMR, 300 MHz, CDCl<sub>3</sub>)

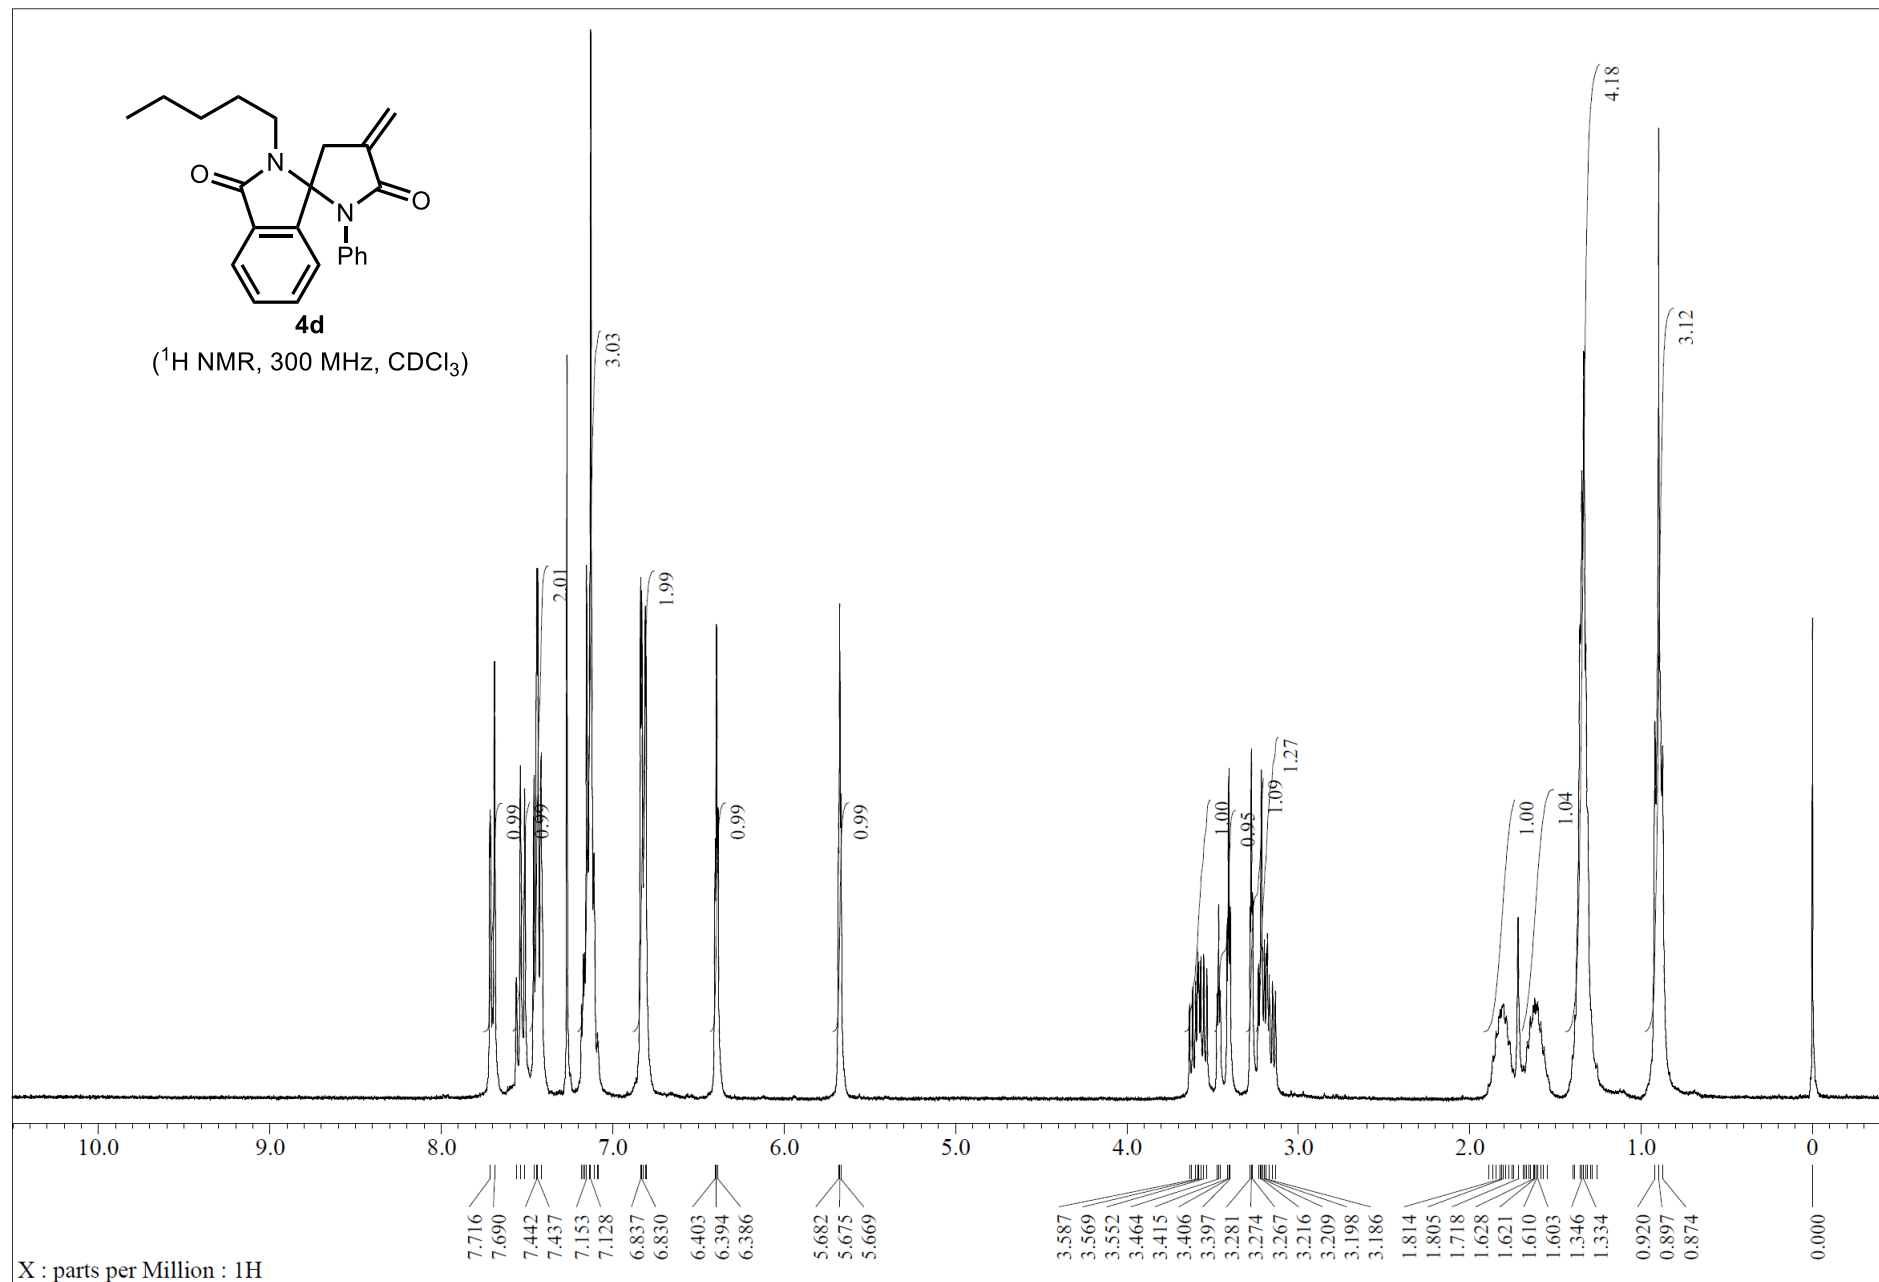

X : parts per Million : 1H

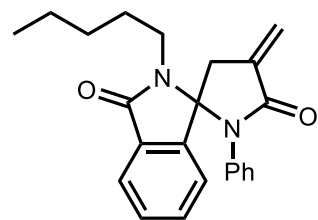

**4d**

( $^{13}\text{C}$  NMR, 75 MHz,  $\text{CDCl}_3$ )

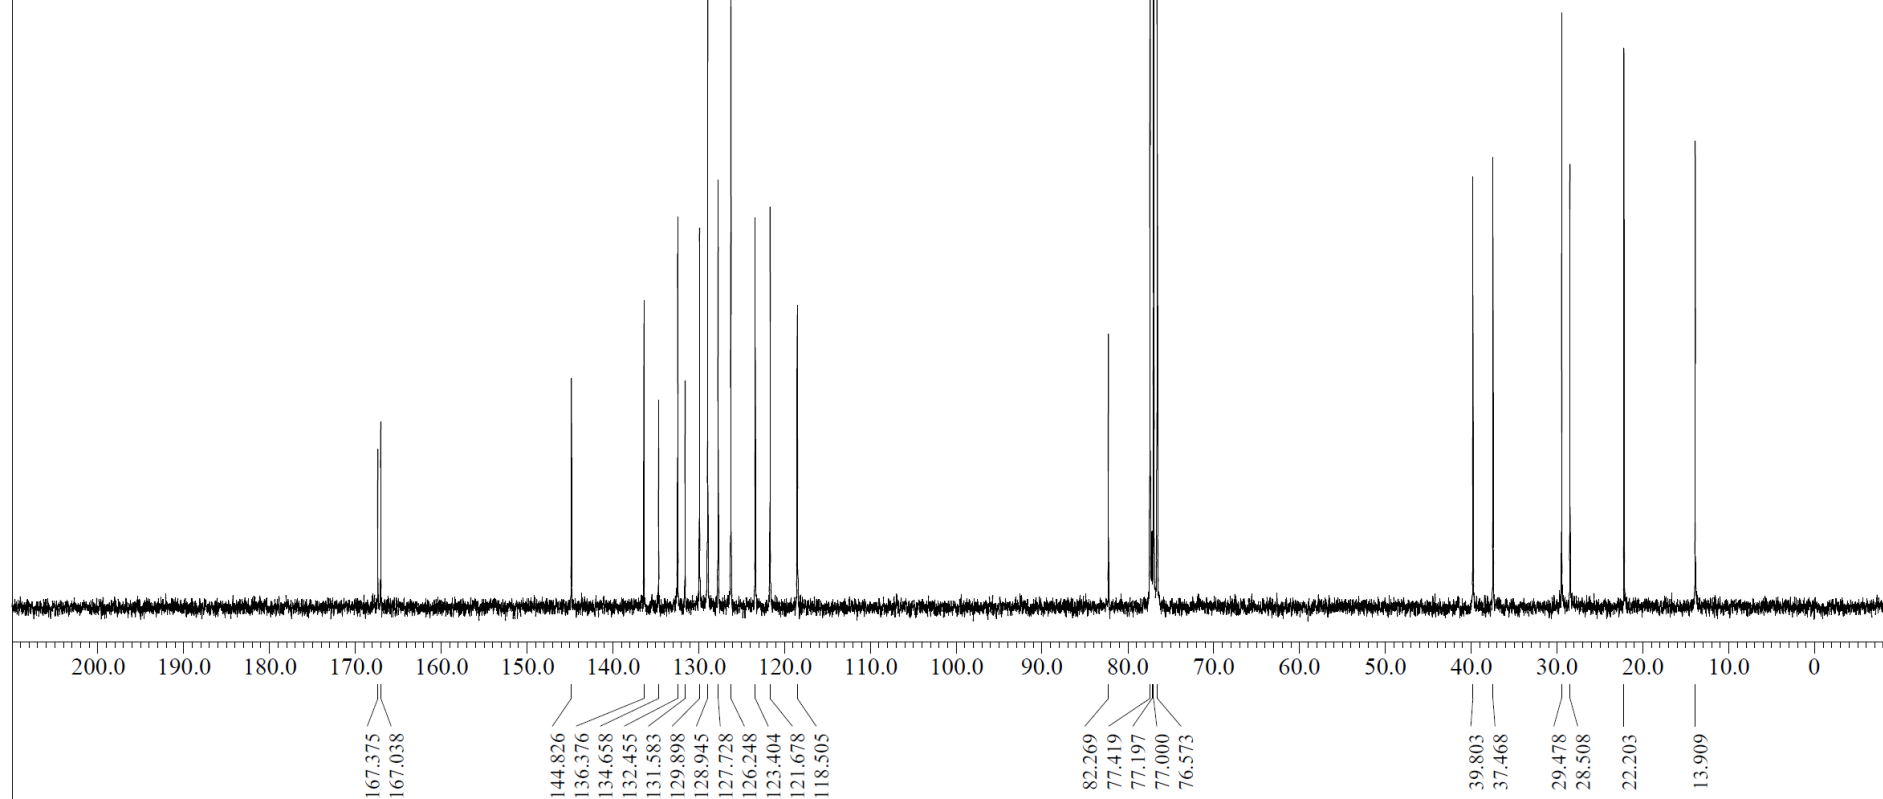

X : parts per Million :  $^{13}\text{C}$

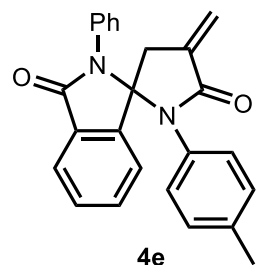

( $^1\text{H}$  NMR, 300 MHz,  $\text{CDCl}_3$ )

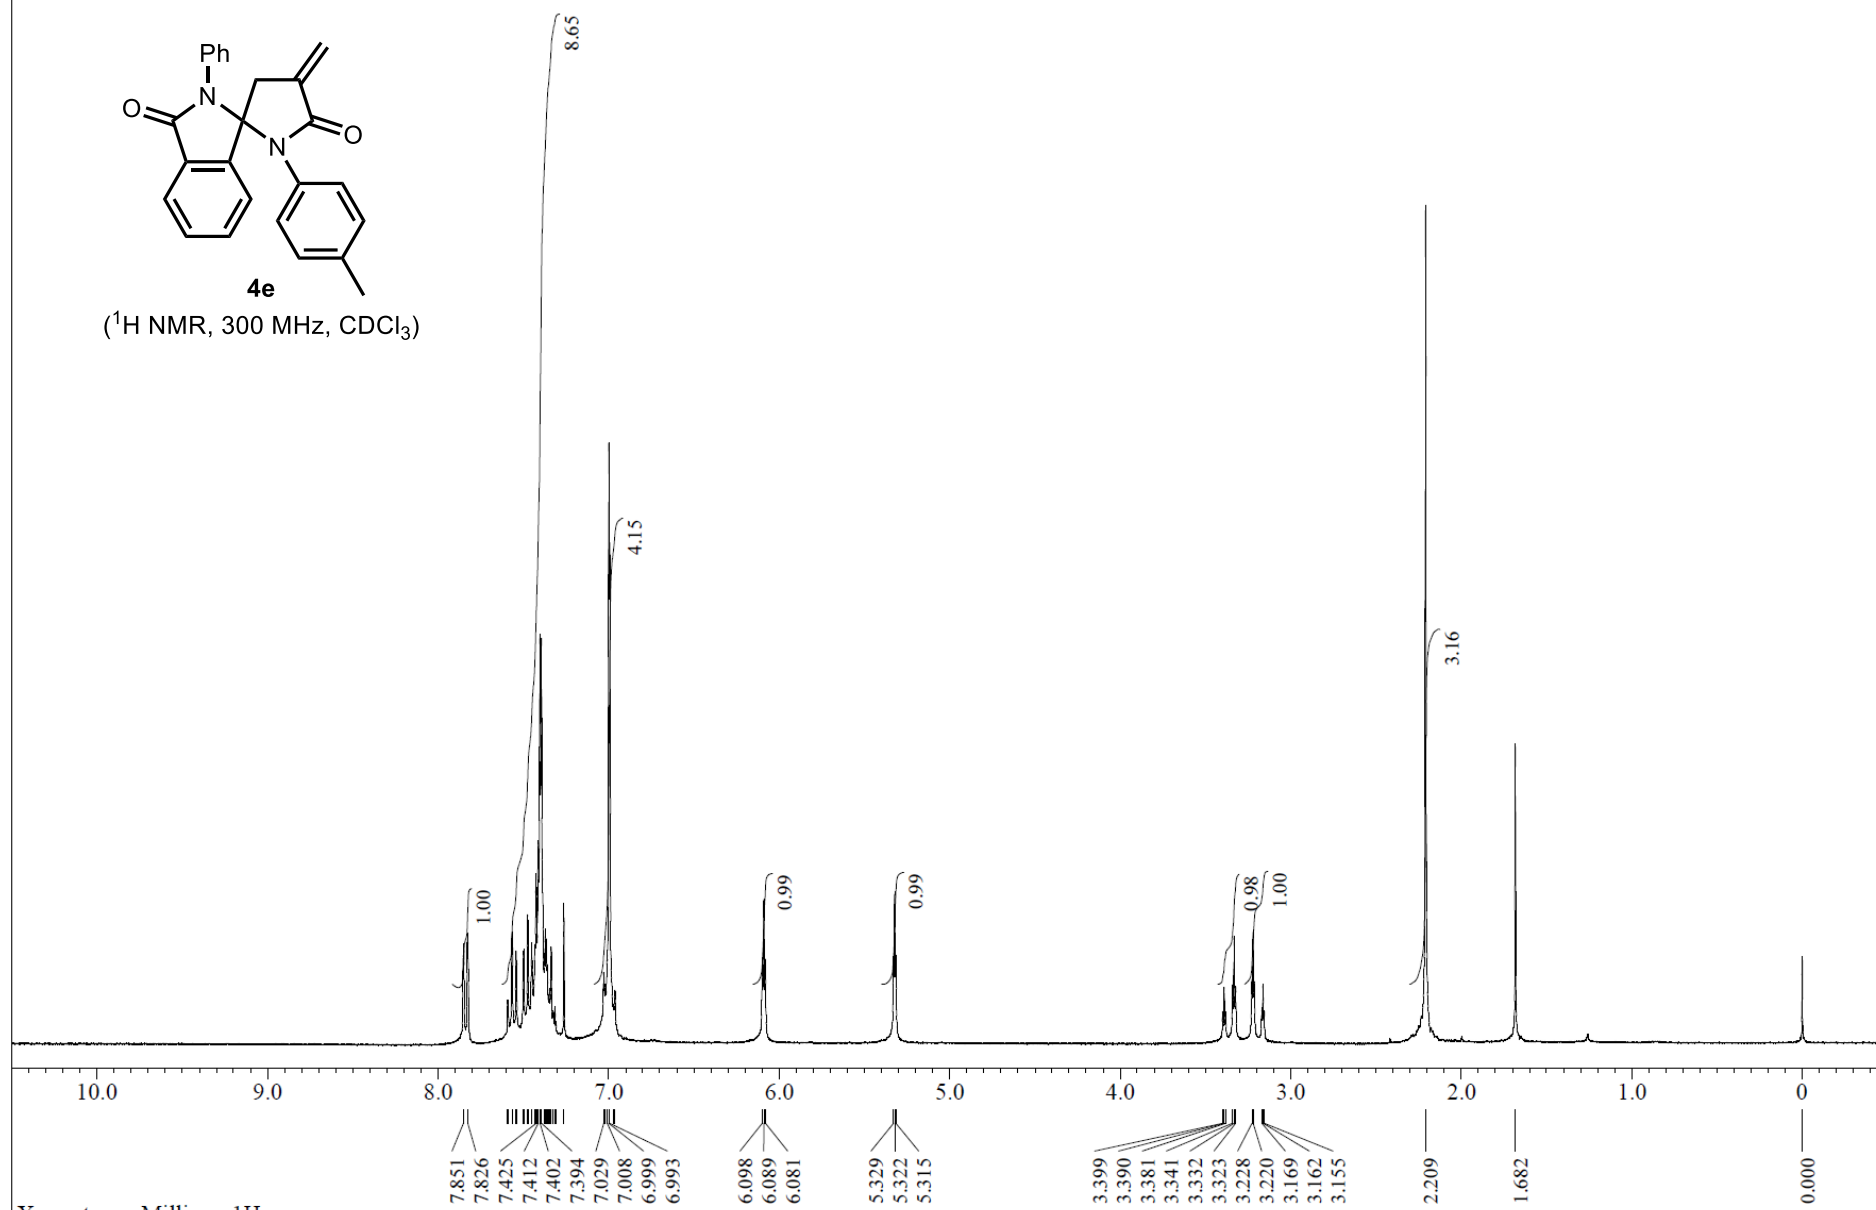

X : parts per Million :  $^1\text{H}$

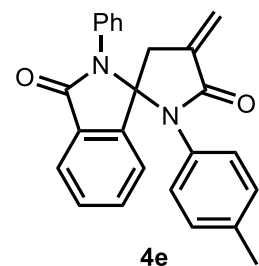

( $^{13}\text{C}$  NMR, 75 MHz,  $\text{CDCl}_3$ )

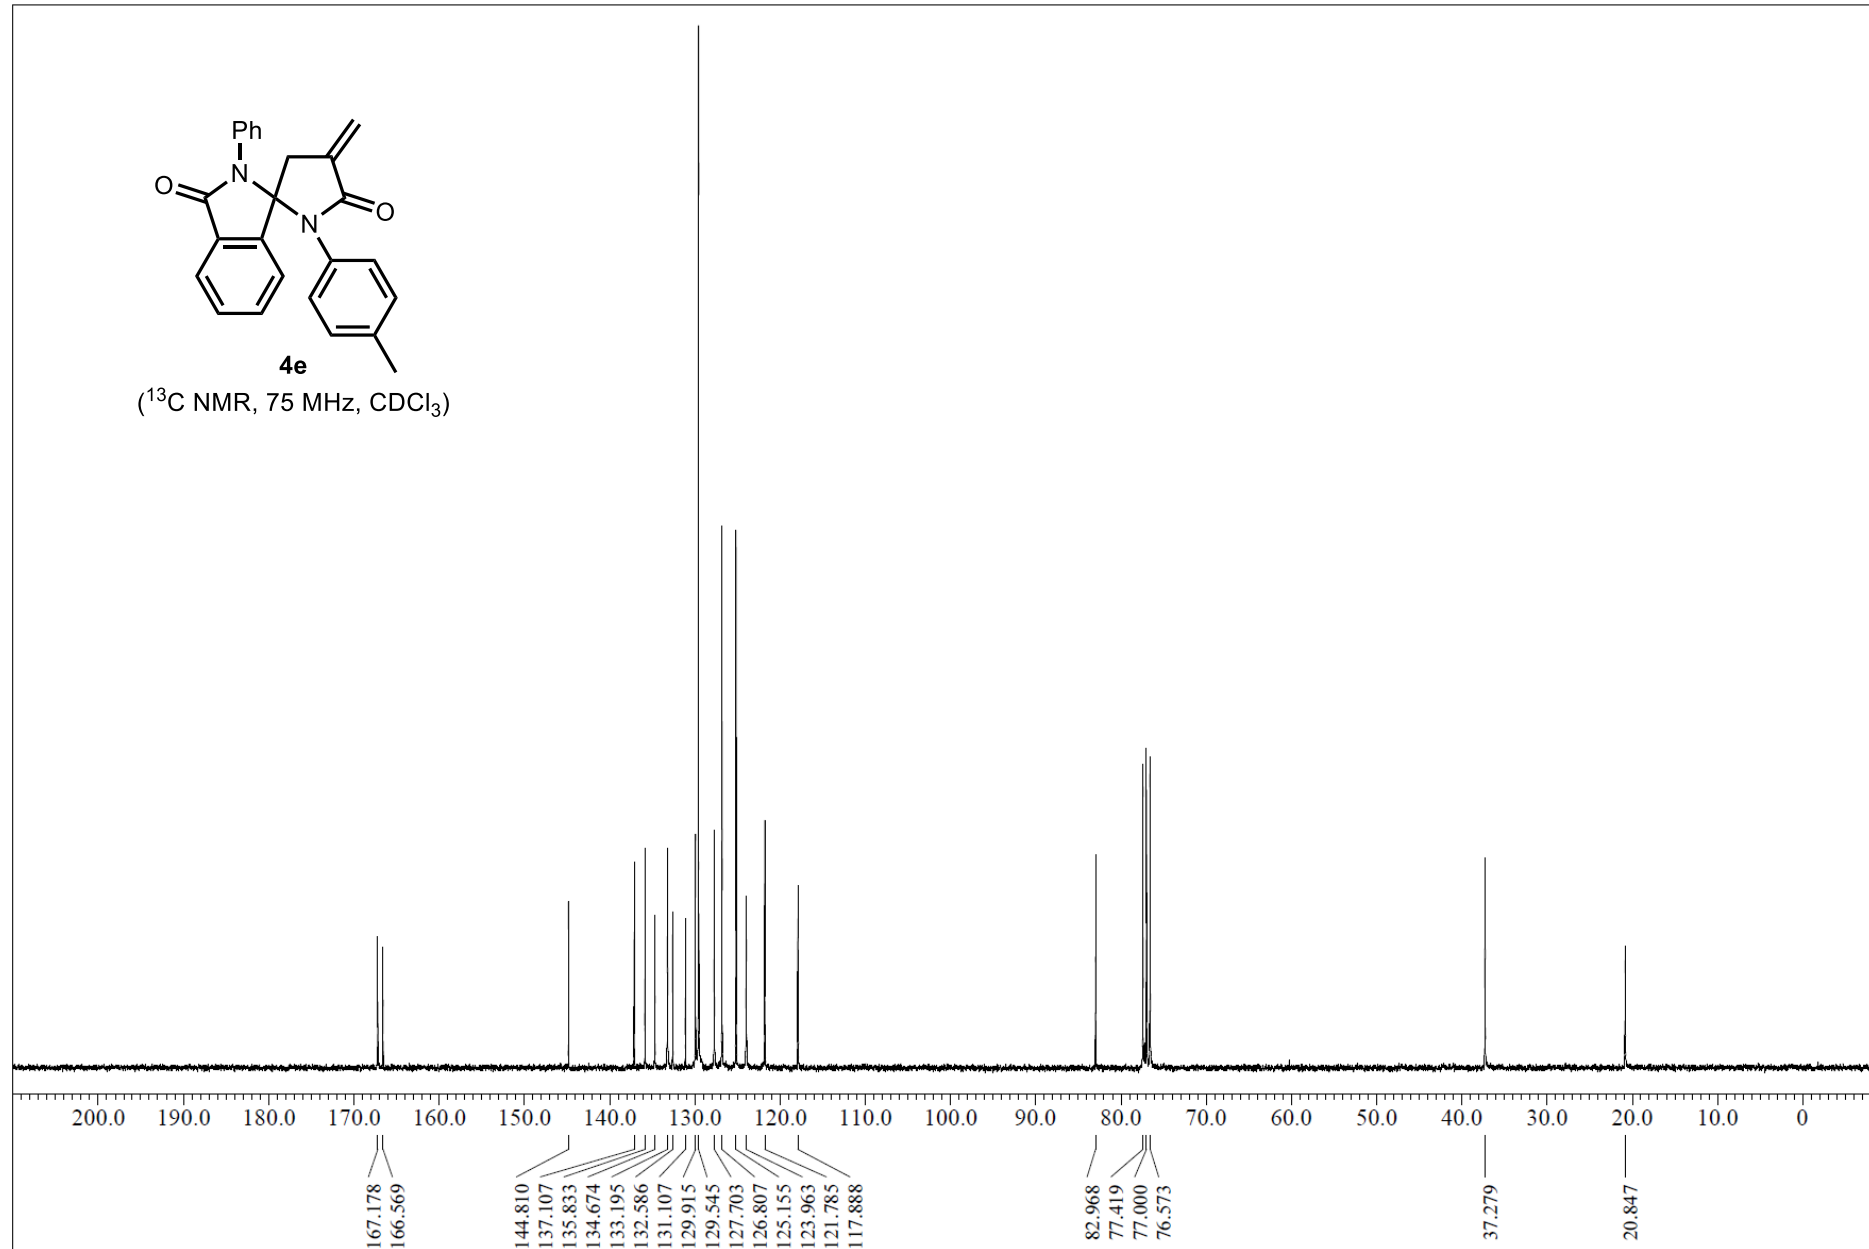

X : parts per Million :  $^{13}\text{C}$



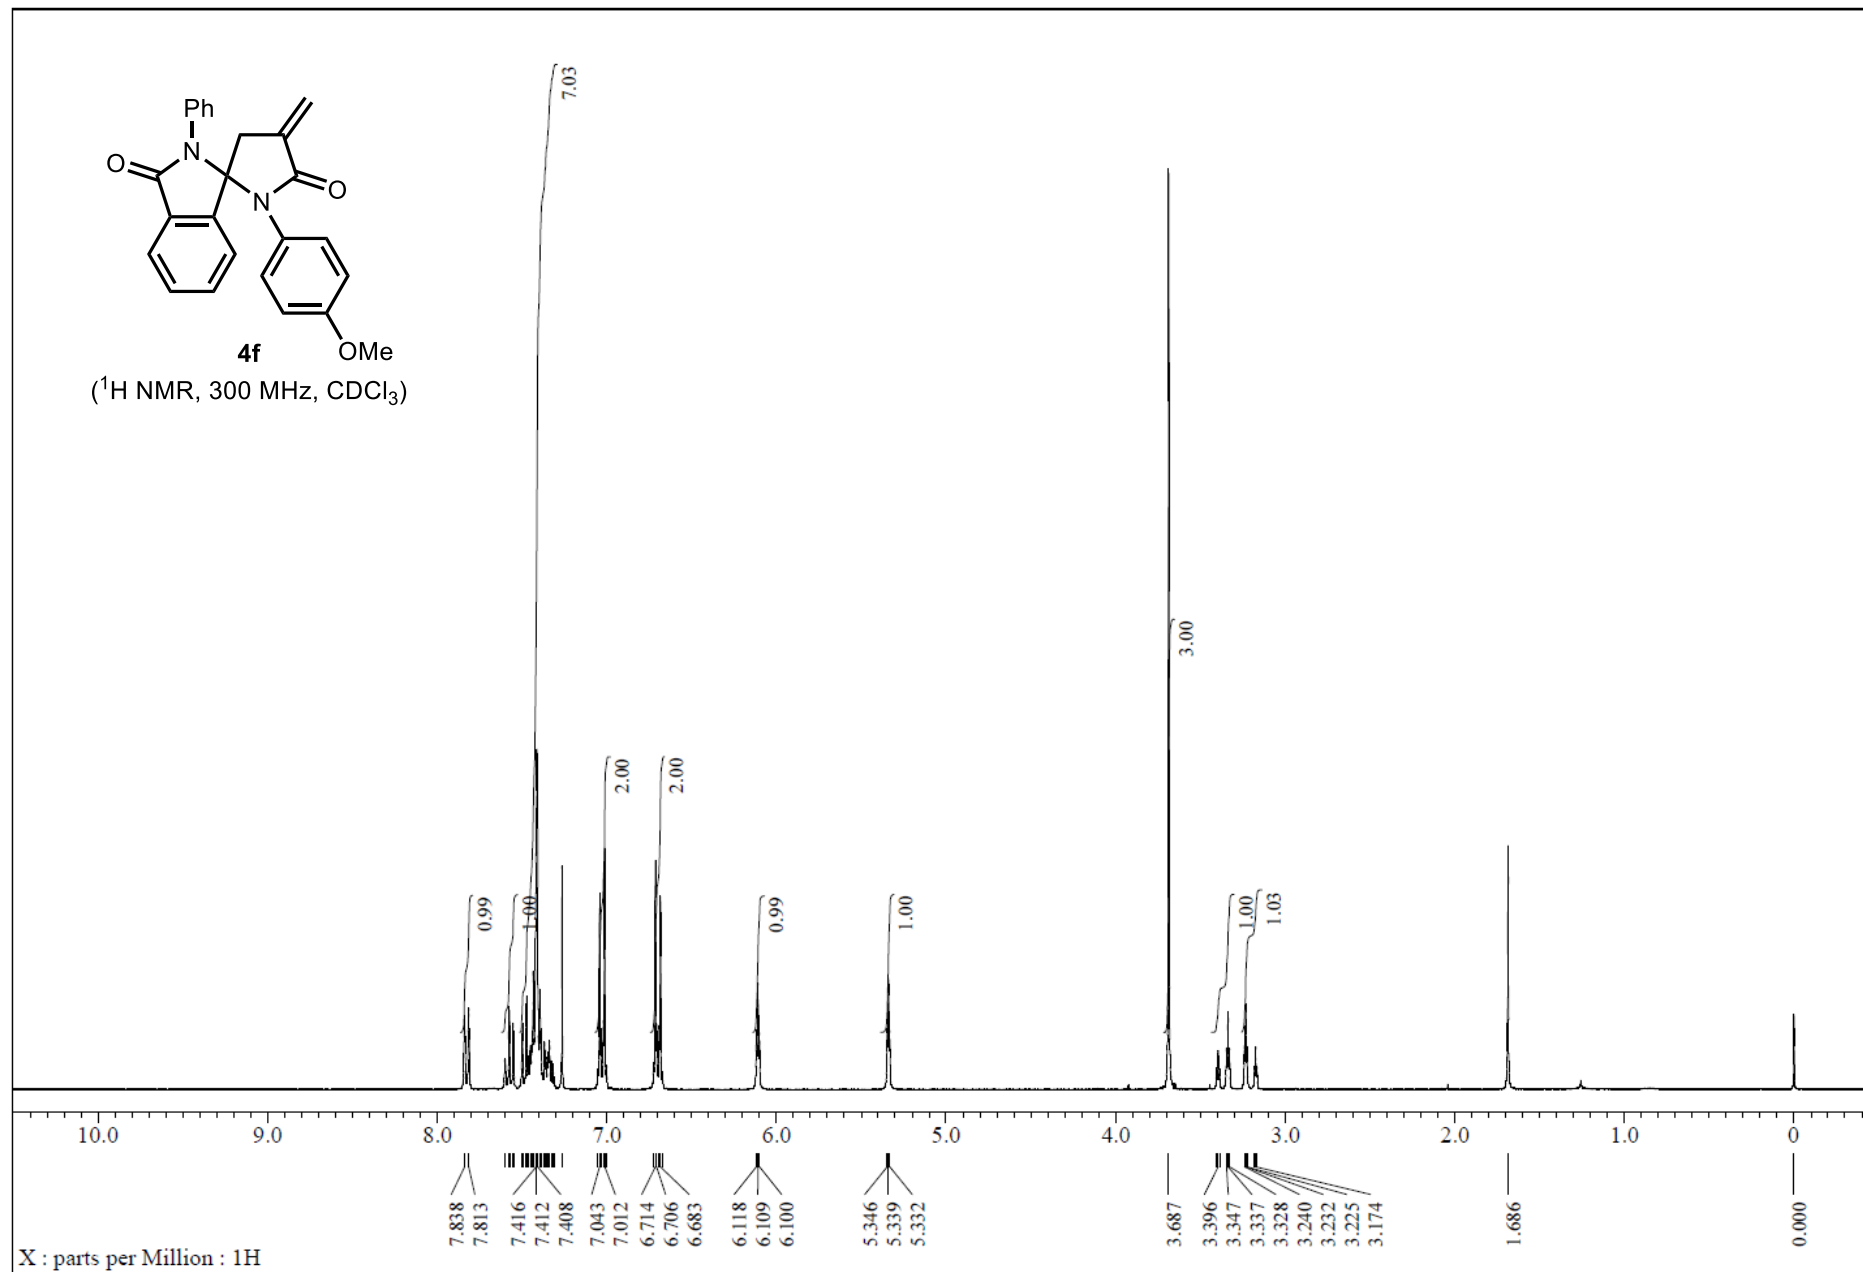

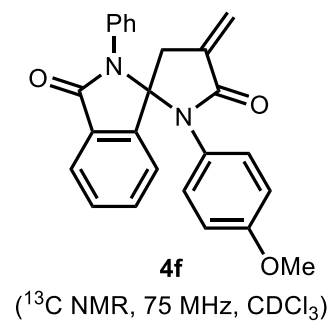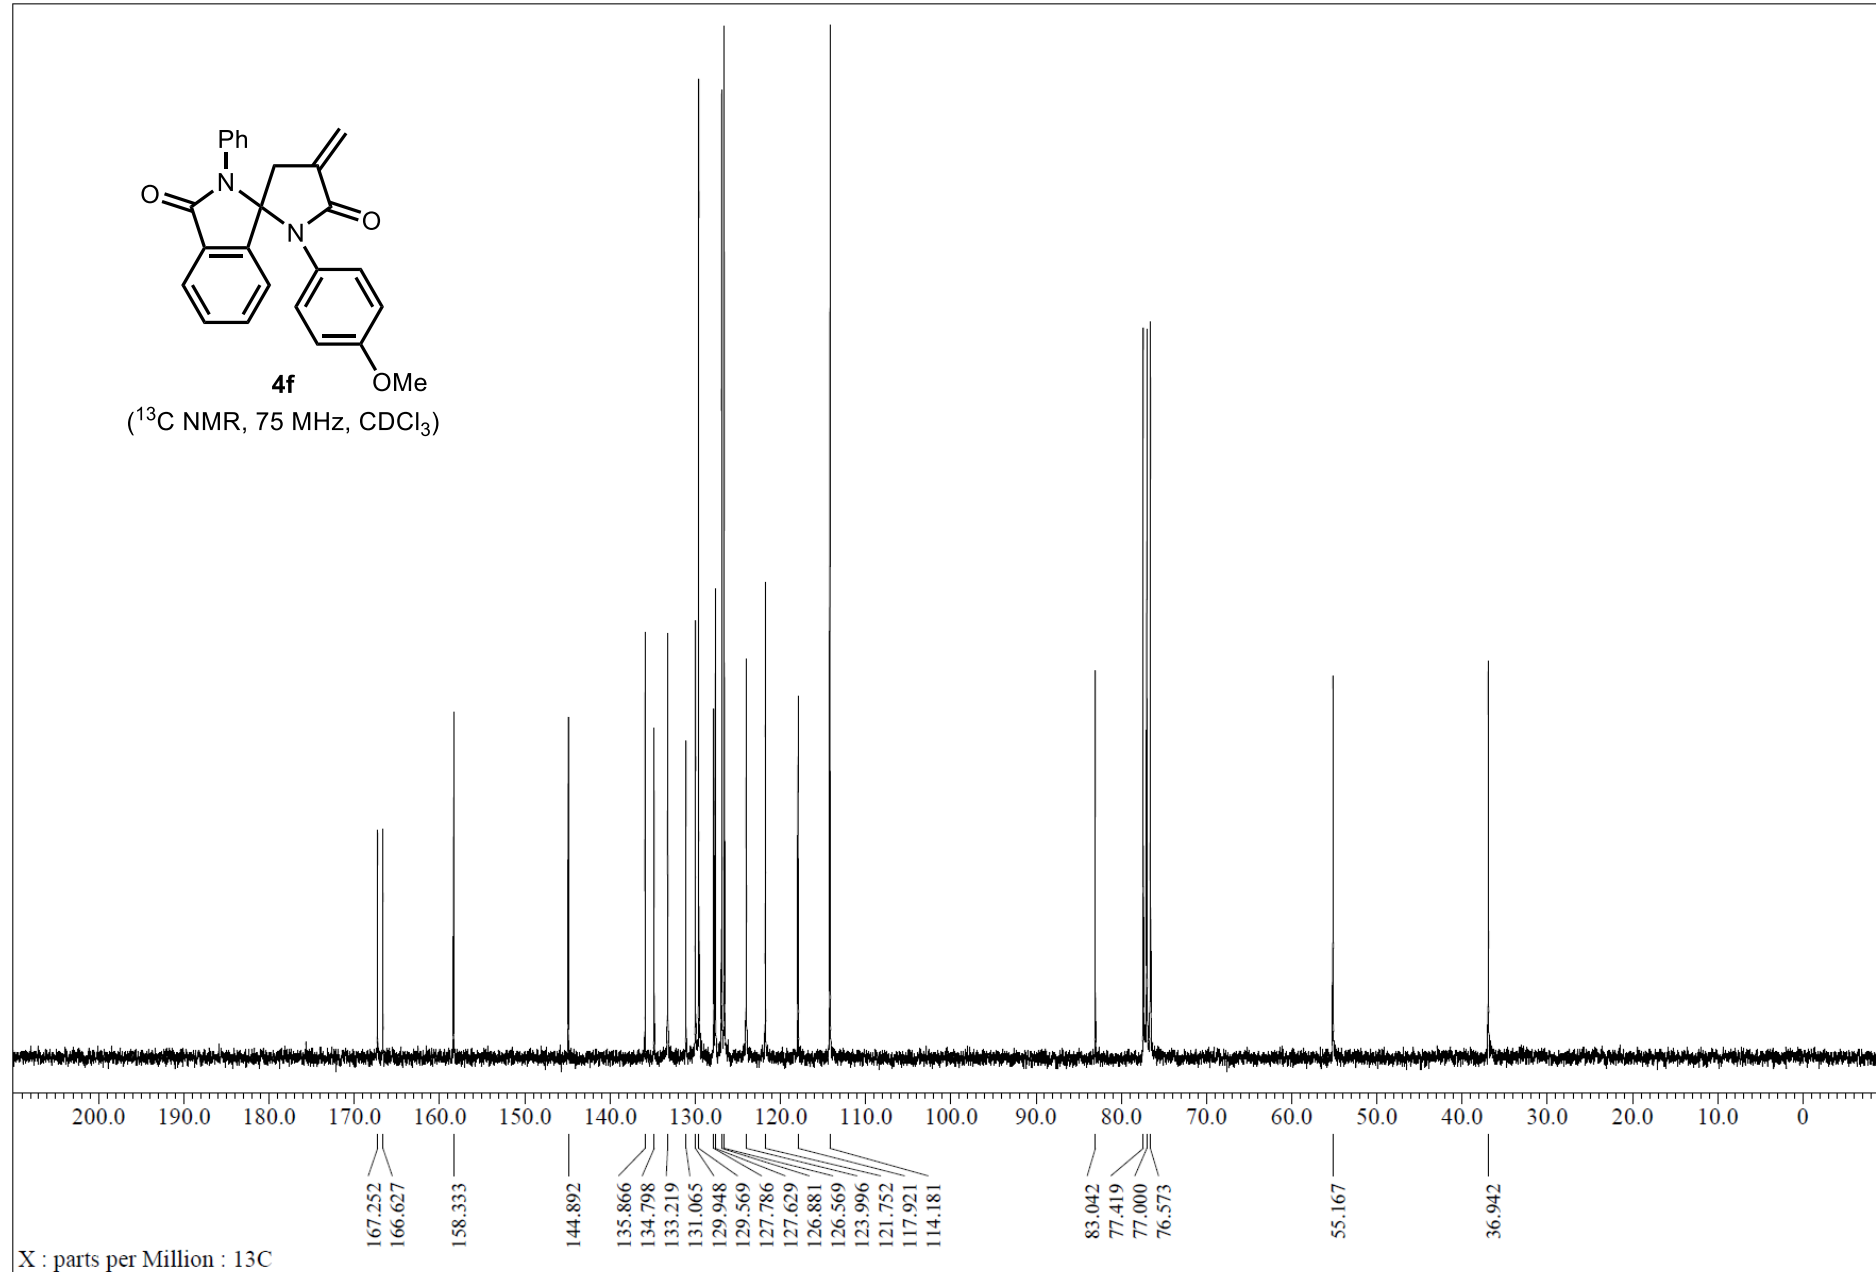

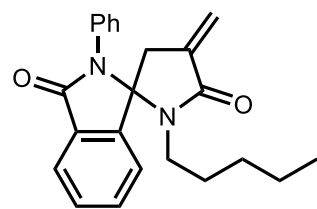

**4g**

( $^1\text{H}$  NMR, 300 MHz,  $\text{CDCl}_3$ )

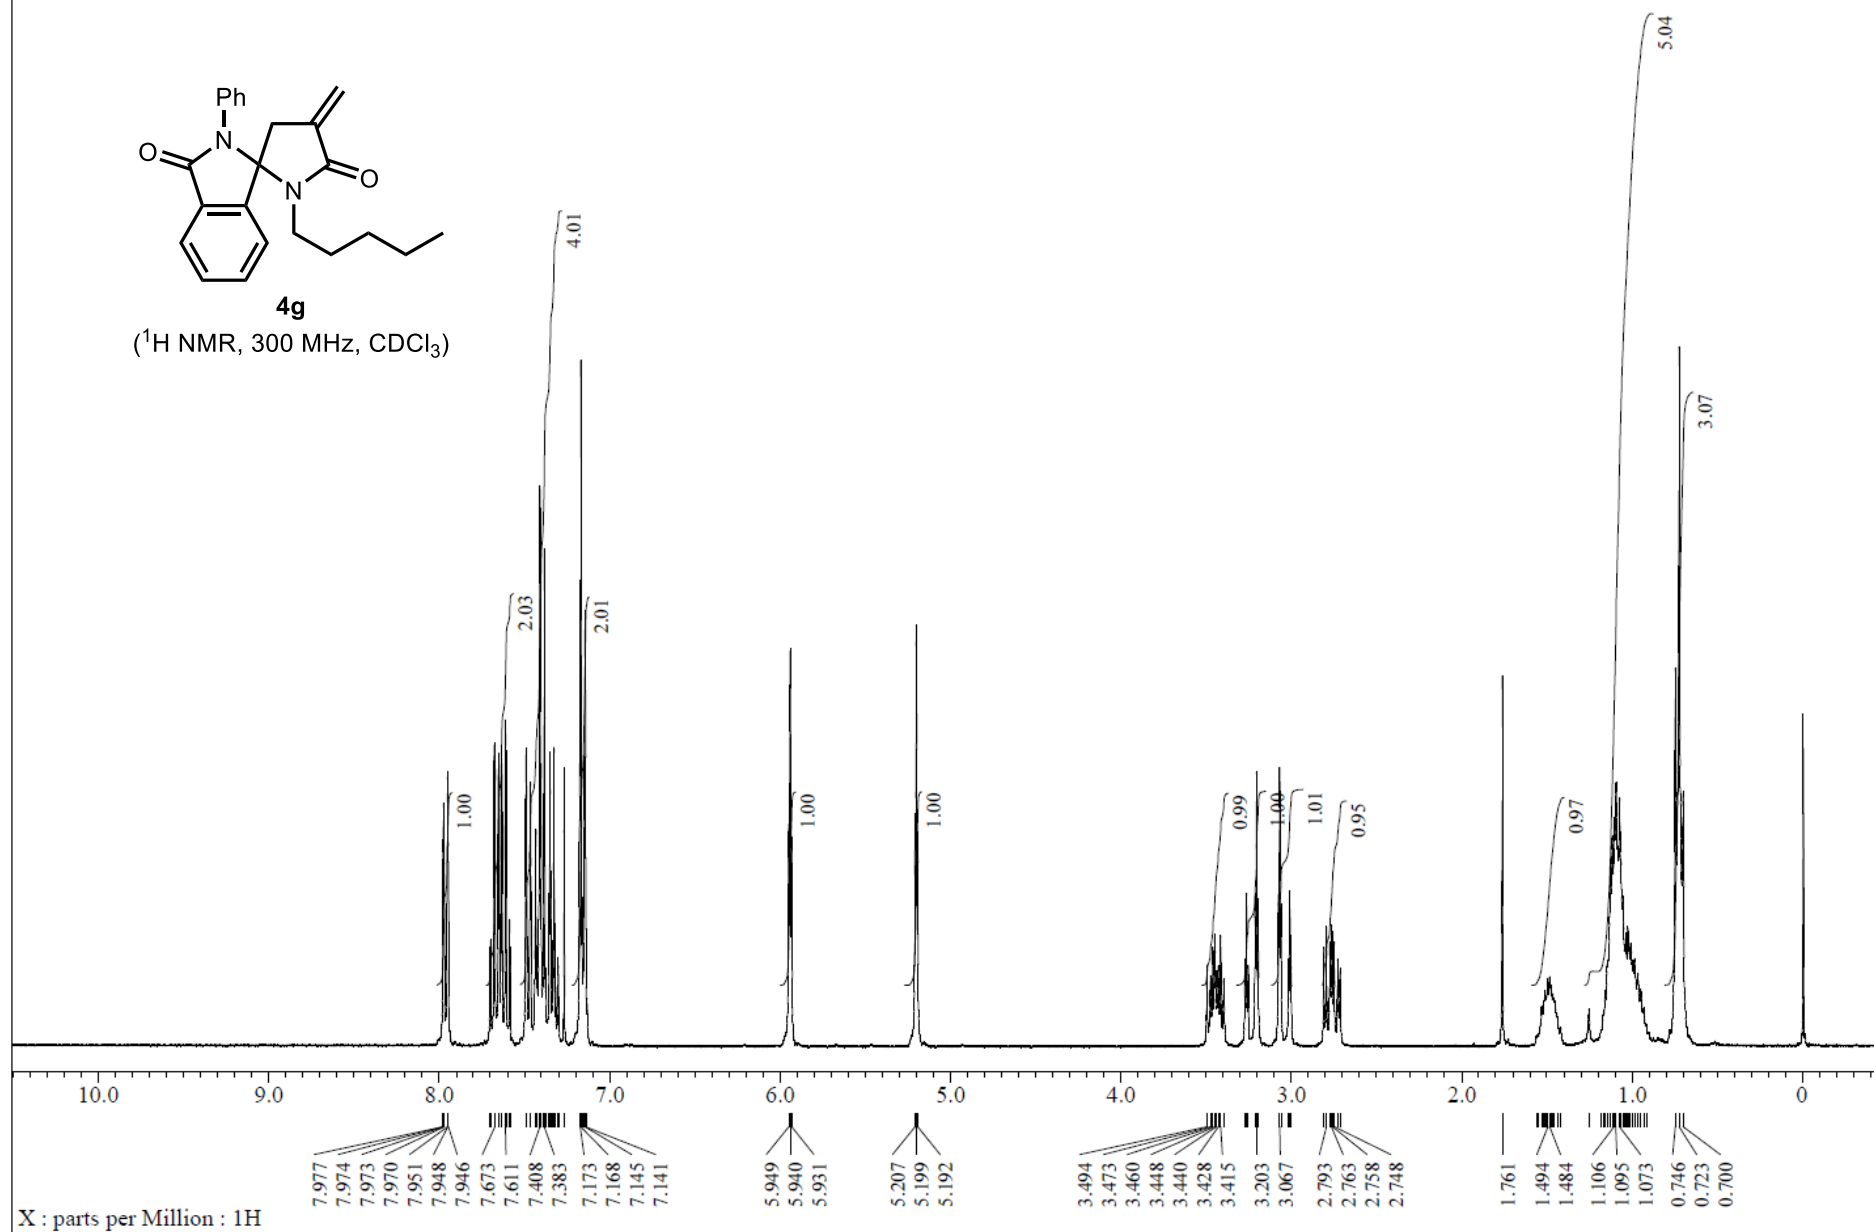

X : parts per Million :  $^1\text{H}$

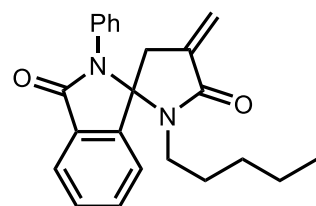

**4g**

( $^{13}\text{C}$  NMR, 75 MHz,  $\text{CDCl}_3$ )

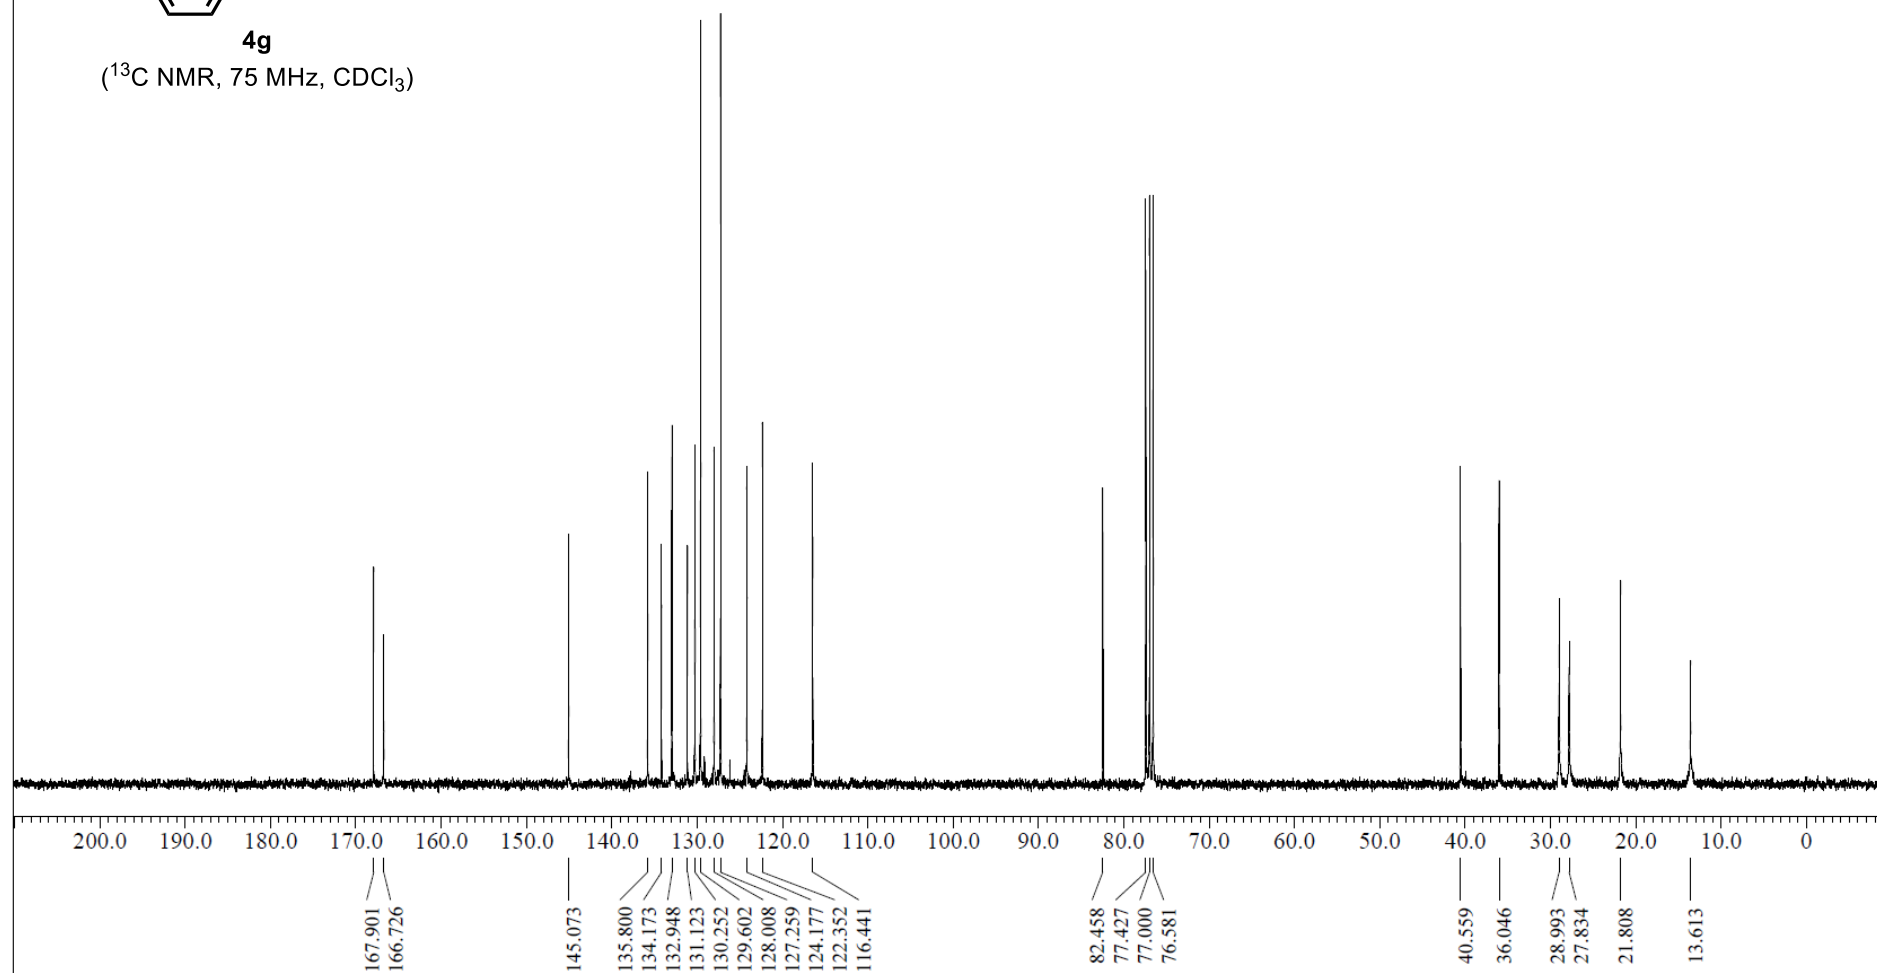

X : parts per Million :  $^{13}\text{C}$

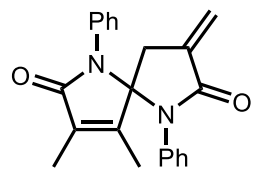

**4h**

( $^1\text{H}$  NMR, 300 MHz,  $\text{CDCl}_3$ )

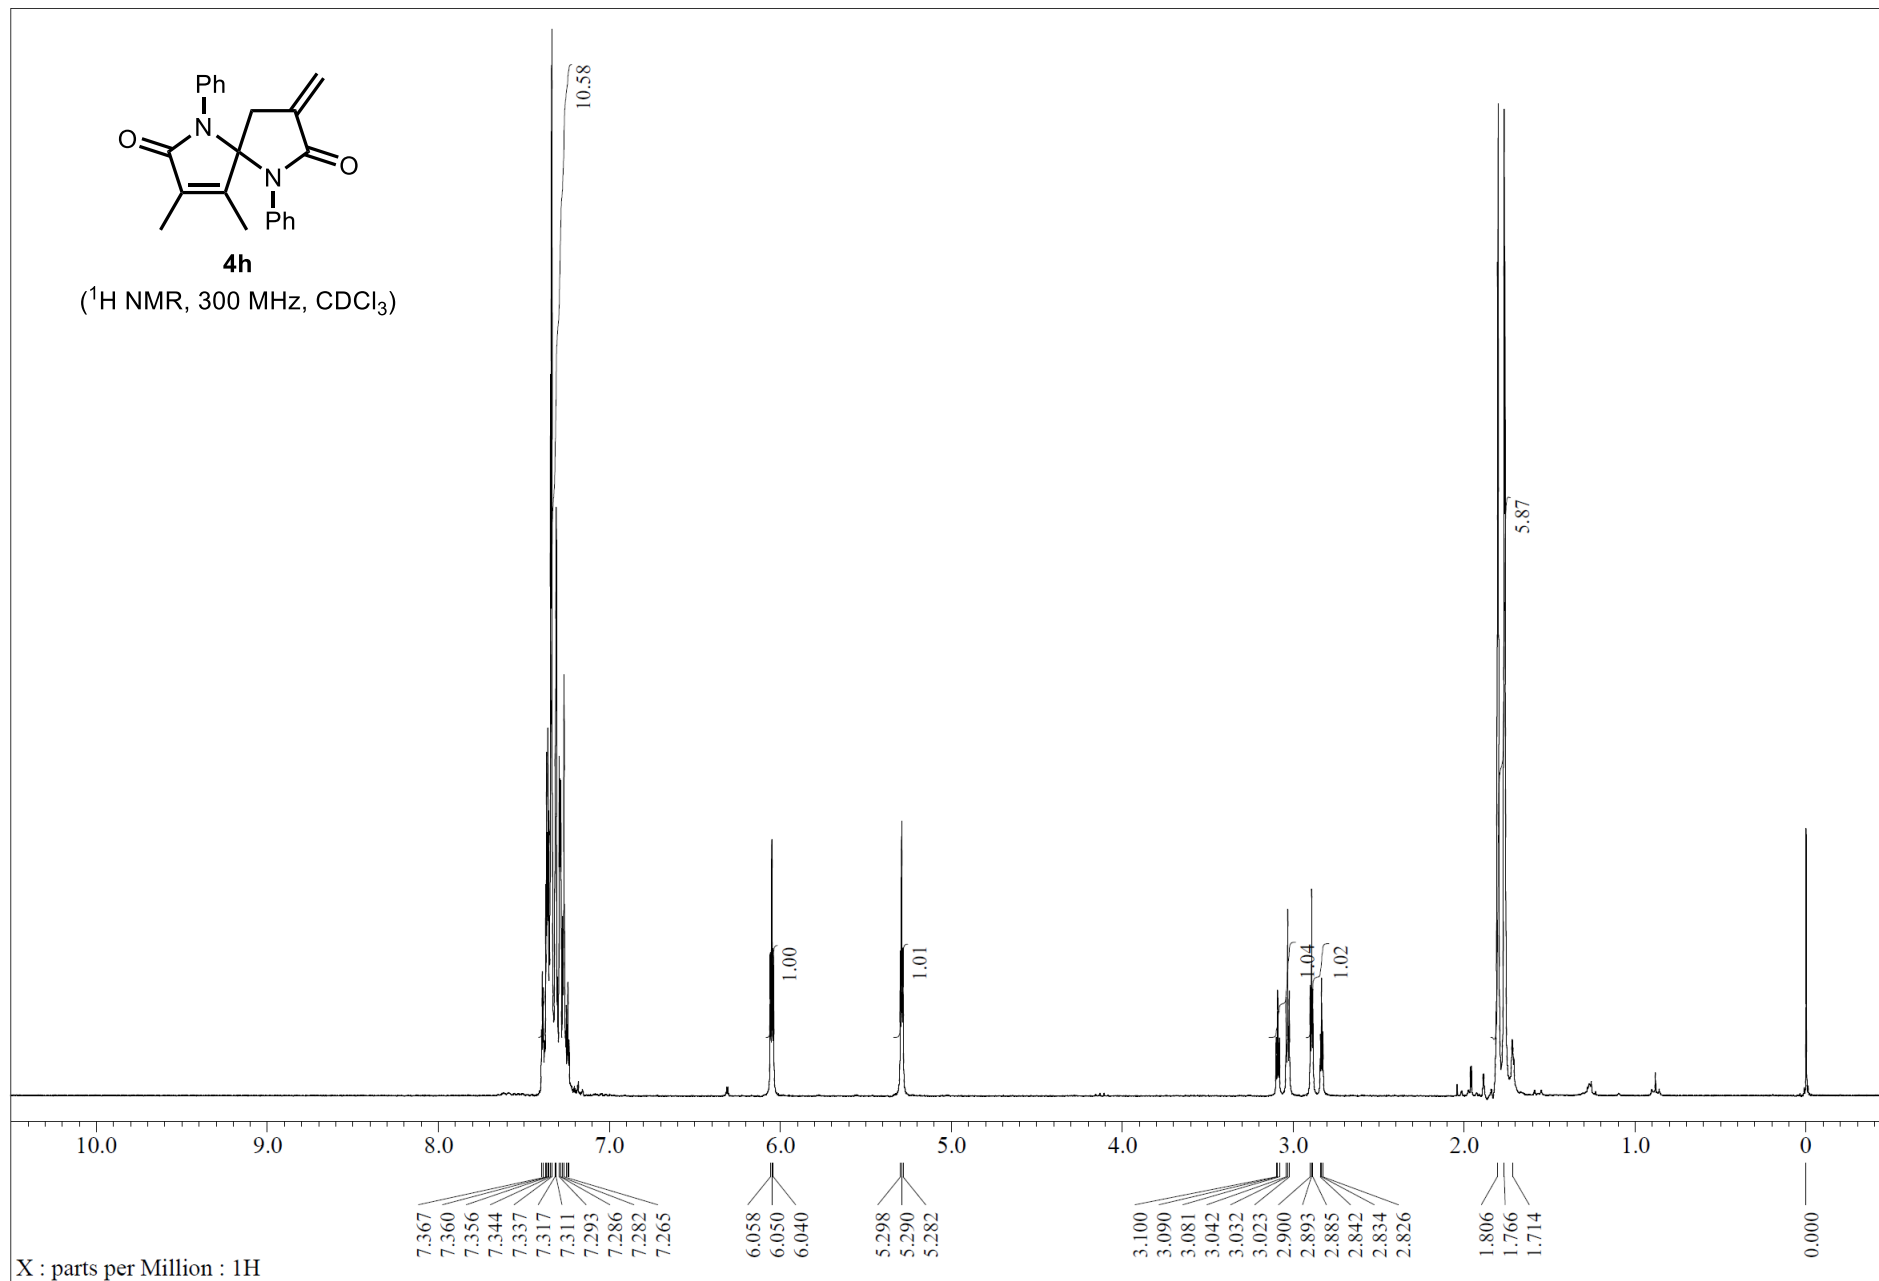

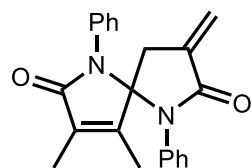

**4h**

( $^{13}\text{C}$  NMR, 75 MHz,  $\text{CDCl}_3$ )

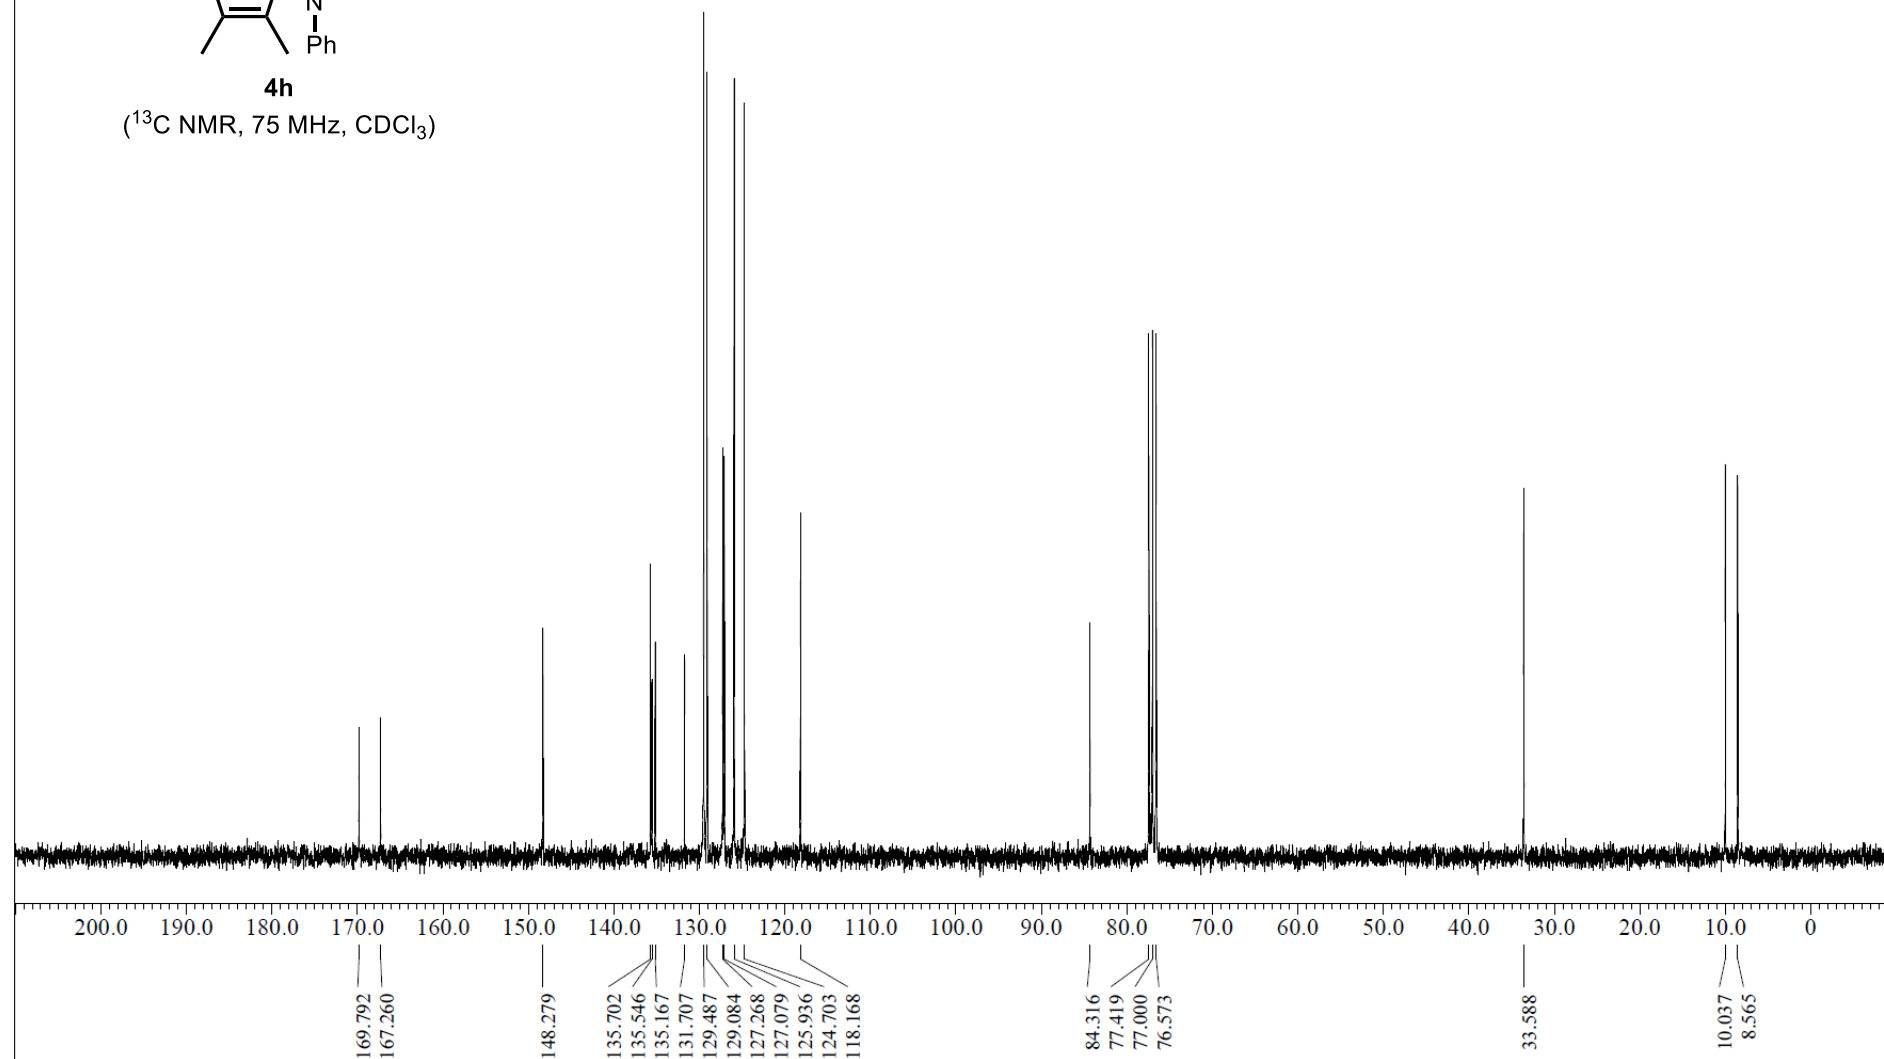

X : parts per Million :  $^{13}\text{C}$

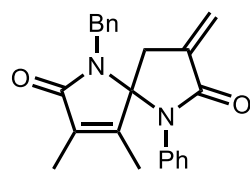

**4i**

(<sup>1</sup>H NMR, 300 MHz, CDCl<sub>3</sub>)

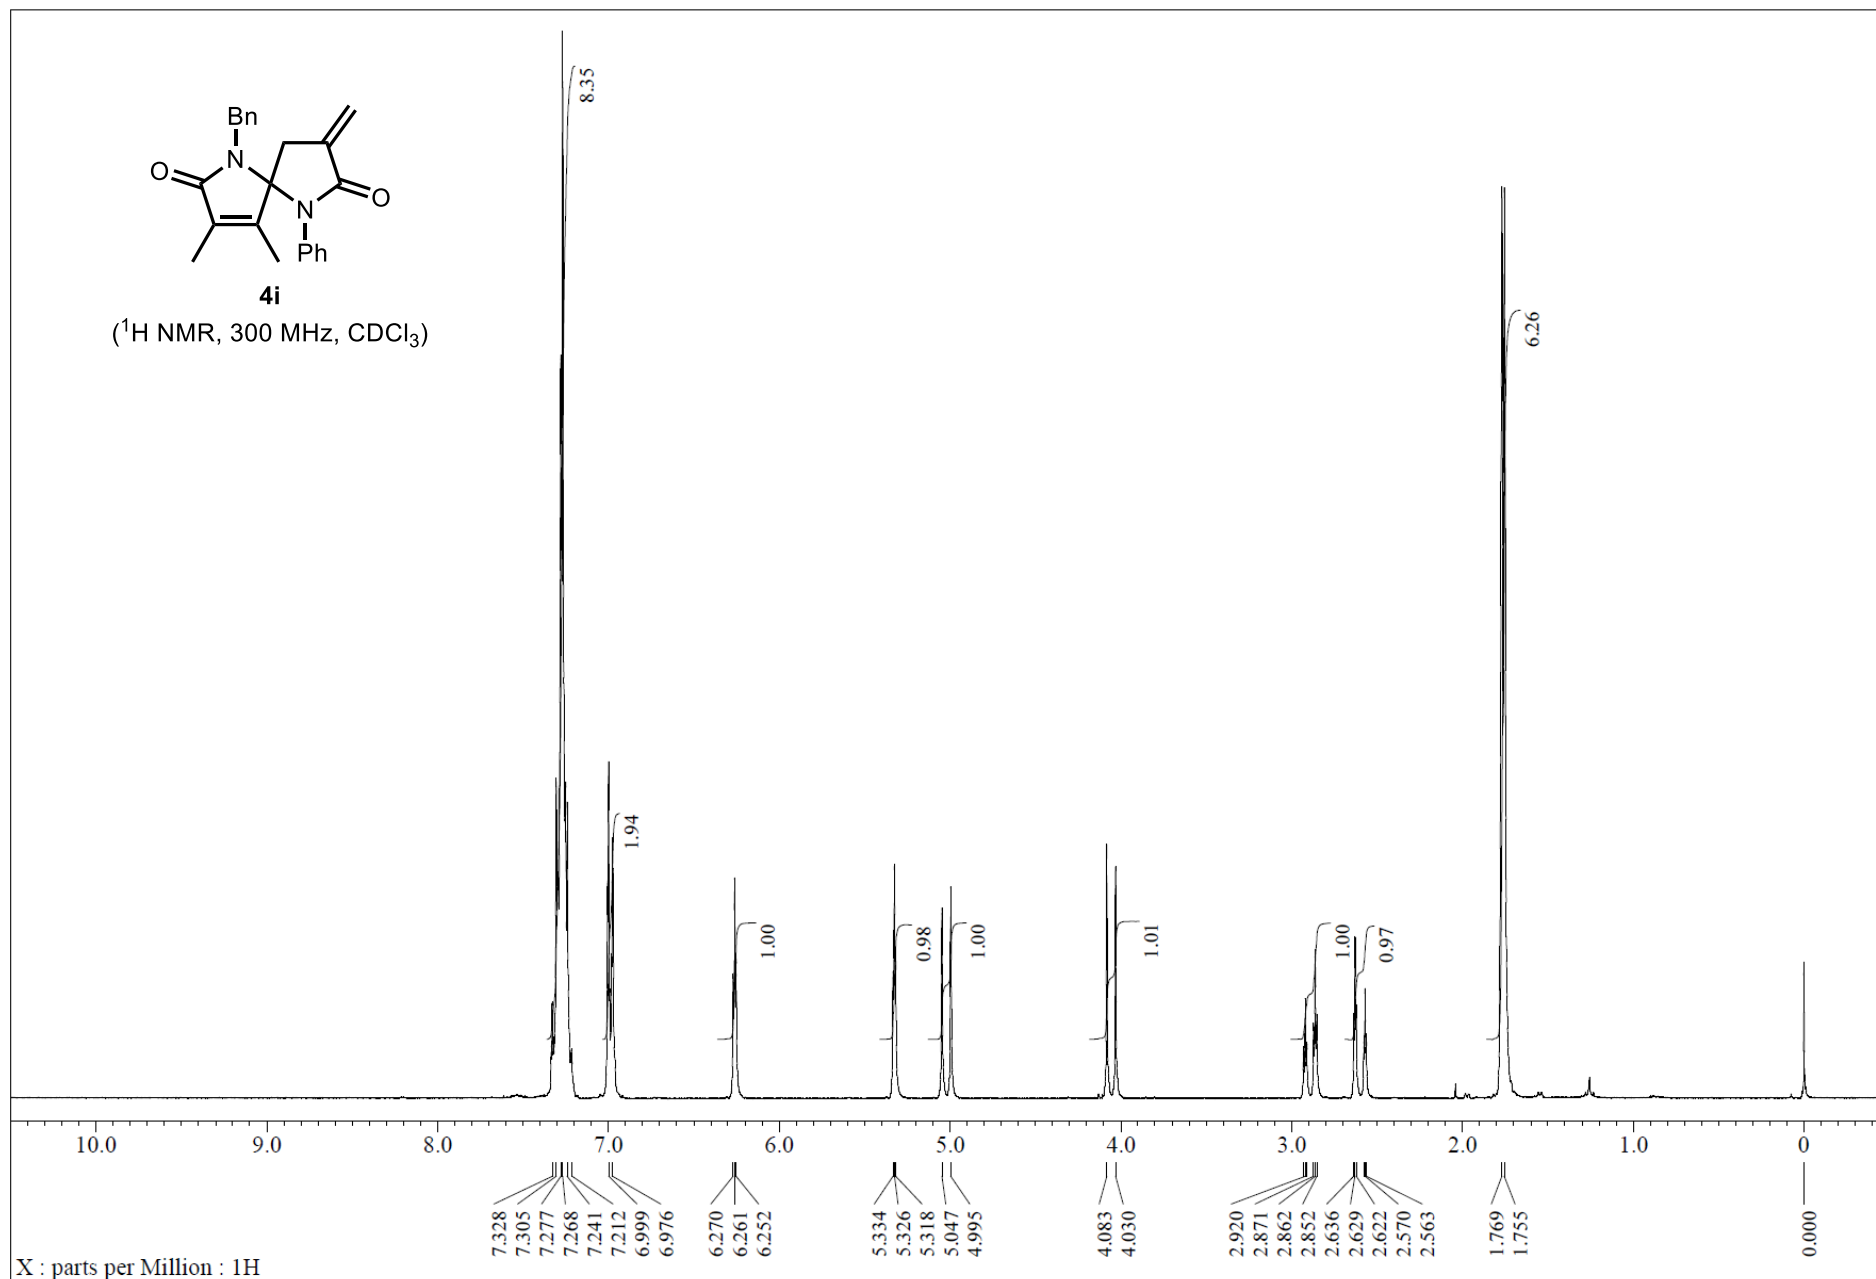

X : parts per Million : 1H

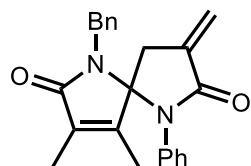

**4i**

( $^{13}\text{C}$  NMR, 75 MHz,  $\text{CDCl}_3$ )

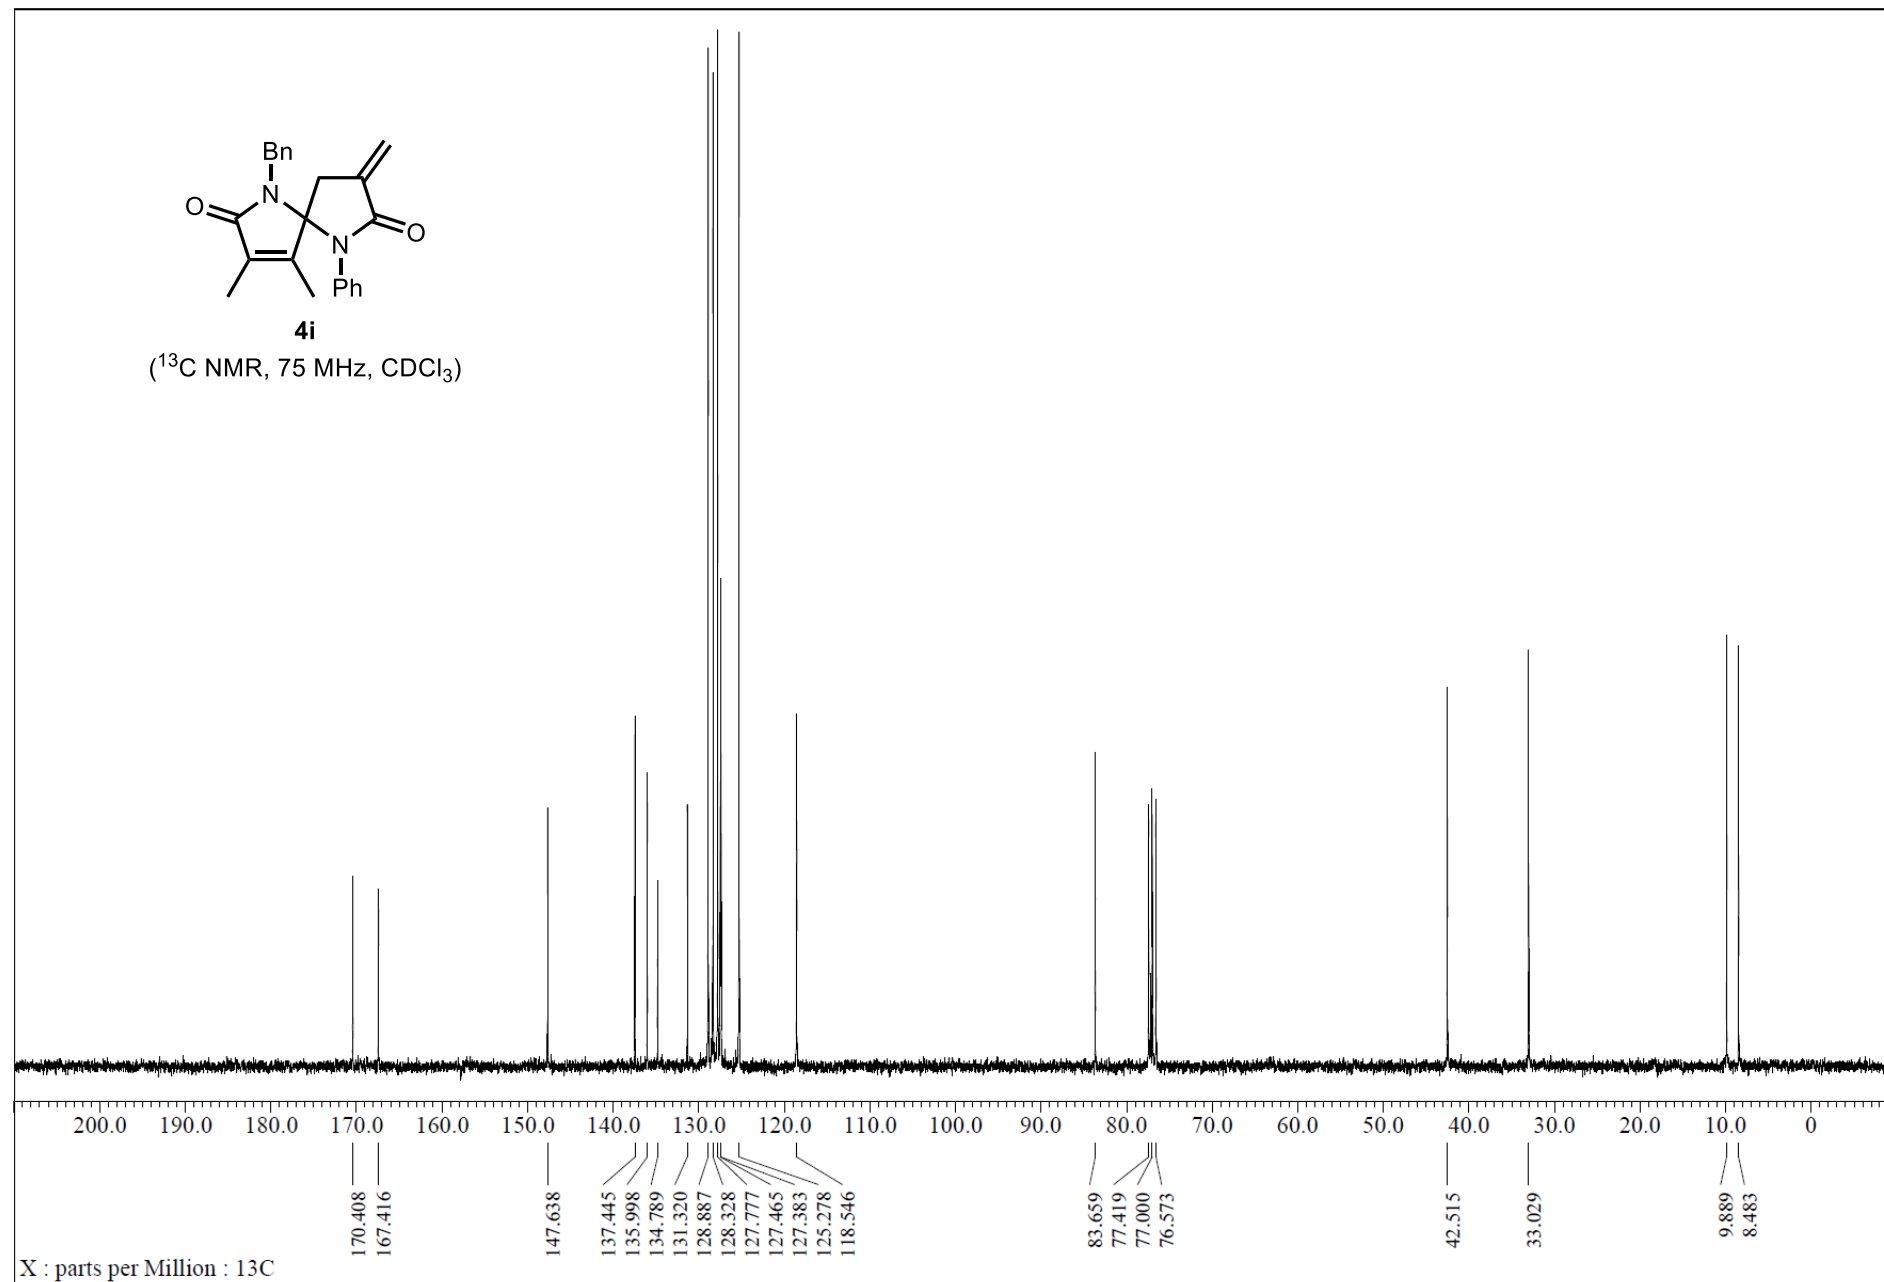

X : parts per Million :  $^{13}\text{C}$



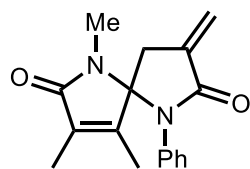

**4j**

( $^1\text{H}$  NMR, 300 MHz,  $\text{CDCl}_3$ )

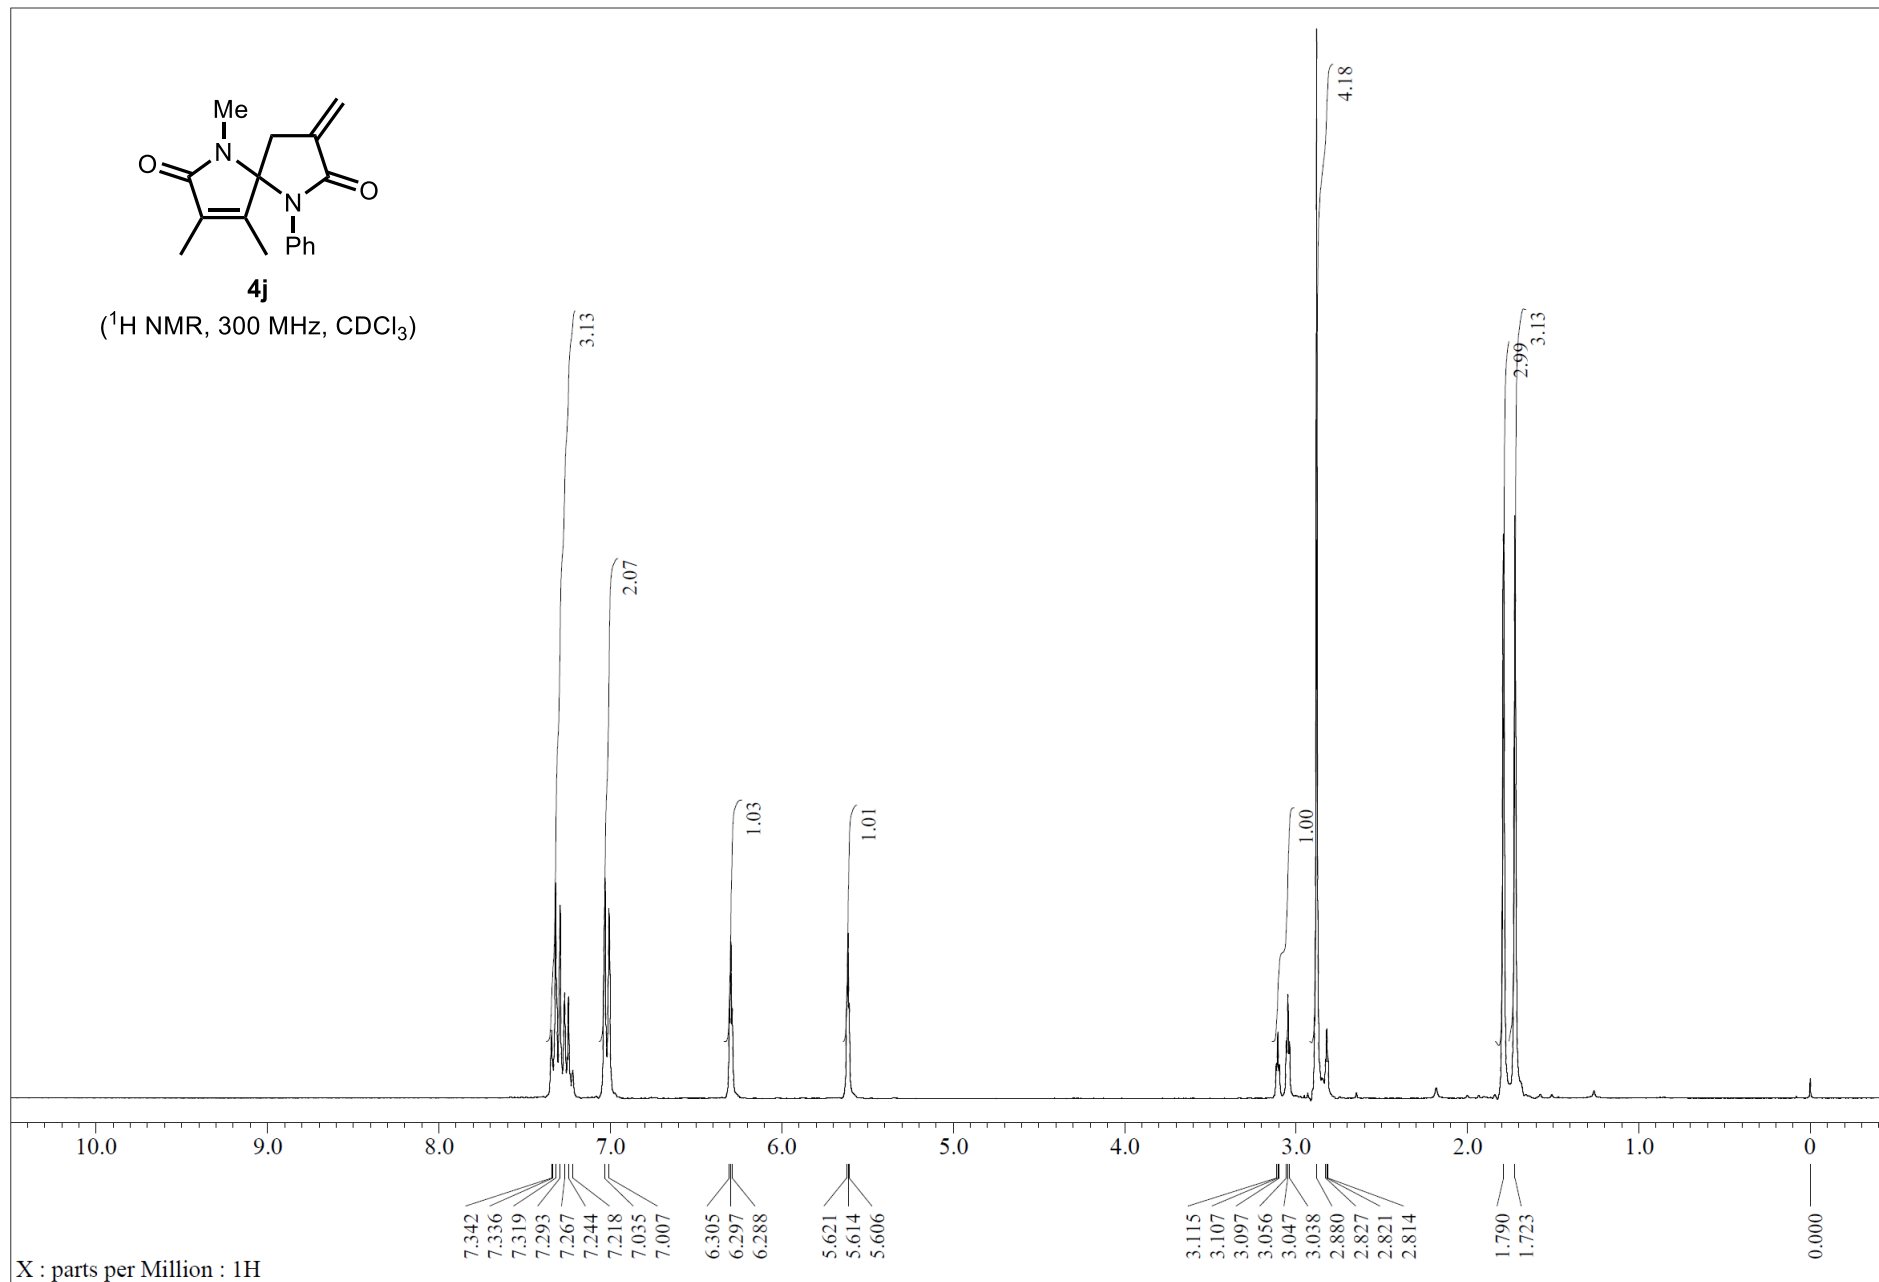

X : parts per Million :  $^1\text{H}$

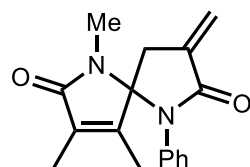

**4j**

( $^{13}\text{C}$  NMR, 75 MHz,  $\text{CDCl}_3$ )

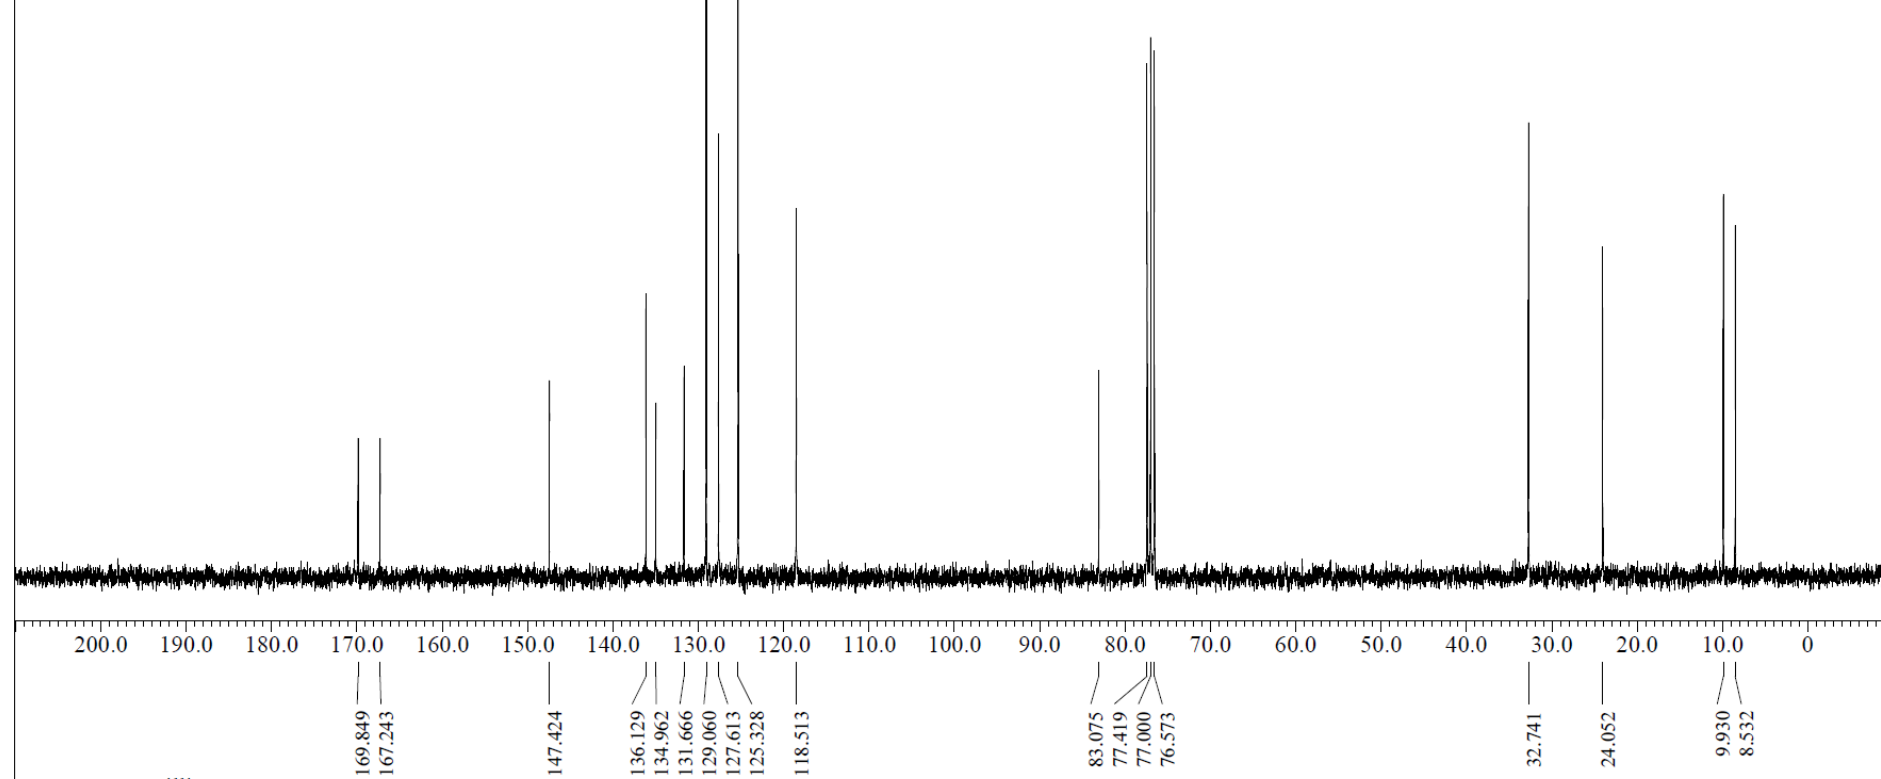

X : parts per Million :  $^{13}\text{C}$

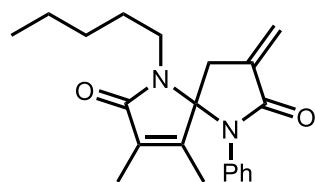

**4k**  
 (<sup>1</sup>H NMR, 300 MHz, CDCl<sub>3</sub>)

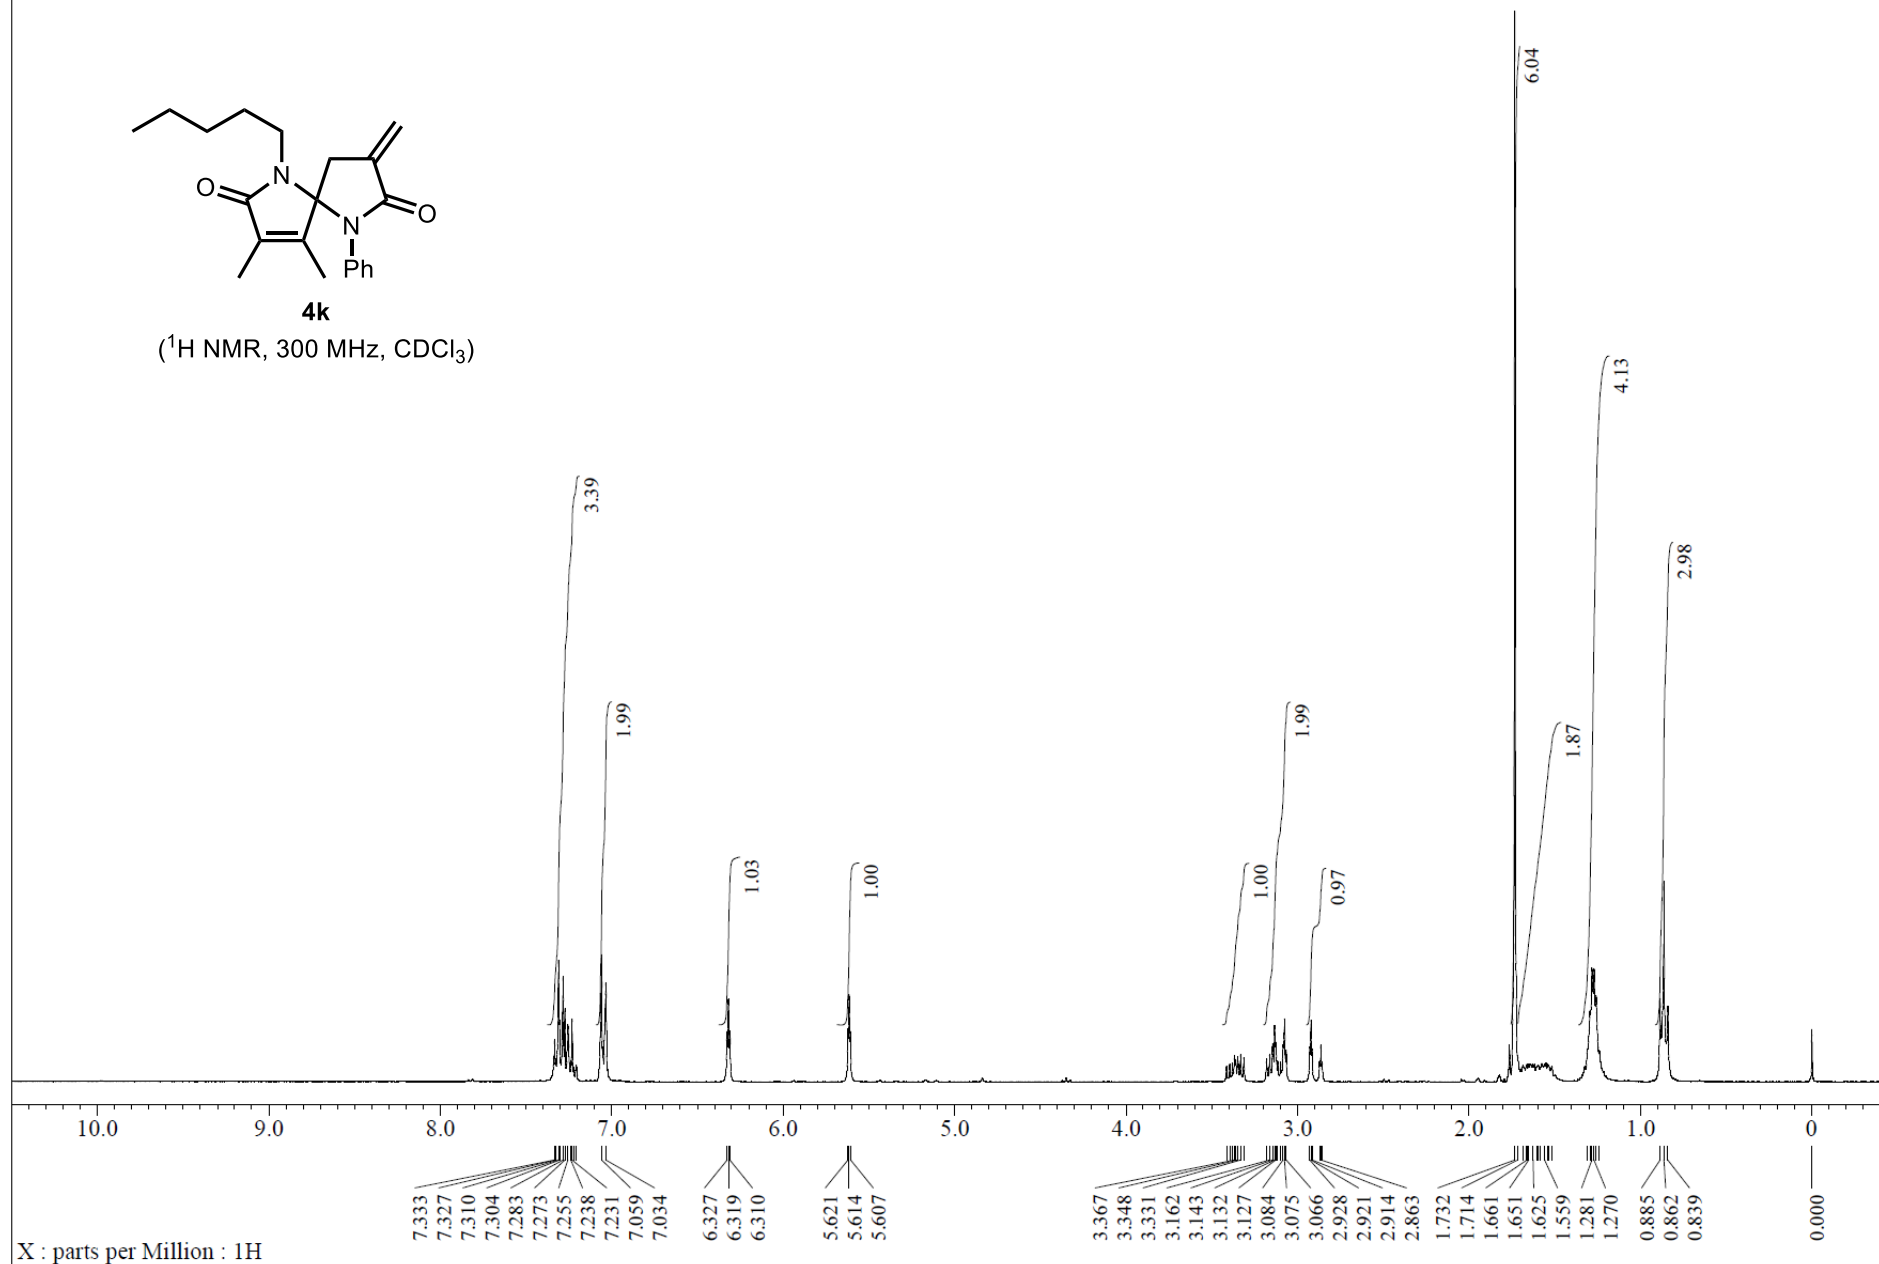

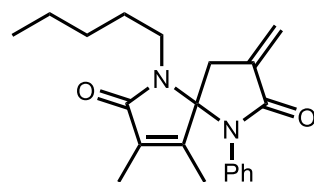

**4k**

(<sup>13</sup>C NMR, 75 MHz, CDCl<sub>3</sub>)

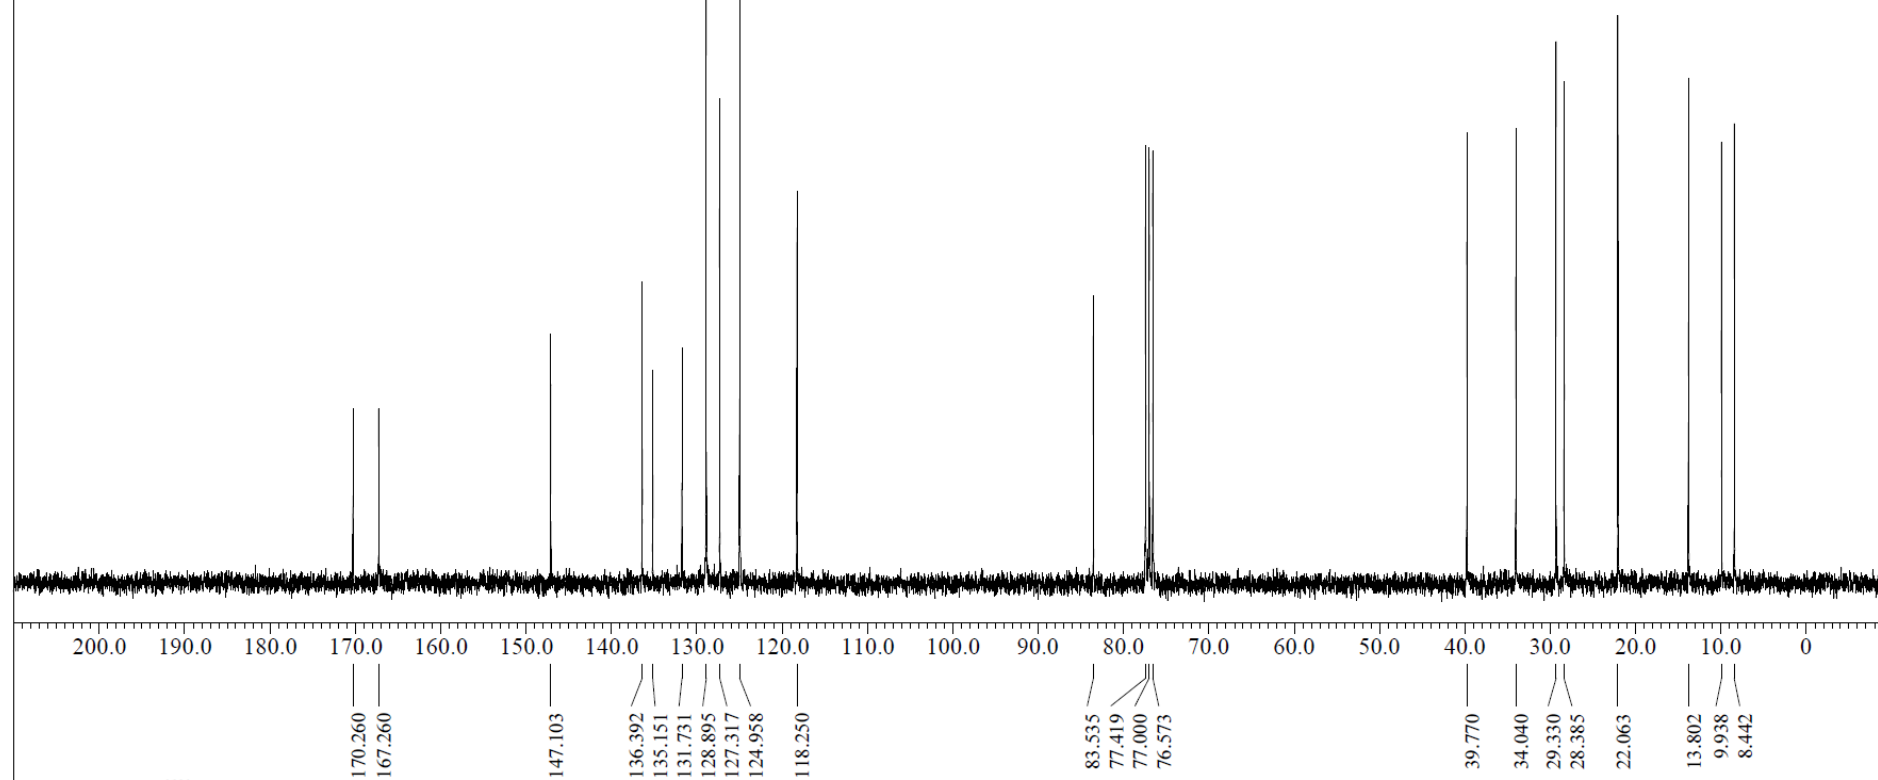

X : parts per Million : 13C

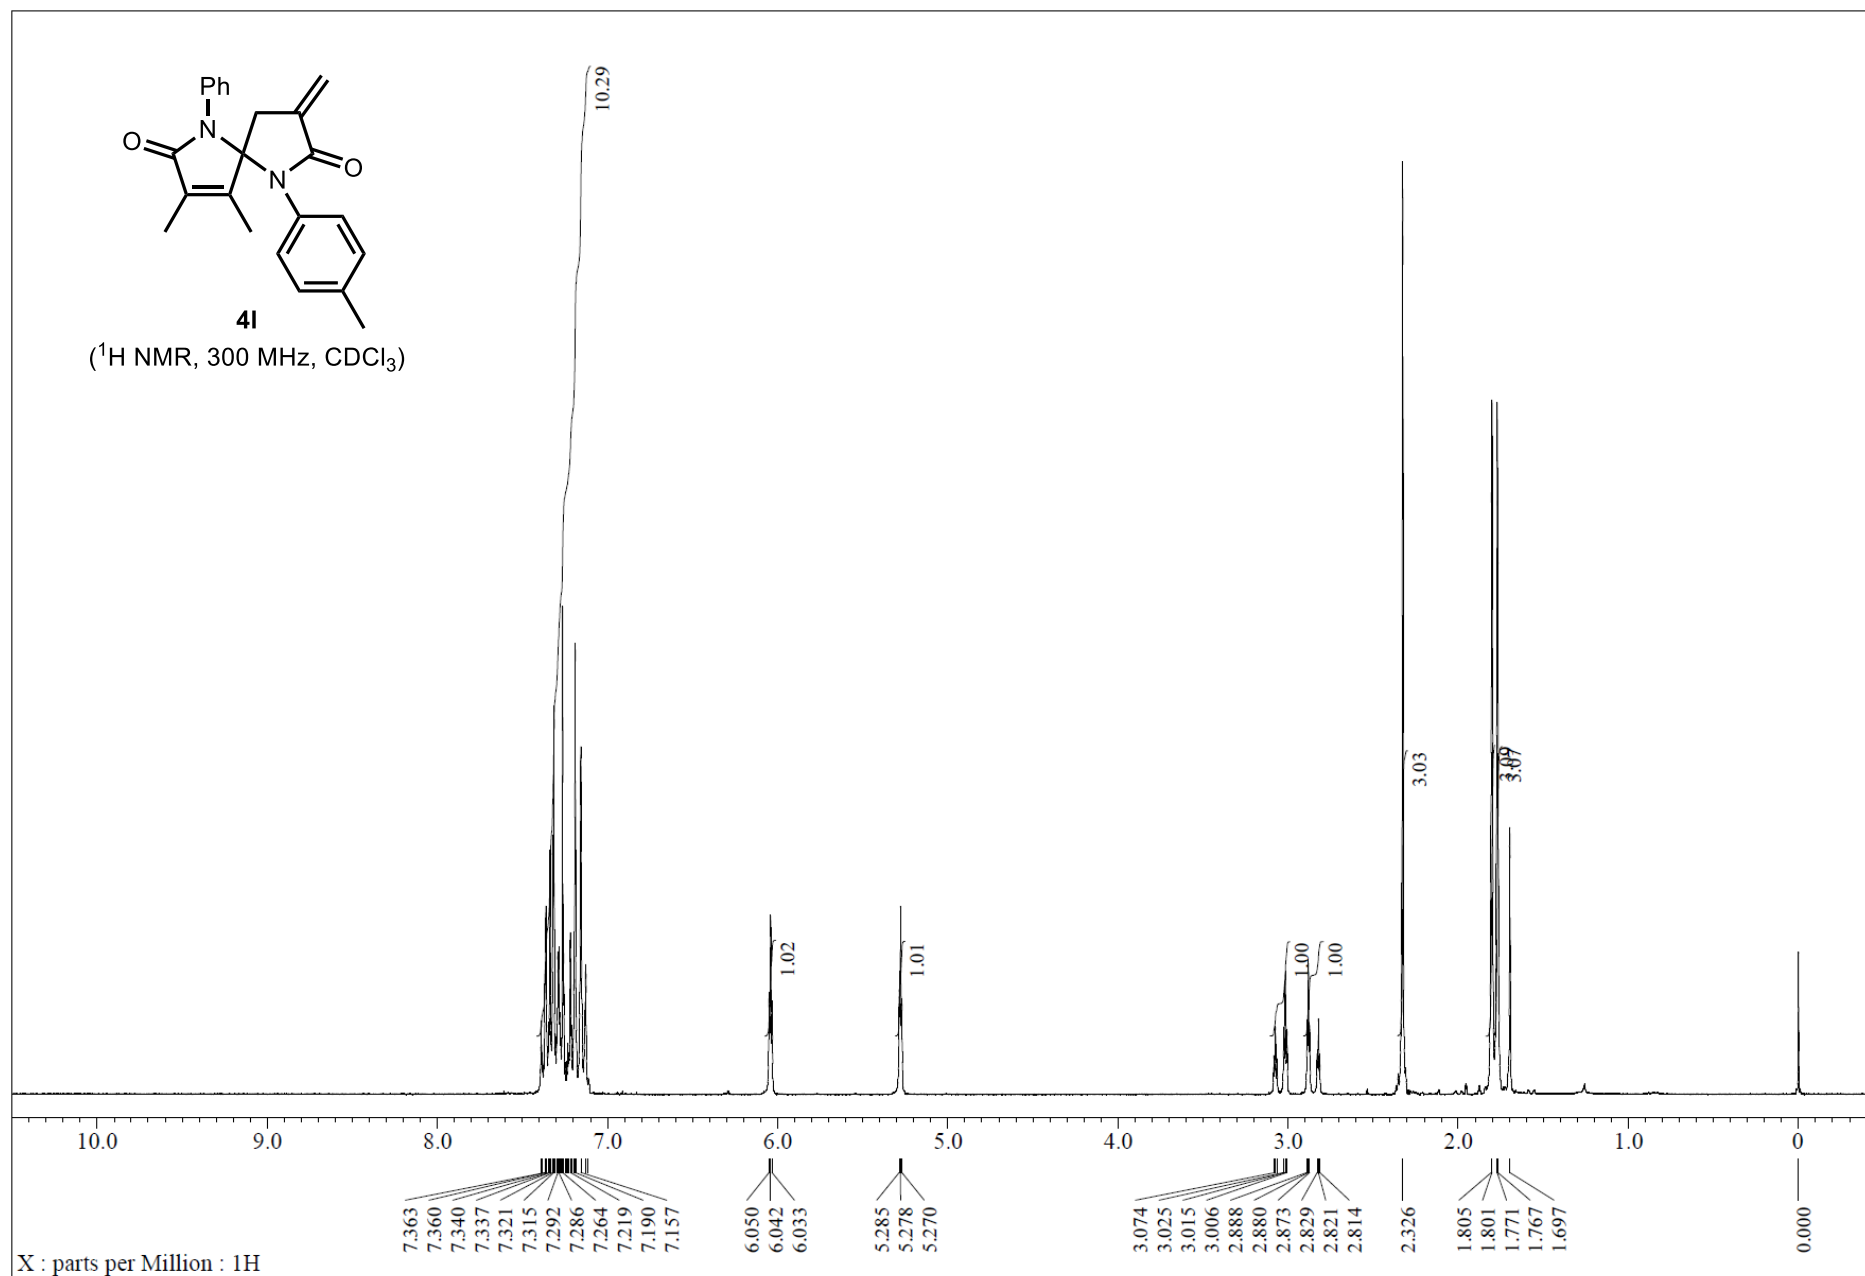

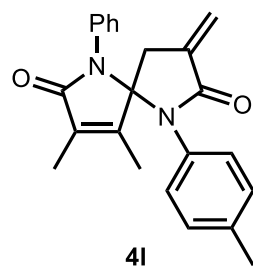

( $^{13}\text{C}$  NMR, 75 MHz,  $\text{CDCl}_3$ )

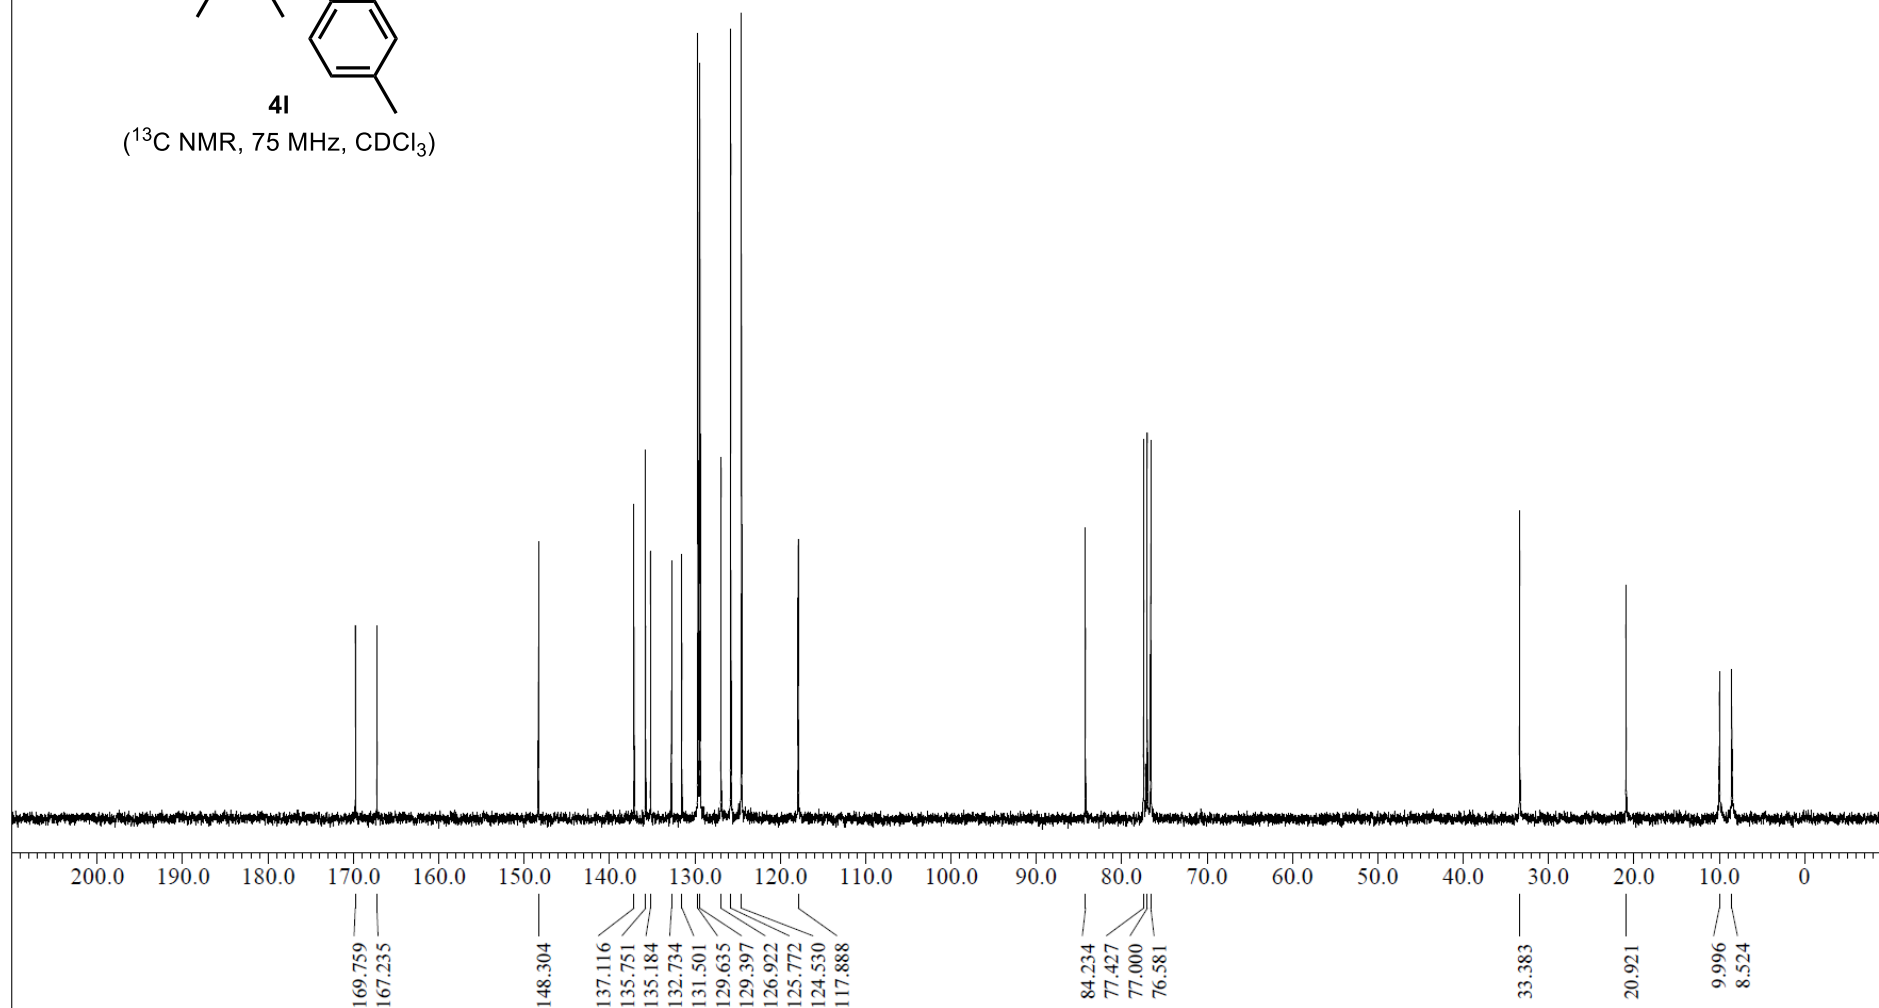

X : parts per Million :  $^{13}\text{C}$

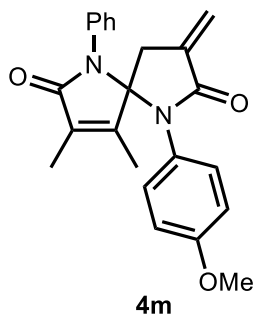

(<sup>1</sup>H NMR, 300 MHz, CDCl<sub>3</sub>)

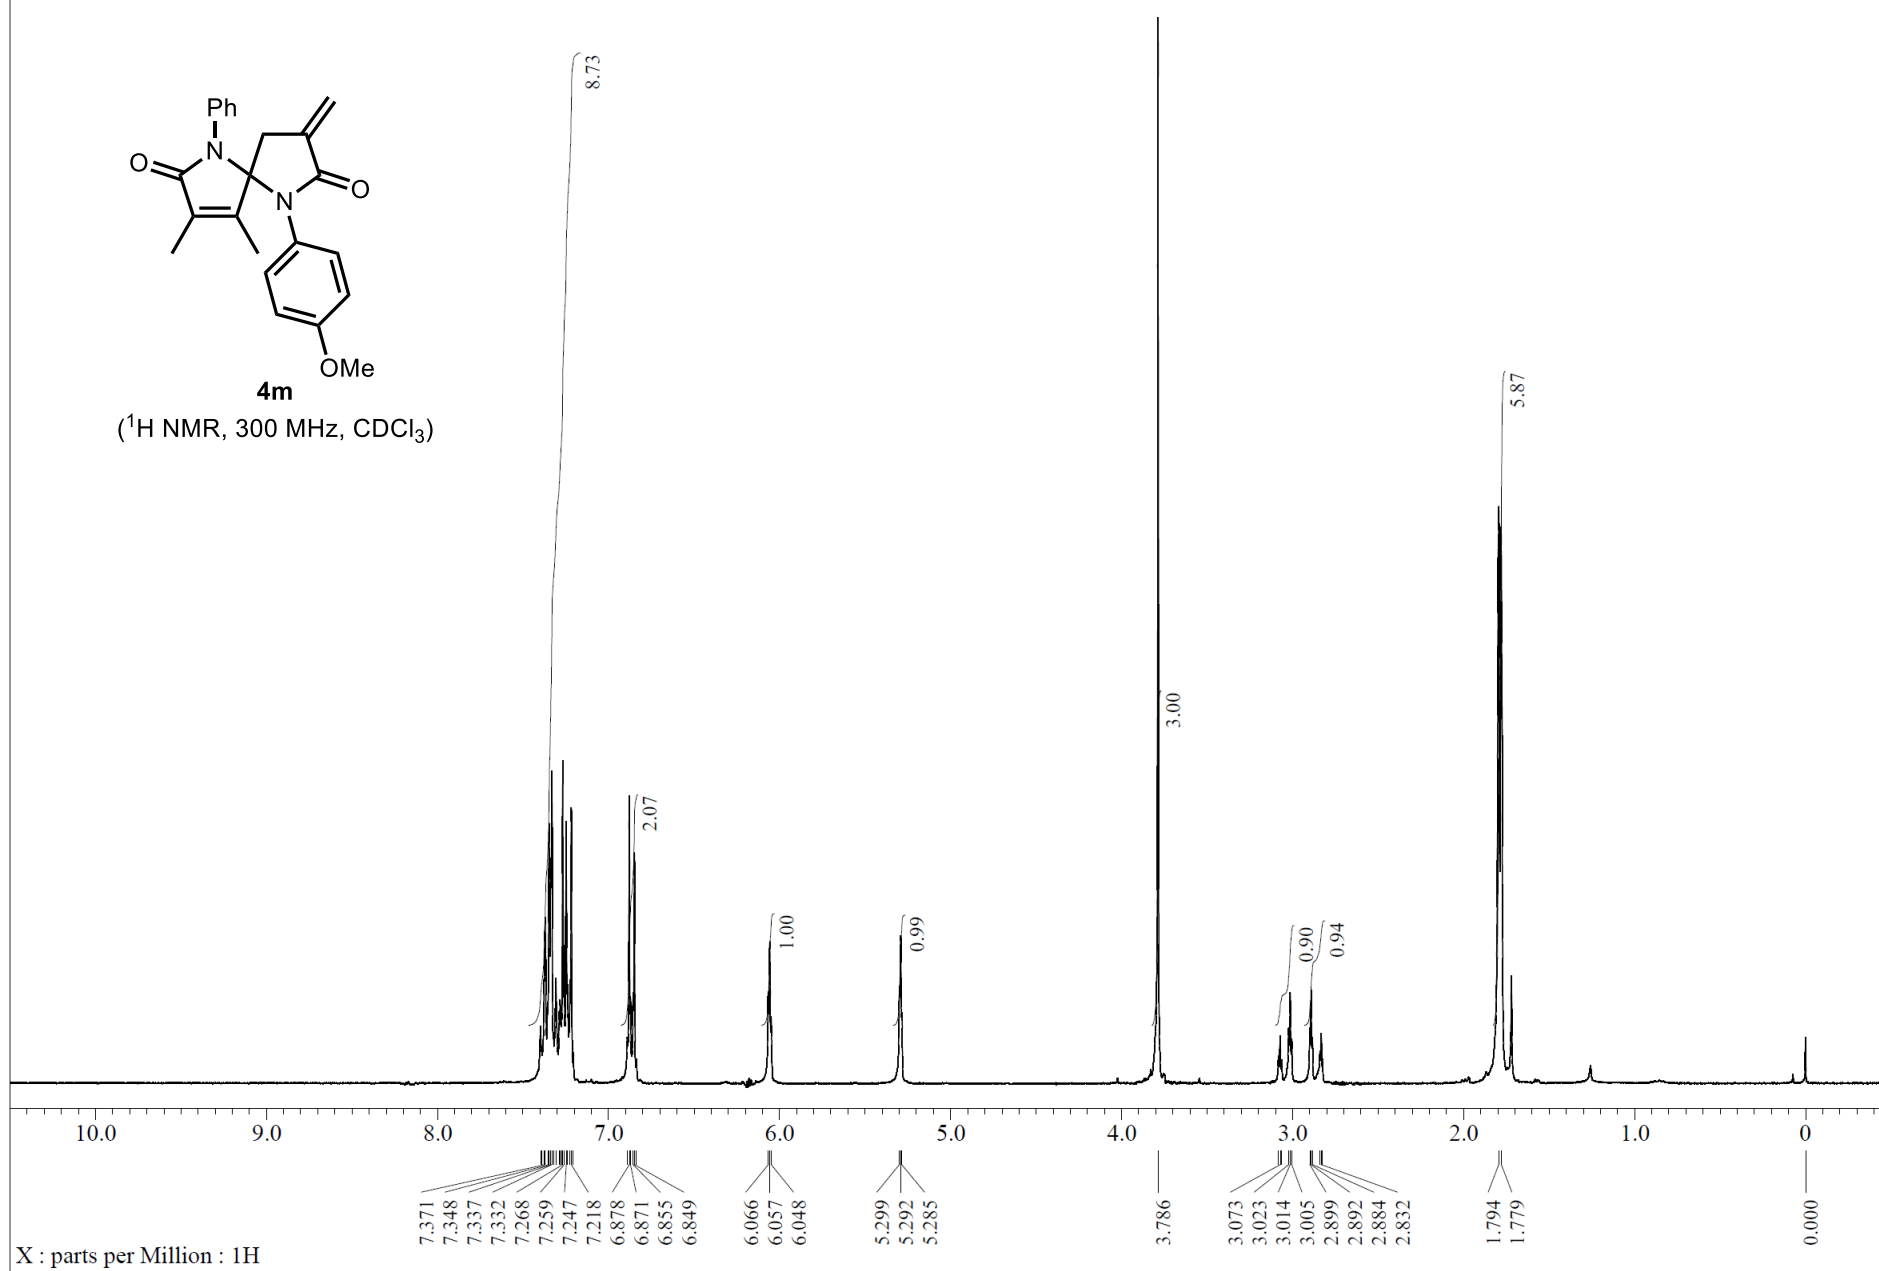

X : parts per Million : 1H

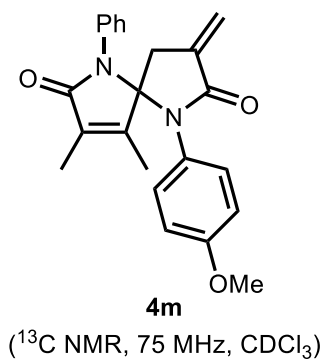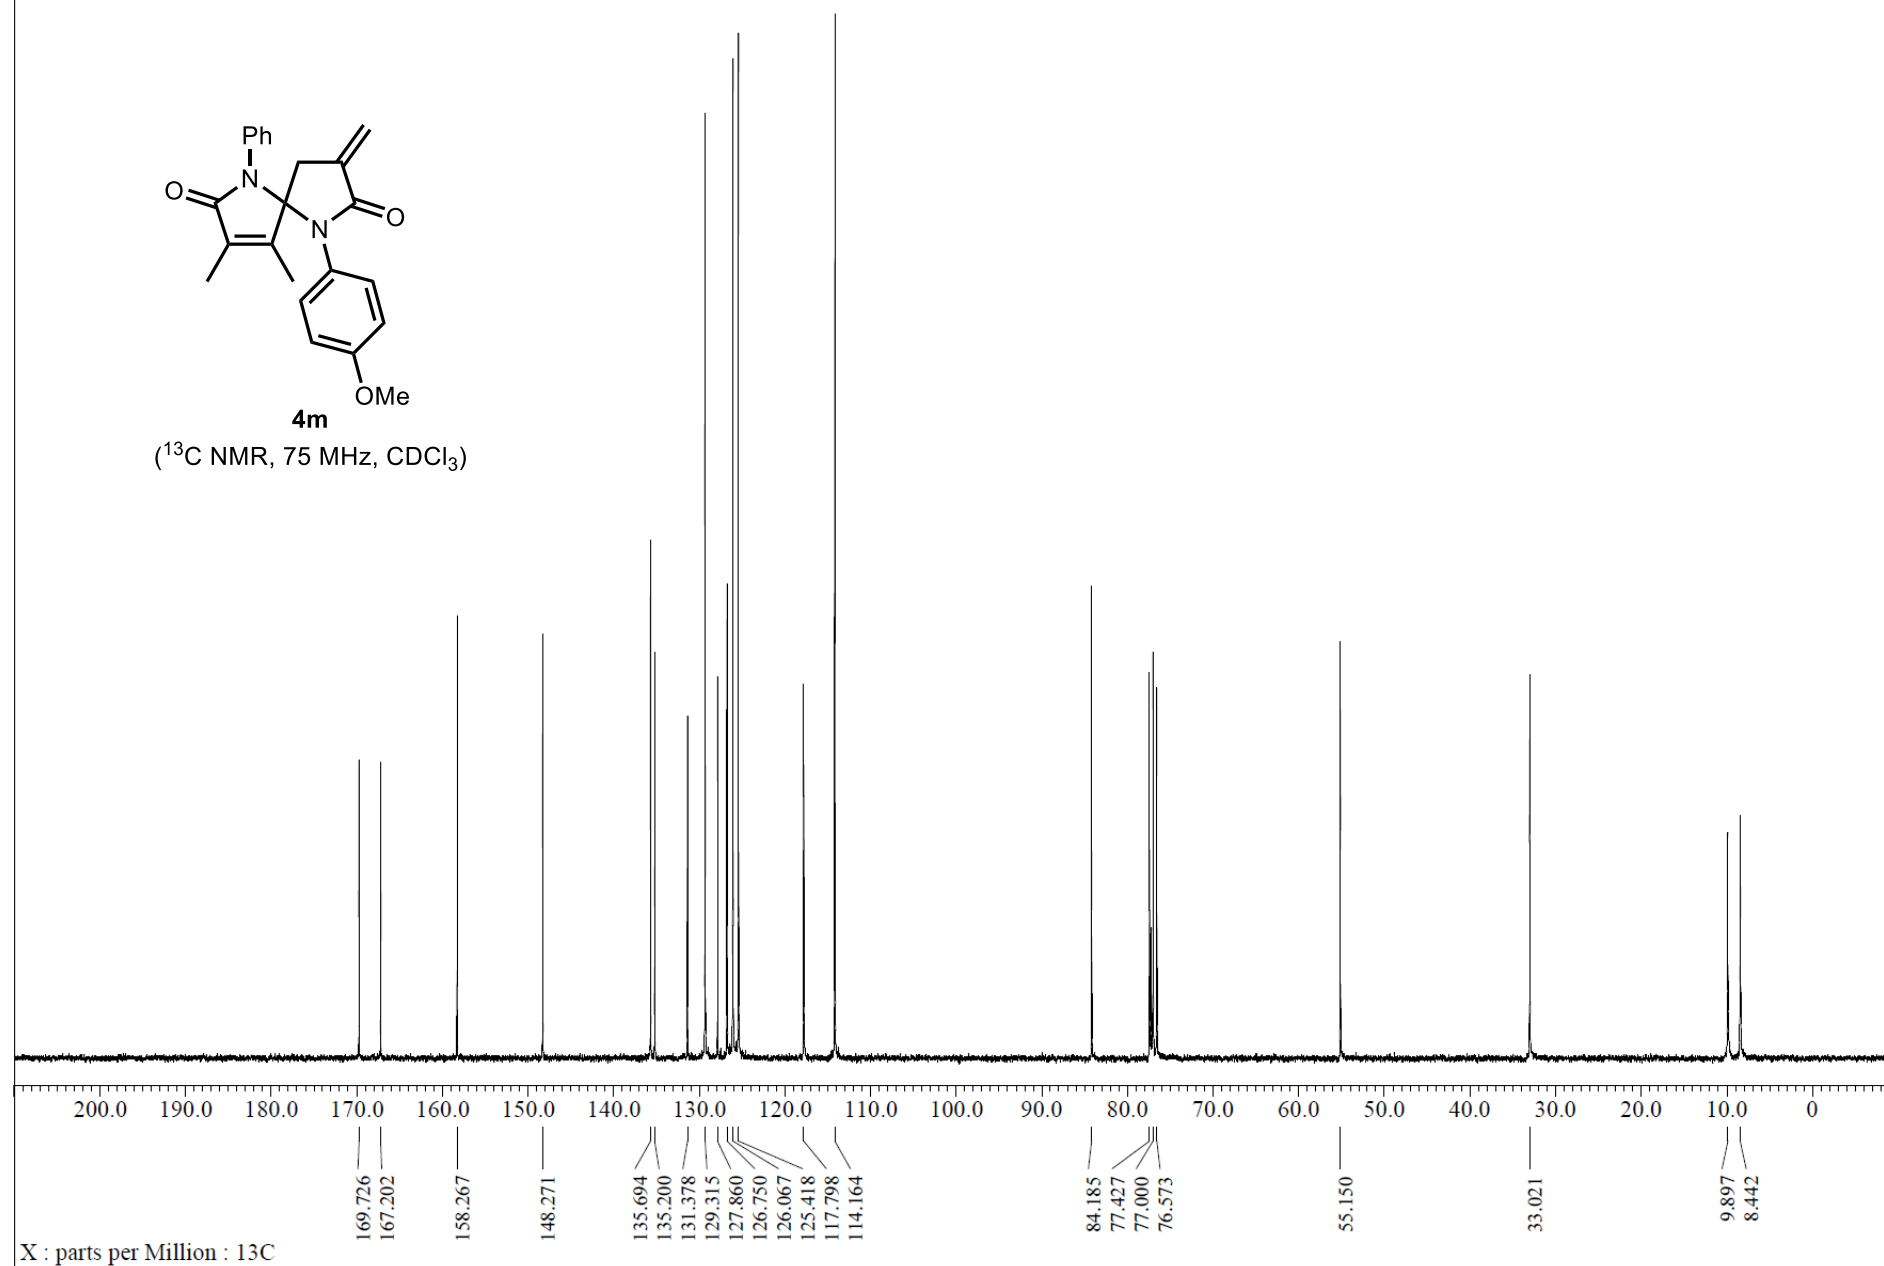



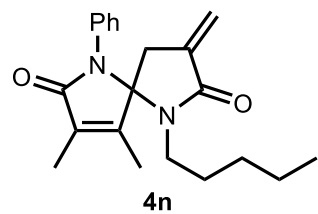

(<sup>1</sup>H NMR, 300 MHz, CDCl<sub>3</sub>)

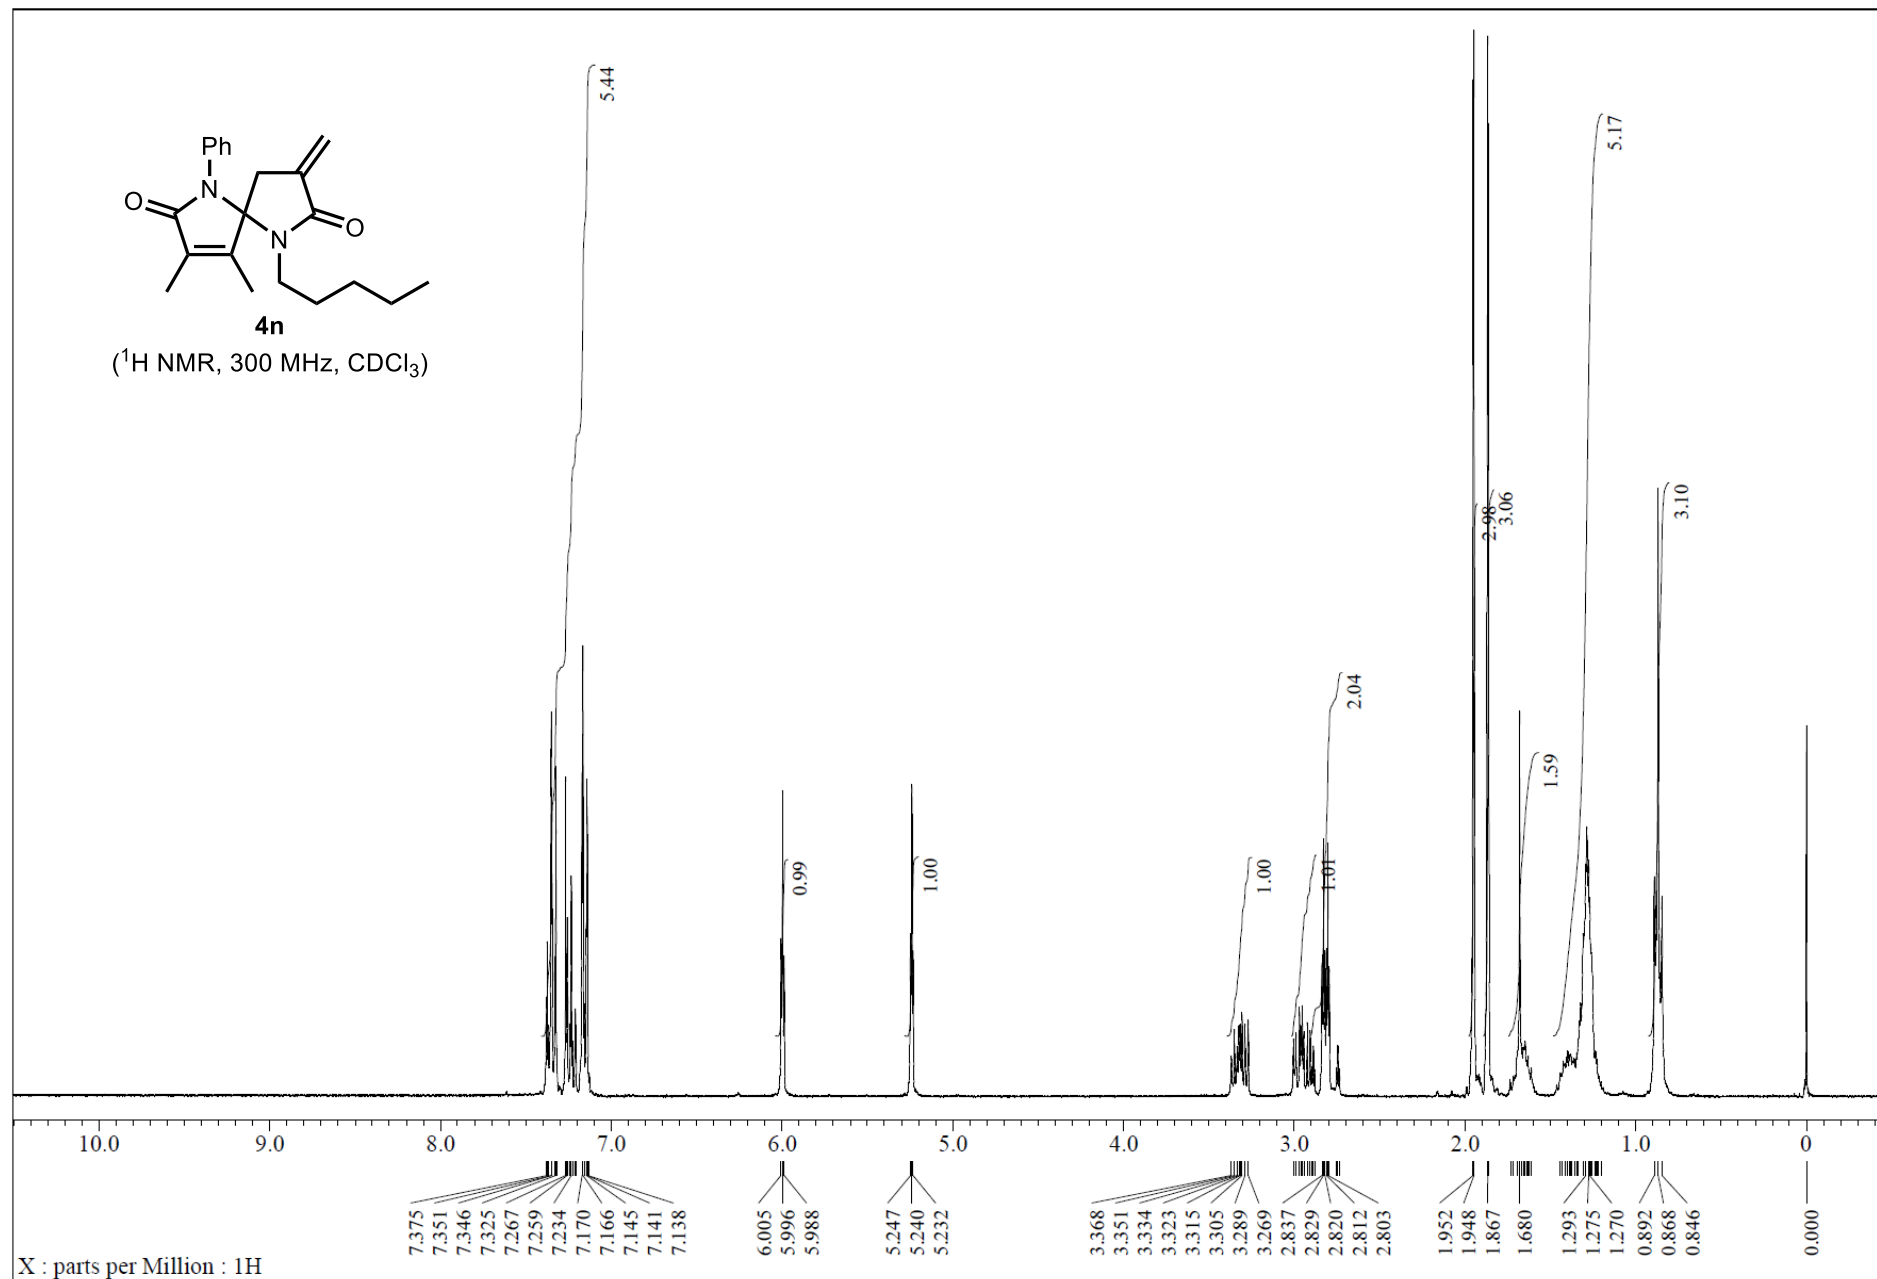

X : parts per Million : 1H

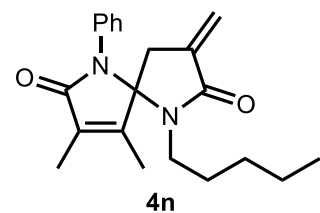

( $^{13}\text{C}$  NMR, 75 MHz,  $\text{CDCl}_3$ )

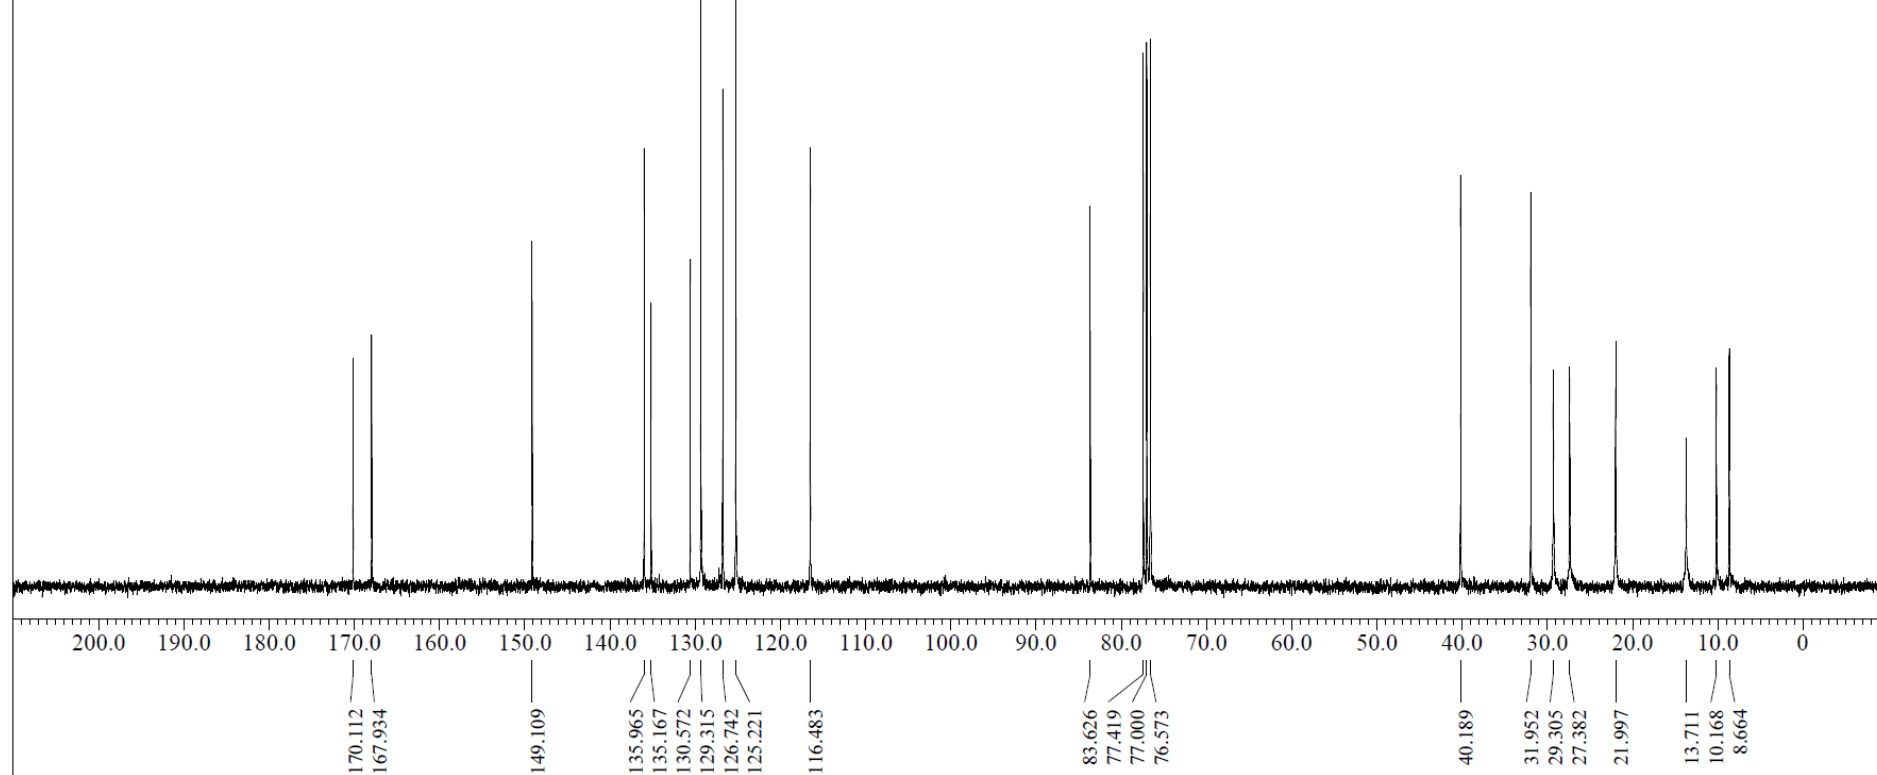

X : parts per Million :  $^{13}\text{C}$

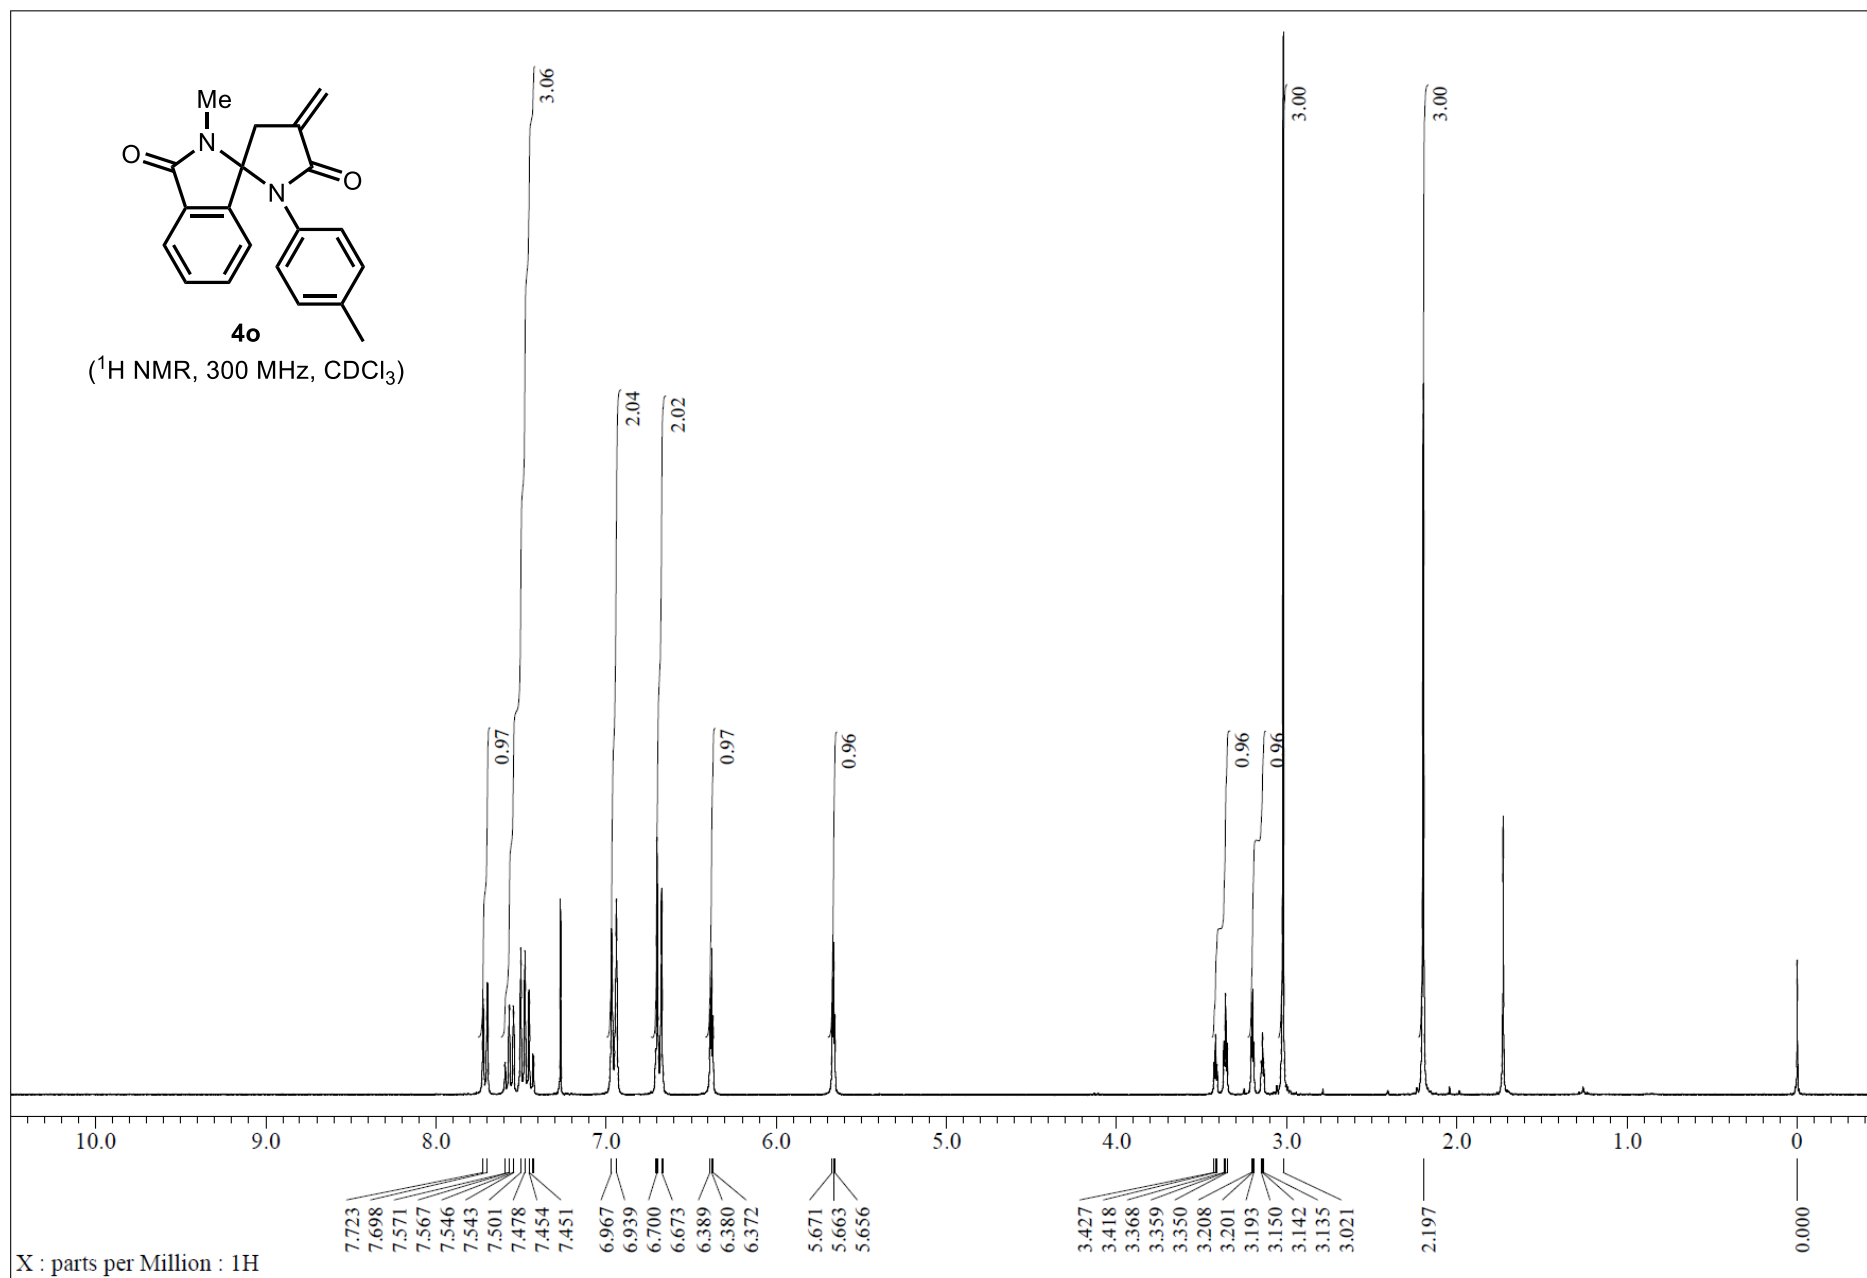

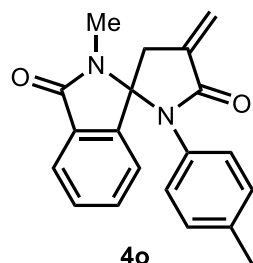

( $^{13}\text{C}$  NMR, 75 MHz,  $\text{CDCl}_3$ )

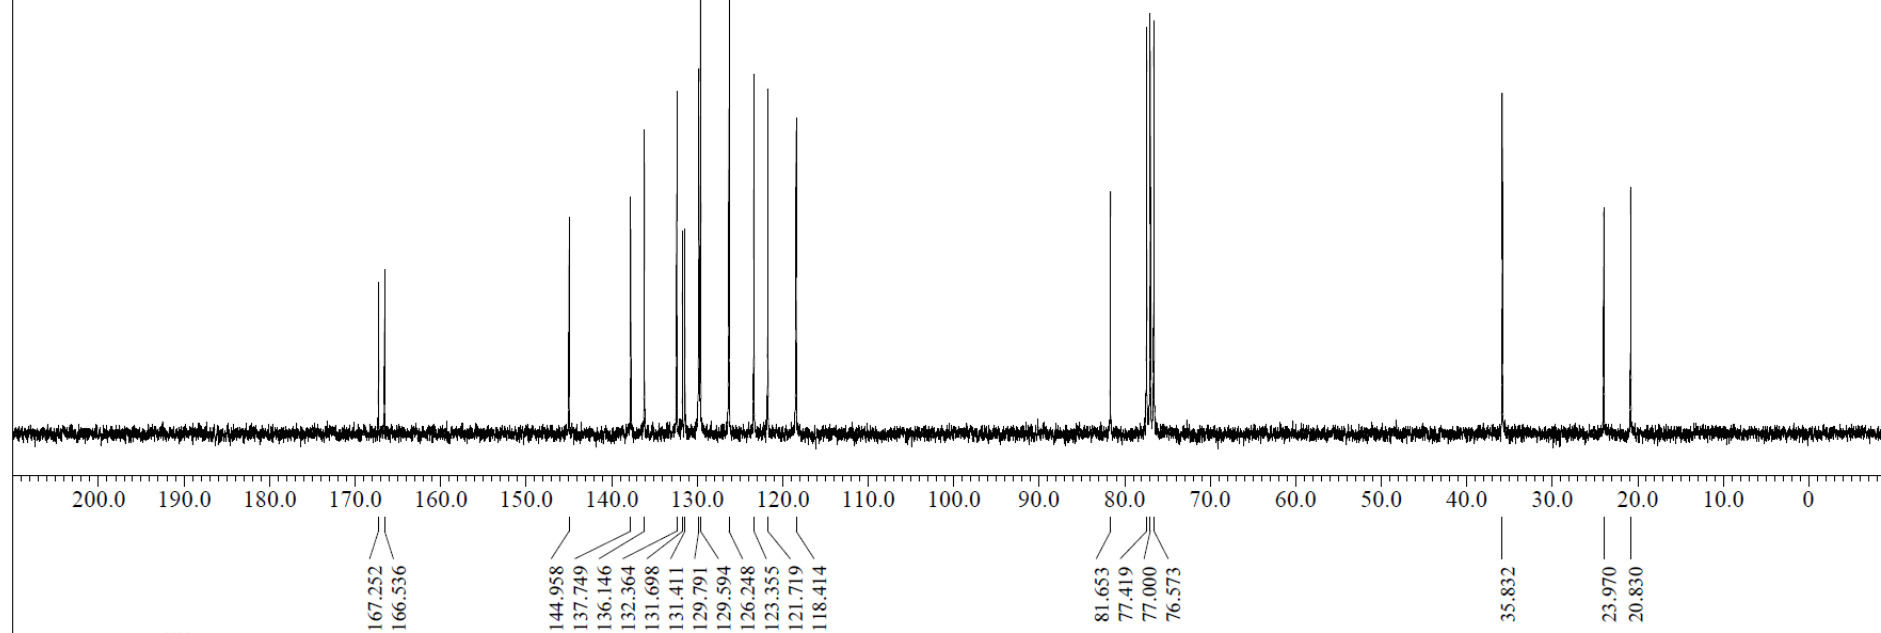

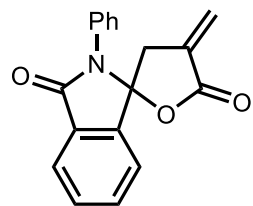

**5a**

(<sup>1</sup>H NMR, 300 MHz, CDCl<sub>3</sub>)

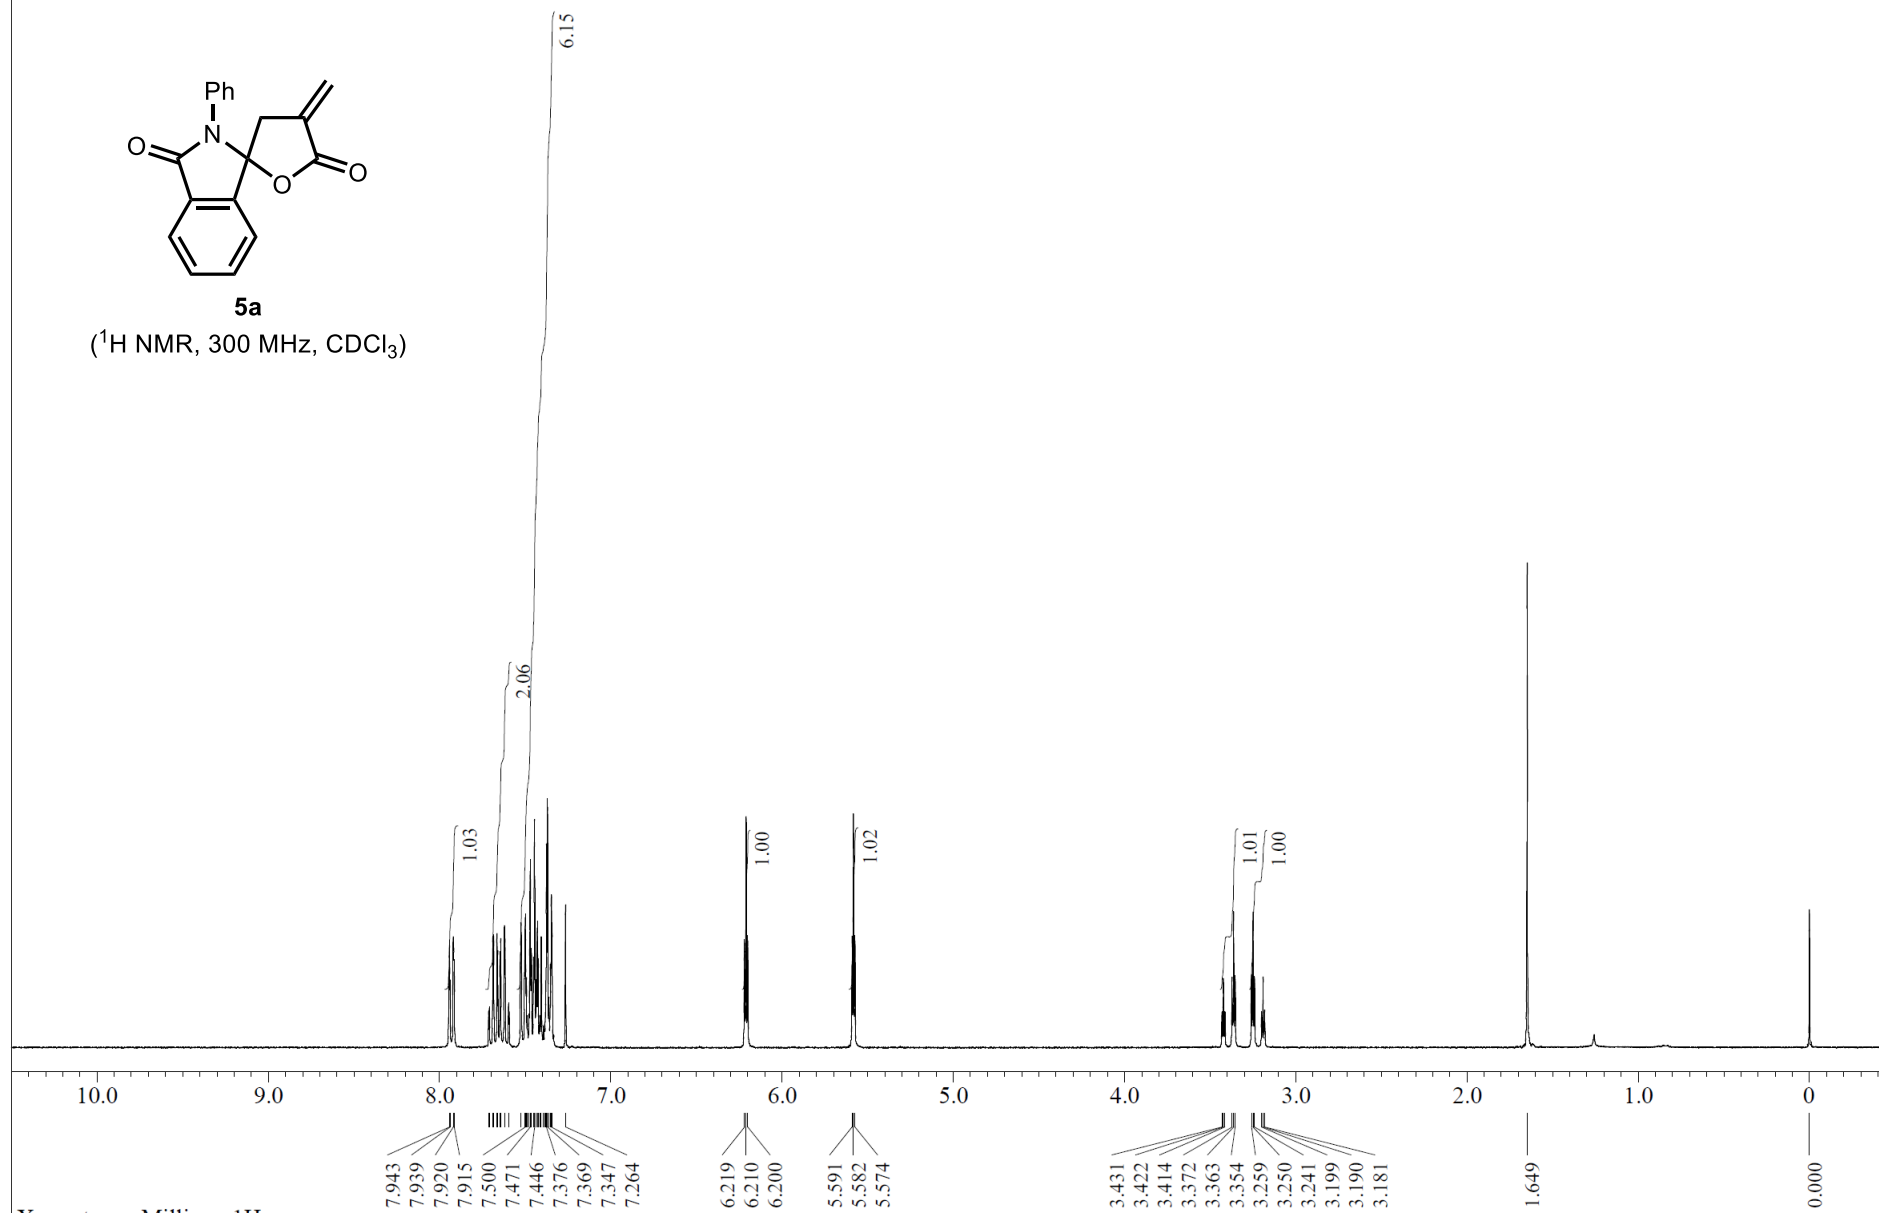

X : parts per Million : 1H

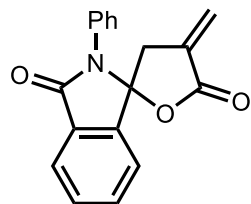

**5a**

( $^{13}\text{C}$  NMR, 75 MHz,  $\text{CDCl}_3$ )

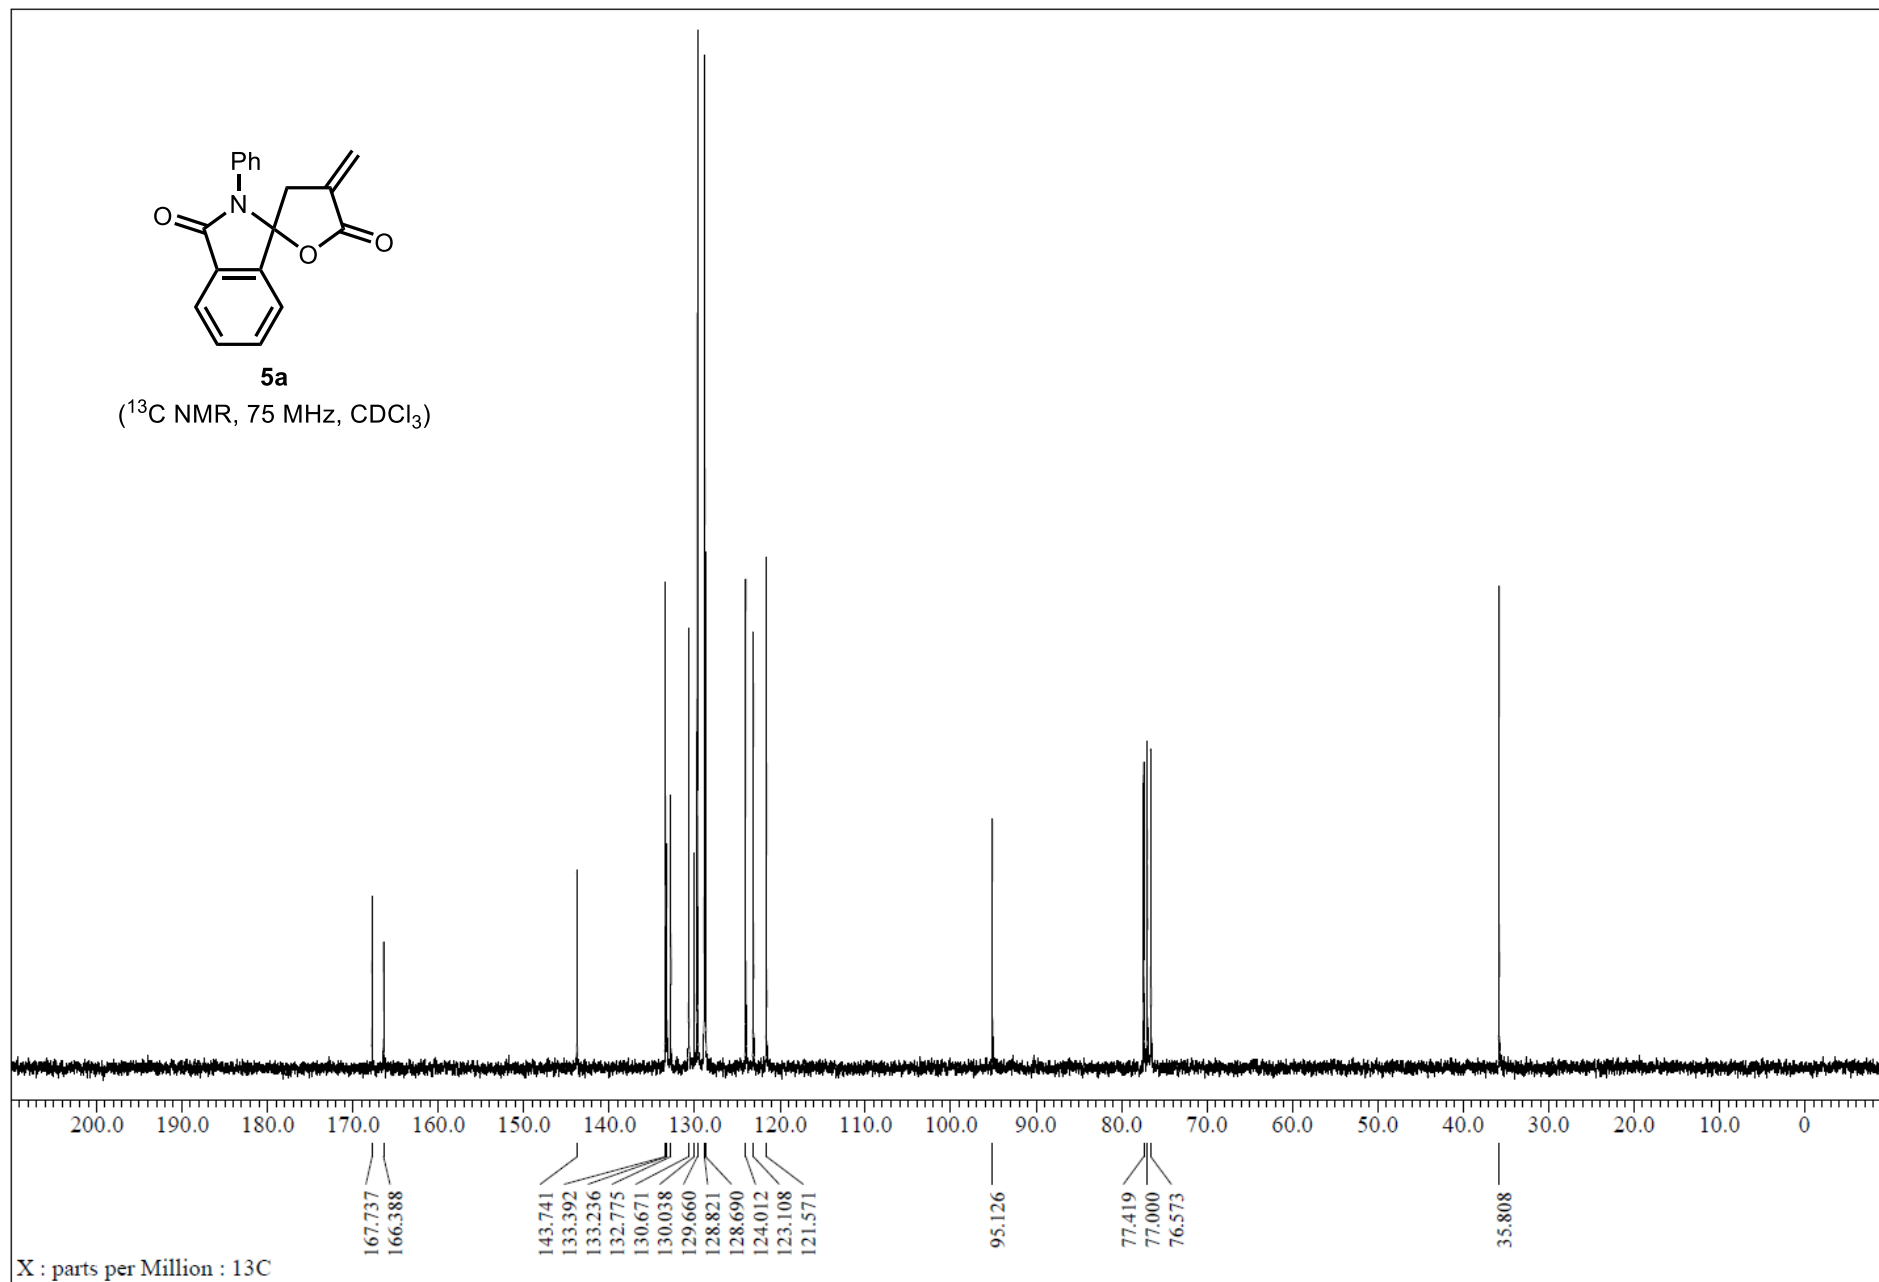

X : parts per Million :  $^{13}\text{C}$

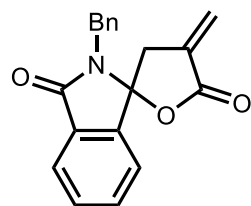

**5b**

( $^1\text{H}$  NMR, 300 MHz,  $\text{CDCl}_3$ )

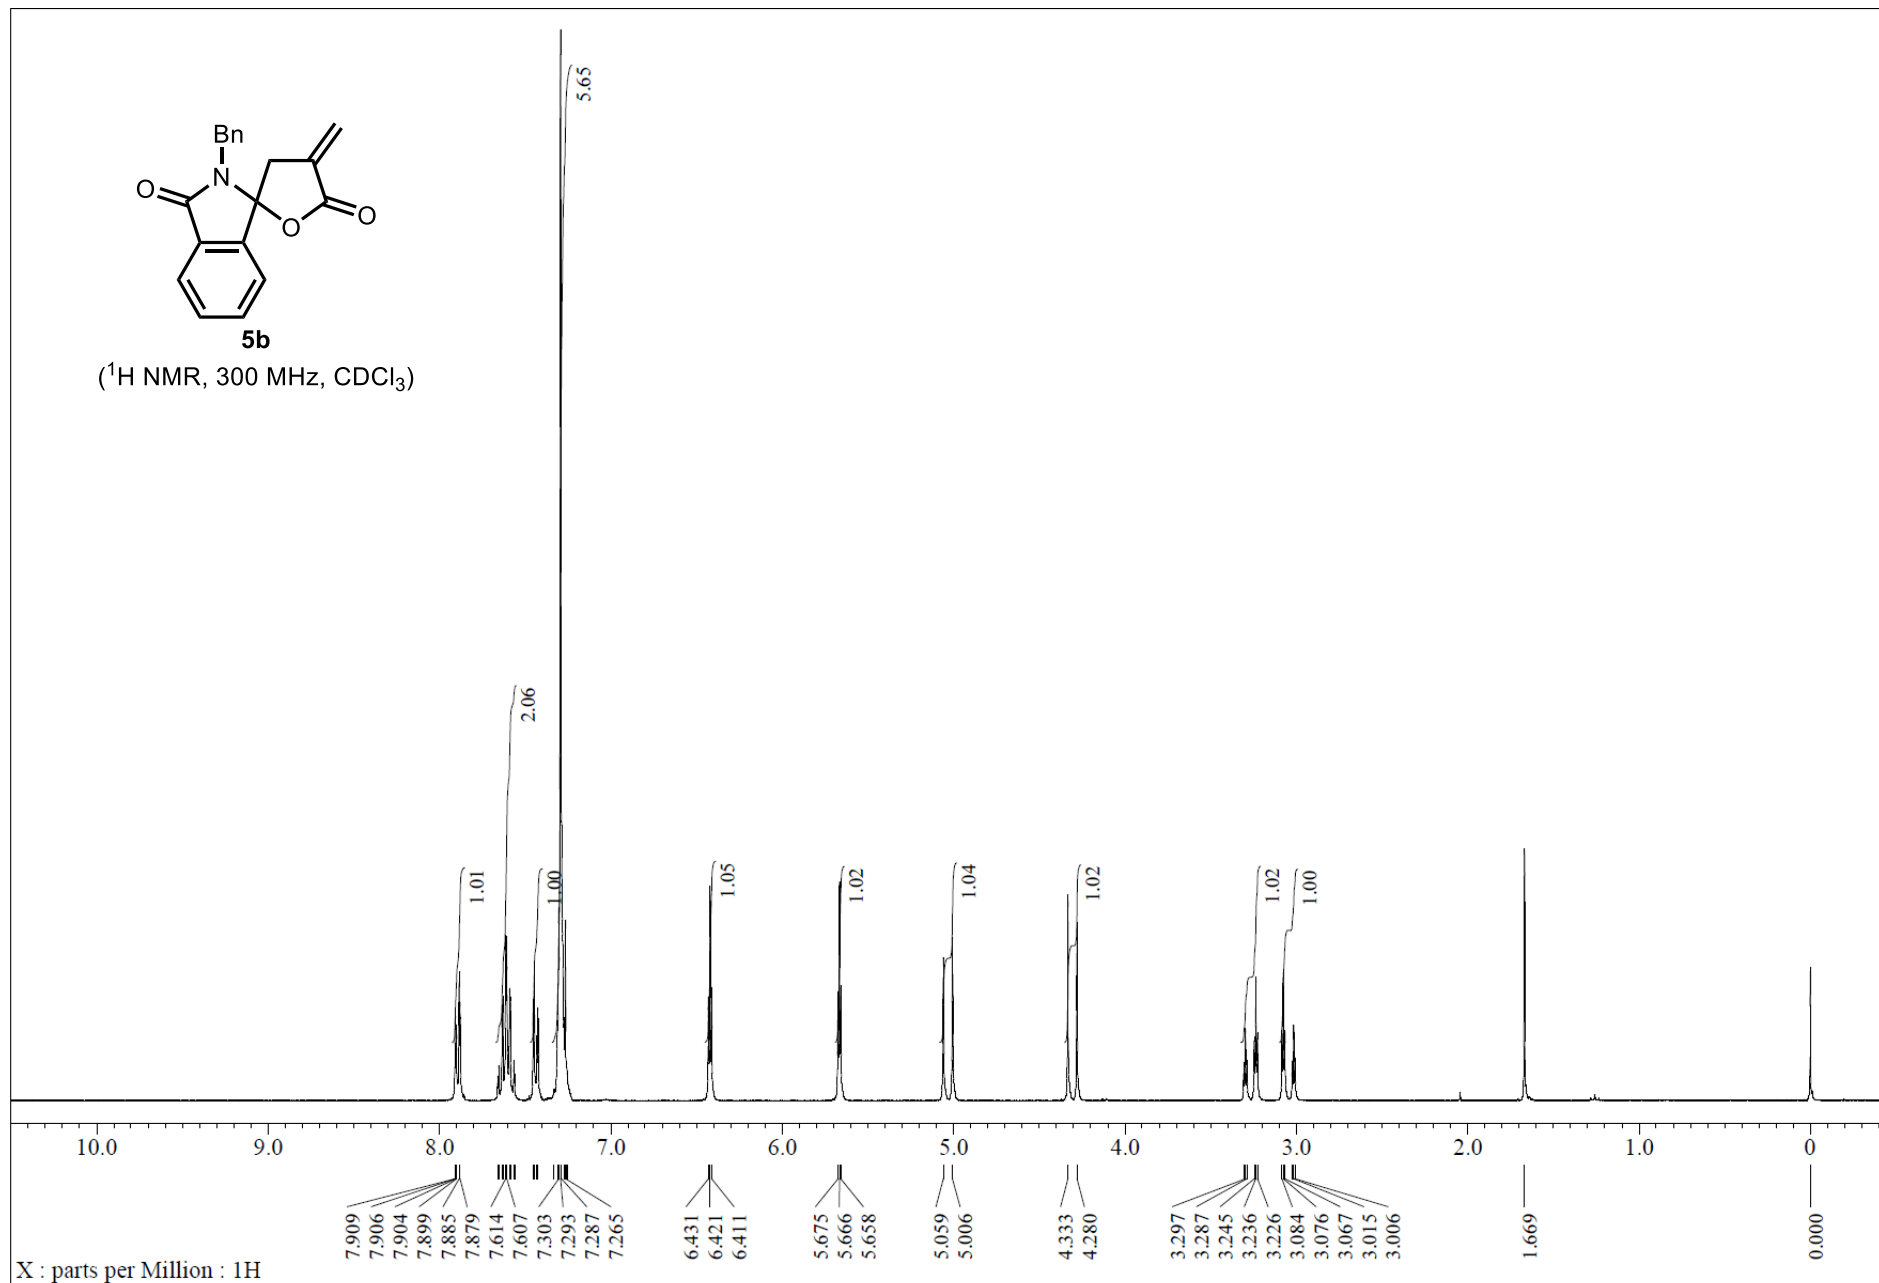

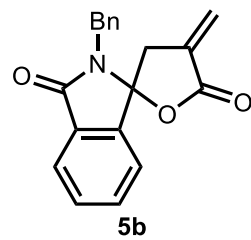

( $^{13}\text{C}$  NMR, 75 MHz,  $\text{CDCl}_3$ )

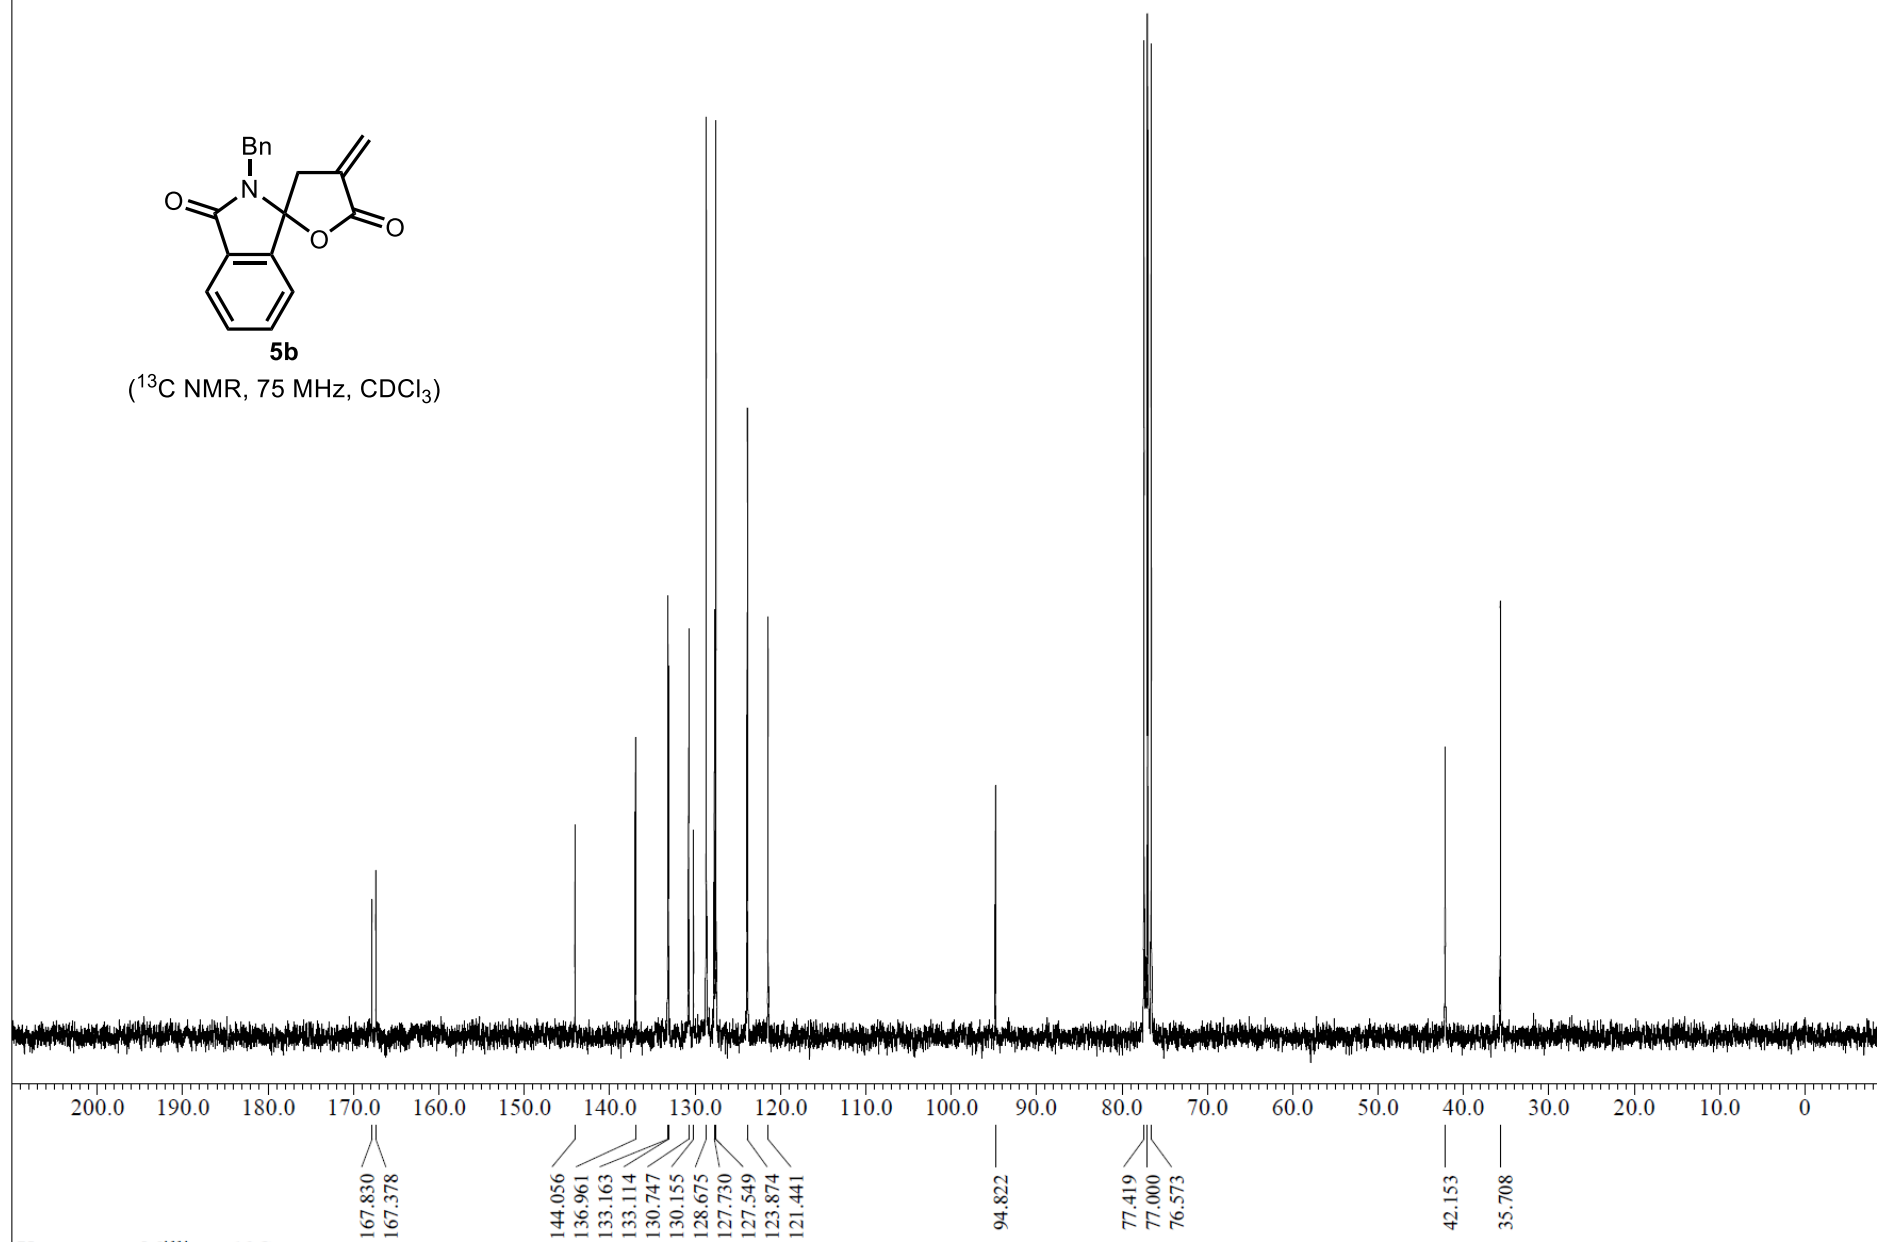

X : parts per Million :  $^{13}\text{C}$



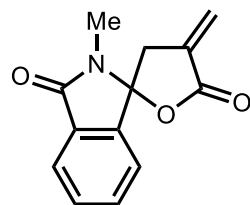

**5c**

( $^1\text{H}$  NMR, 300 MHz,  $\text{CDCl}_3$ )

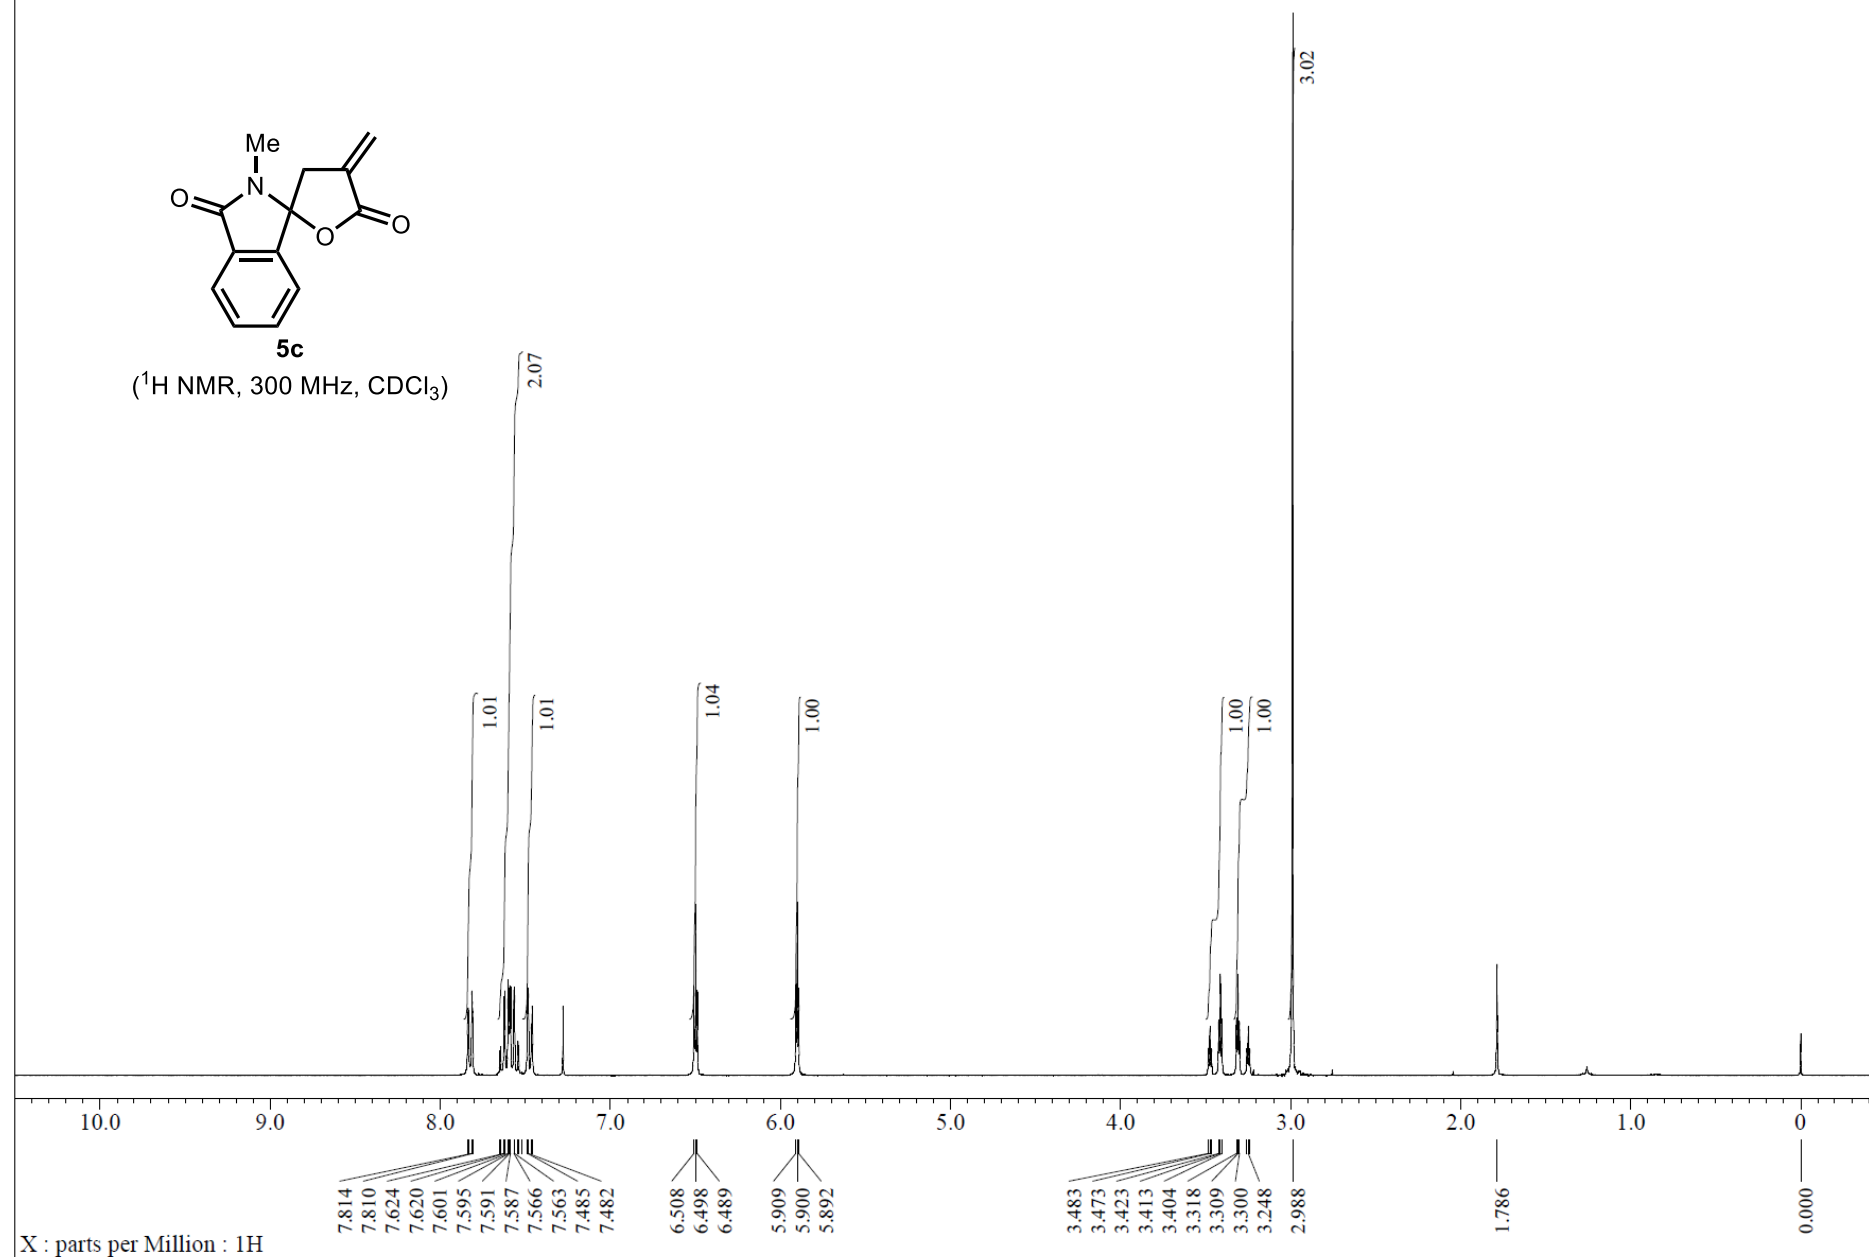

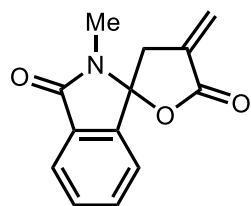

**5c**

( $^{13}\text{C}$  NMR, 75 MHz,  $\text{CDCl}_3$ )

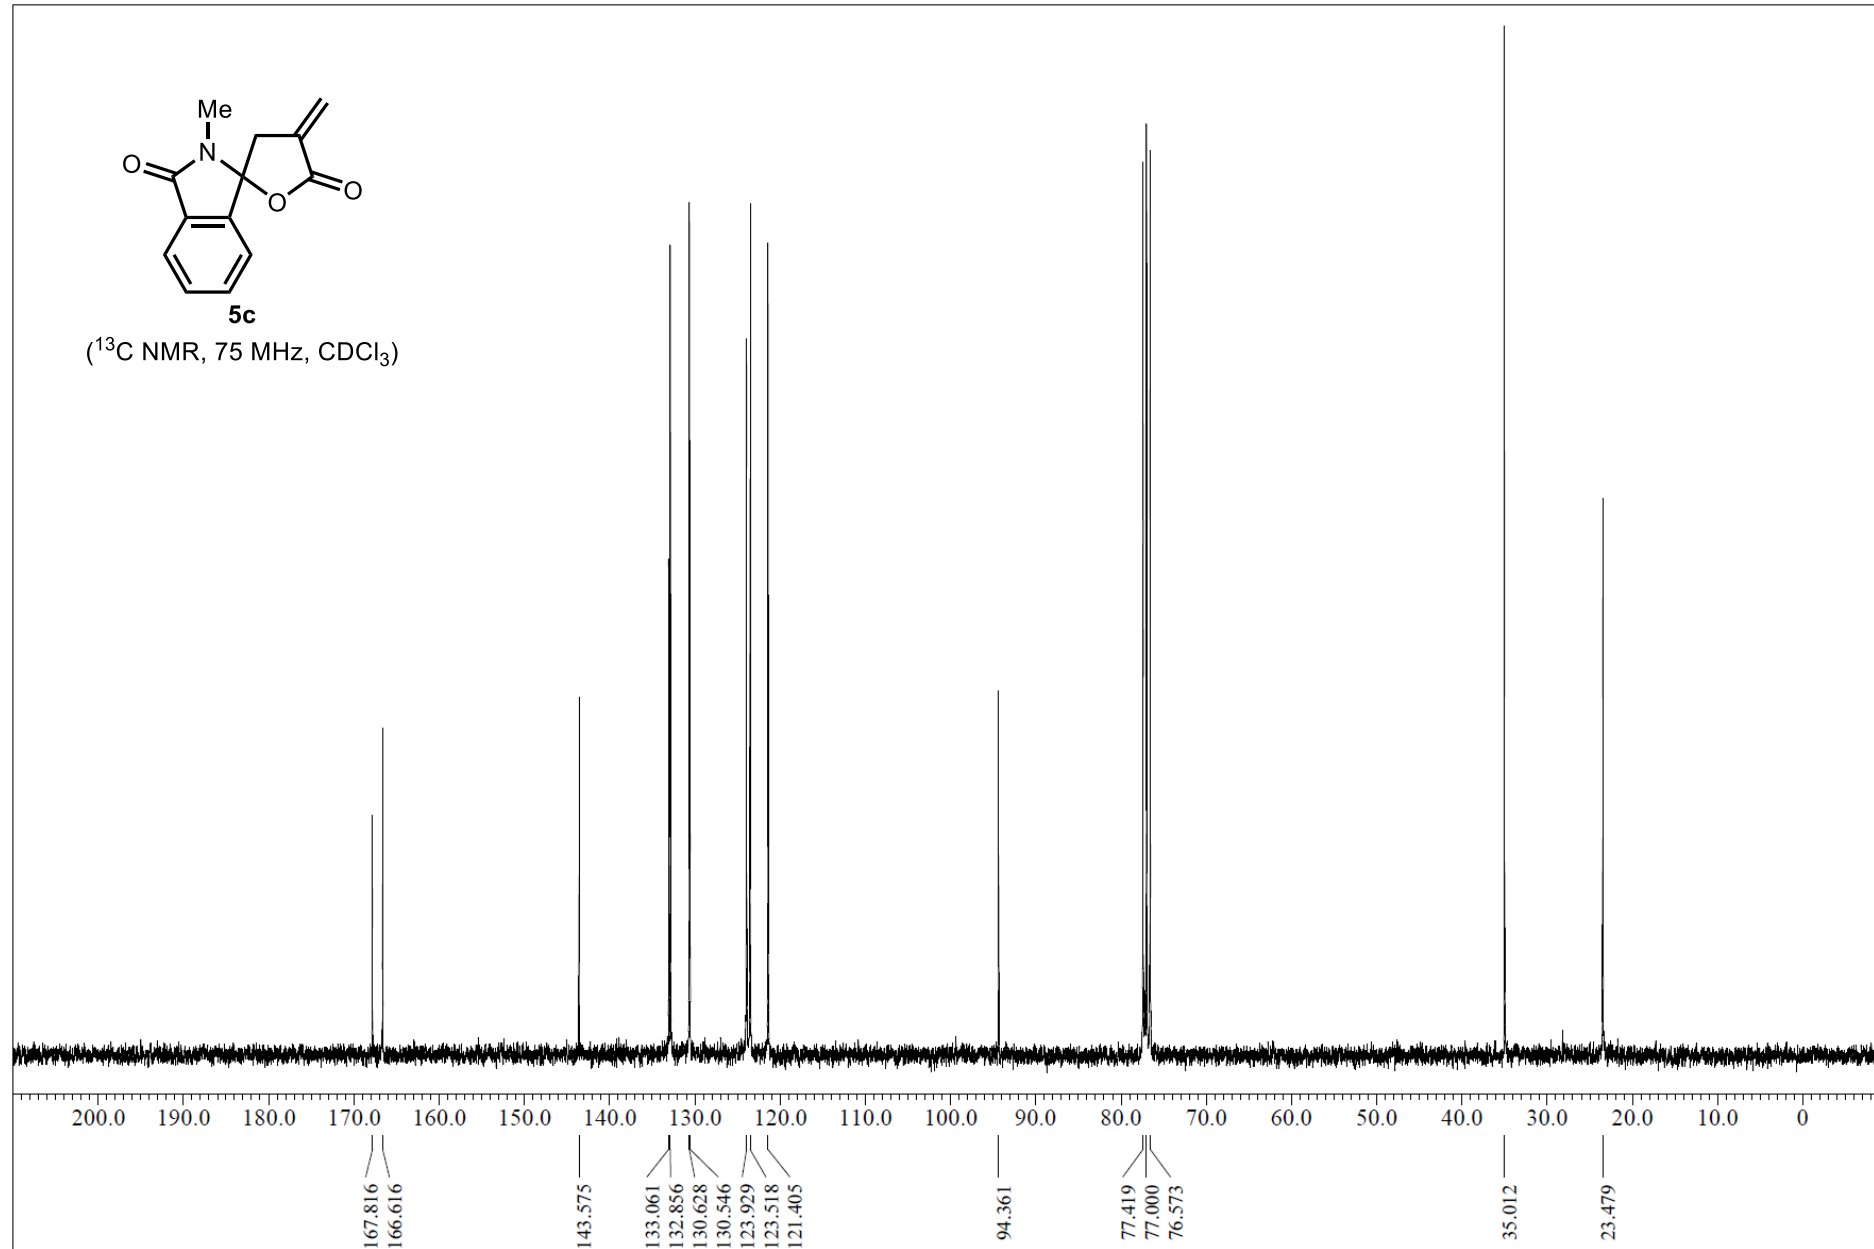

X : parts per Million :  $^{13}\text{C}$

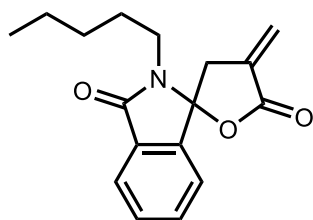

**5d**

( $^1\text{H}$  NMR, 300 MHz,  $\text{CDCl}_3$ )

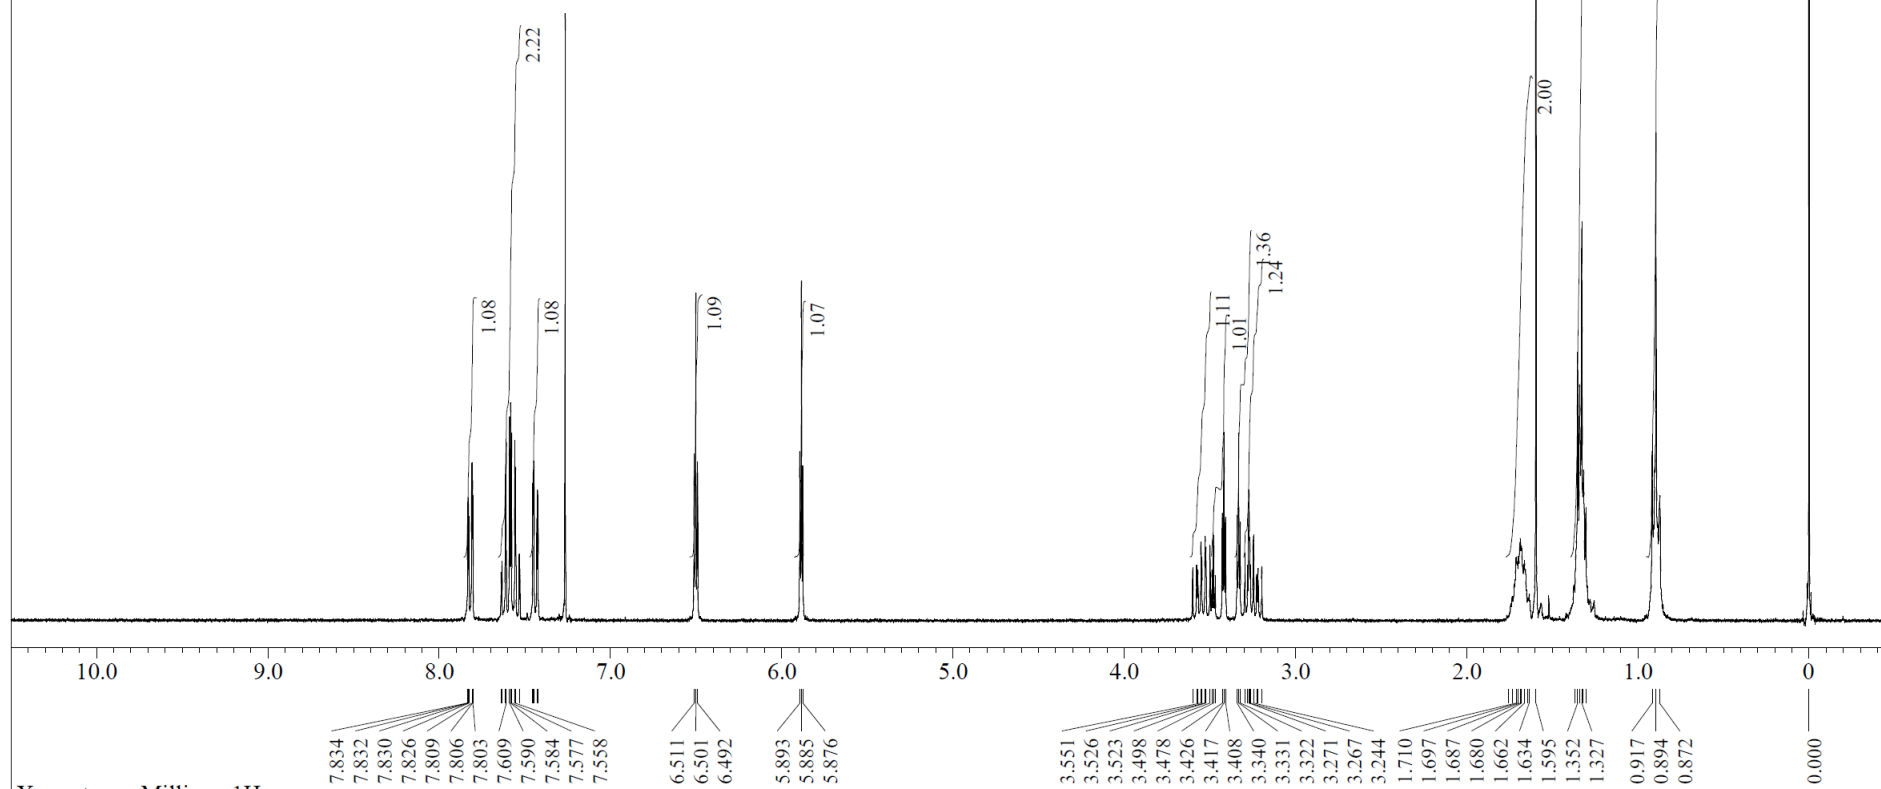

X : parts per Million :  $^1\text{H}$

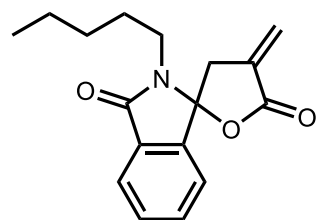

**5d**

( $^{13}\text{C}$  NMR, 75 MHz,  $\text{CDCl}_3$ )

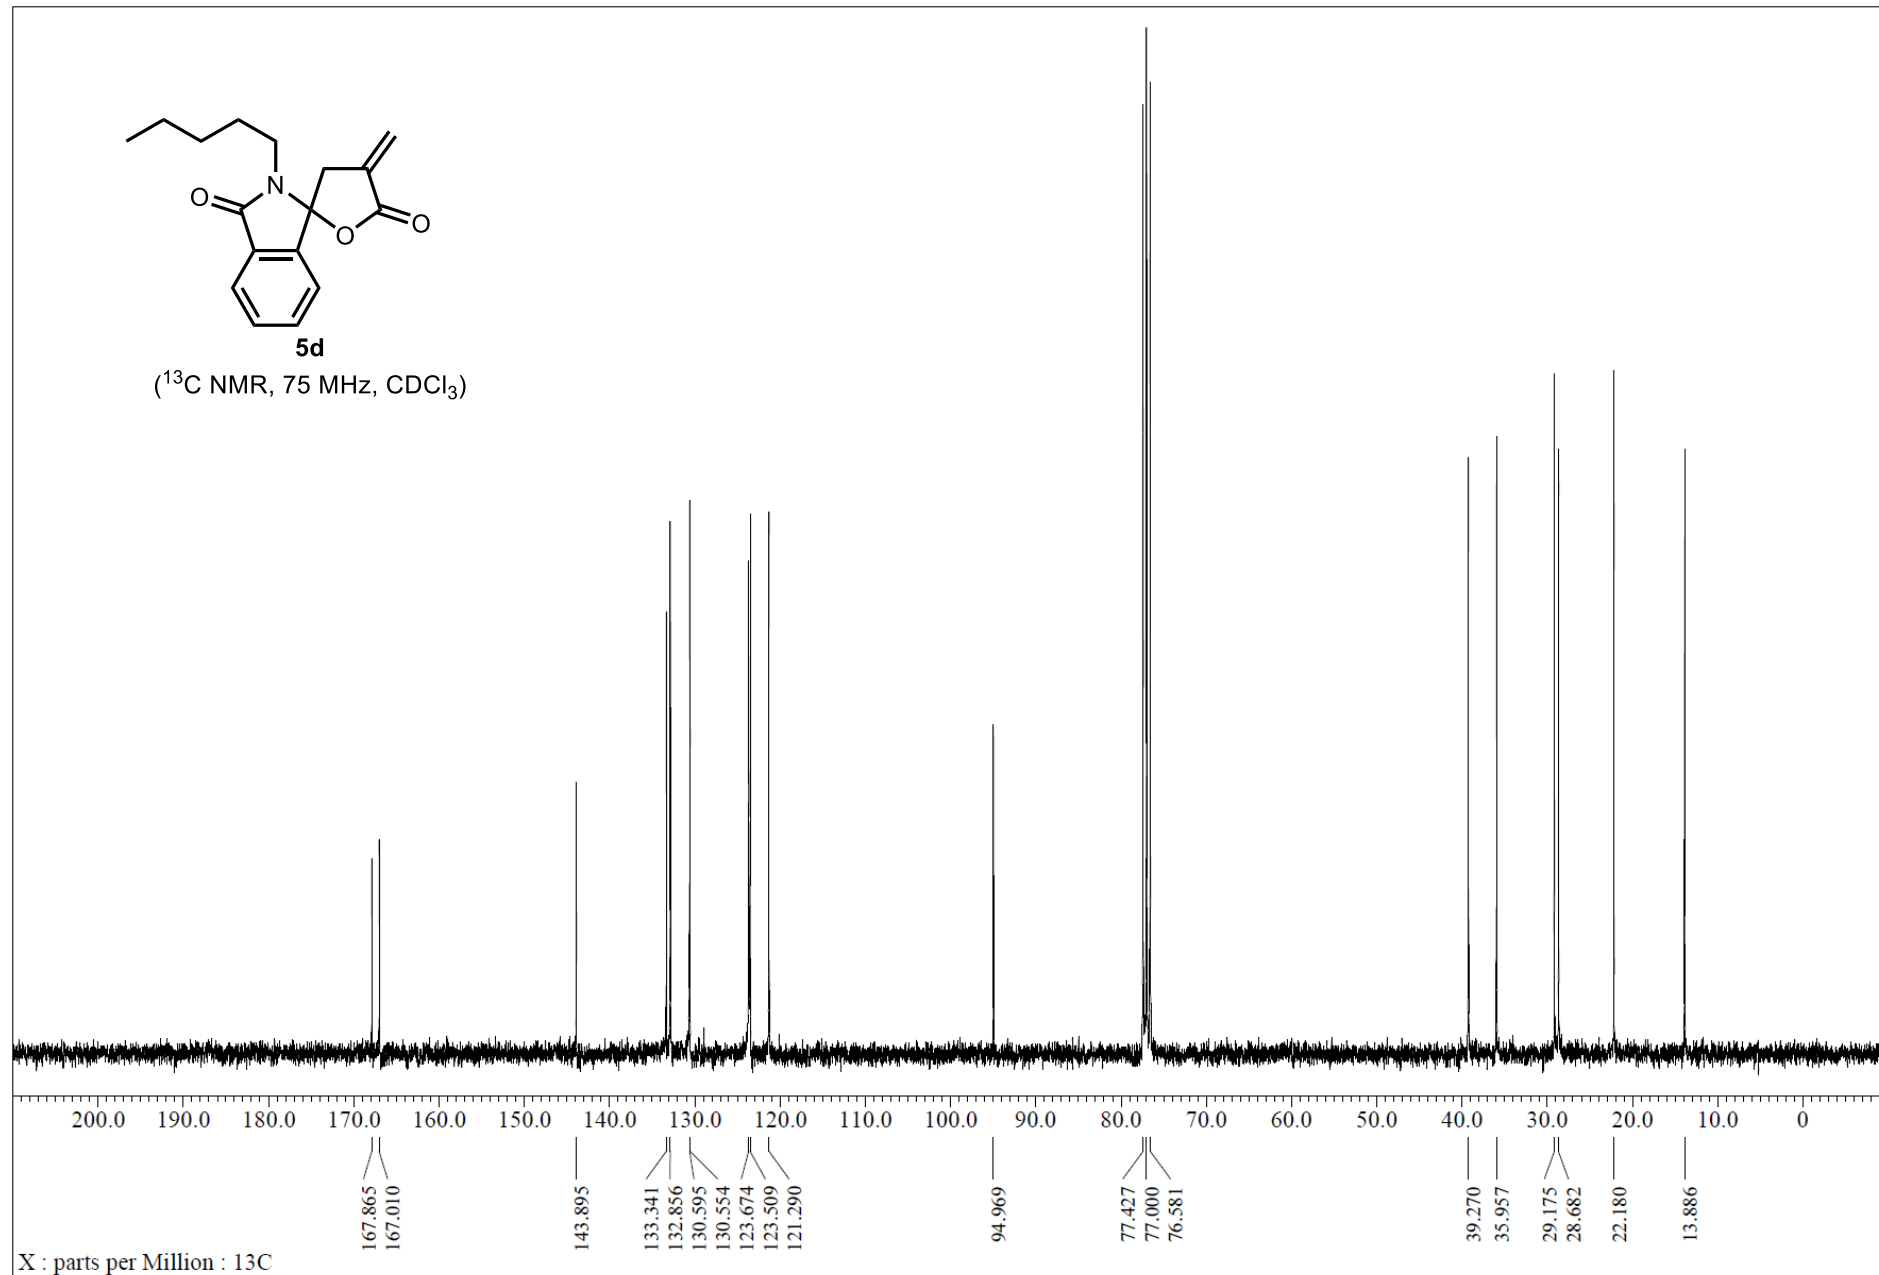

X : parts per Million :  $^{13}\text{C}$

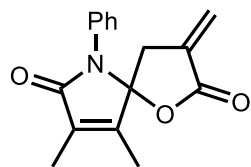

**5e**

(<sup>1</sup>H NMR, 300 MHz, CDCl<sub>3</sub>)

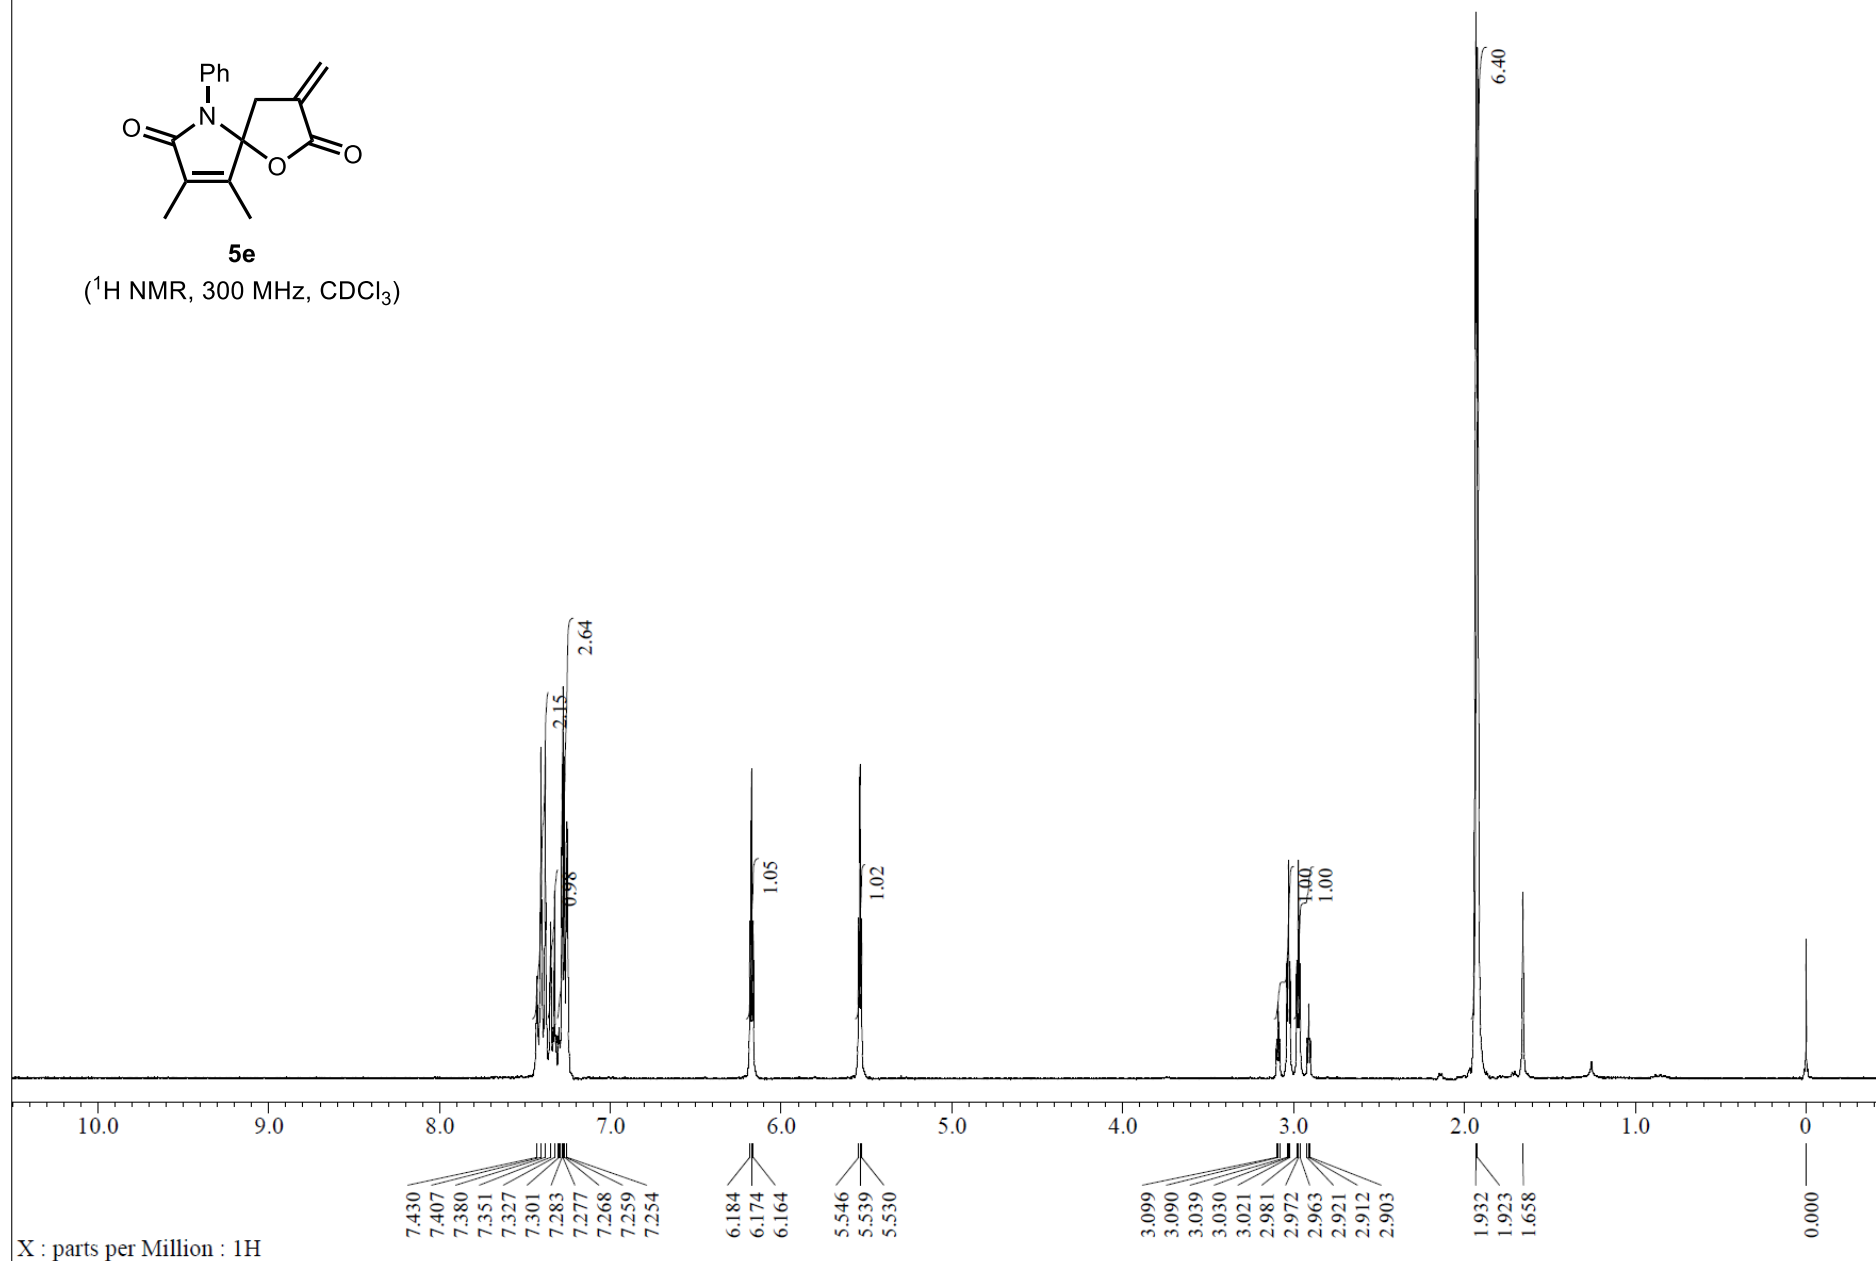

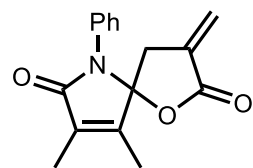

**5e**

( $^{13}\text{C}$  NMR, 75 MHz,  $\text{CDCl}_3$ )

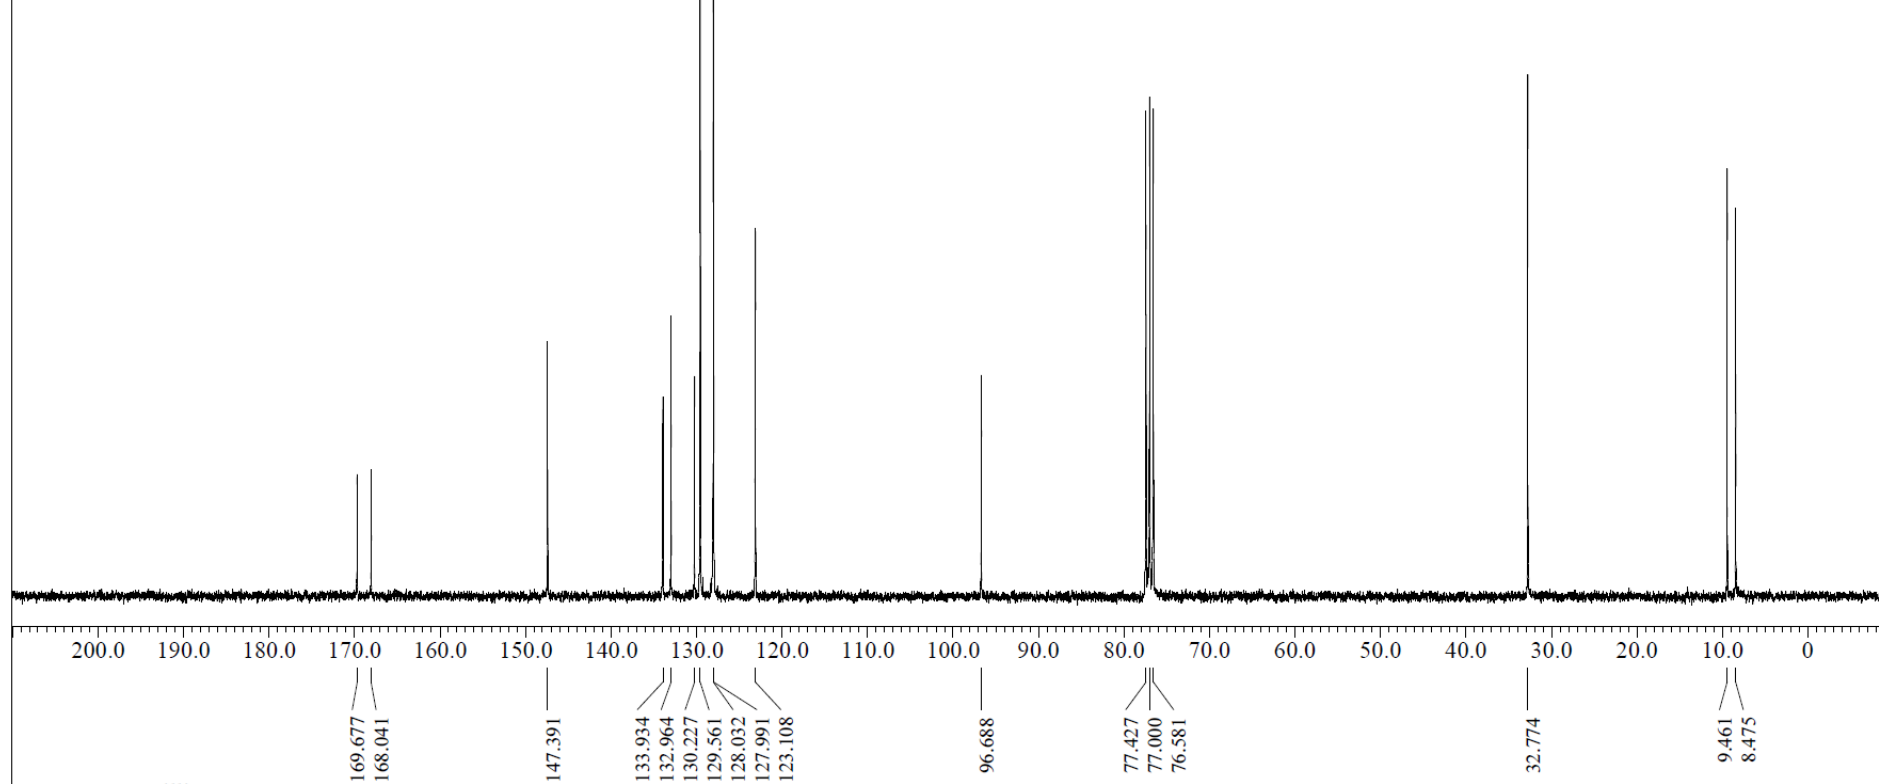

X : parts per Million :  $^{13}\text{C}$

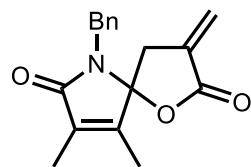

**5f**

( $^1\text{H}$  NMR, 300 MHz,  $\text{CDCl}_3$ )

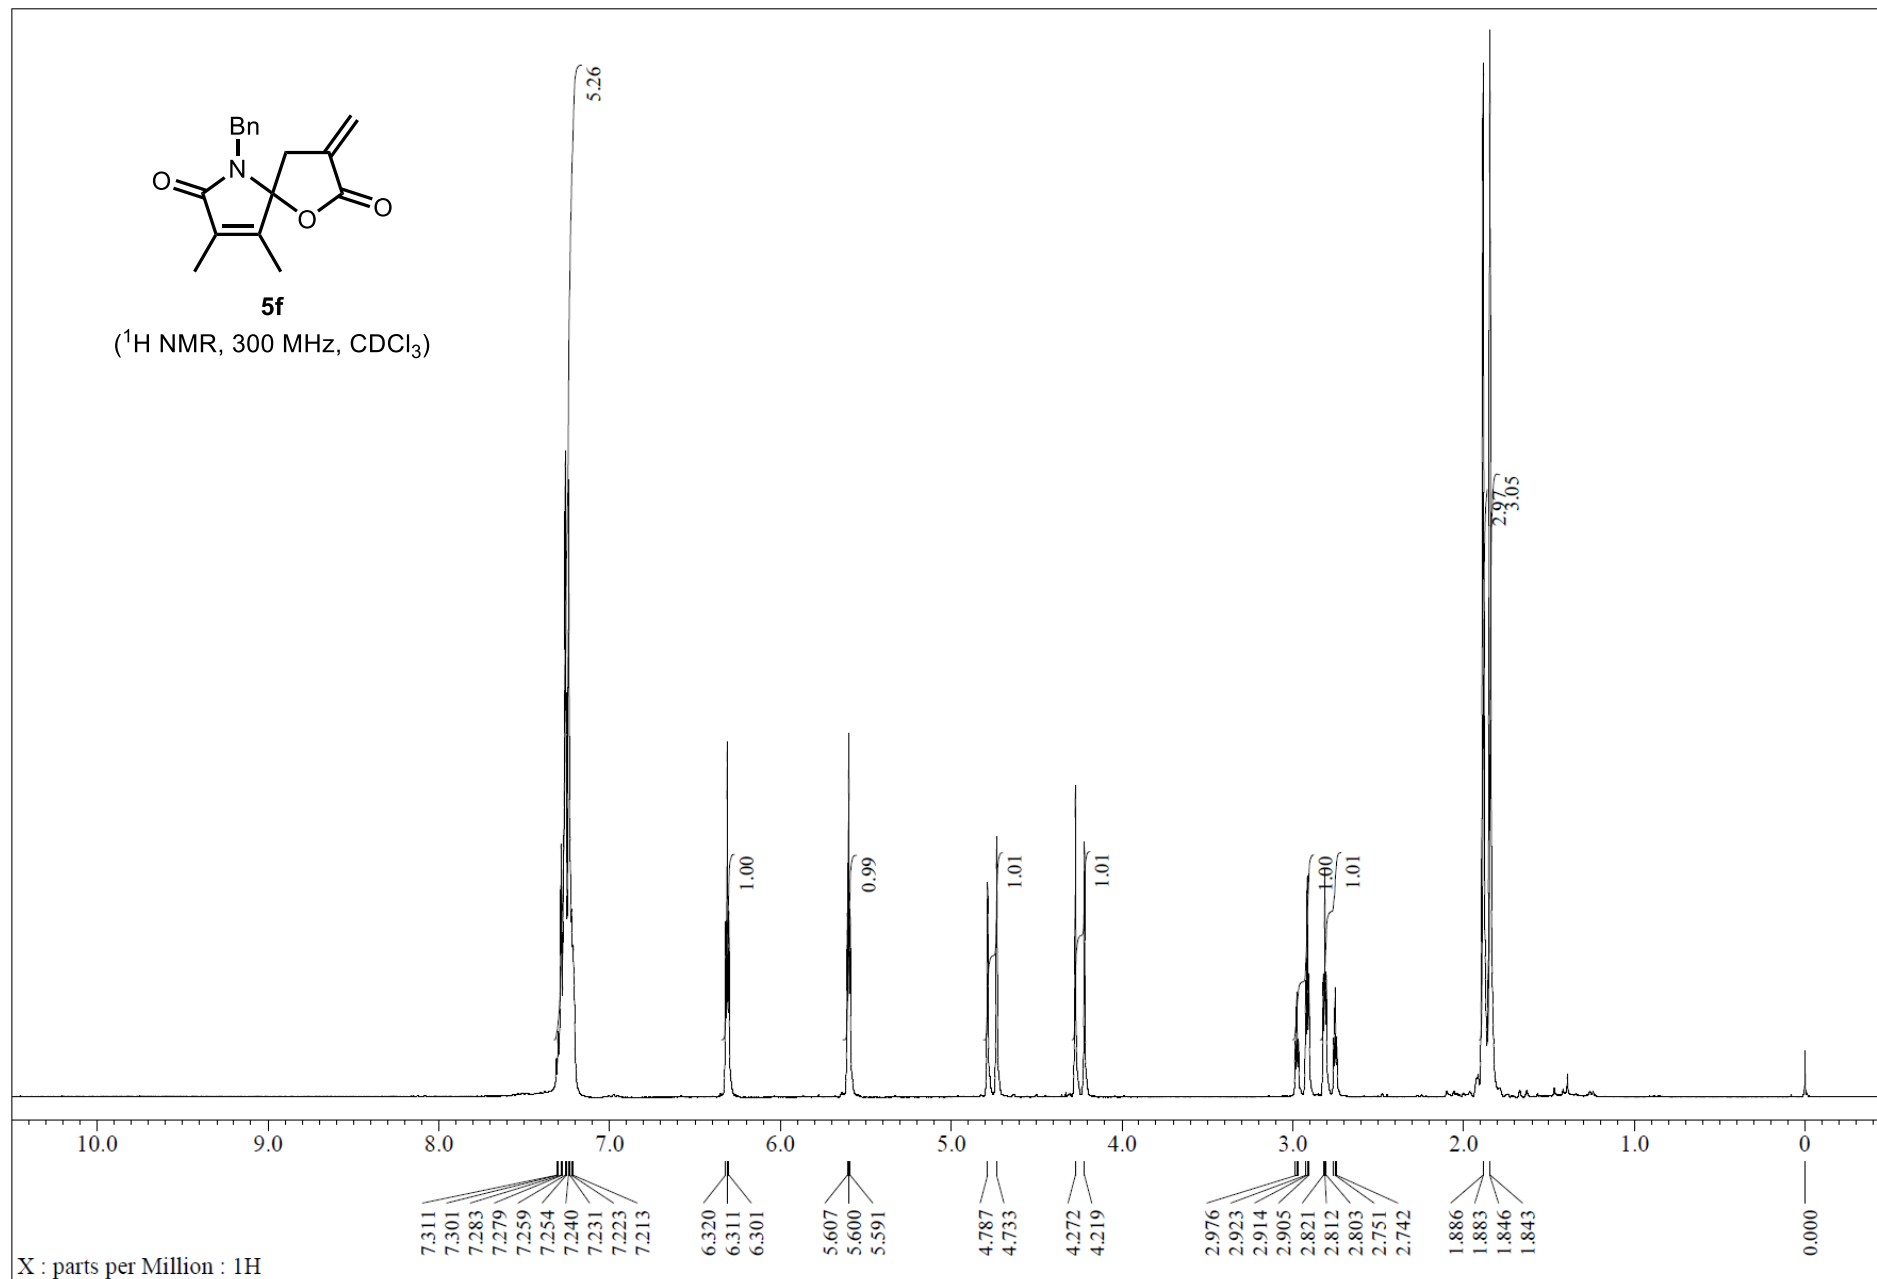

X : parts per Million :  $^1\text{H}$

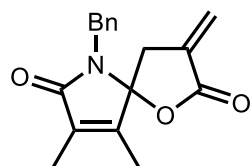

**5f**

( $^{13}\text{C}$  NMR, 75 MHz,  $\text{CDCl}_3$ )

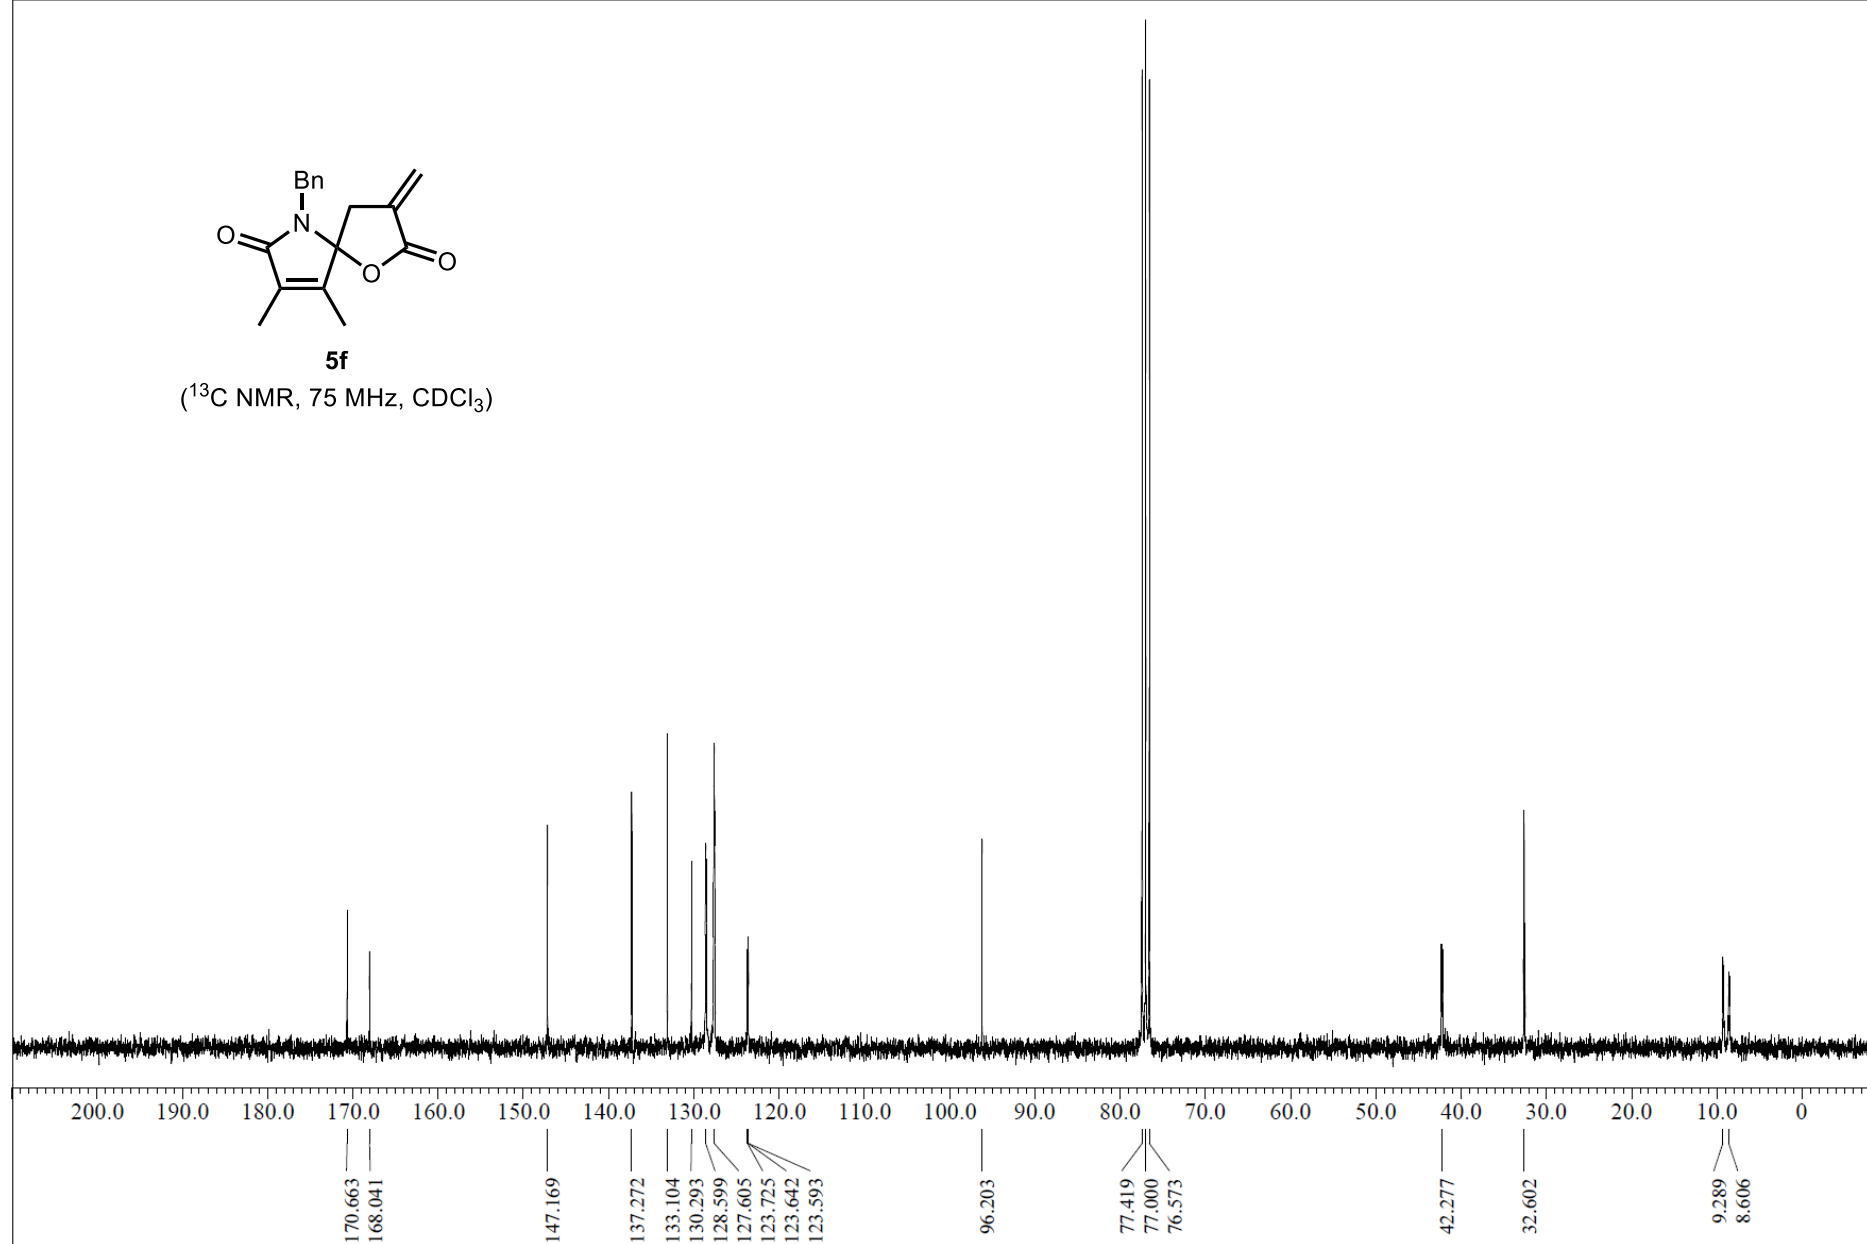

X : parts per Million :  $^{13}\text{C}$



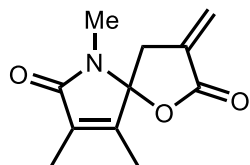

**5g**

(<sup>1</sup>H NMR, 300 MHz, CDCl<sub>3</sub>)

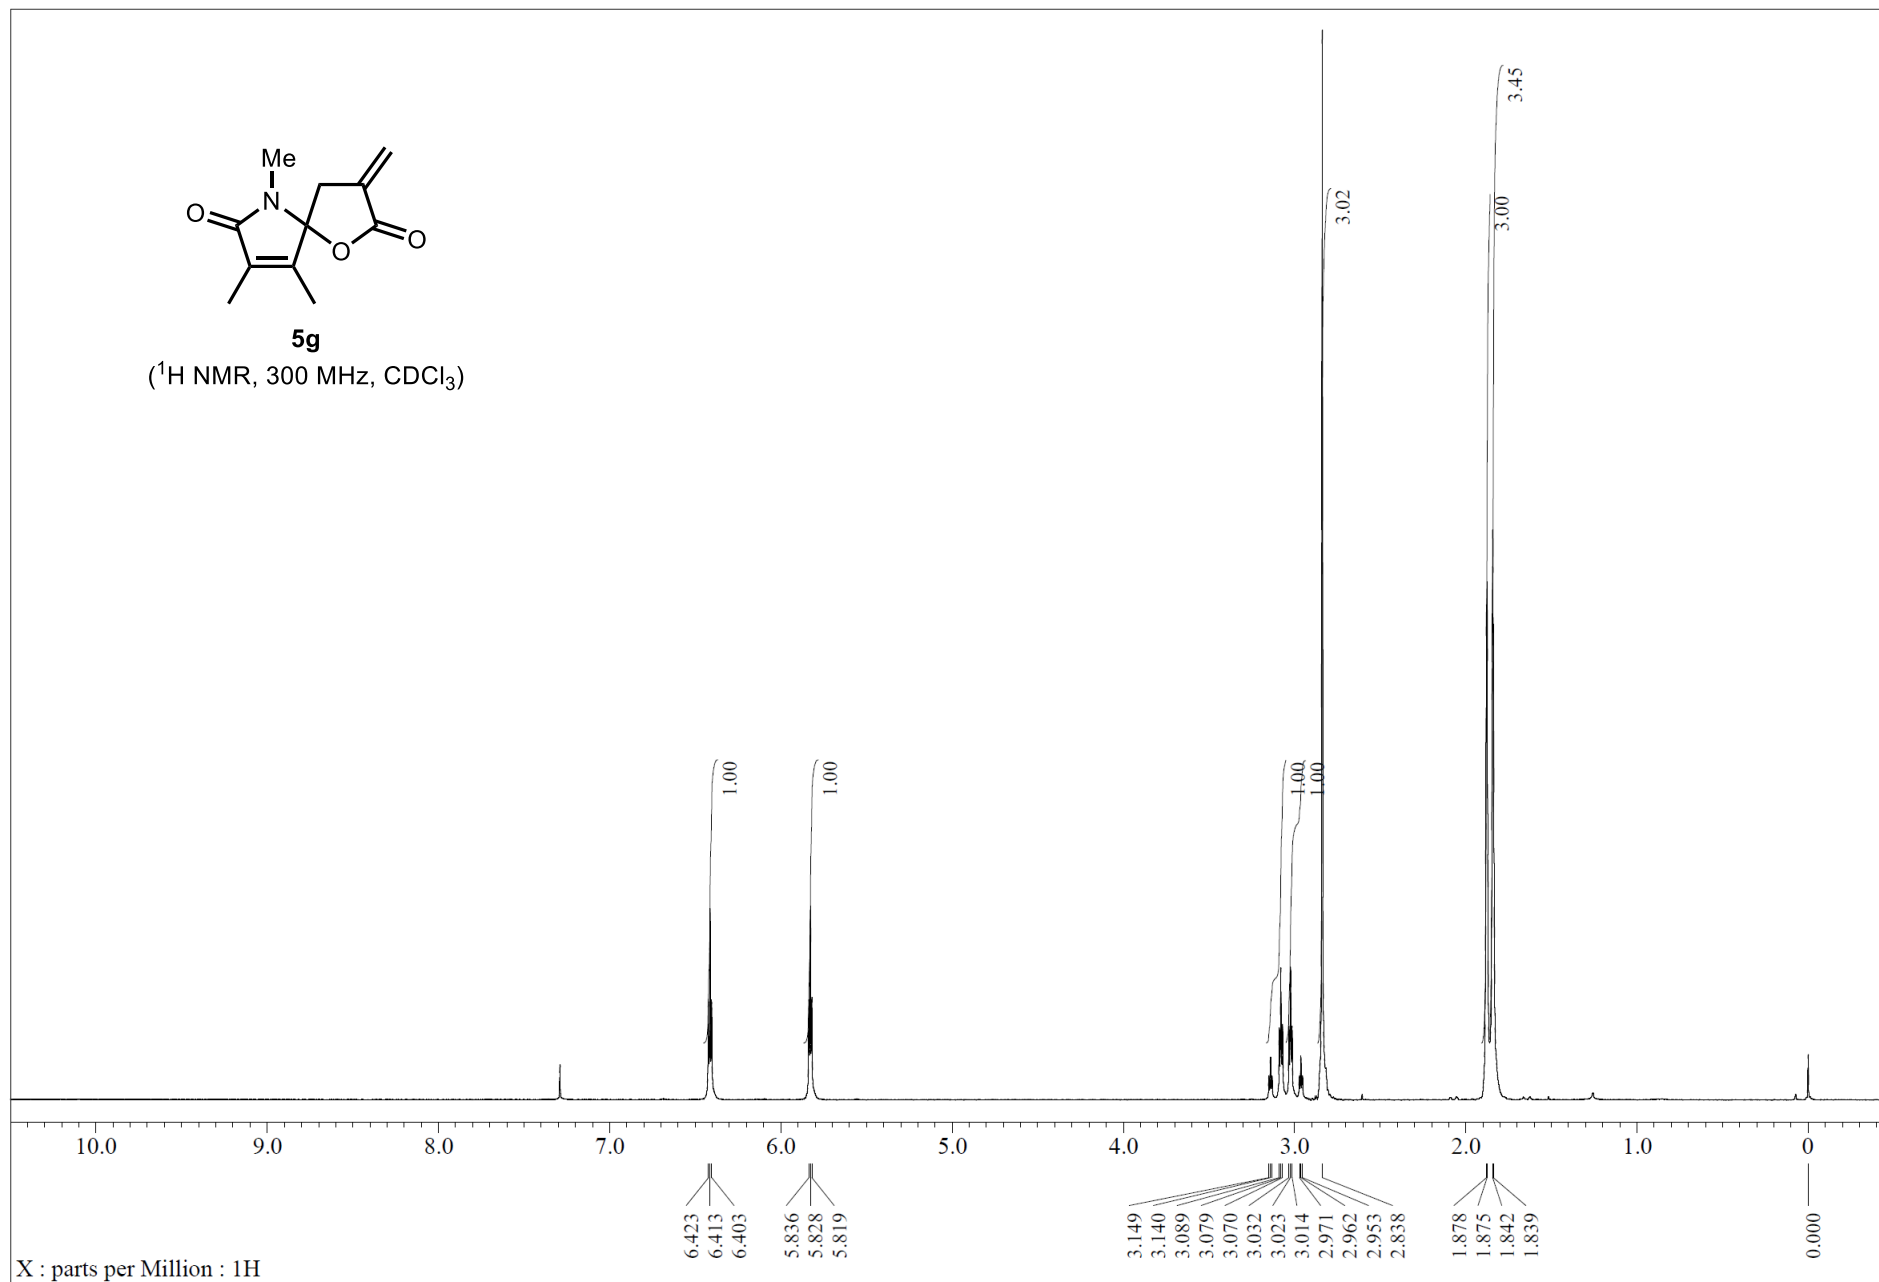

X : parts per Million : 1H

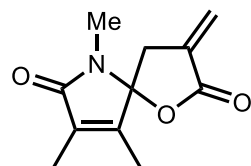

**5g**

( $^{13}\text{C}$  NMR, 75 MHz,  $\text{CDCl}_3$ )

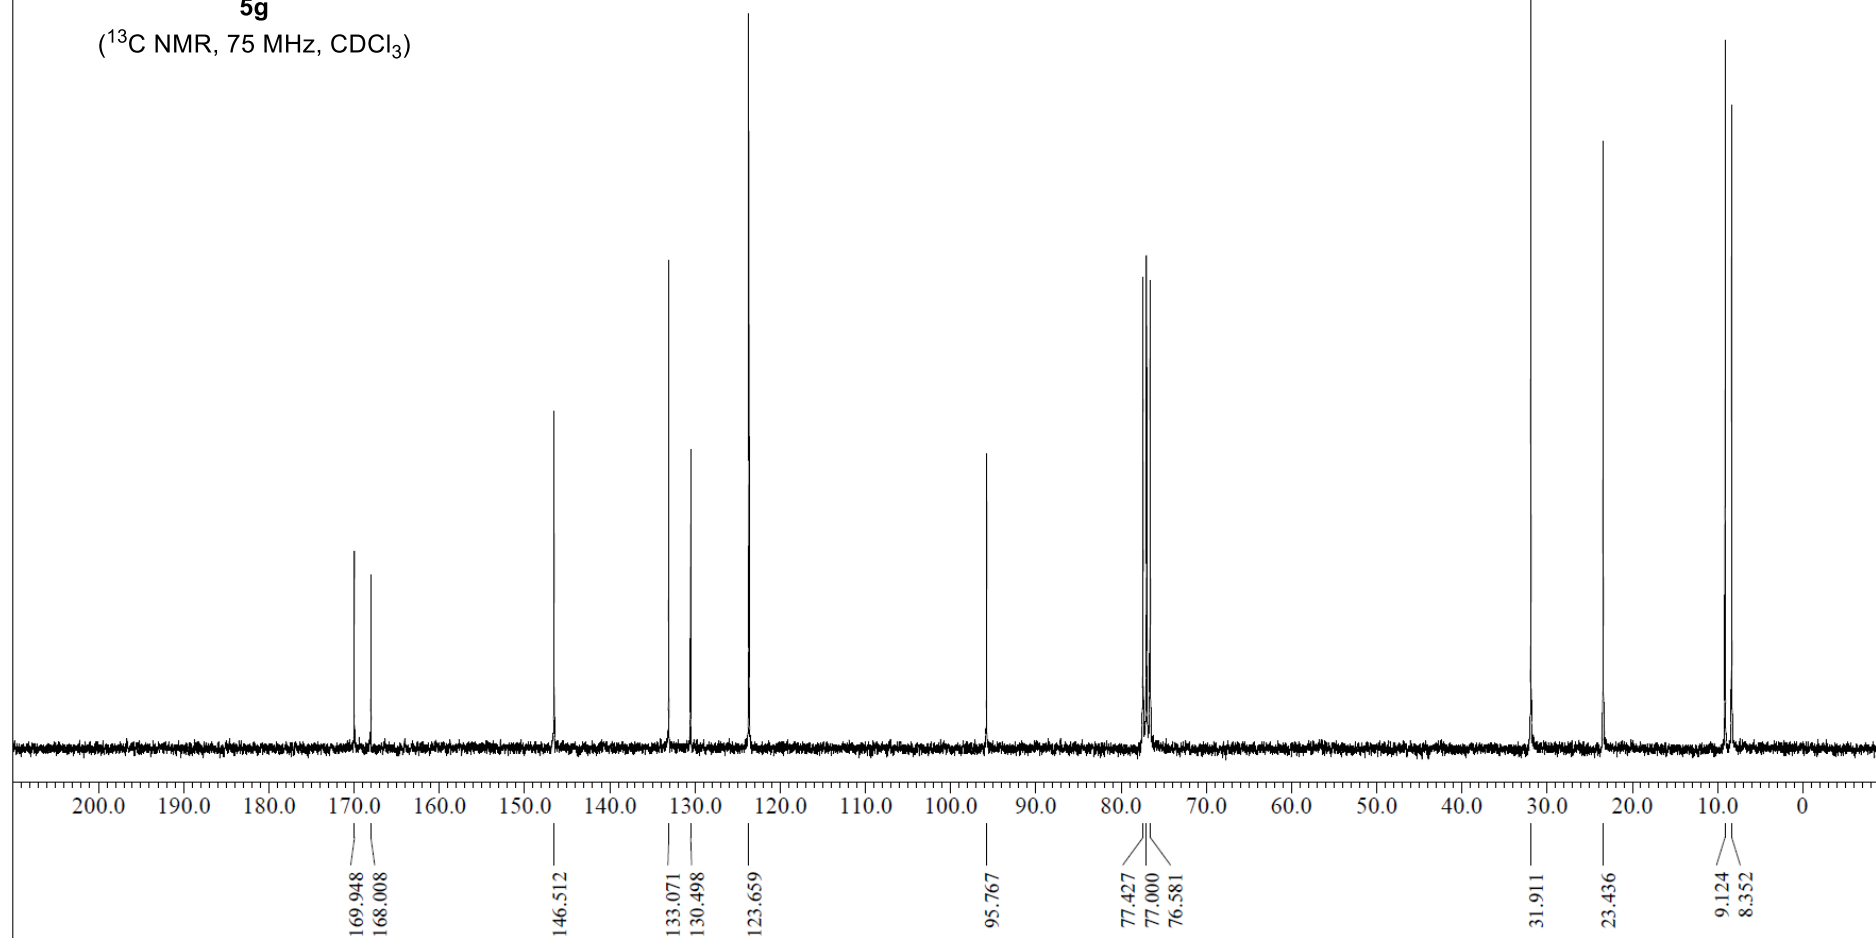

X : parts per Million :  $^{13}\text{C}$

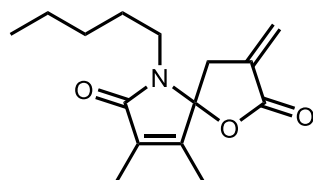

**5h**

( $^1\text{H}$  NMR, 300 MHz,  $\text{CDCl}_3$ )

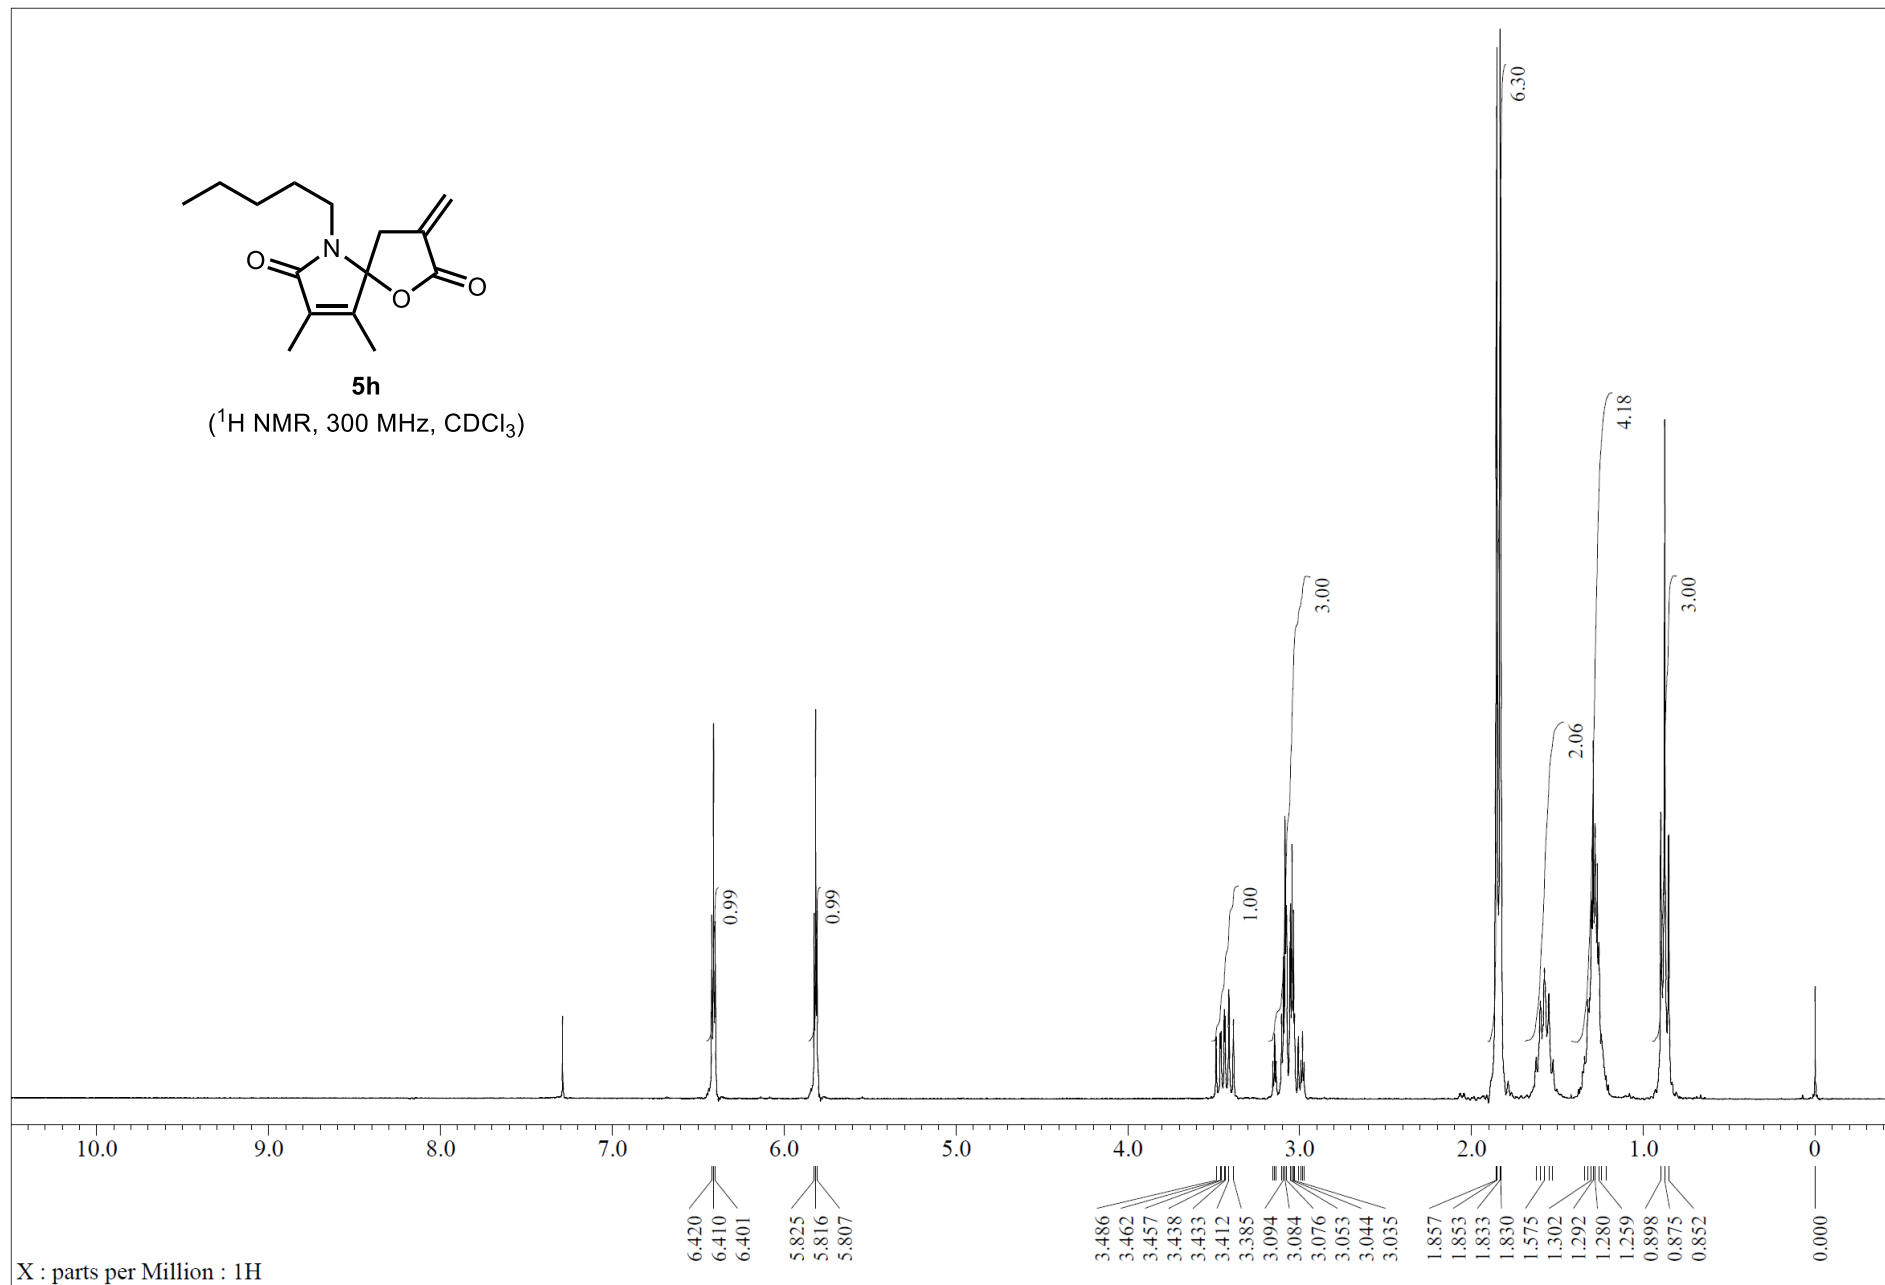

X : parts per Million :  $^1\text{H}$

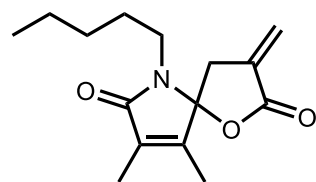

**5h**  
 ( $^{13}\text{C}$  NMR, 75 MHz,  $\text{CDCl}_3$ )

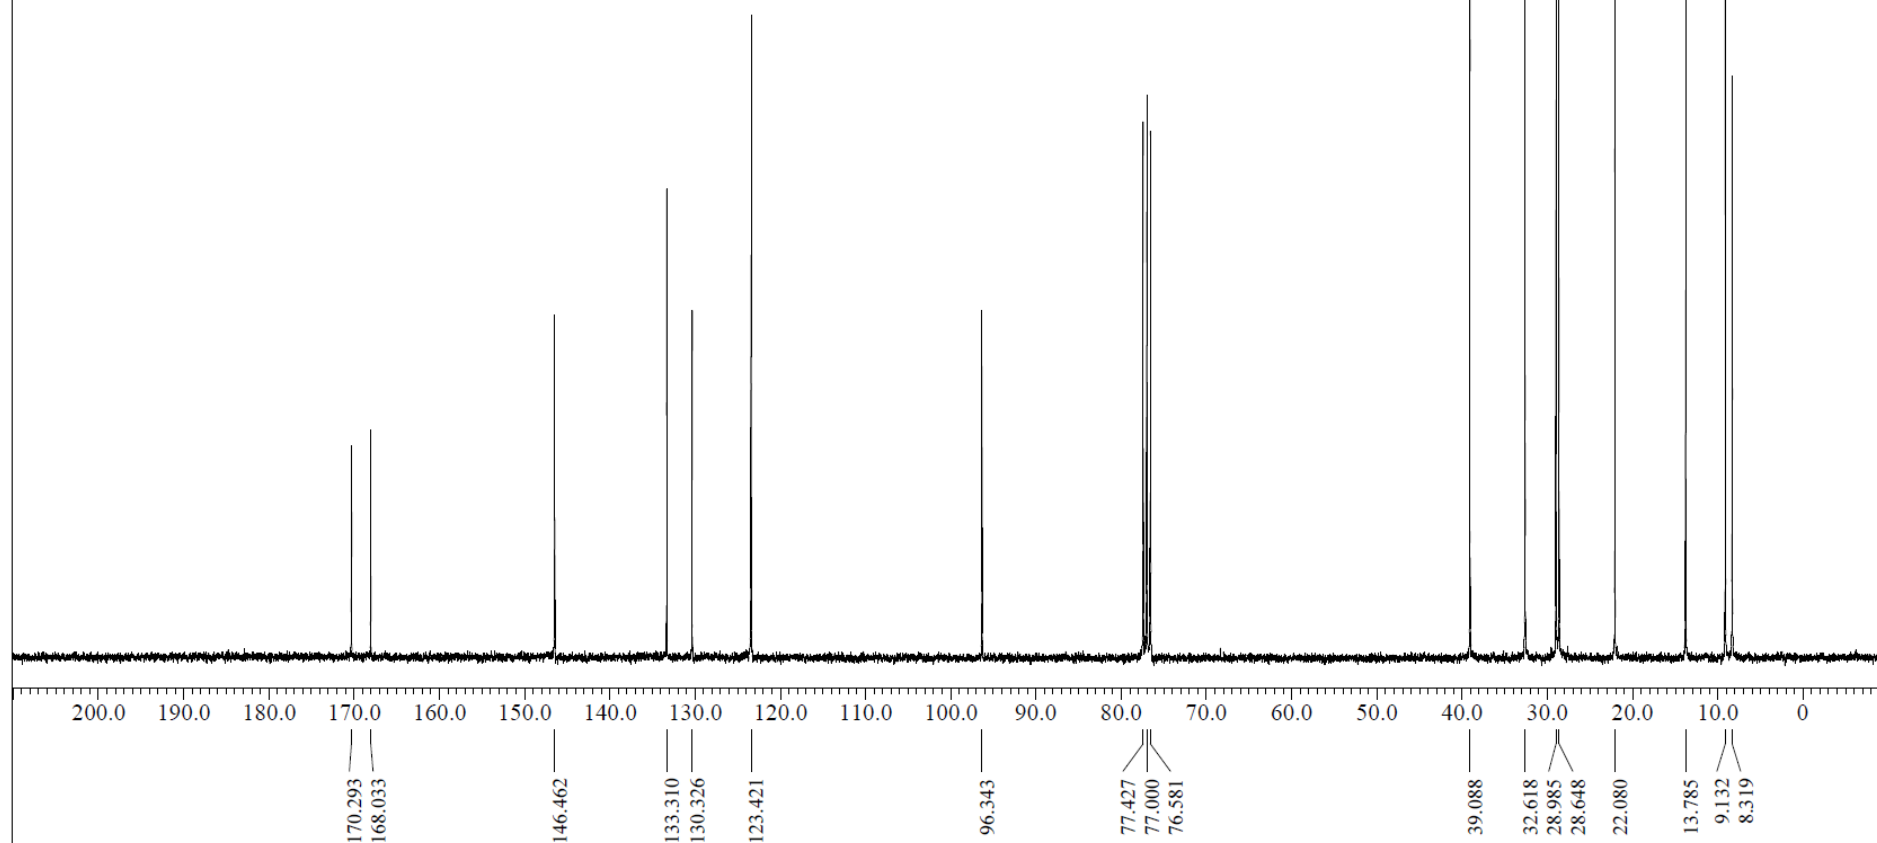

X : parts per Million :  $^{13}\text{C}$

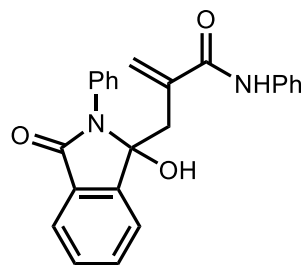

**6a**

( $^1\text{H}$  NMR, 300 MHz,  $\text{CDCl}_3/\text{CD}_3\text{OD} = 1/1$ )

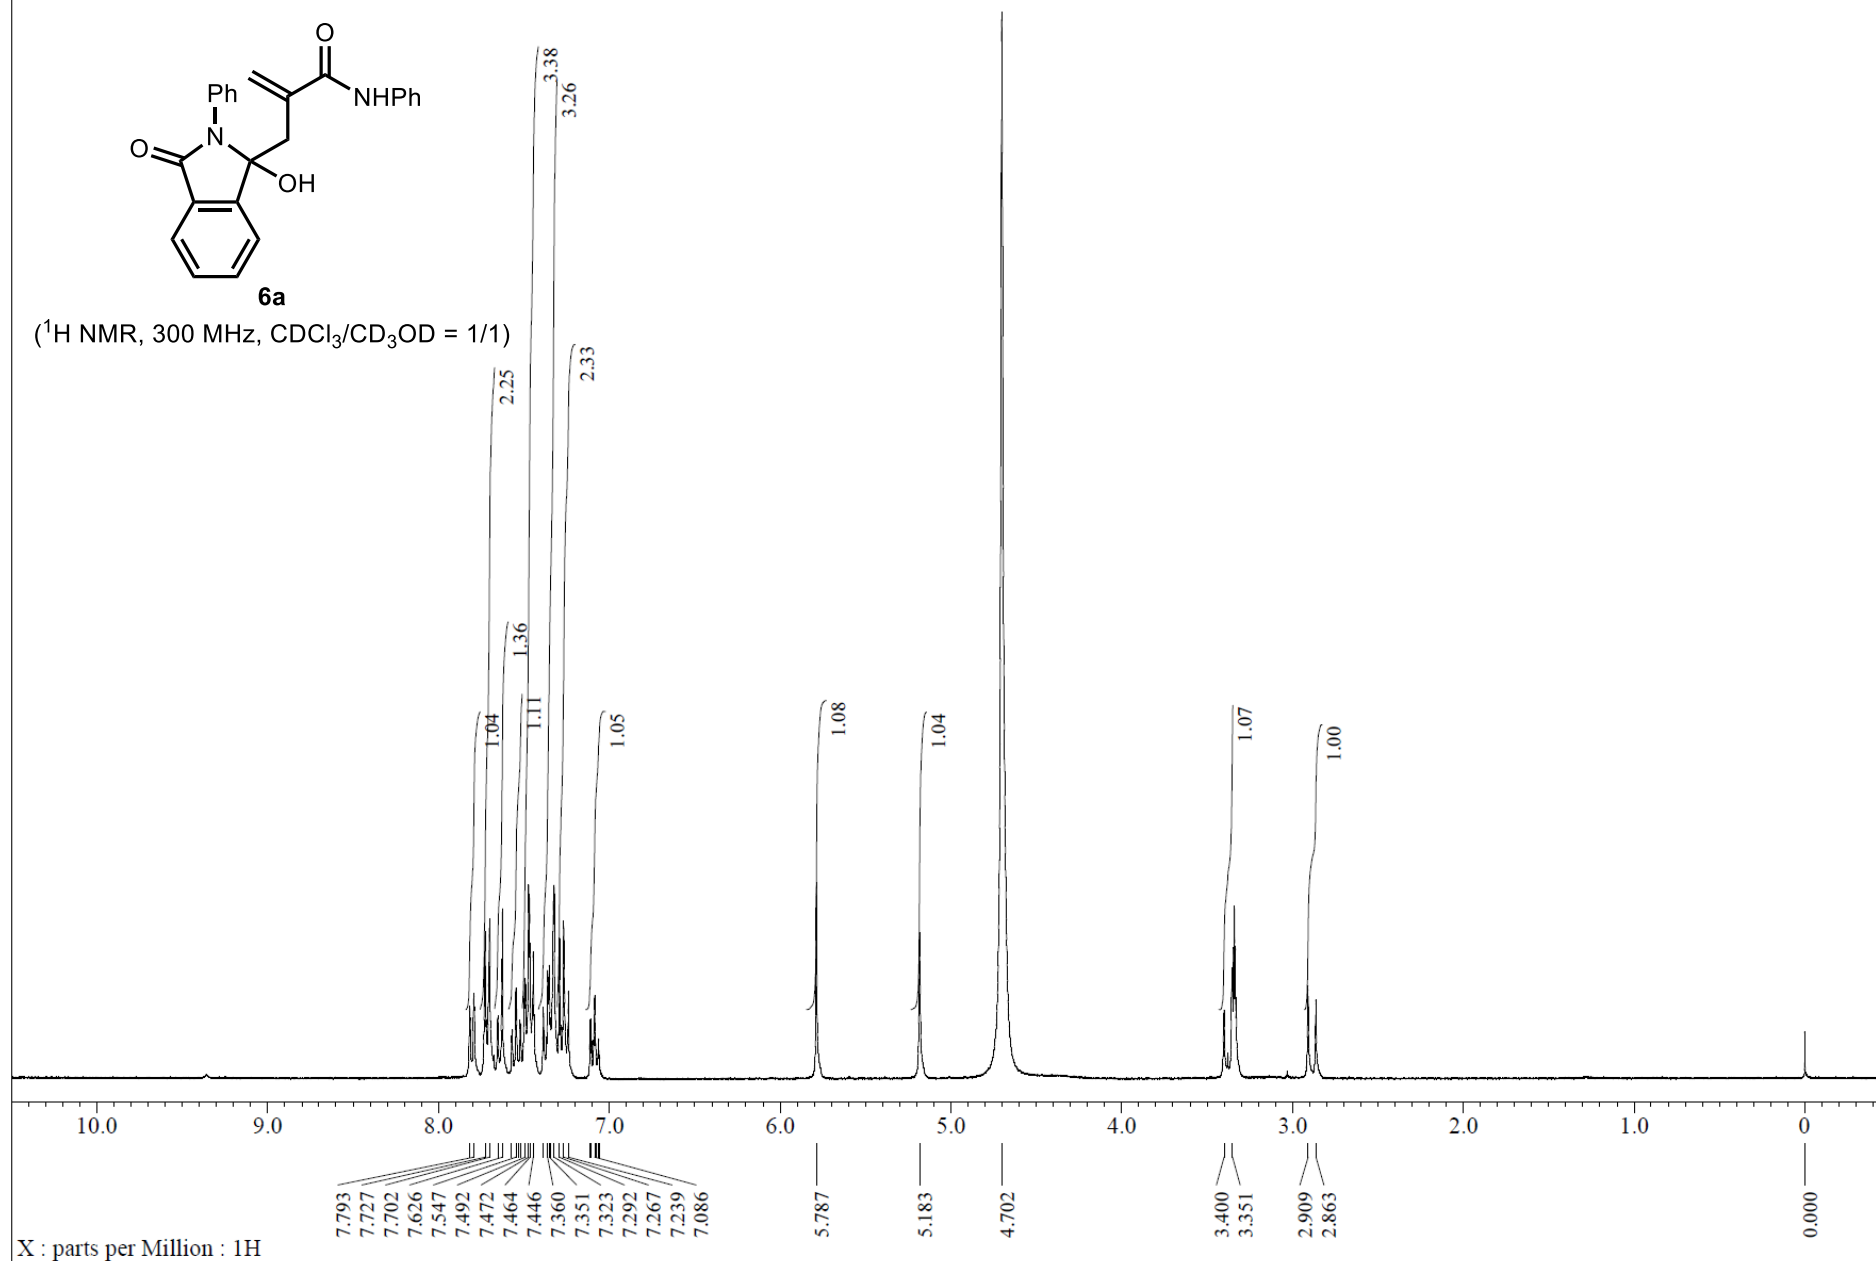

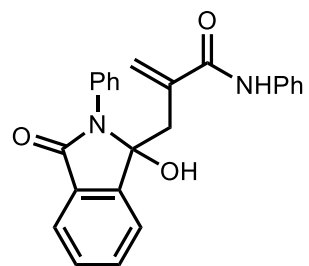

**6a**

( $^{13}\text{C}$  NMR, 75 MHz,  $\text{CDCl}_3/\text{CD}_3\text{OD} = 1/1$ )

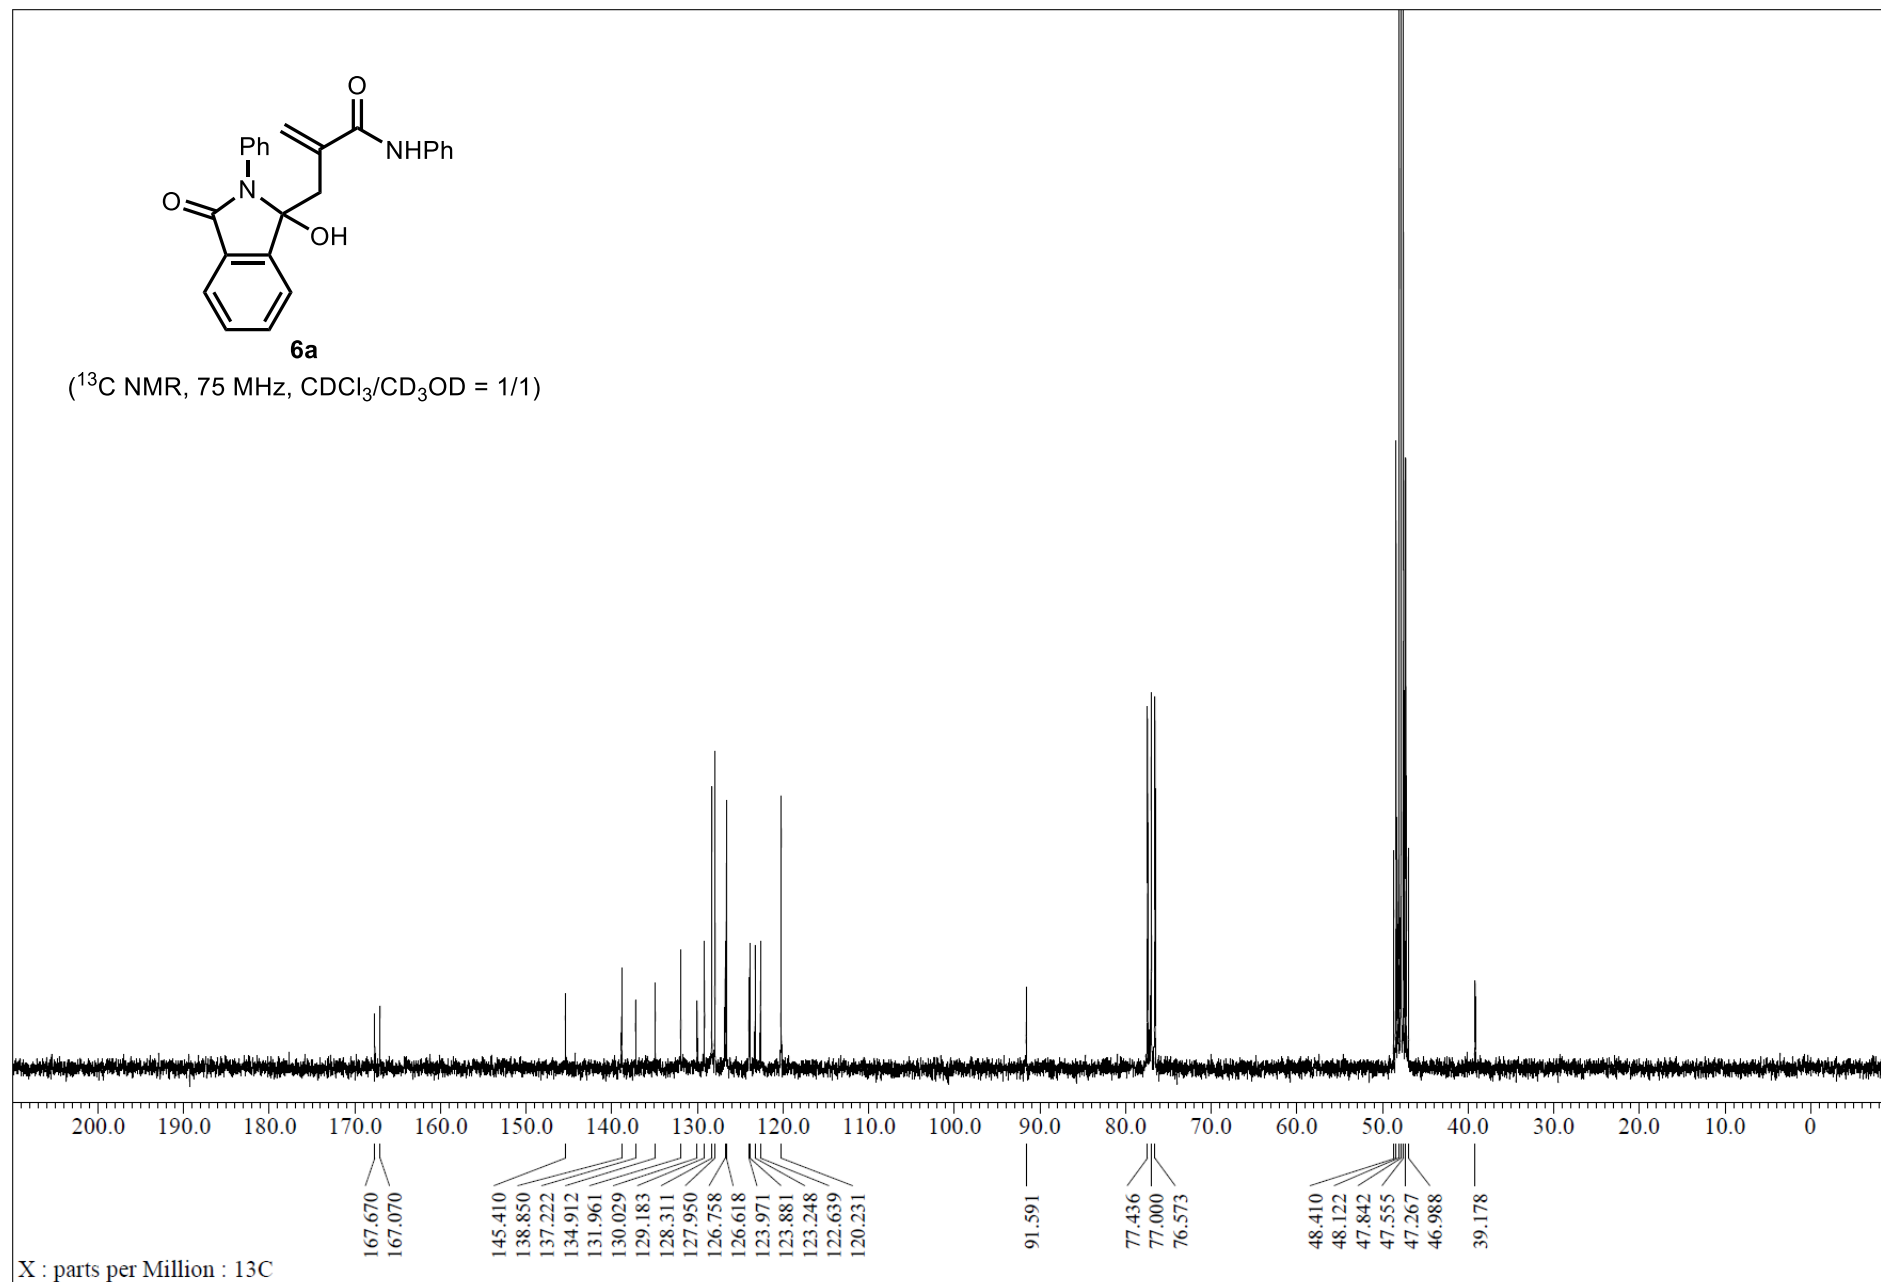

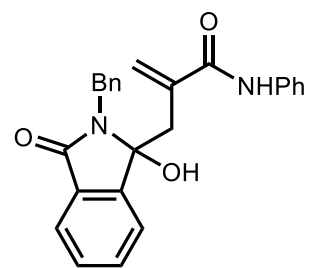

**6b**  
 $^1\text{H}$  NMR, 300 MHz,  $\text{CDCl}_3$ )

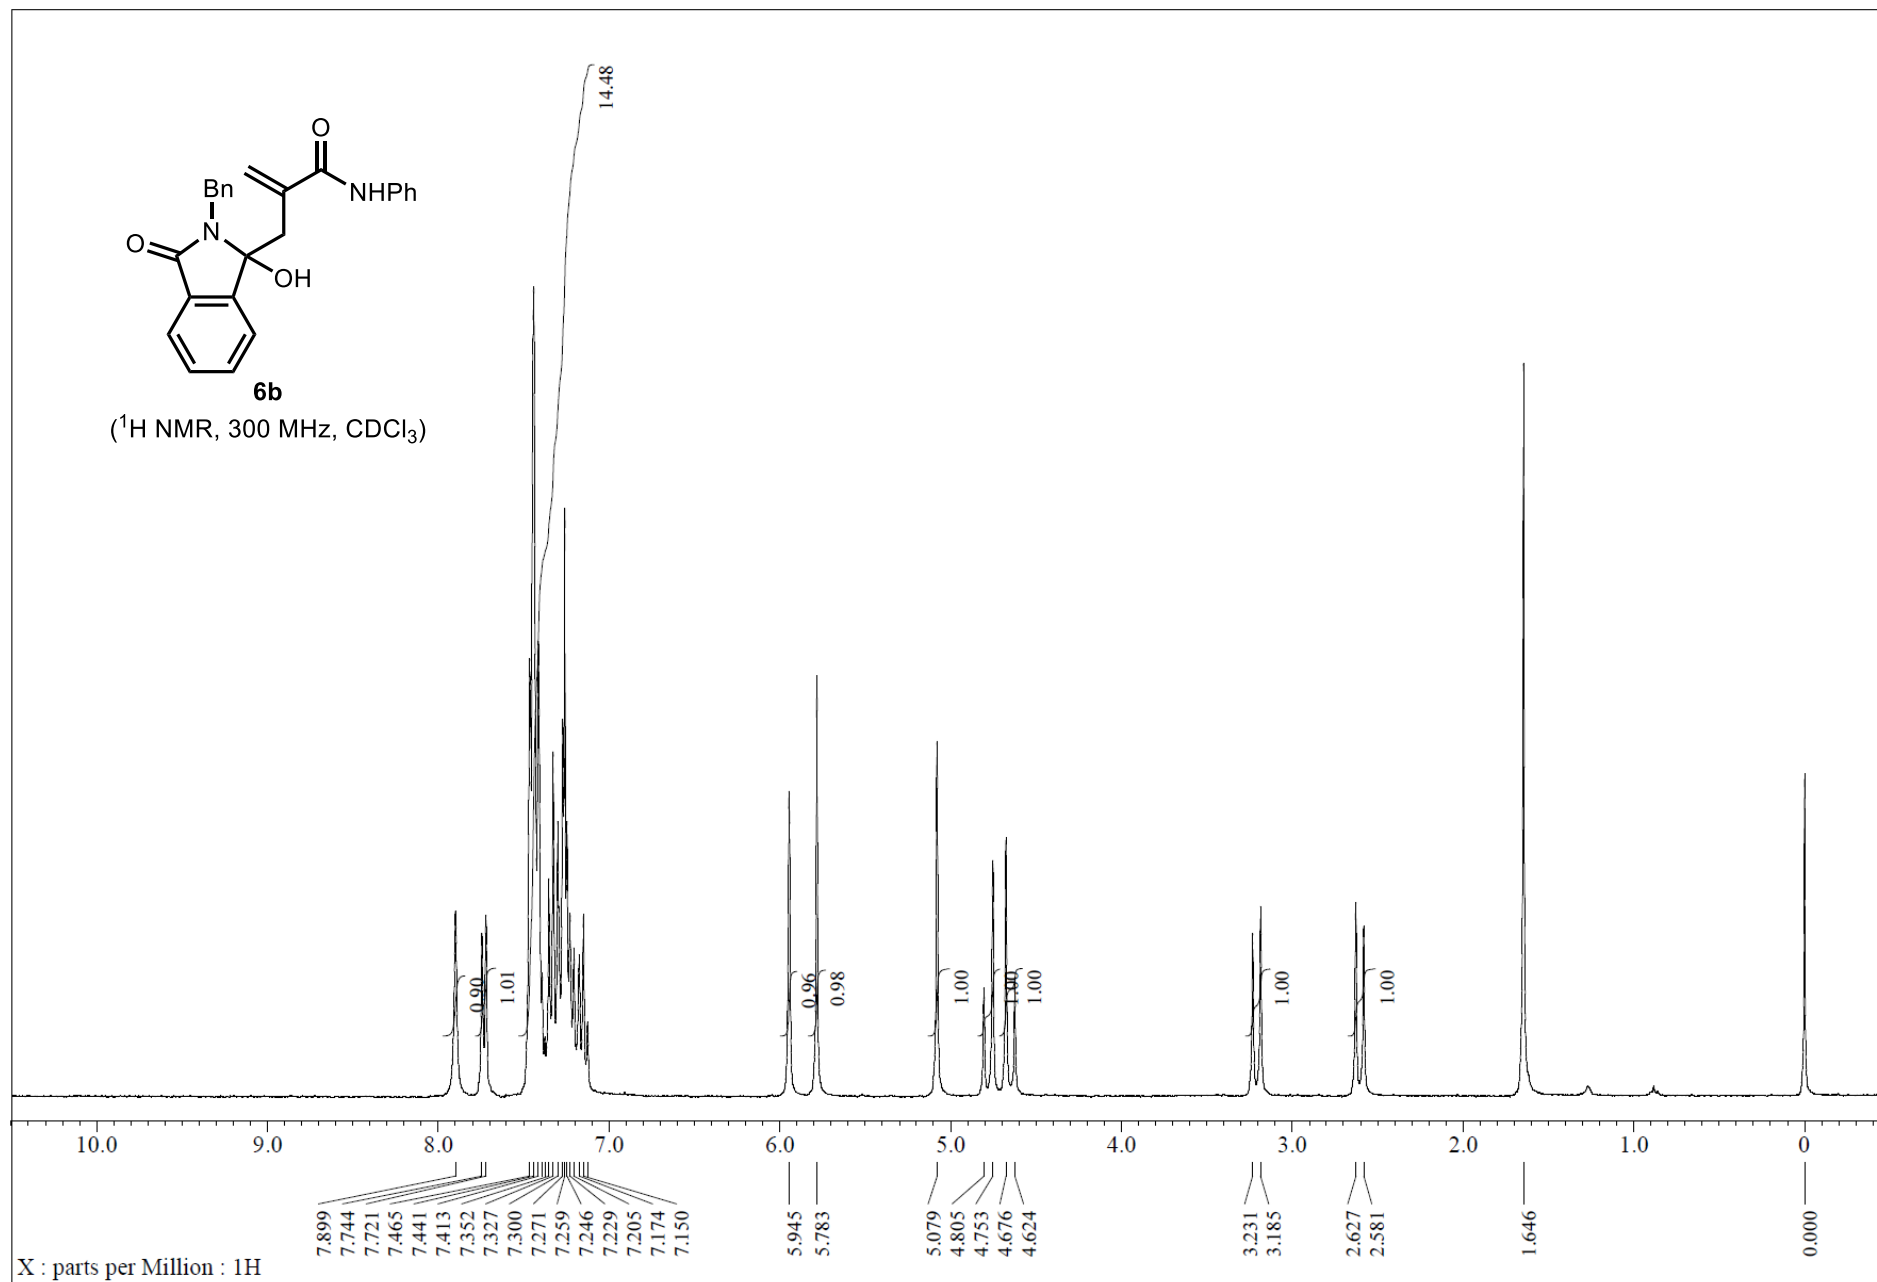

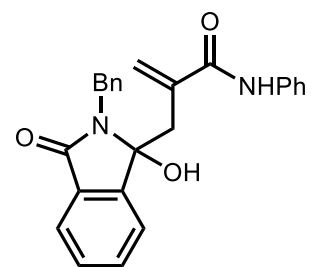

**6b**

( $^{13}\text{C}$  NMR, 75 MHz,  $\text{CDCl}_3$ )

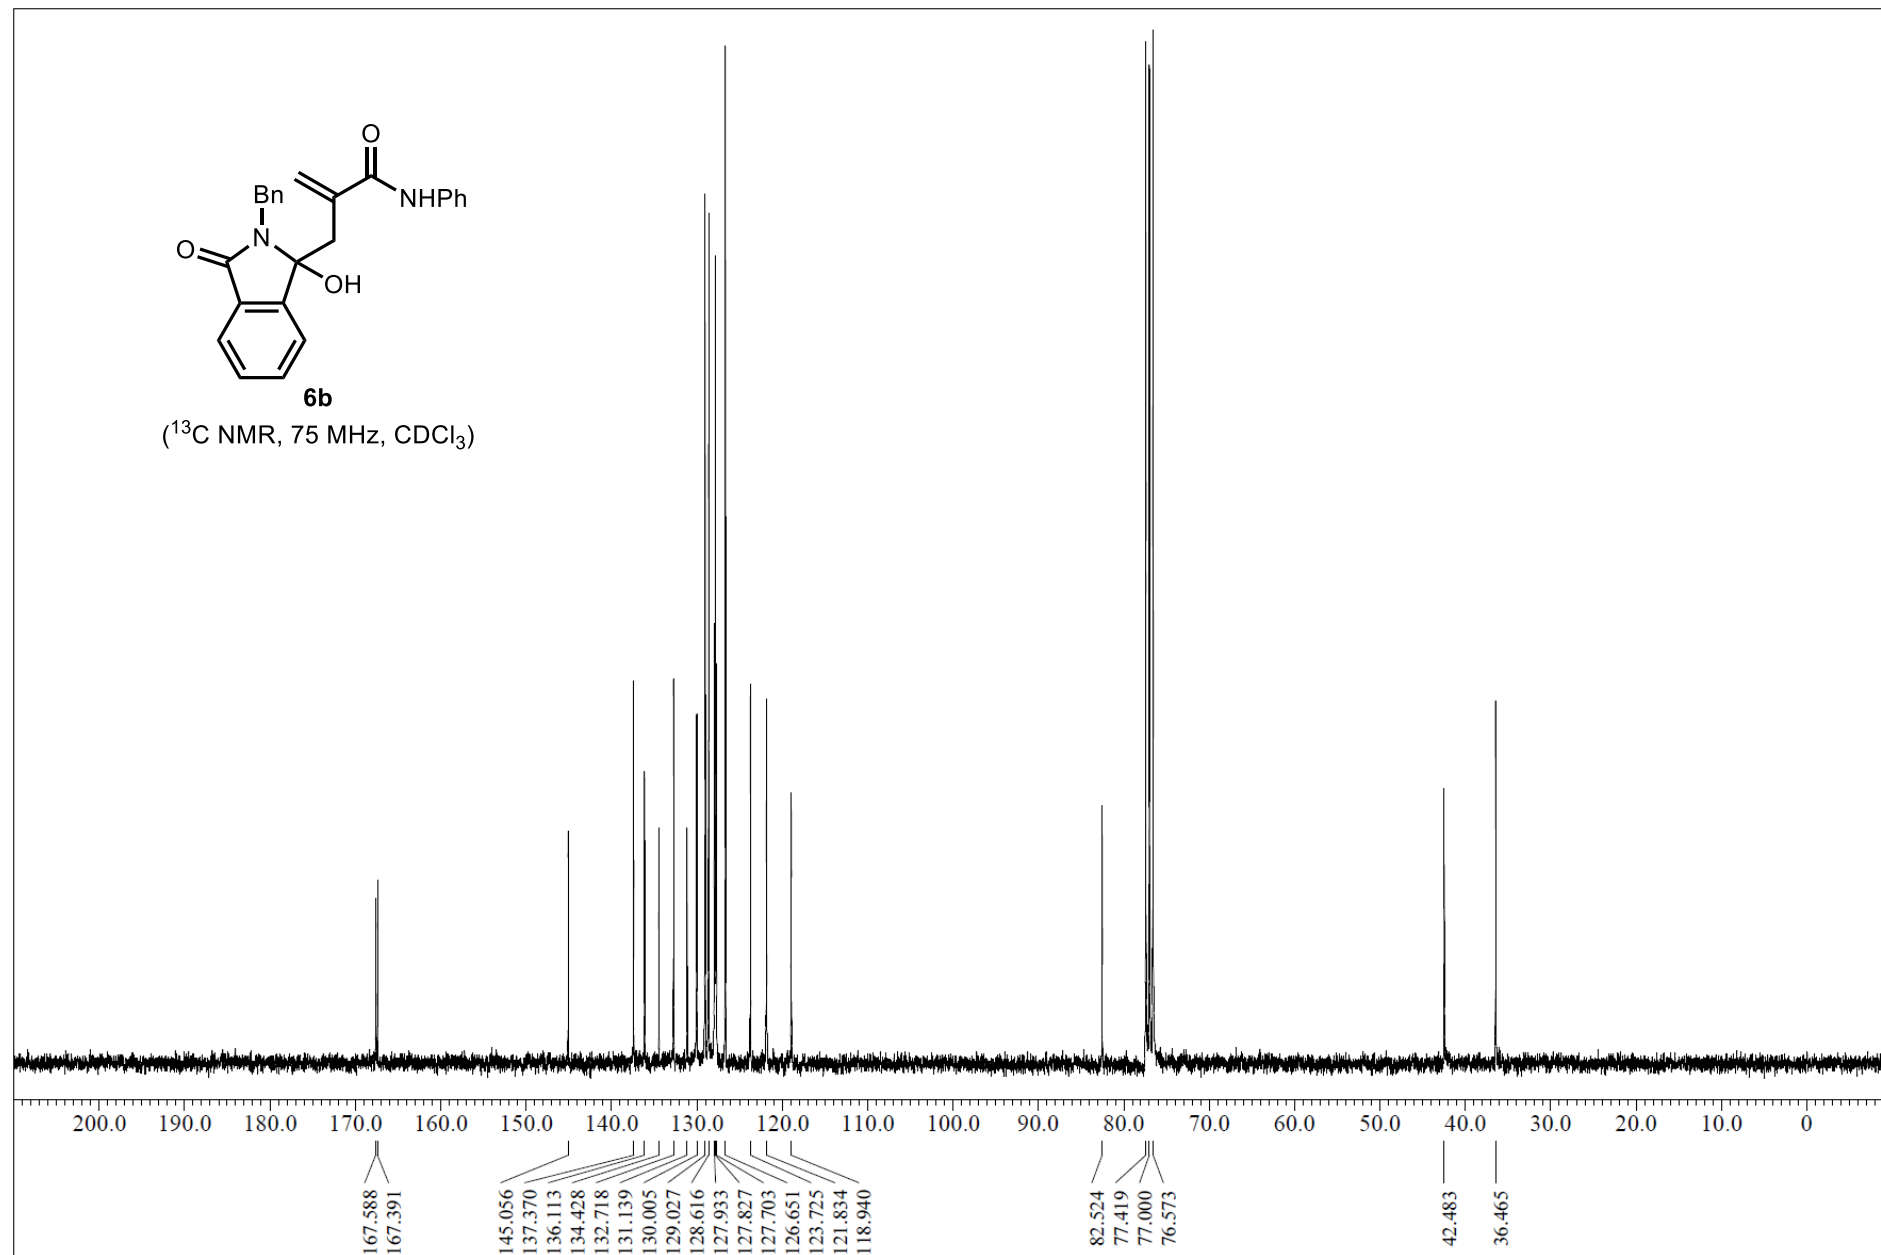

X : parts per Million :  $^{13}\text{C}$



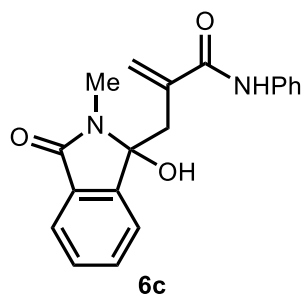

( $^1\text{H}$  NMR, 300 MHz,  $\text{CDCl}_3/\text{CD}_3\text{OD} = 1/1$ )

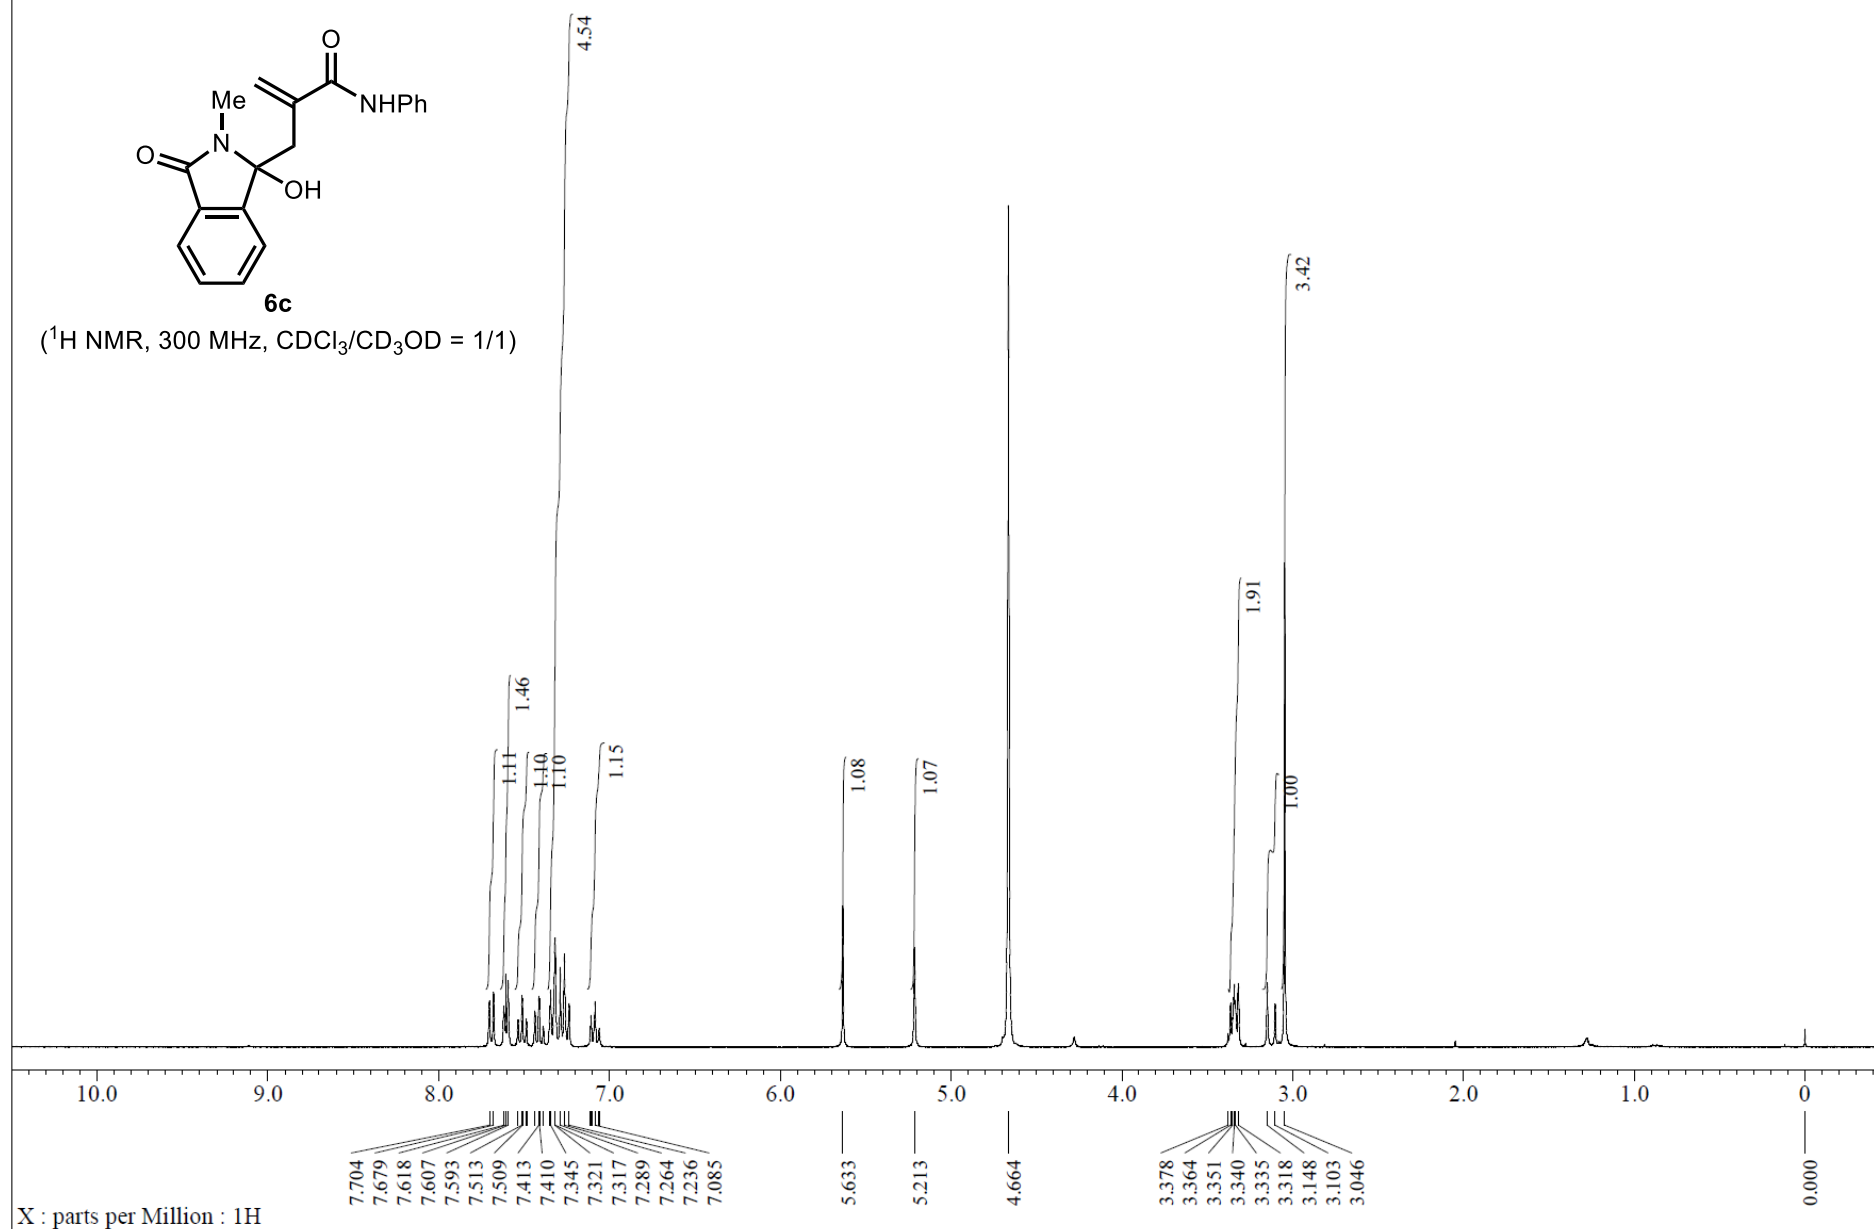

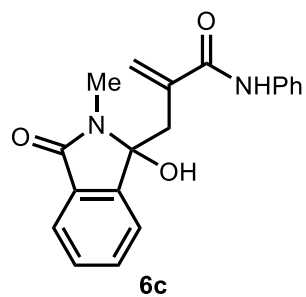

( $^{13}\text{C}$  NMR, 75 MHz,  $\text{CDCl}_3/\text{CD}_3\text{OD} = 1/1$ )

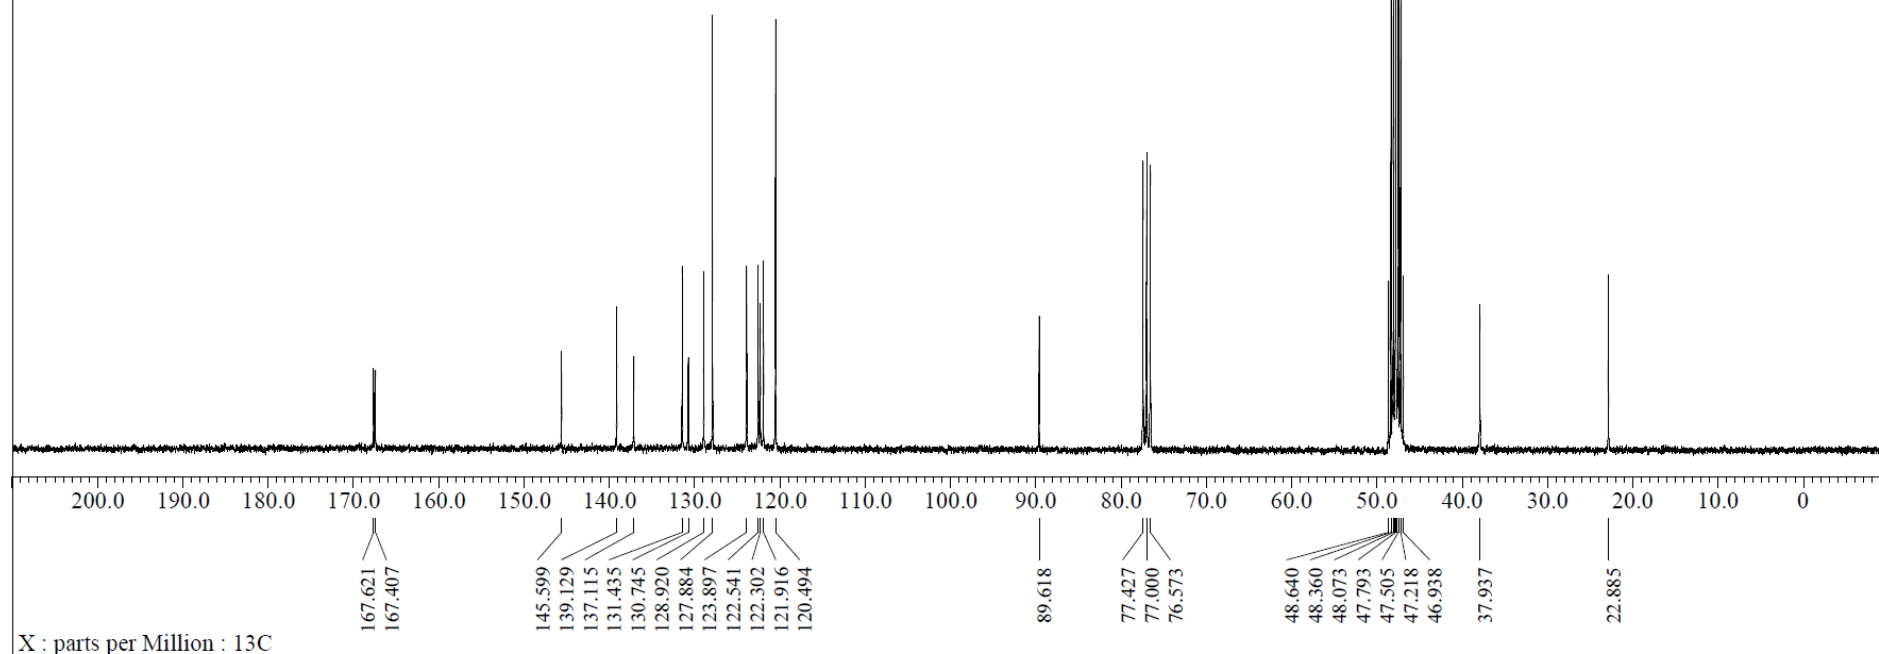

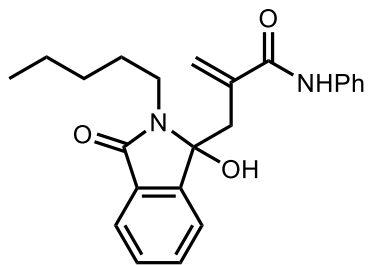

**6d**

( $^1\text{H}$  NMR, 300 MHz,  $\text{CDCl}_3/\text{CD}_3\text{OD} = 1/1$ )

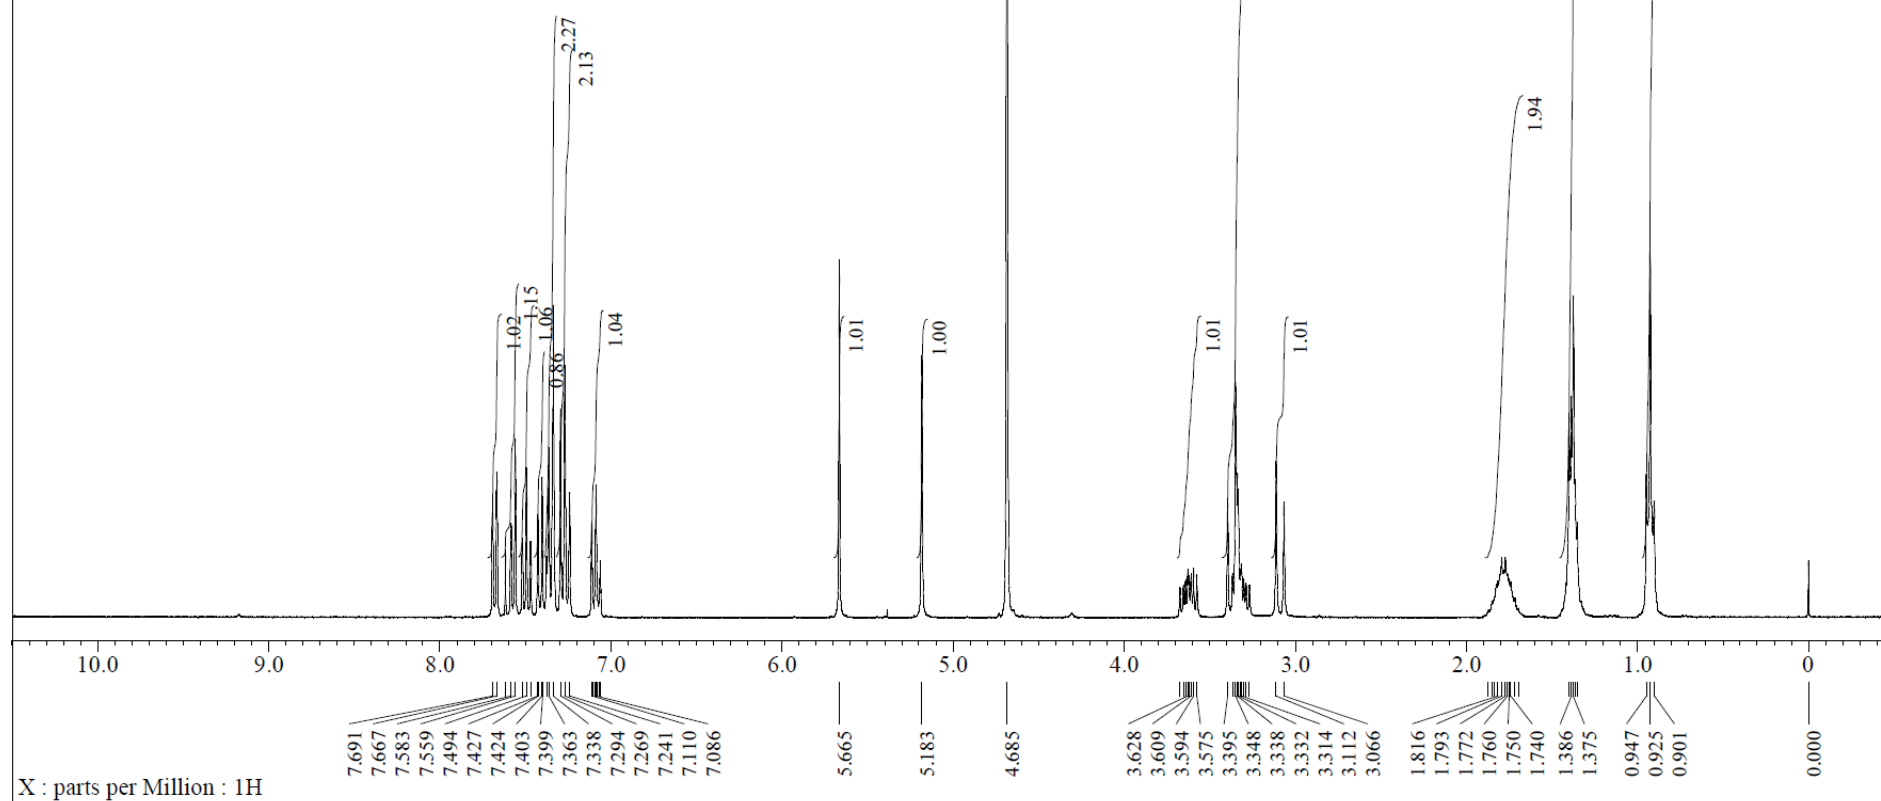

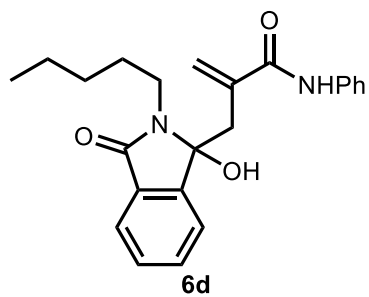

( $^{13}\text{C}$  NMR, 75 MHz,  $\text{CDCl}_3/\text{CD}_3\text{OD} = 1/1$ )

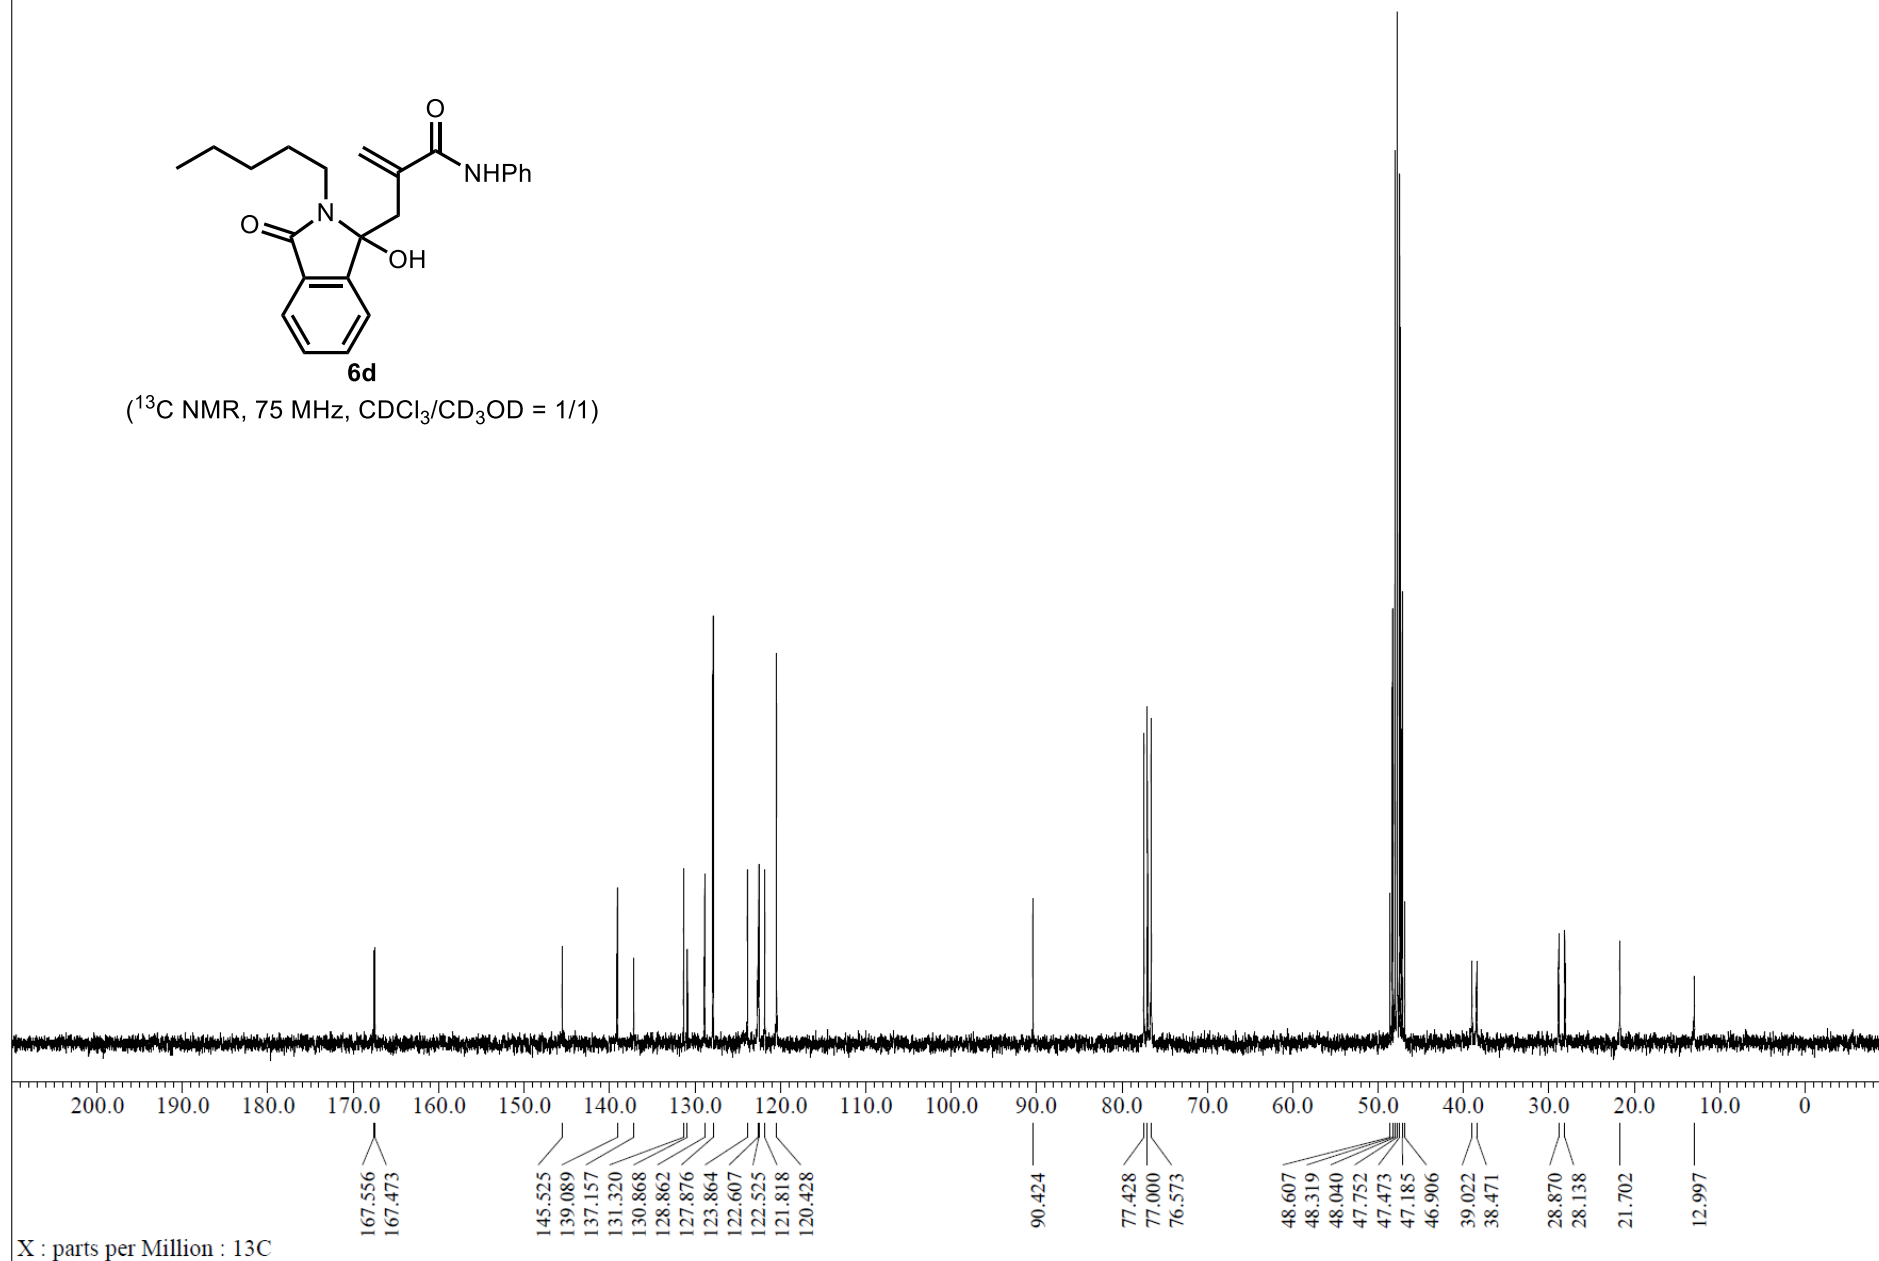

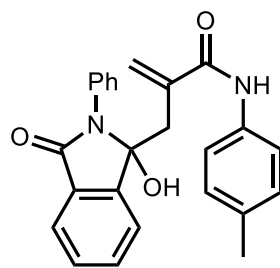

**6e**

( $^1\text{H}$  NMR, 300 MHz,  $\text{CDCl}_3/\text{CD}_3\text{OD} = 1/1$ )

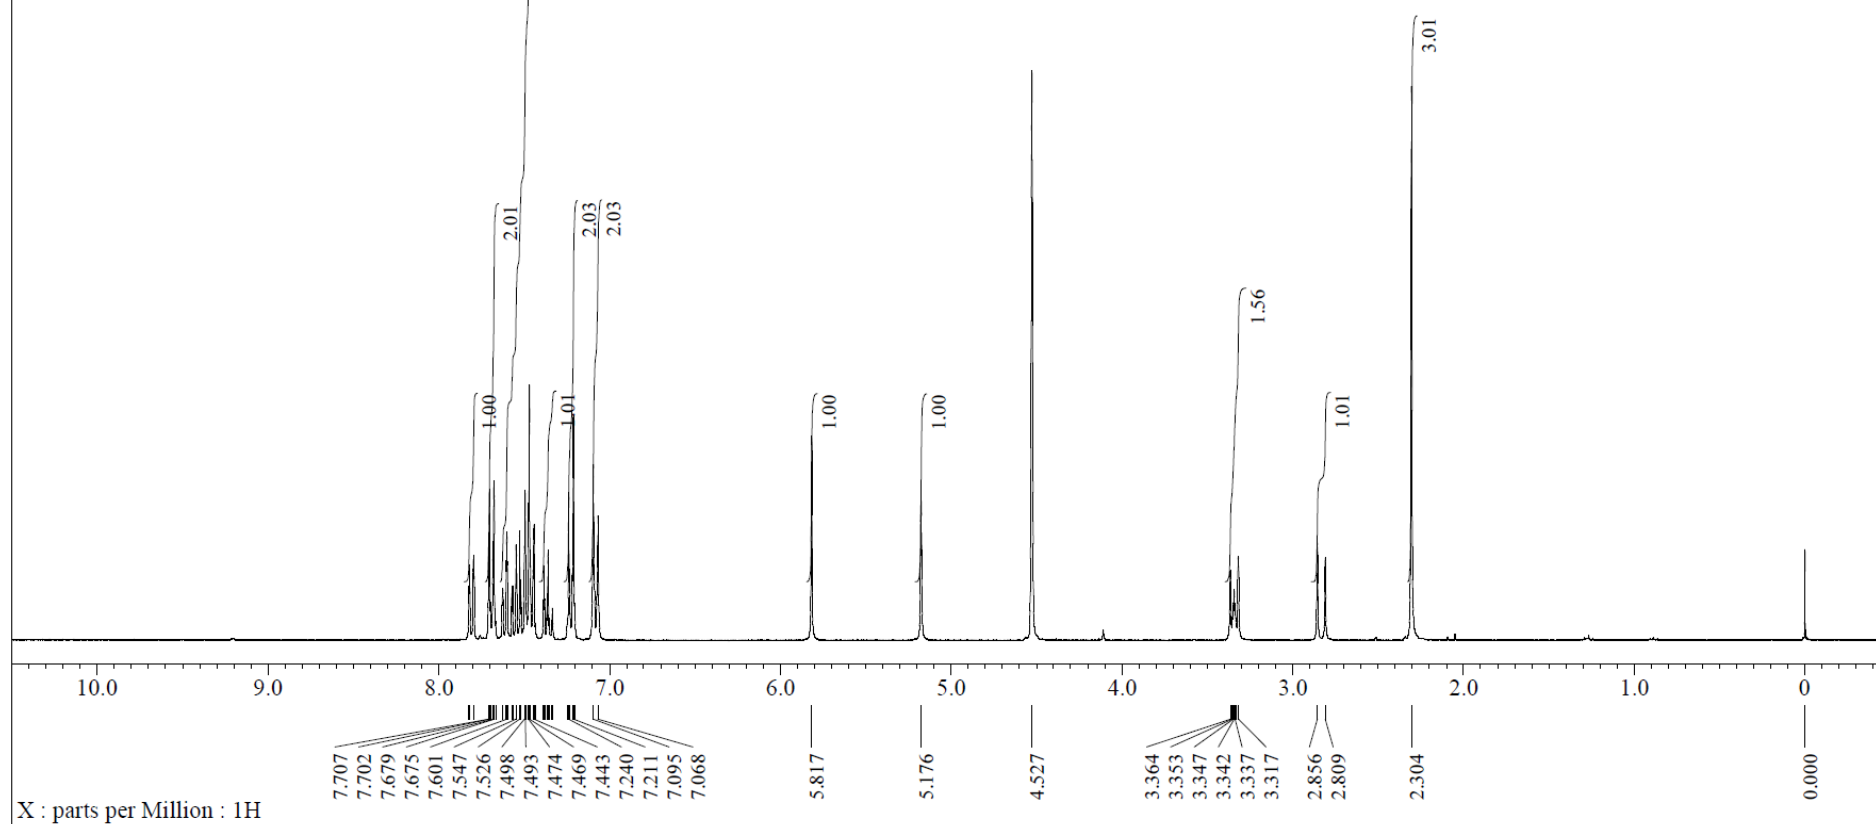

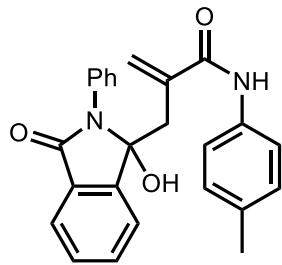

**6e**

( $^{13}\text{C}$  NMR, 75 MHz,  $\text{CDCl}_3/\text{CD}_3\text{OD} = 1/1$ )

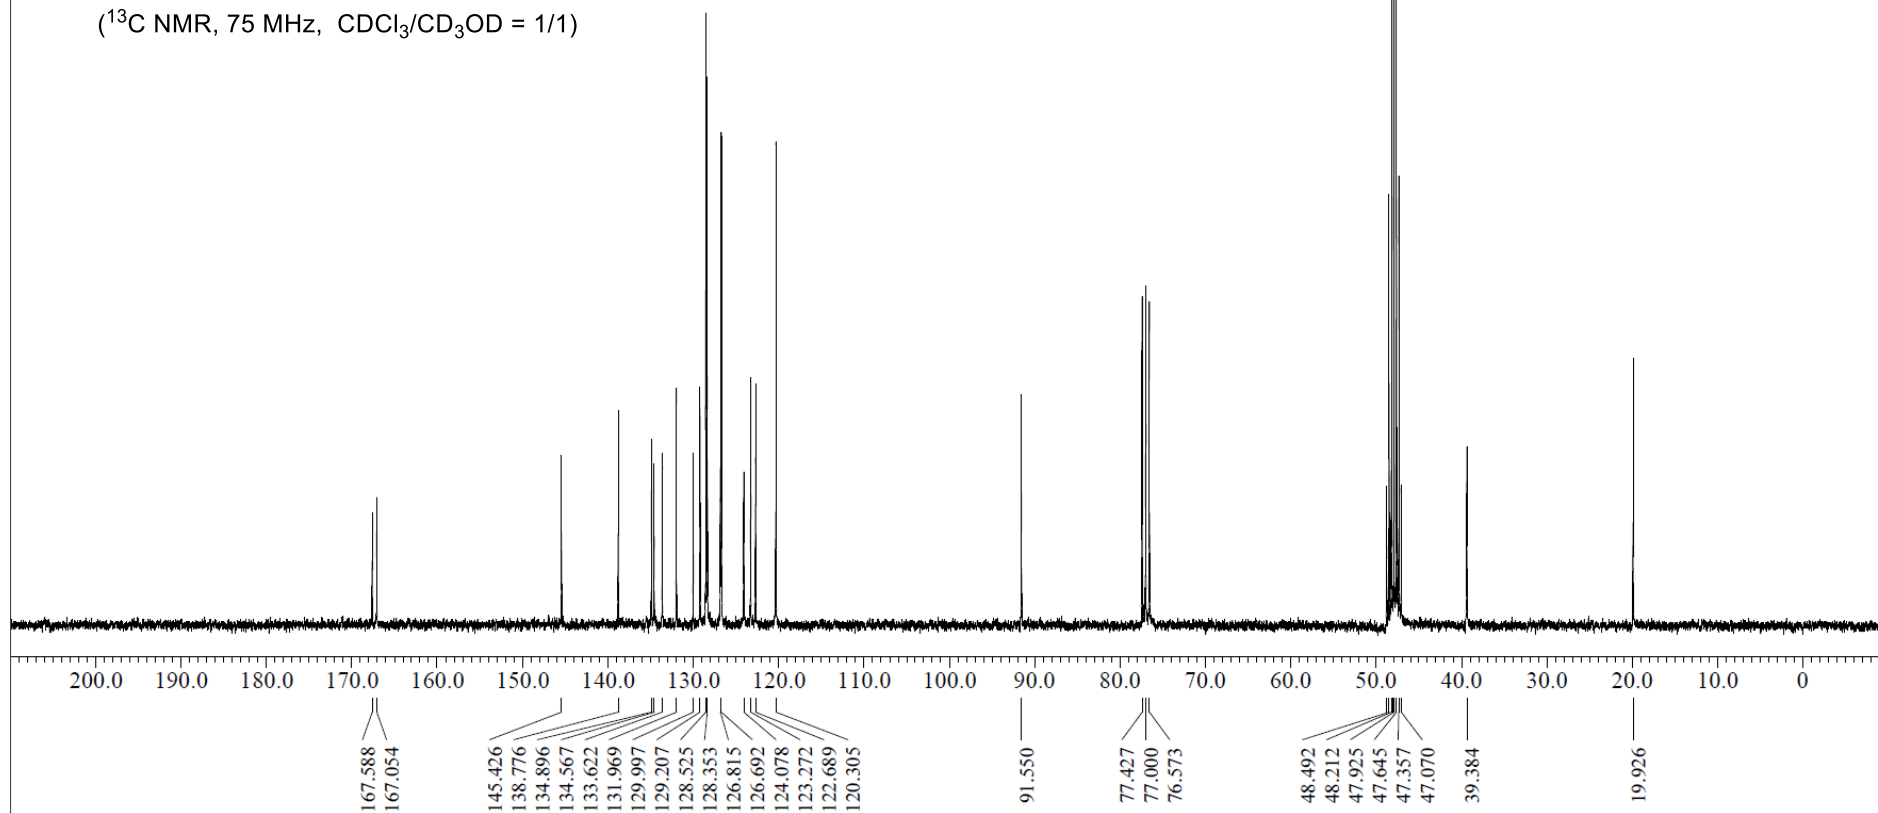

X : parts per Million :  $^{13}\text{C}$

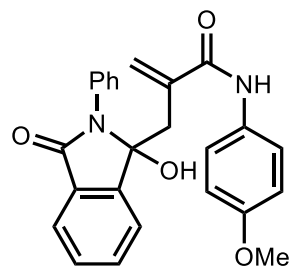

**6f**

( $^1\text{H}$  NMR, 300 MHz,  $\text{CDCl}_3/\text{CD}_3\text{OD} = 1/1$ )

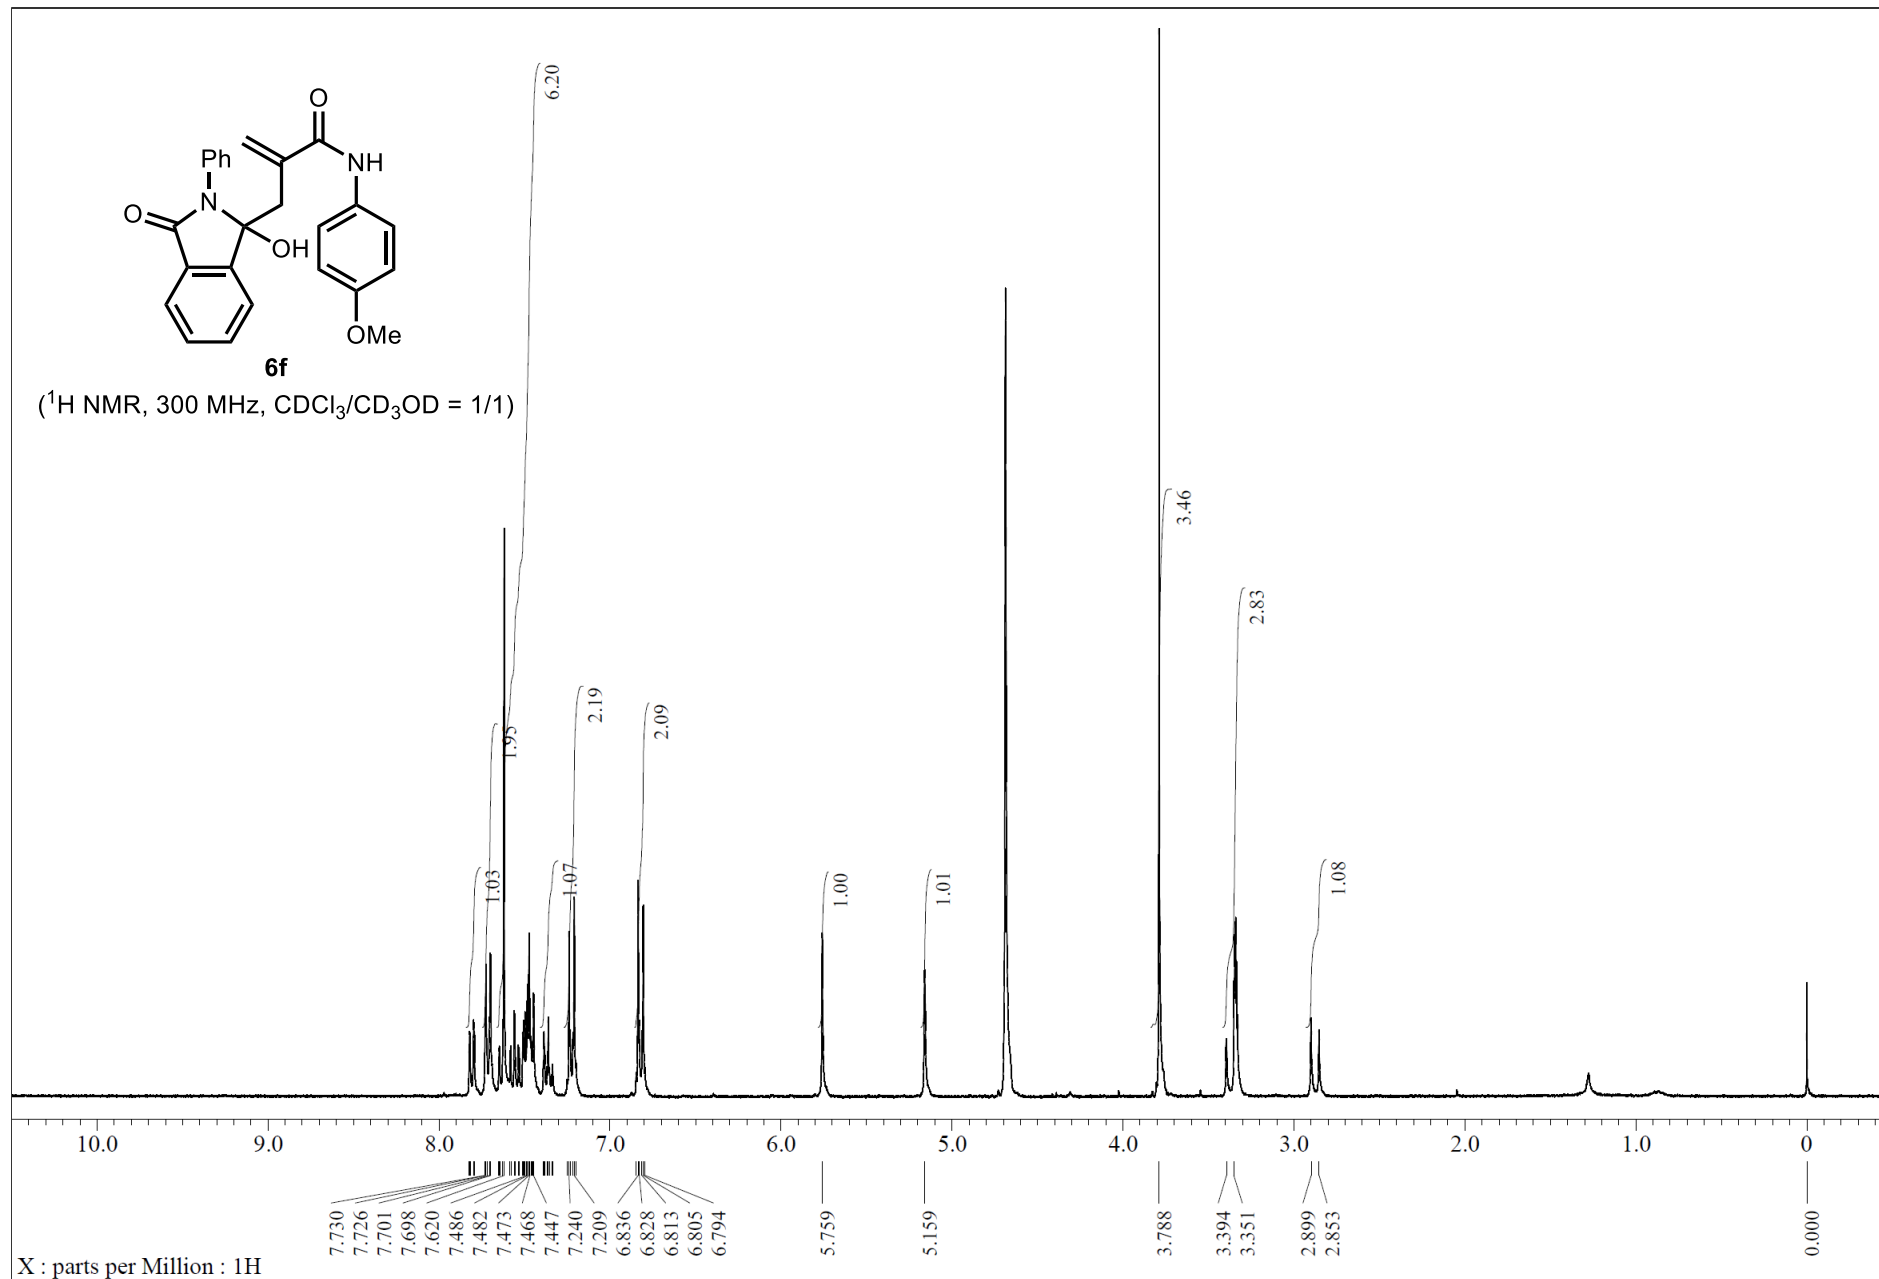

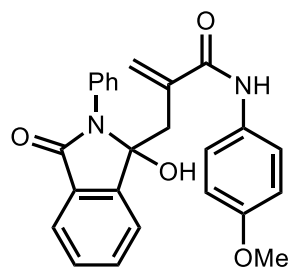

**6f**

( $^{13}\text{C}$  NMR, 75 MHz,  $\text{CDCl}_3/\text{CD}_3\text{OD} = 1/1$ )

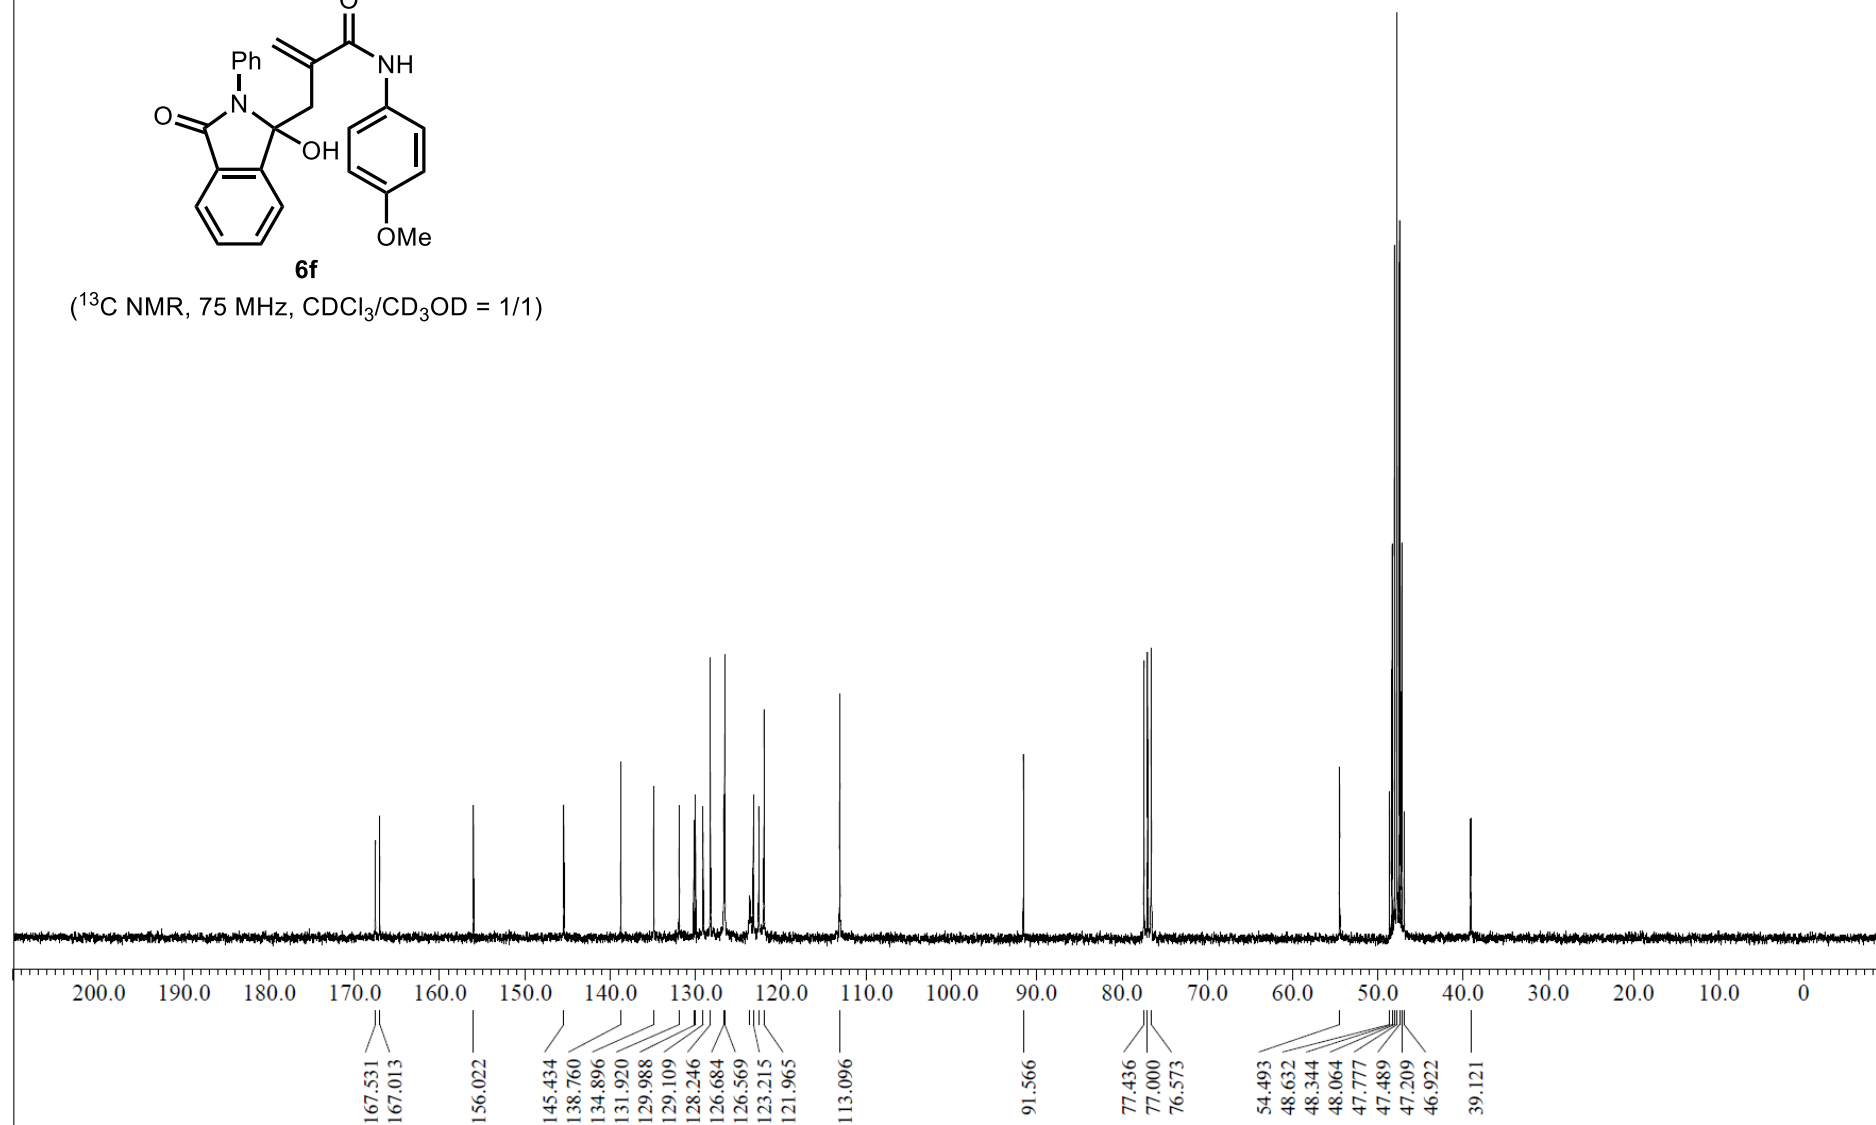

X : parts per Million :  $^{13}\text{C}$



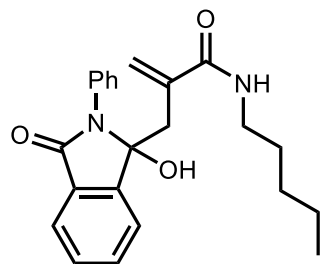

**6g**

( $^1\text{H}$  NMR, 300 MHz,  $\text{CDCl}_3/\text{CD}_3\text{OD} = 1/1$ )

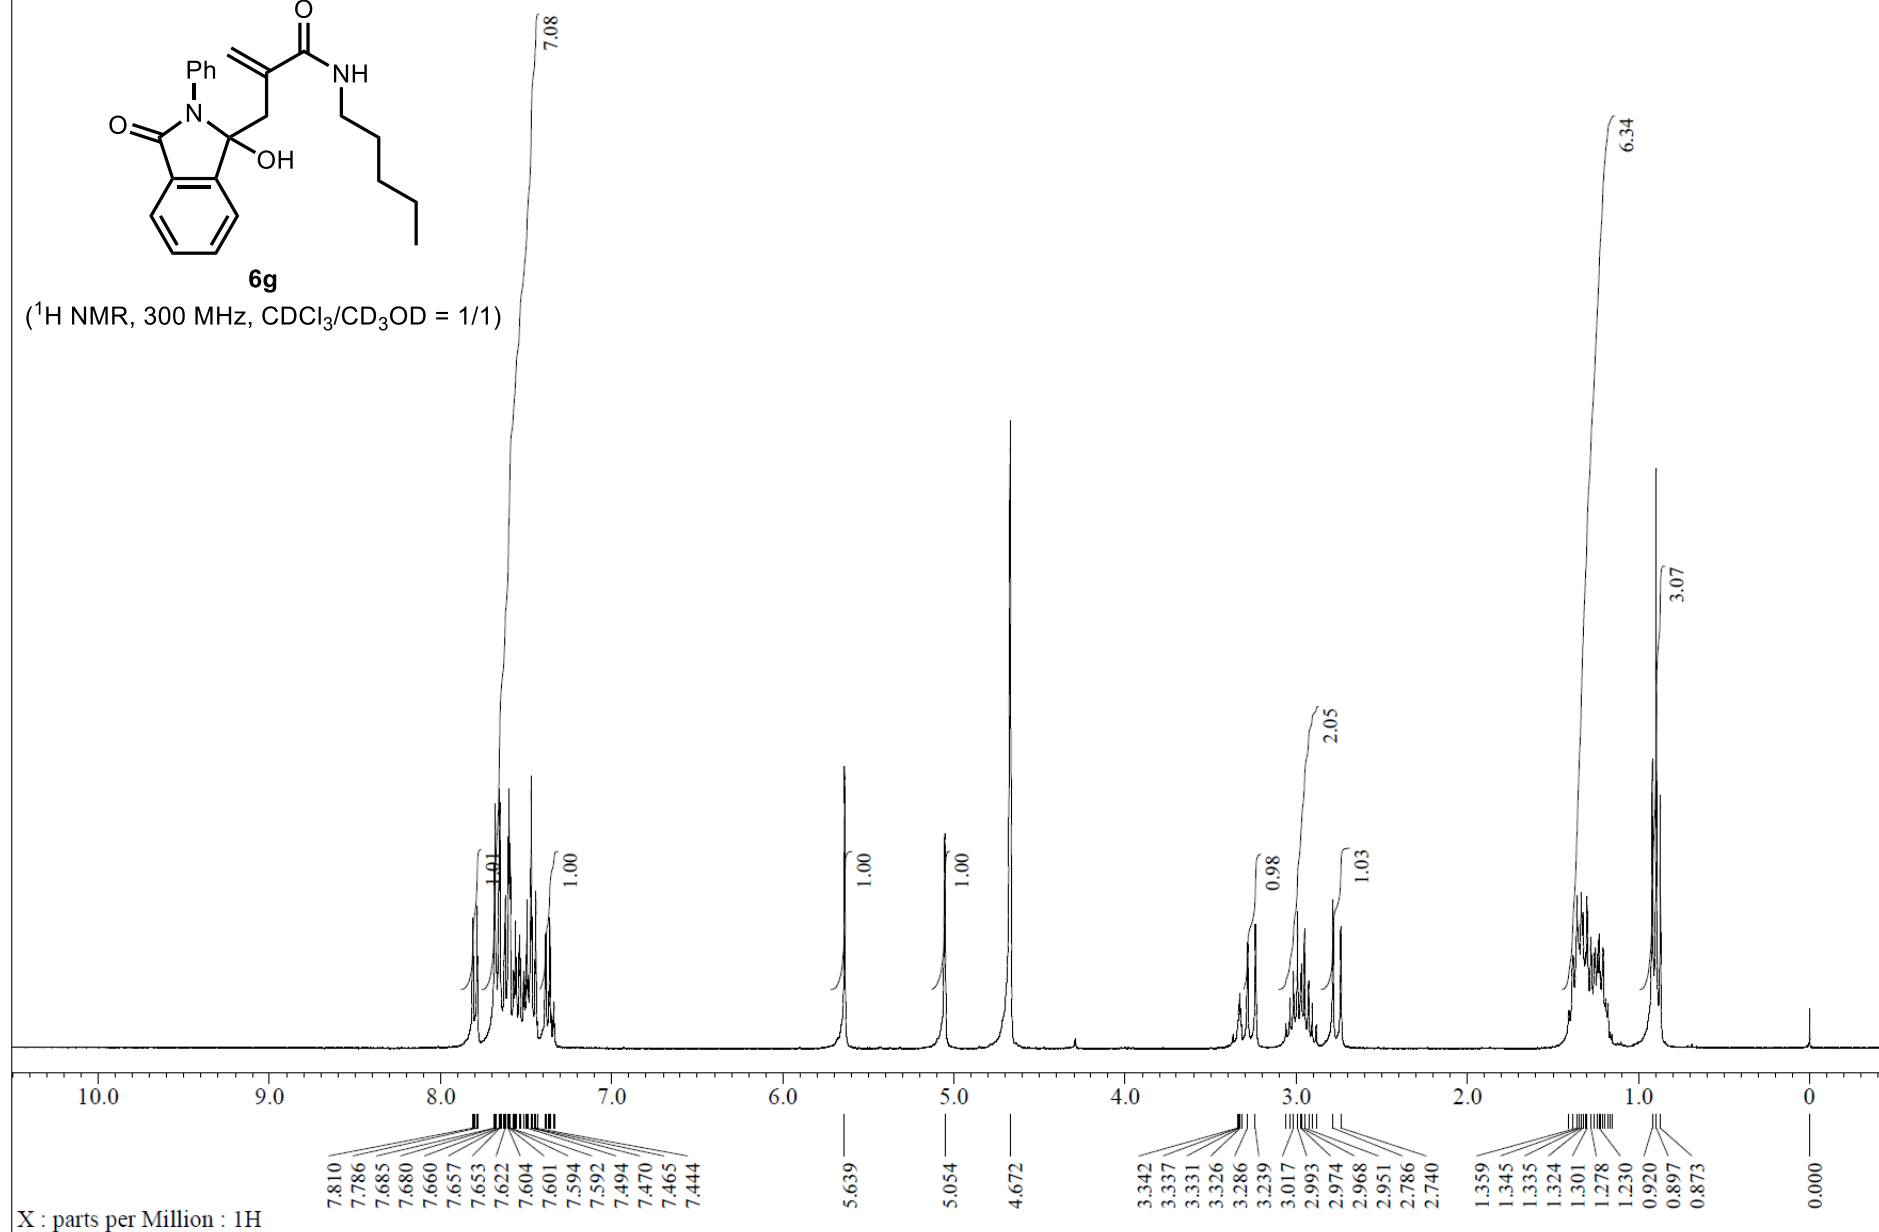

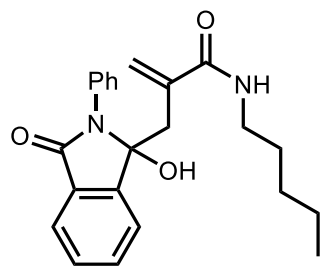

**6g**

( $^{13}\text{C}$  NMR, 75 MHz,  $\text{CDCl}_3/\text{CD}_3\text{OD} = 1/1$ )

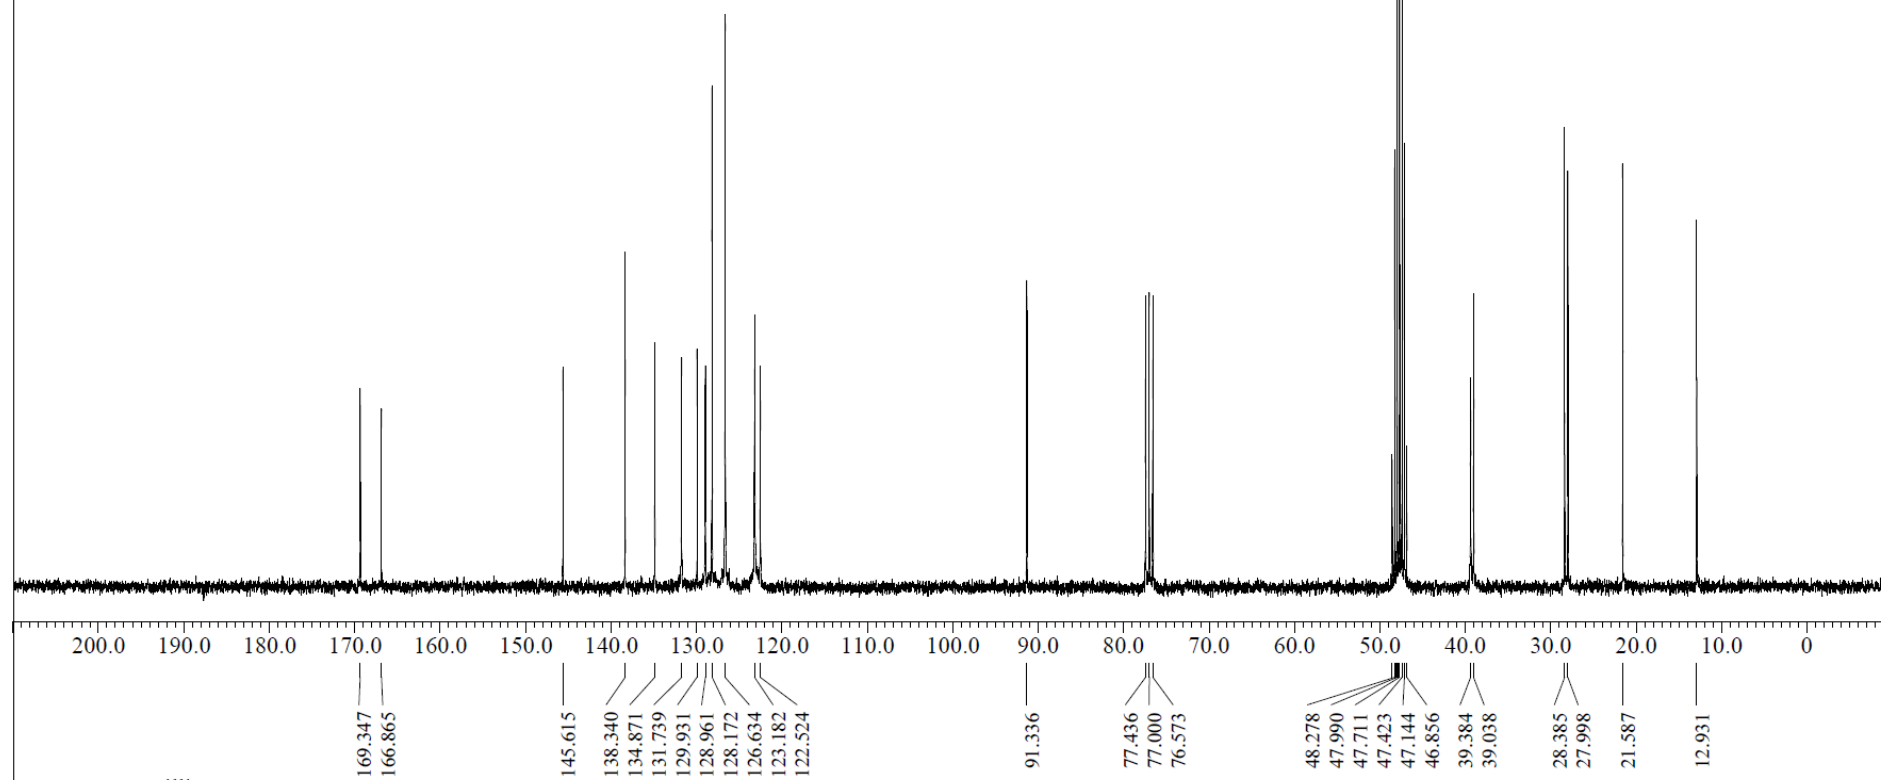

X : parts per Million :  $^{13}\text{C}$

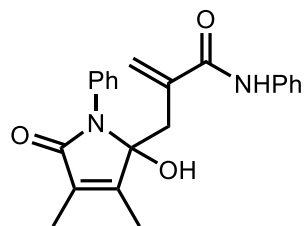

**6h**

( $^1\text{H}$  NMR, 300 MHz,  $\text{CDCl}_3/\text{CD}_3\text{OD} = 1/1$ )

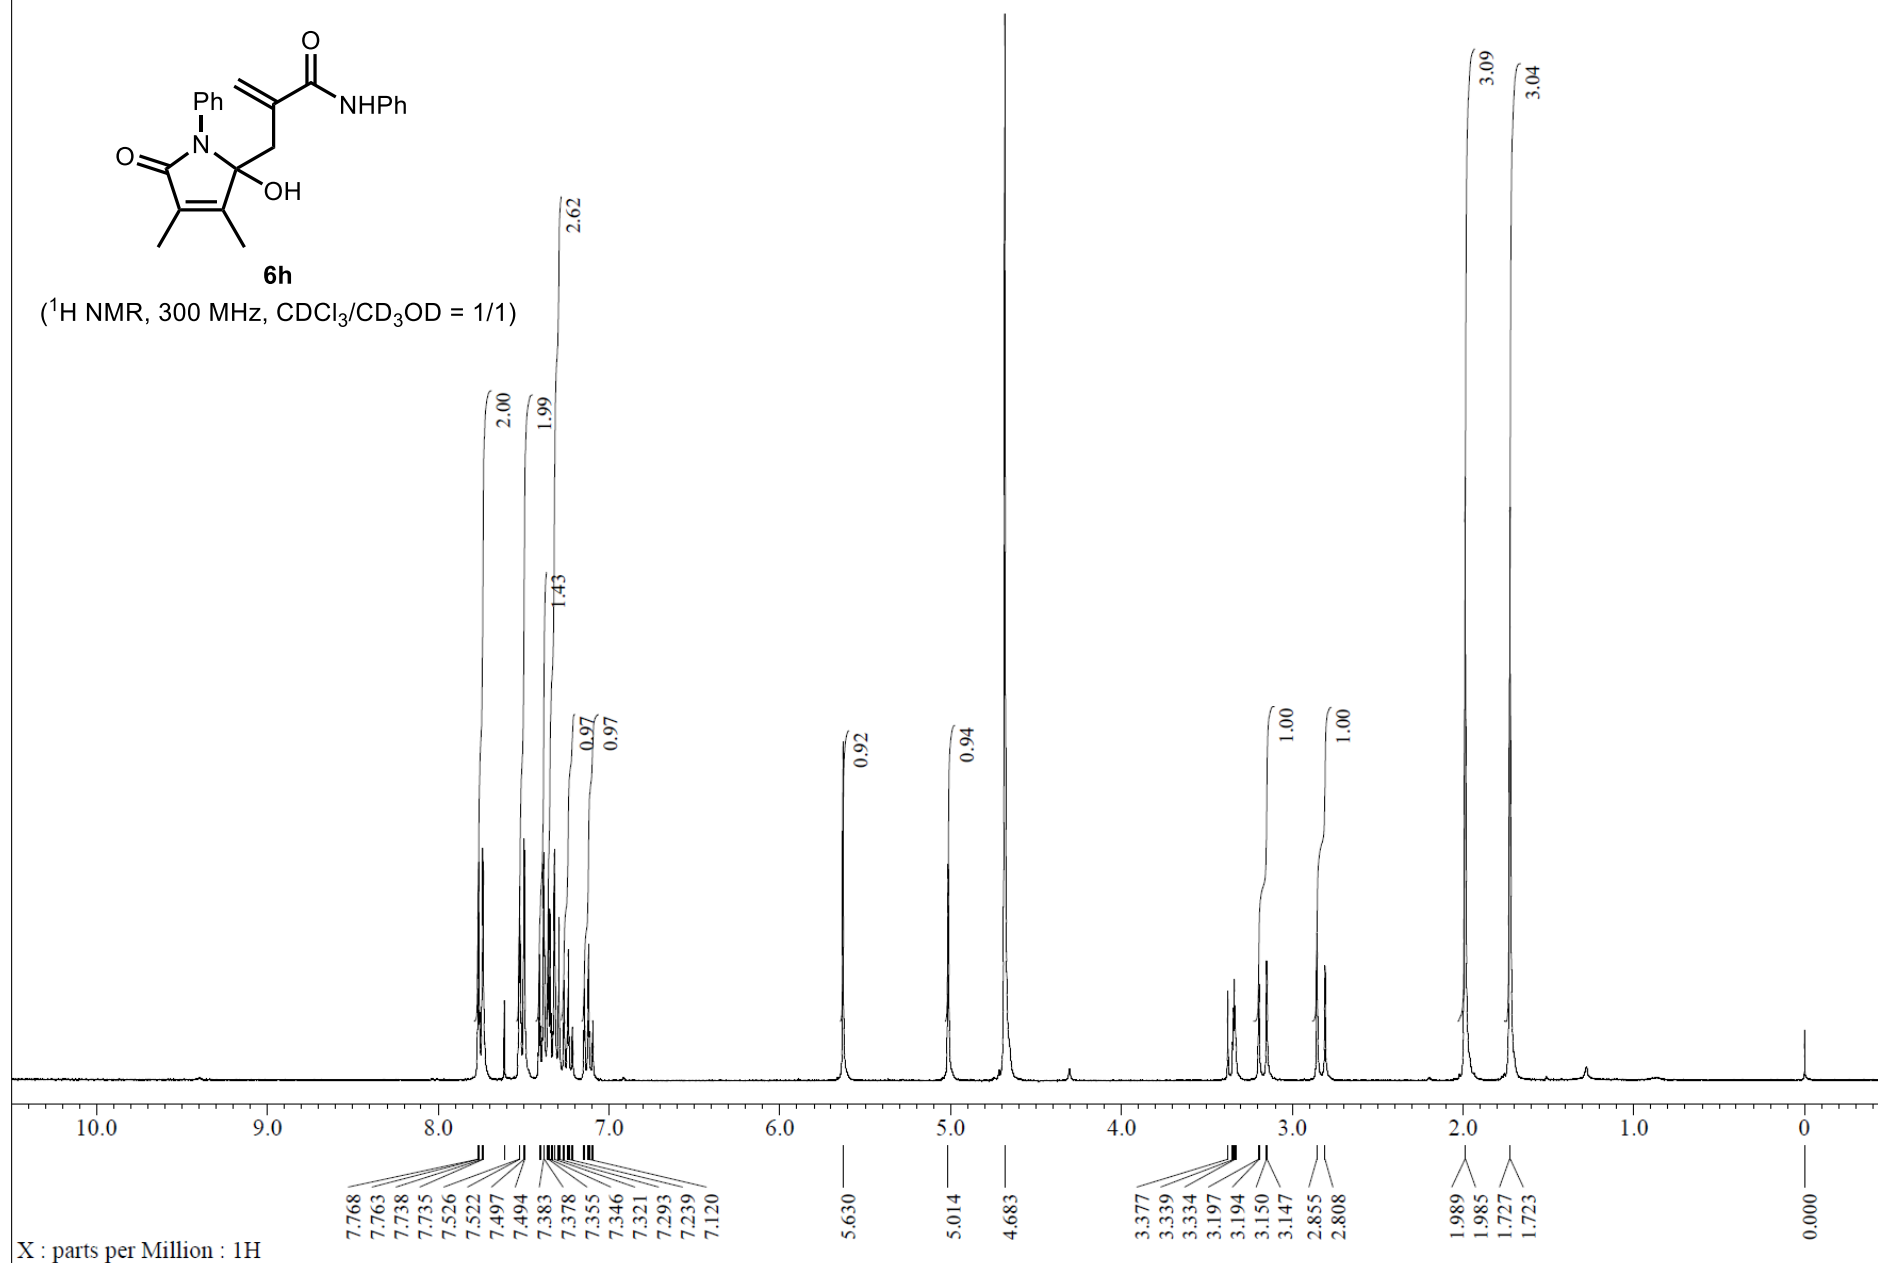

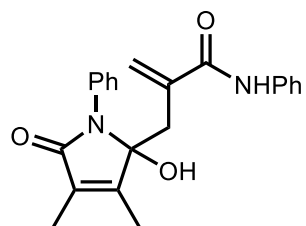

**6h**

( $^{13}\text{C}$  NMR, 75 MHz,  $\text{CDCl}_3/\text{CD}_3\text{OD} = 1/1$ )

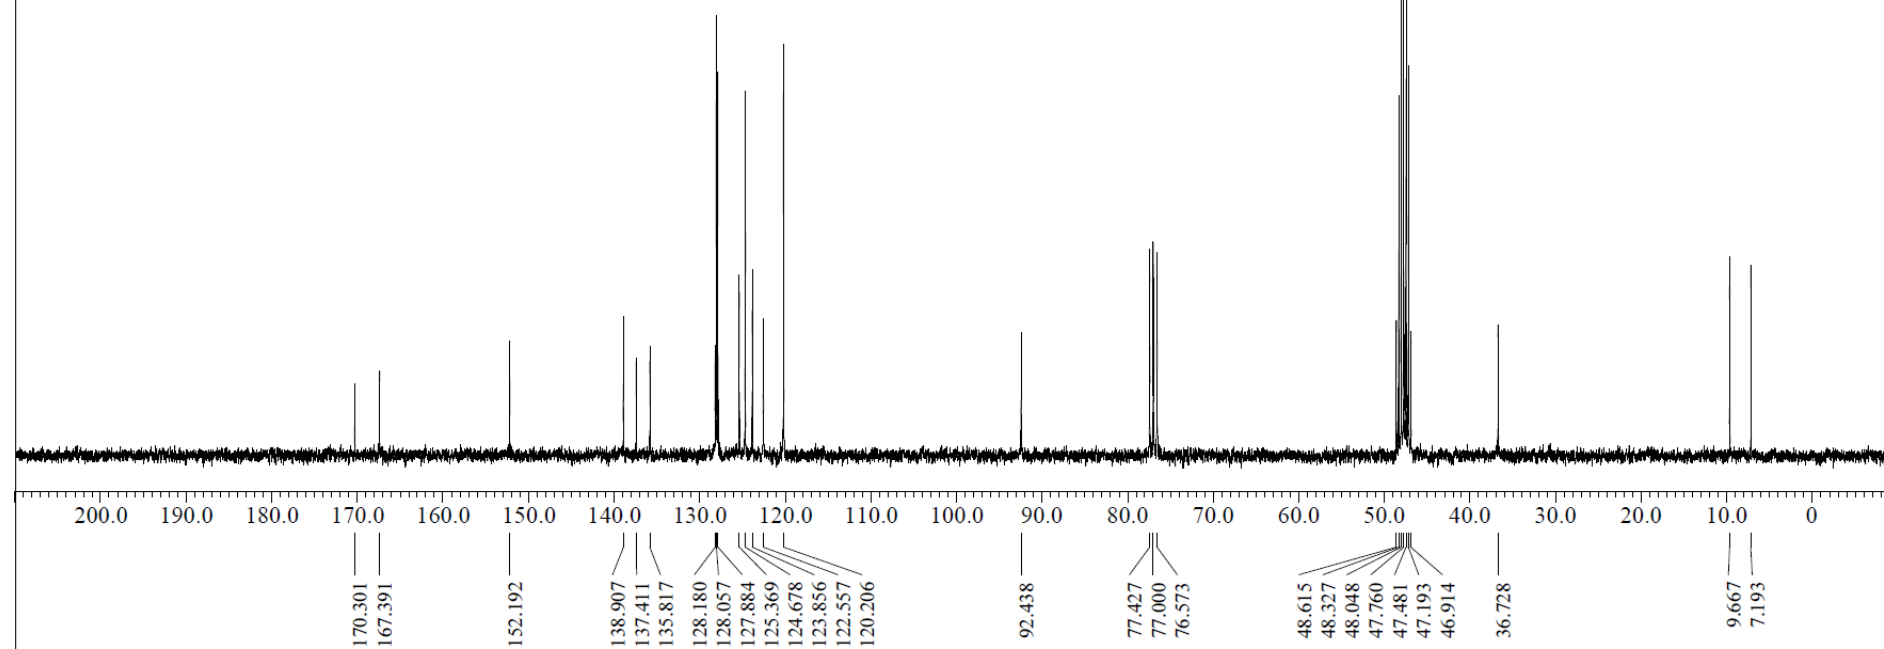

X : parts per Million :  $^{13}\text{C}$

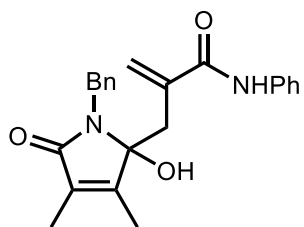

**6i**

( $^1\text{H}$  NMR, 300 MHz,  $\text{CDCl}_3/\text{CD}_3\text{OD} = 1/1$ )

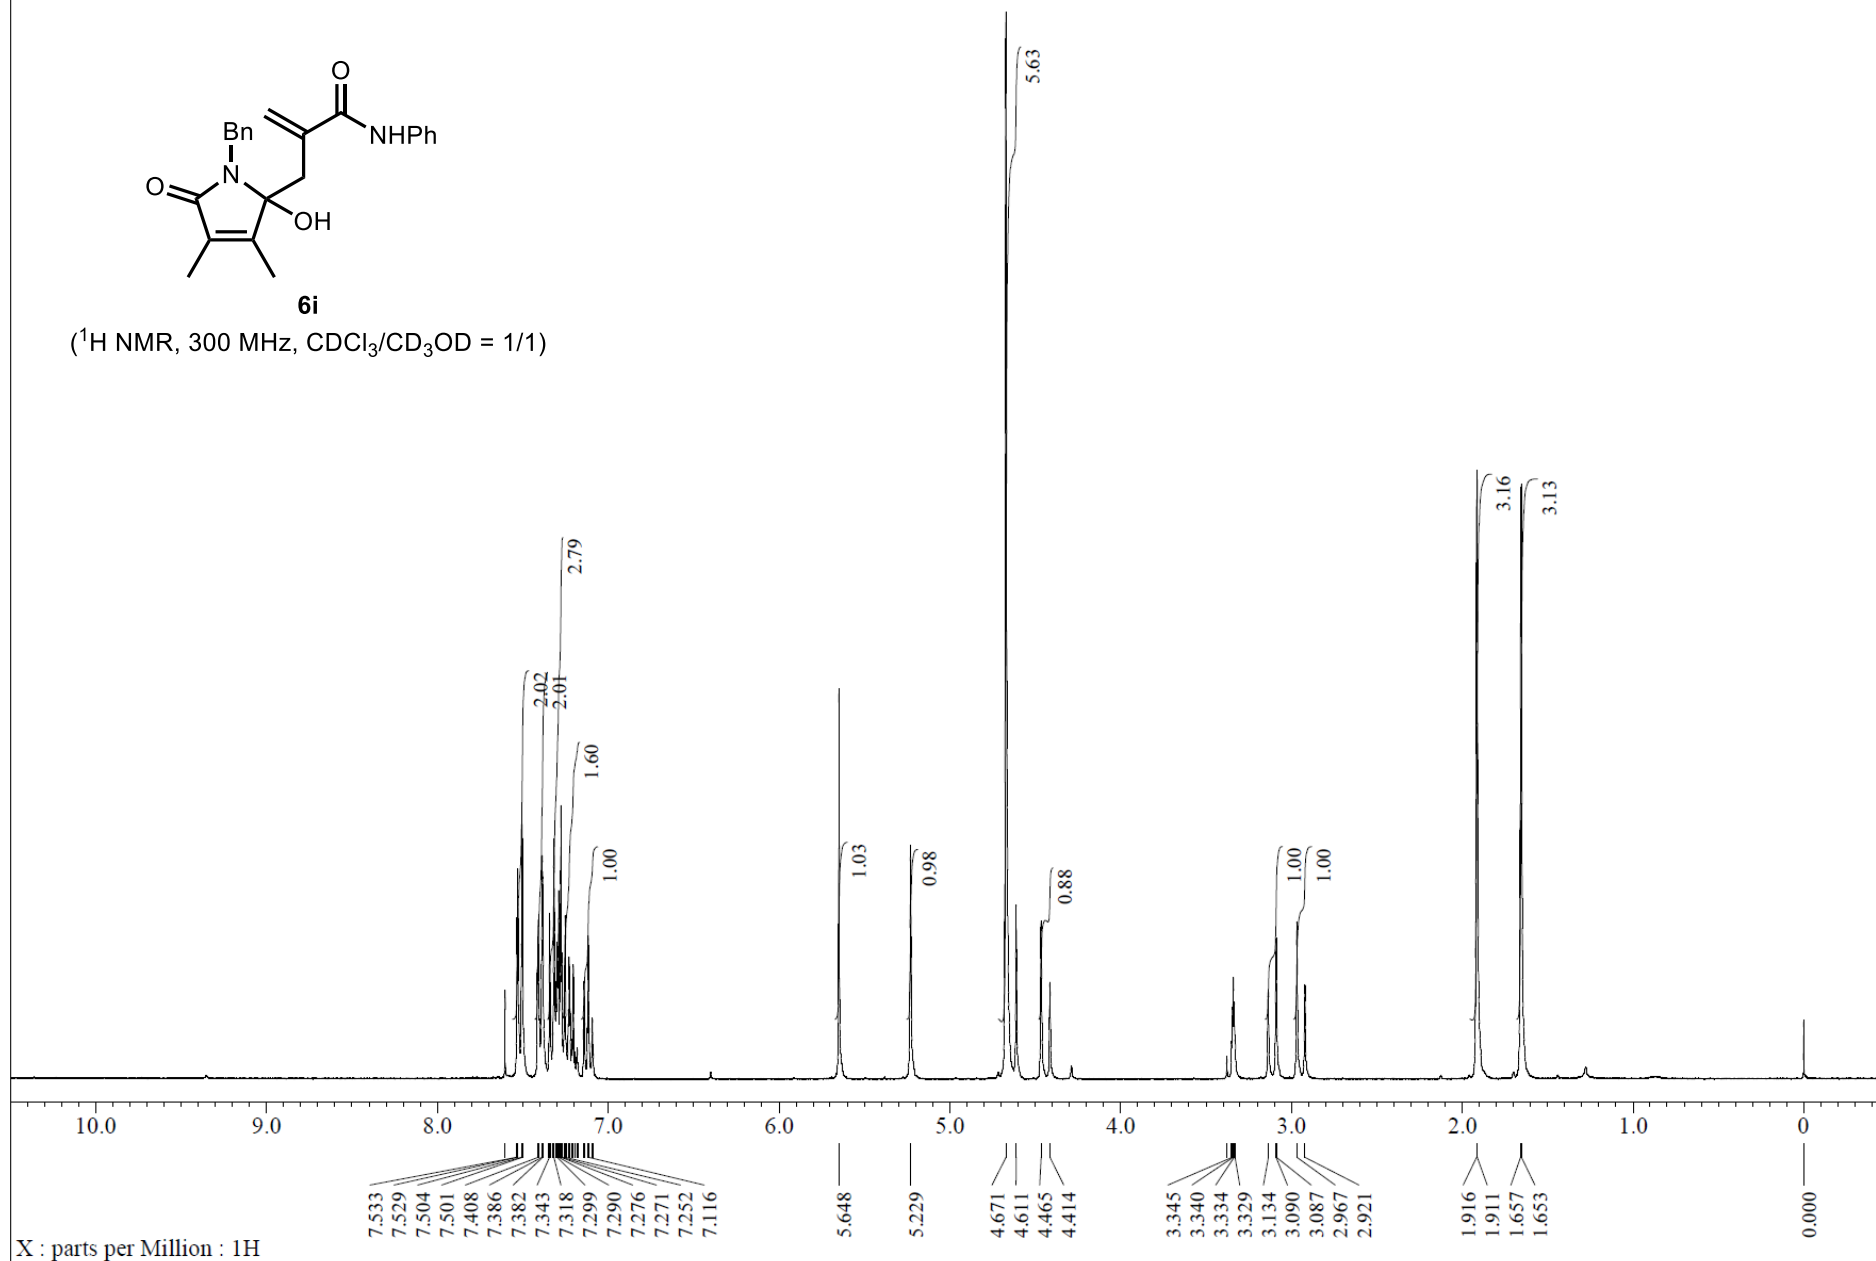

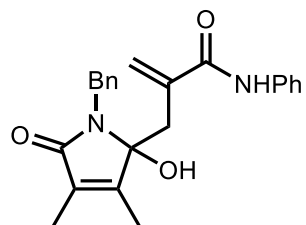

**6i**

( $^{13}\text{C}$  NMR, 75 MHz,  $\text{CDCl}_3/\text{CD}_3\text{OD} = 1/1$ )

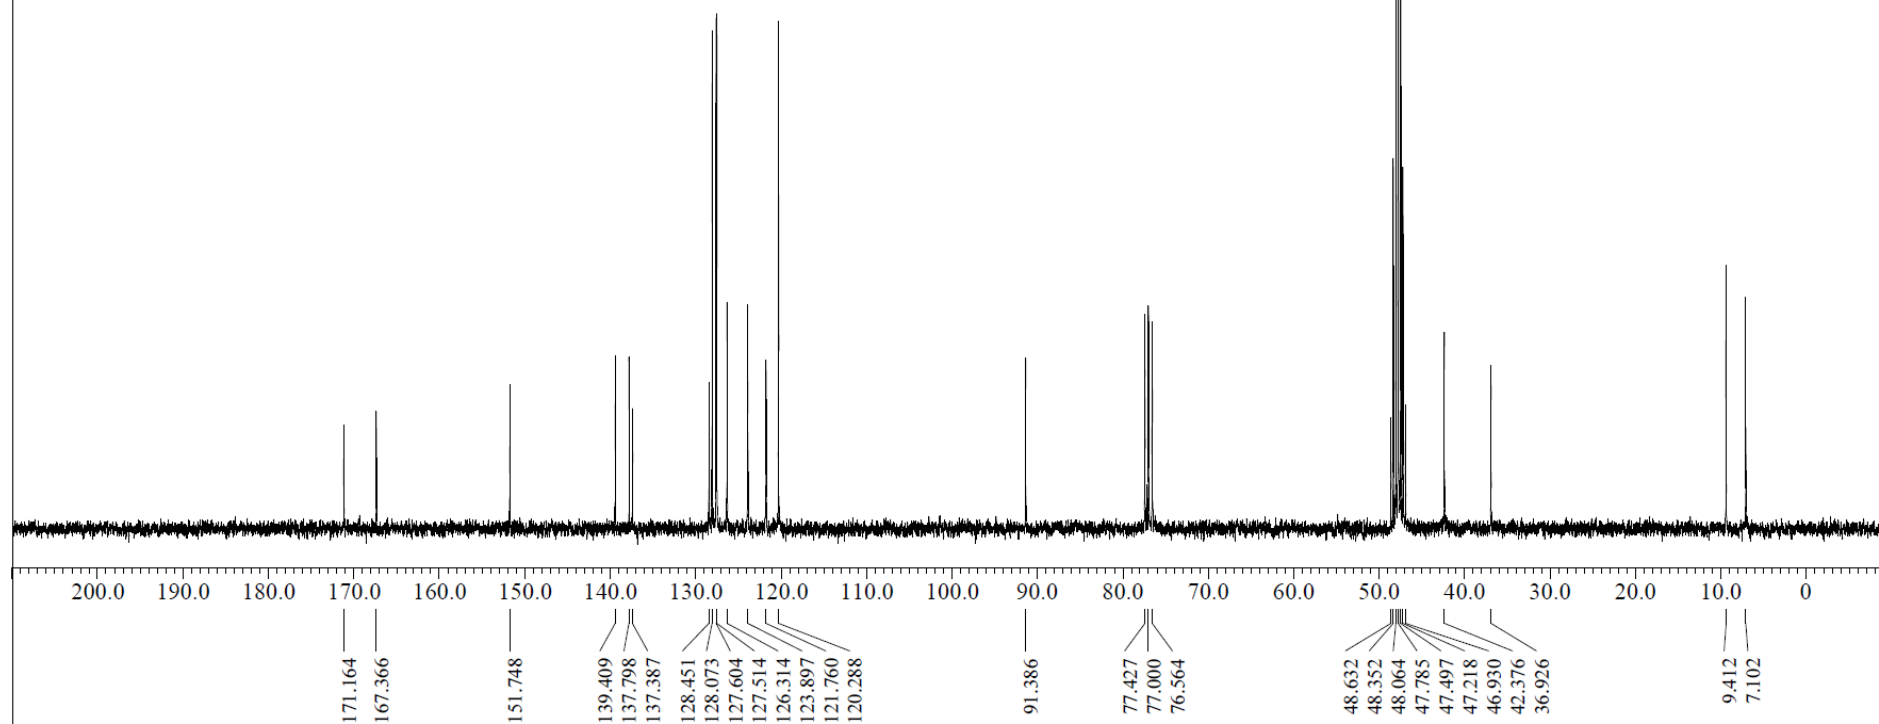

X : parts per Million :  $^{13}\text{C}$

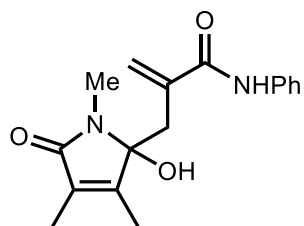

**6j**

( $^1\text{H}$  NMR, 300 MHz,  $\text{CDCl}_3/\text{CD}_3\text{OD} = 1/1$ )

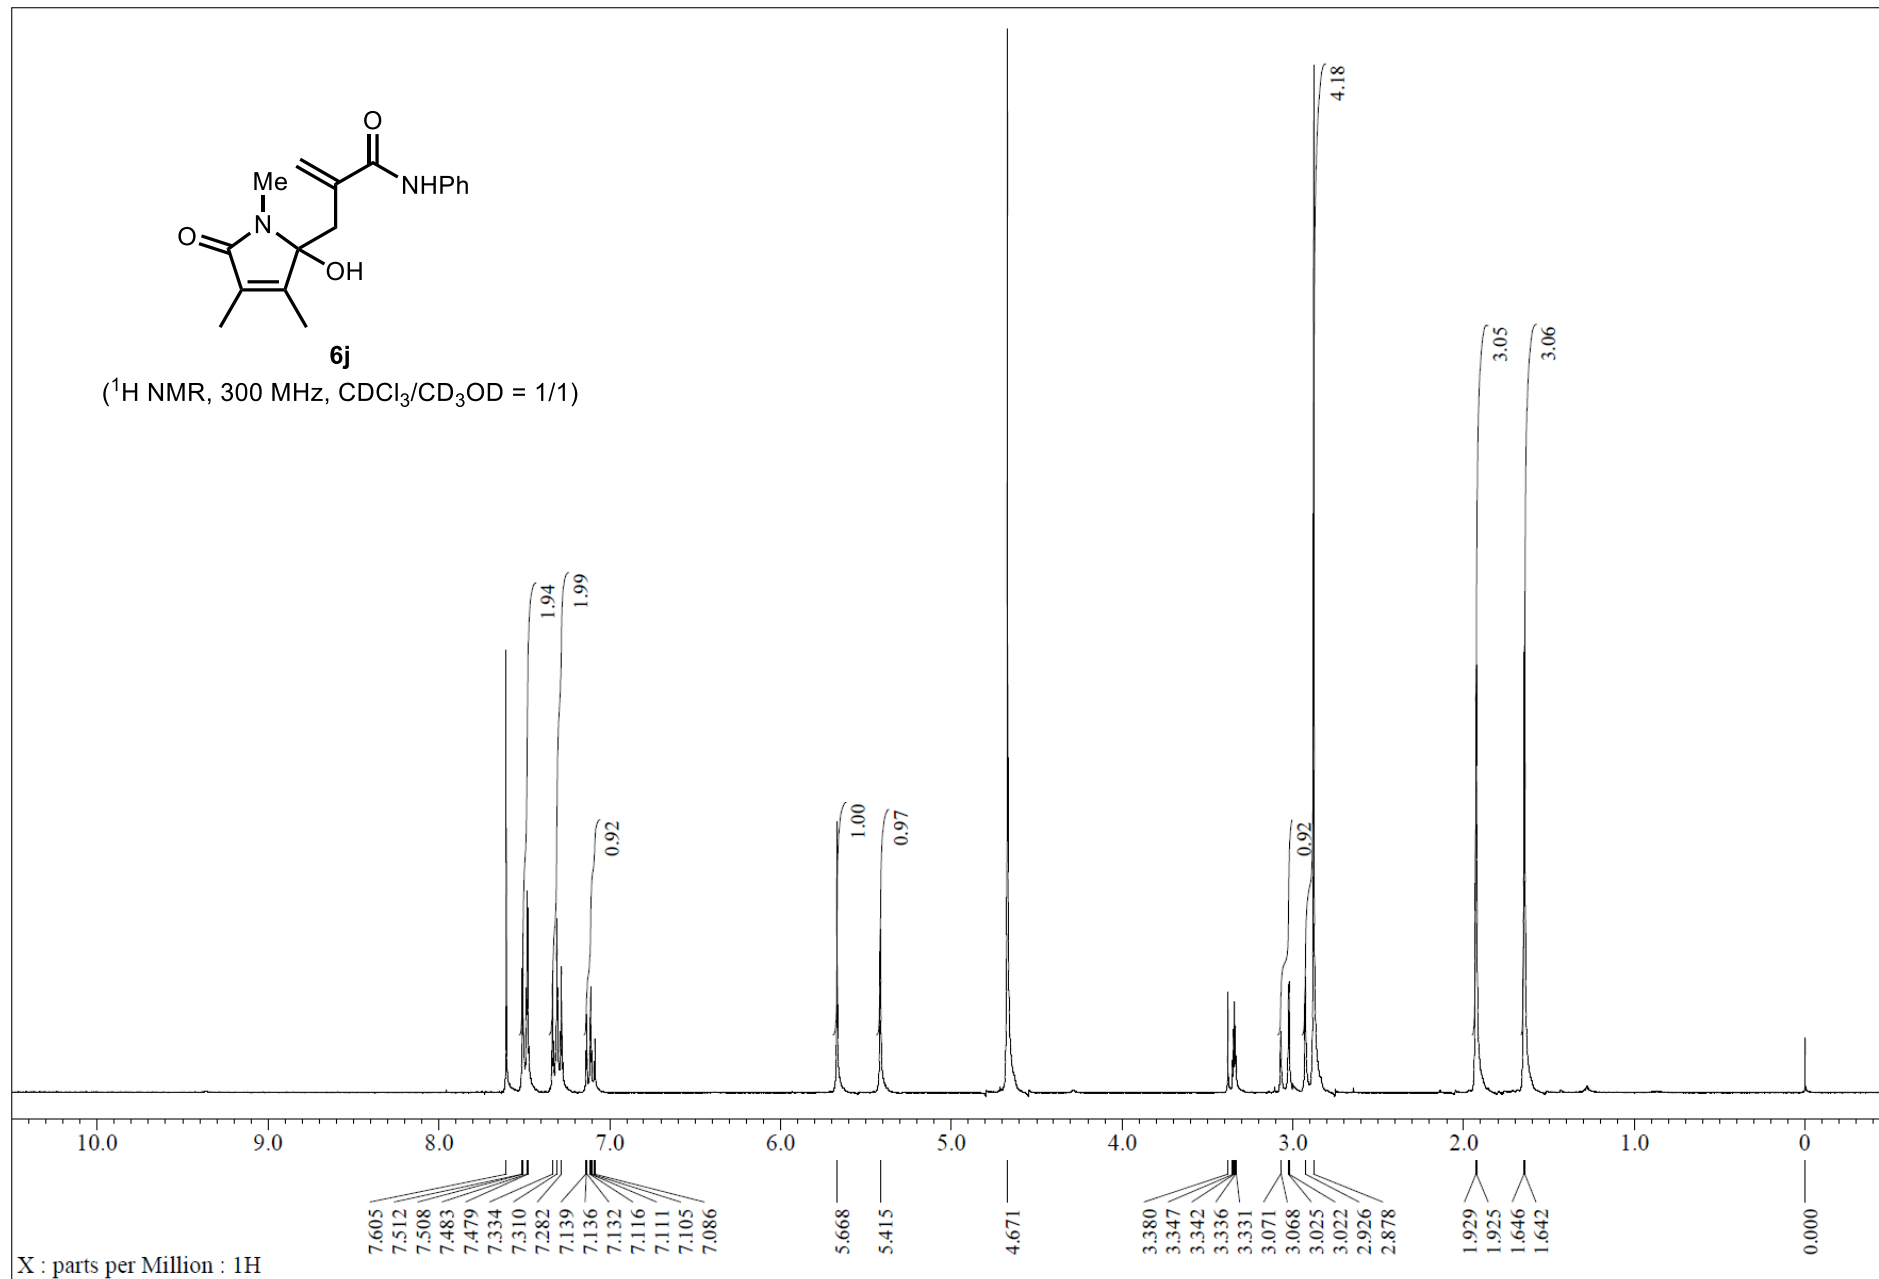

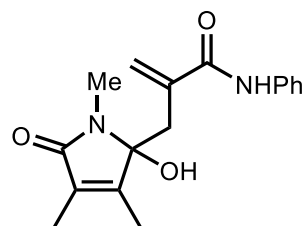

**6j**

( $^{13}\text{C}$  NMR, 75 MHz,  $\text{CDCl}_3/\text{CD}_3\text{OD} = 1/1$ )

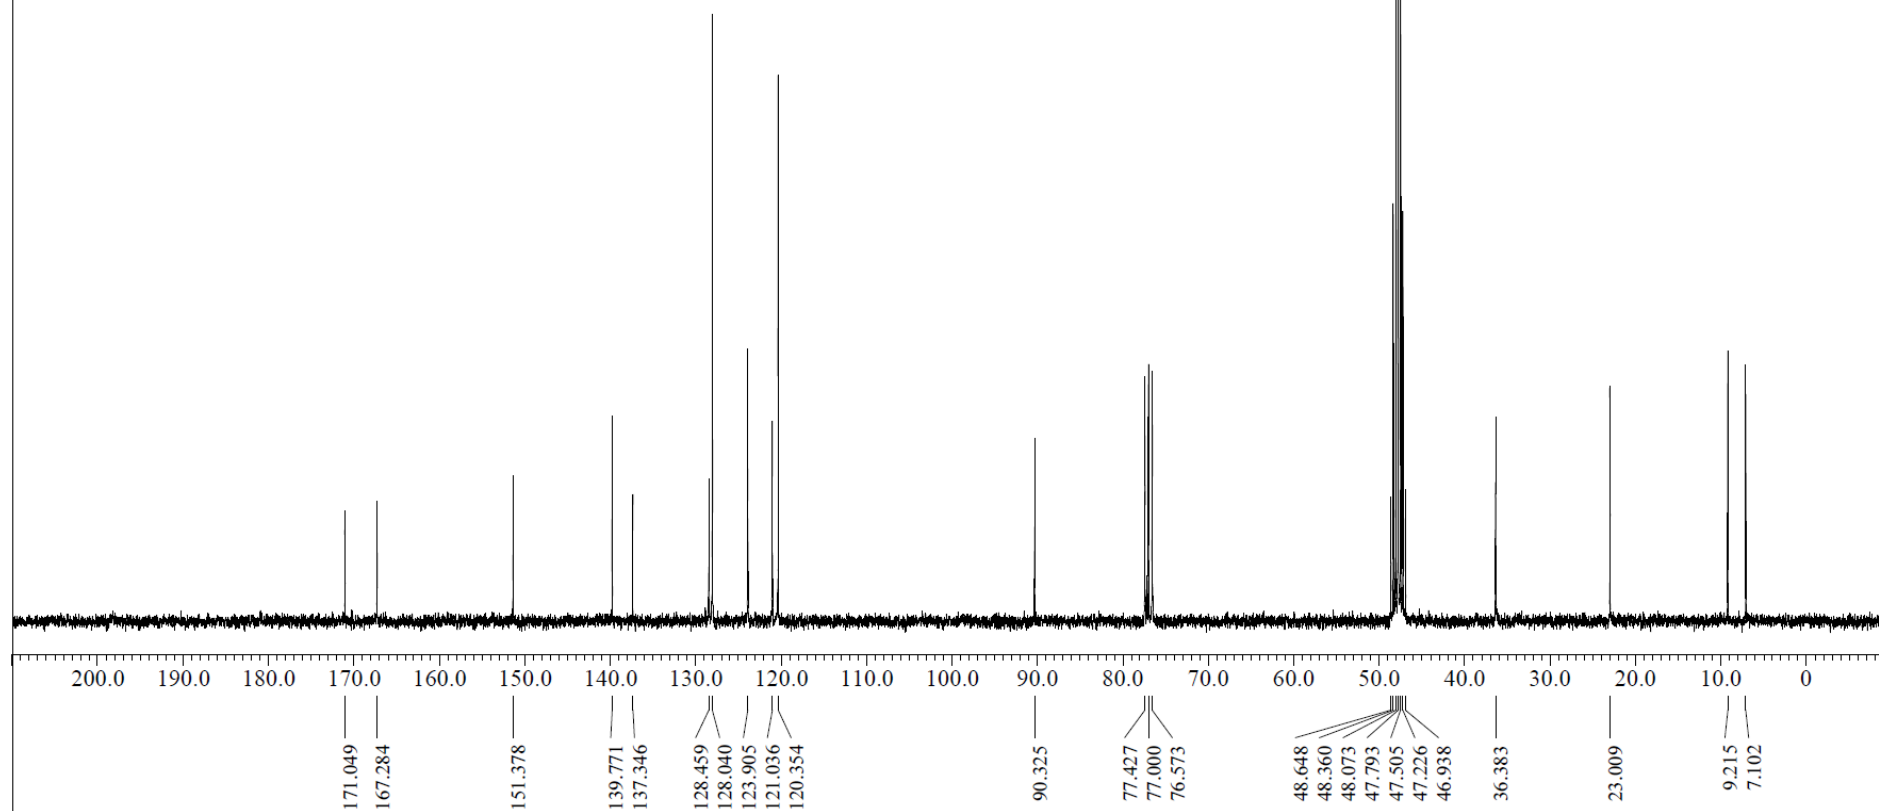

X : parts per Million :  $^{13}\text{C}$



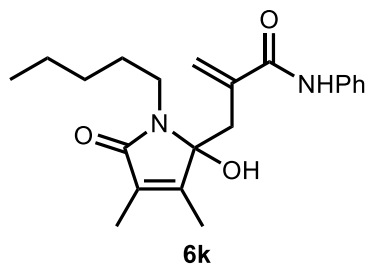

( $^1\text{H}$  NMR, 300 MHz,  $\text{CDCl}_3/\text{CD}_3\text{OD} = 1/1$ )

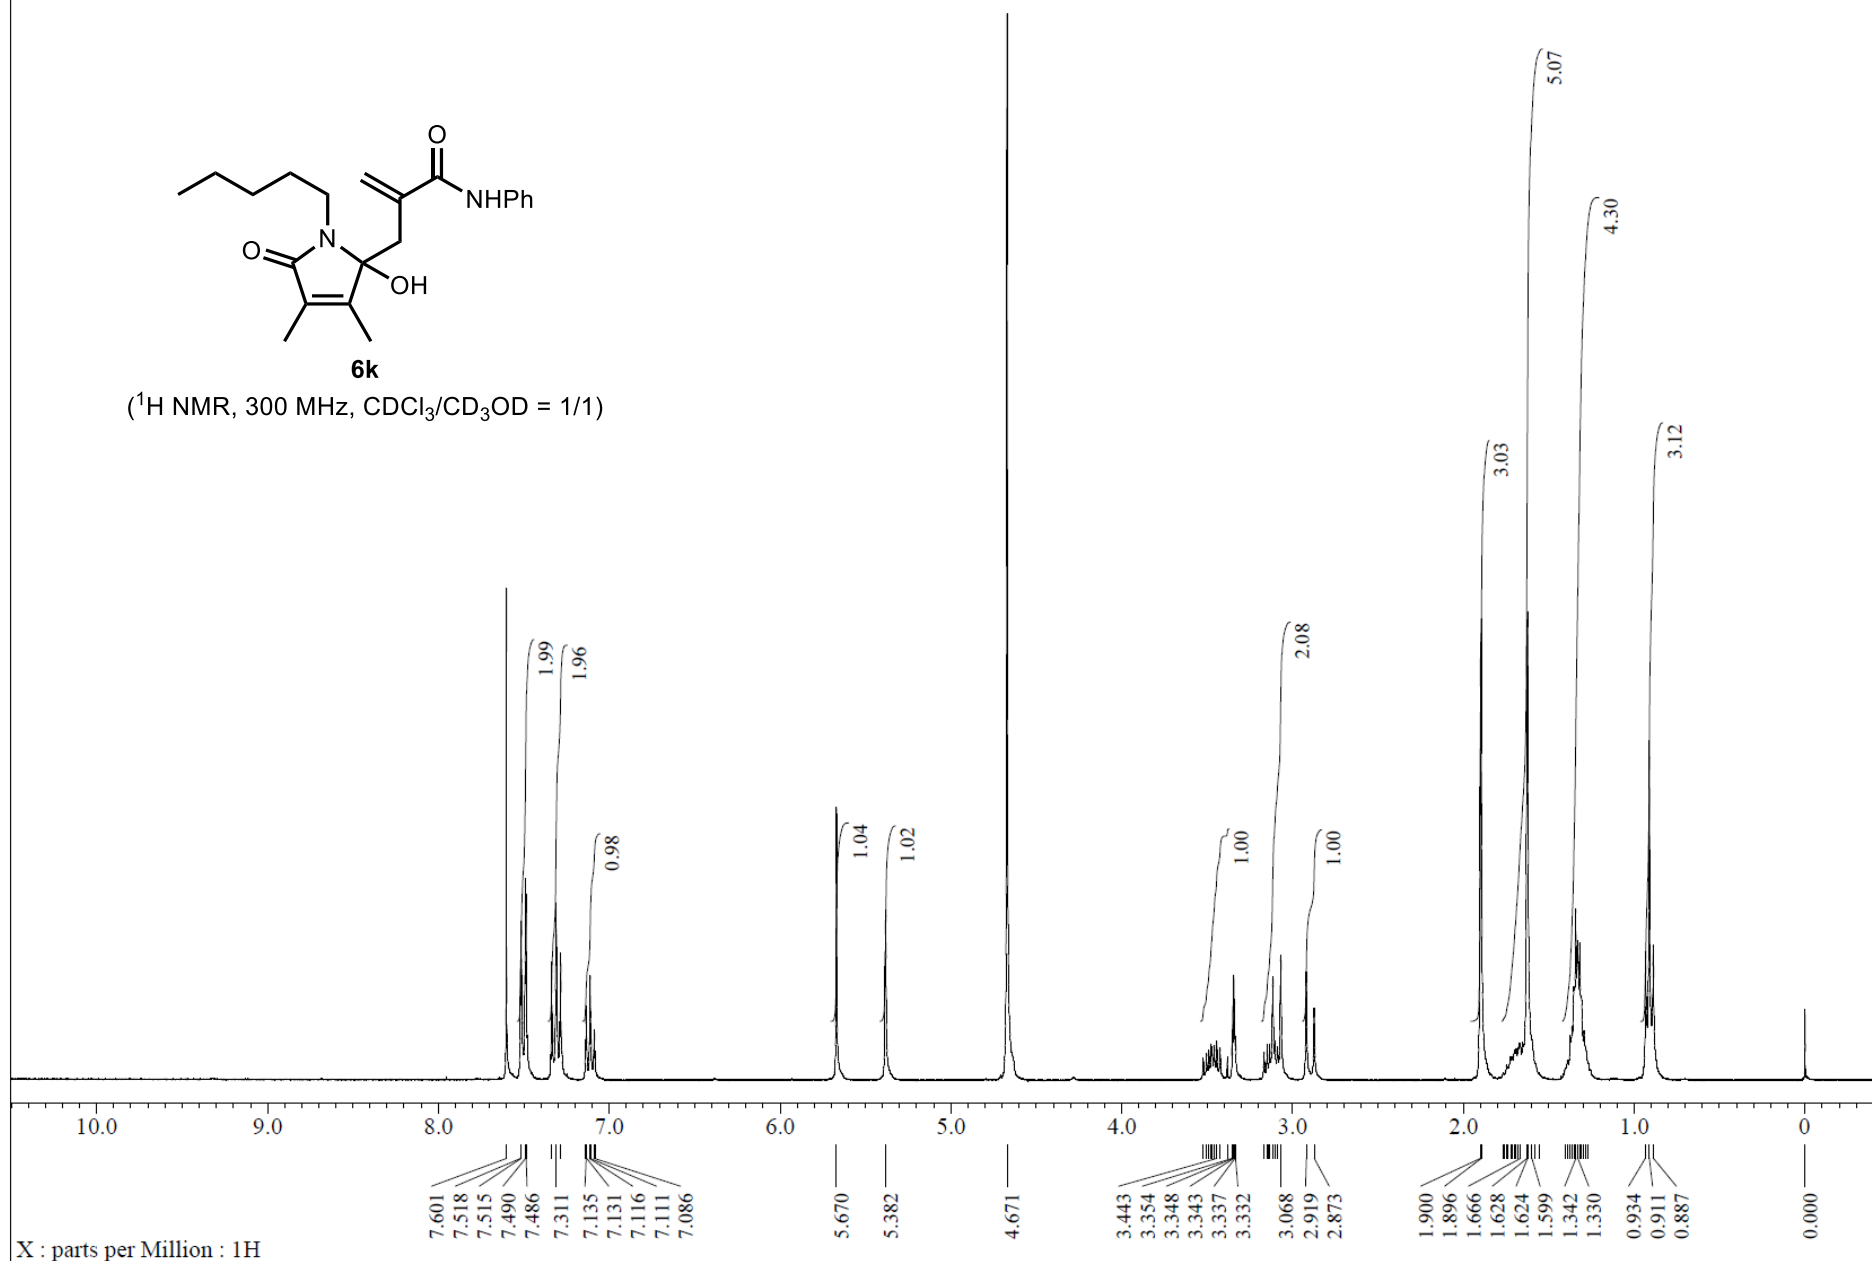

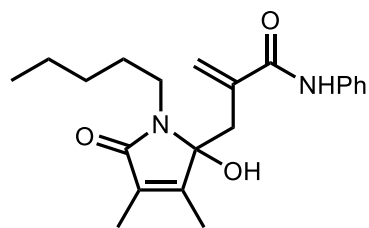

**6k**

( $^{13}\text{C}$  NMR, 75 MHz,  $\text{CDCl}_3/\text{CD}_3\text{OD} = 1/1$ )

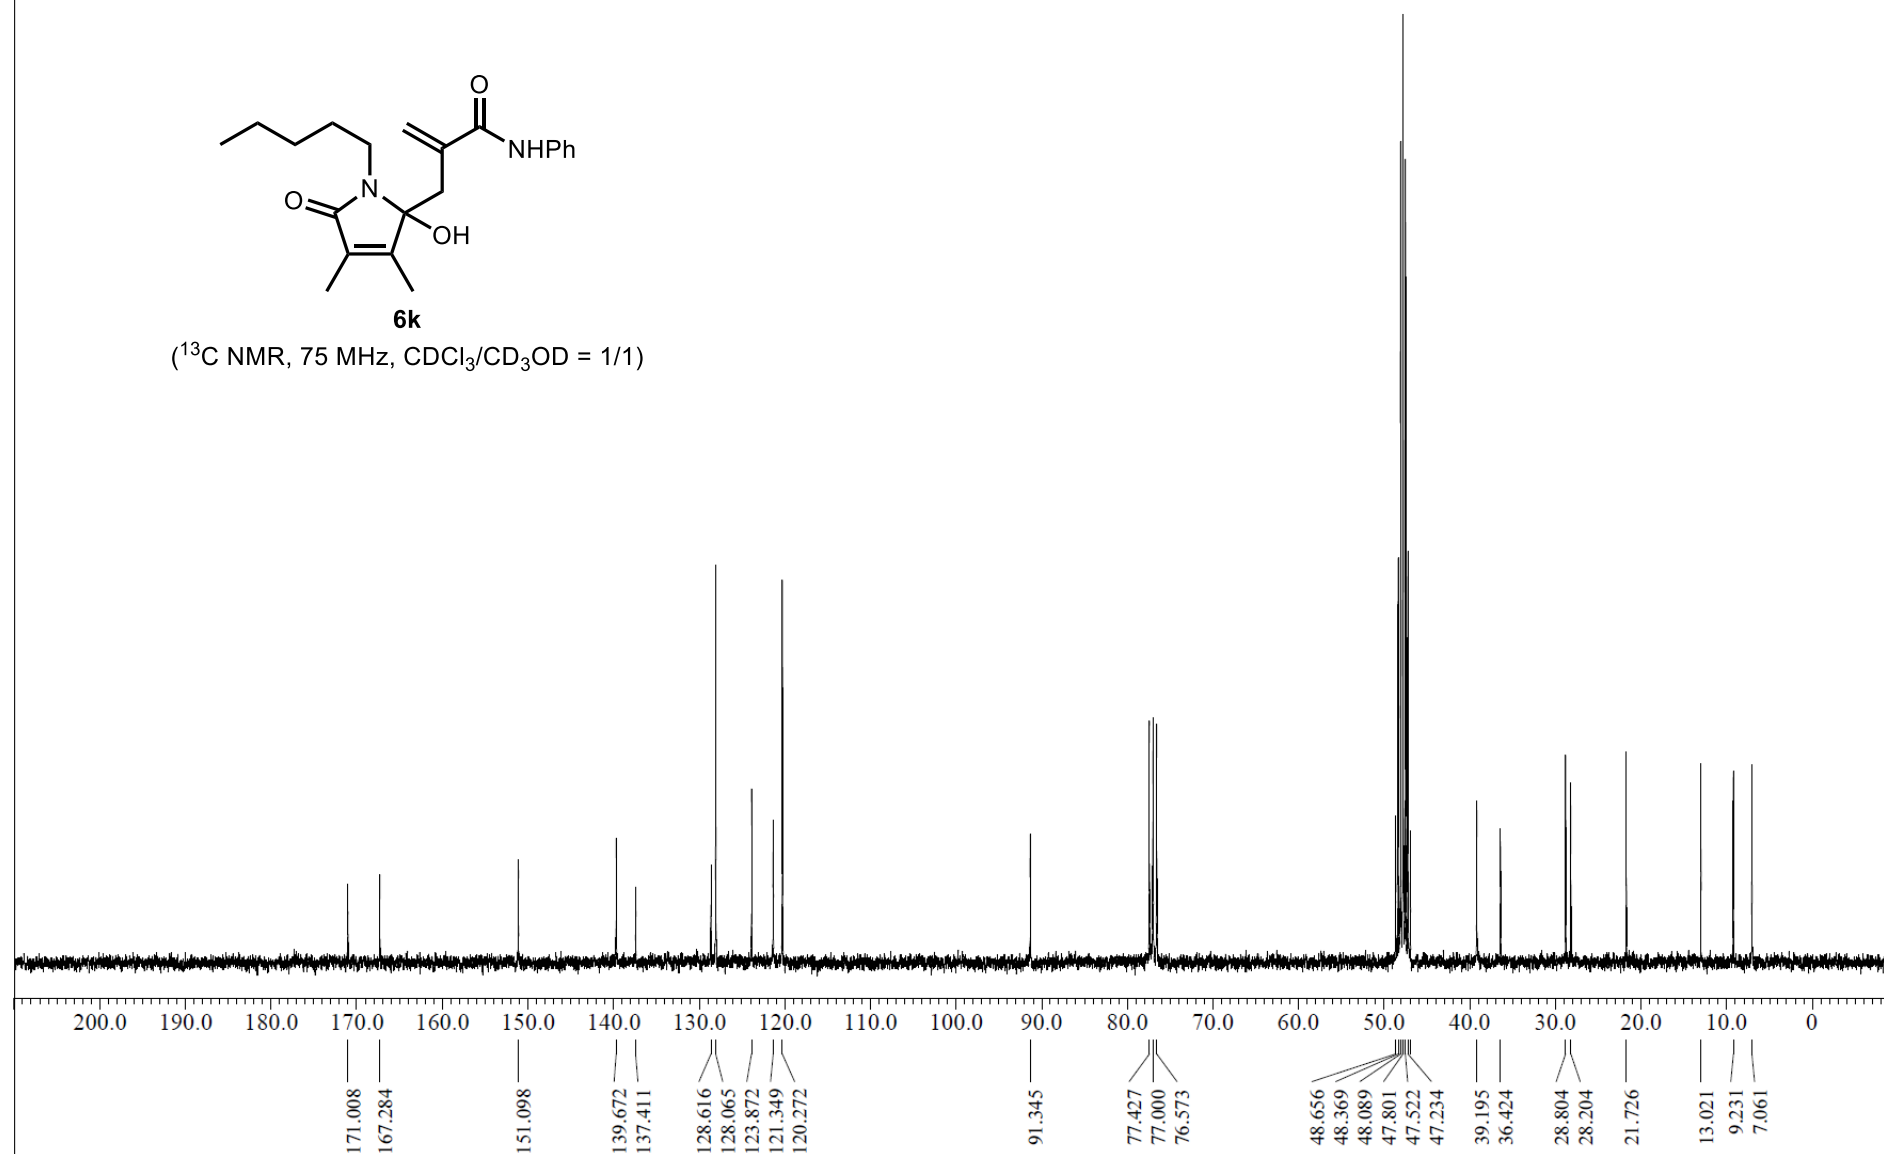

X : parts per Million :  $^{13}\text{C}$

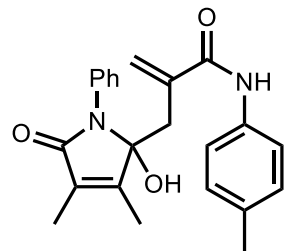

**6l**

( $^1\text{H}$  NMR, 300 MHz,  $\text{CDCl}_3/\text{CD}_3\text{OD} = 1/1$ )

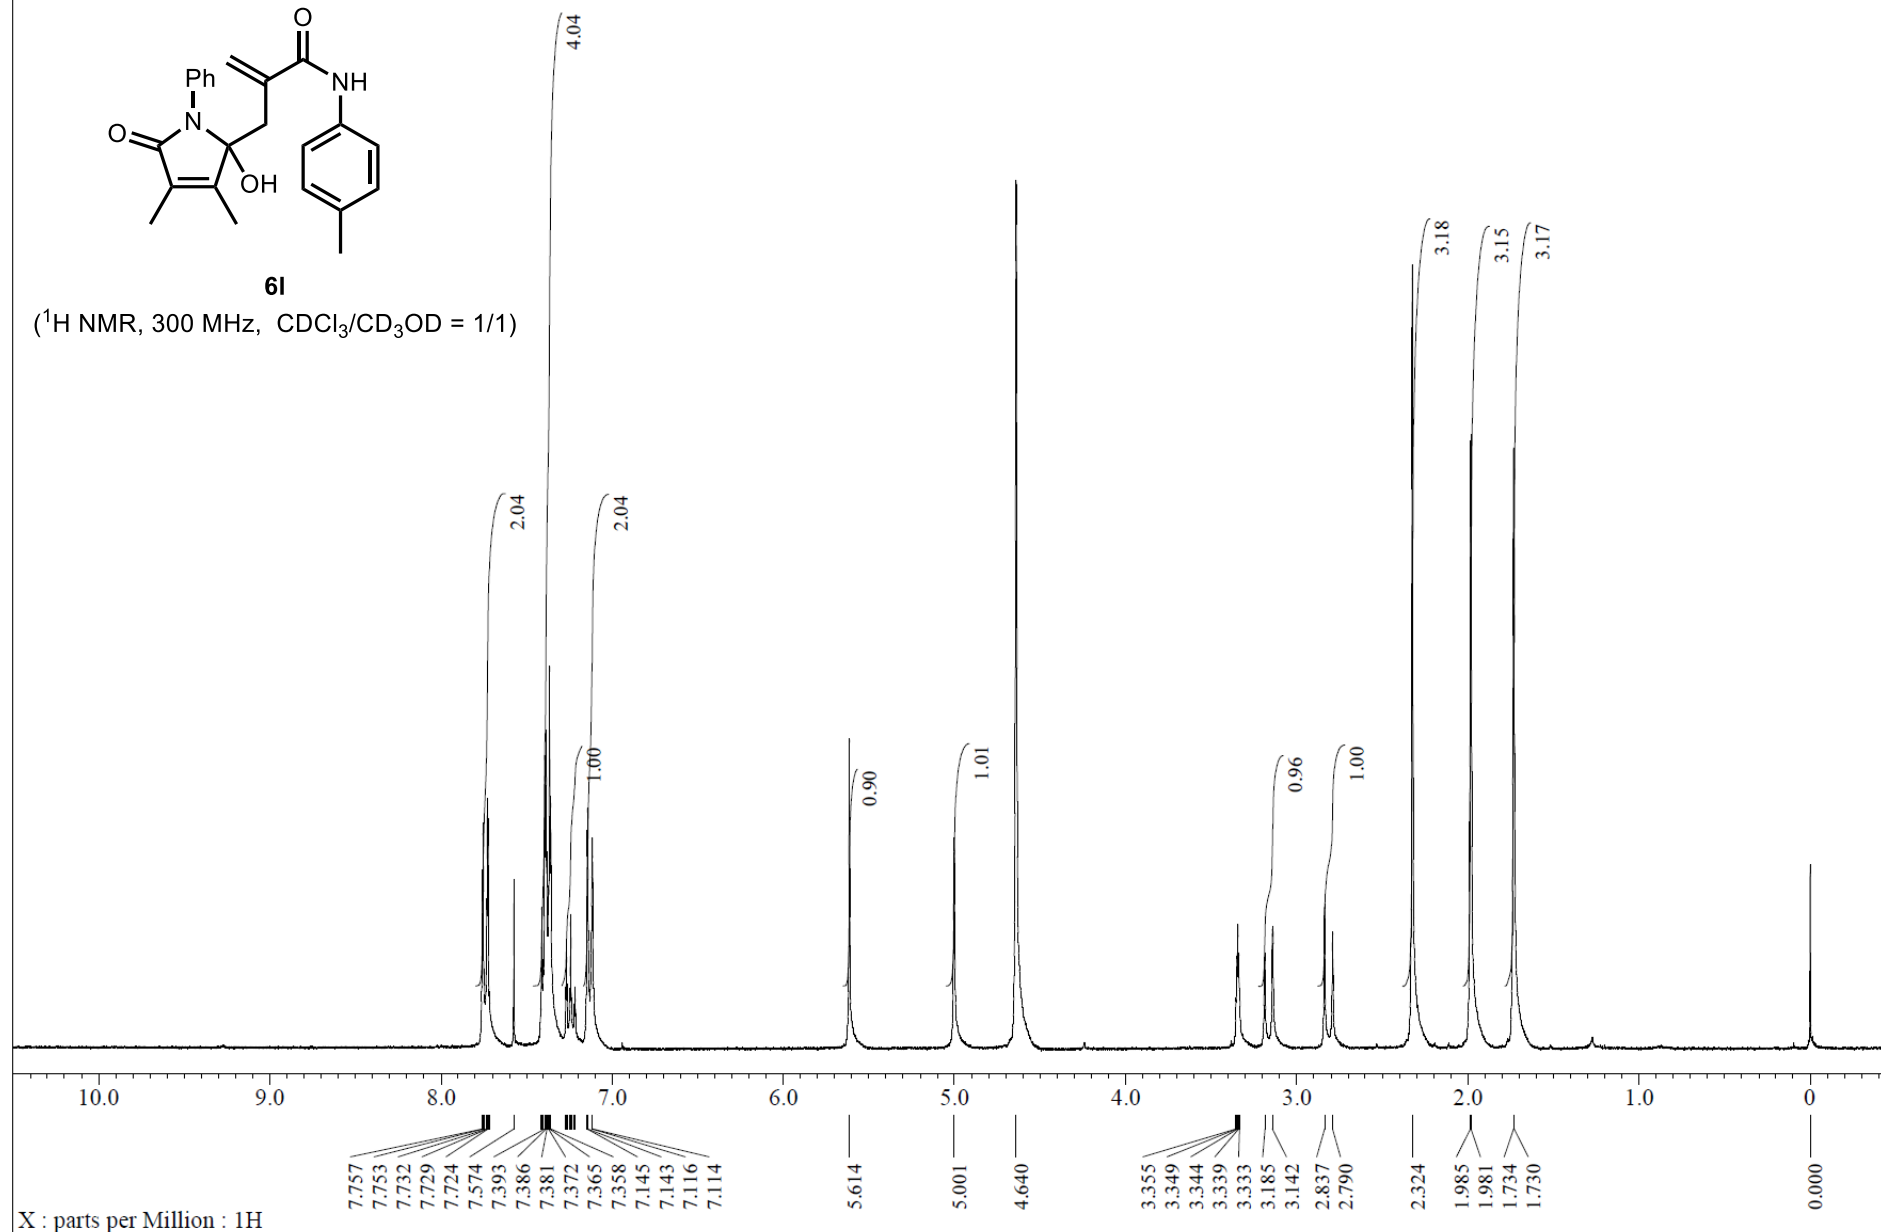

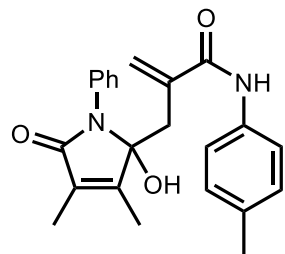

**6I**

( $^{13}\text{C}$  NMR, 75 MHz,  $\text{CDCl}_3/\text{CD}_3\text{OD} = 1/1$ )

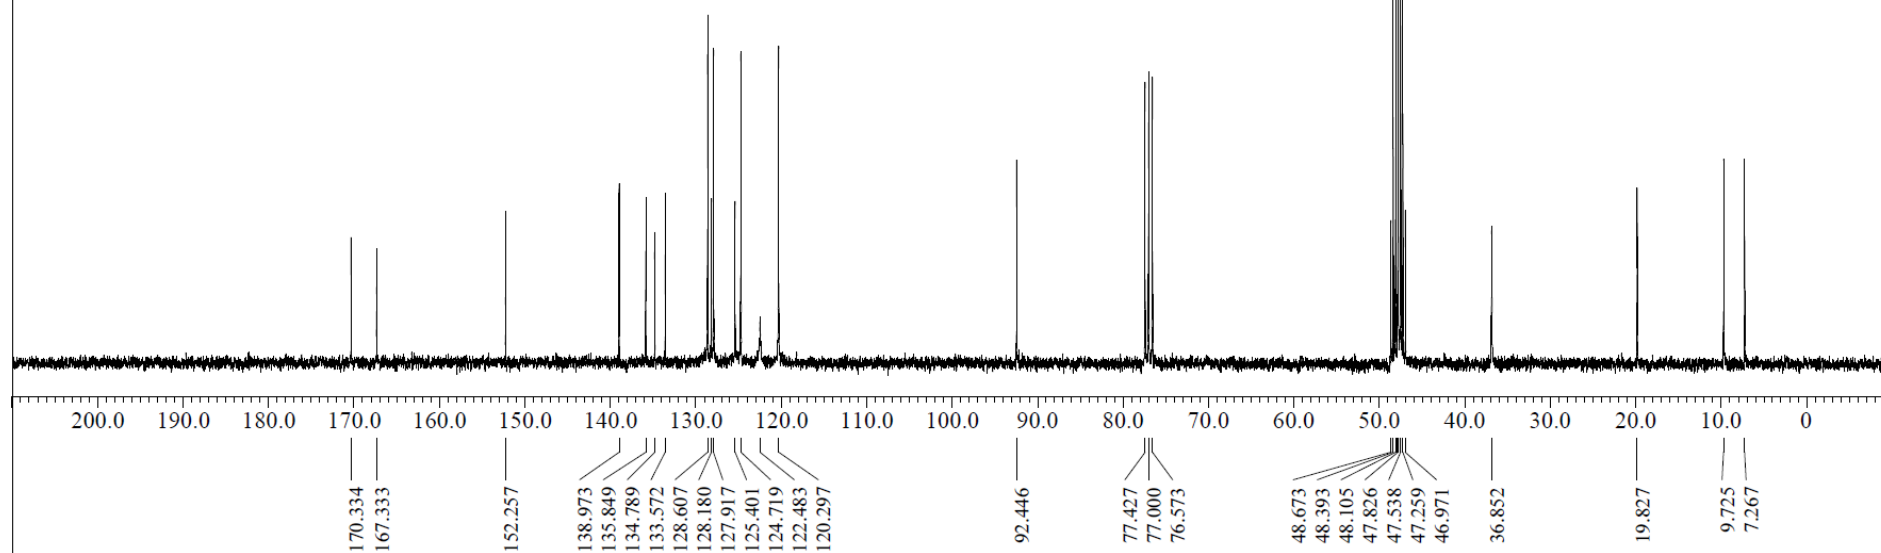

X : parts per Million :  $^{13}\text{C}$

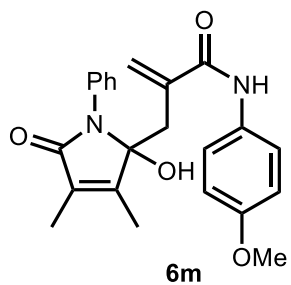

( $^1\text{H}$  NMR, 300 MHz,  $\text{CDCl}_3/\text{CD}_3\text{OD} = 1/1$ )

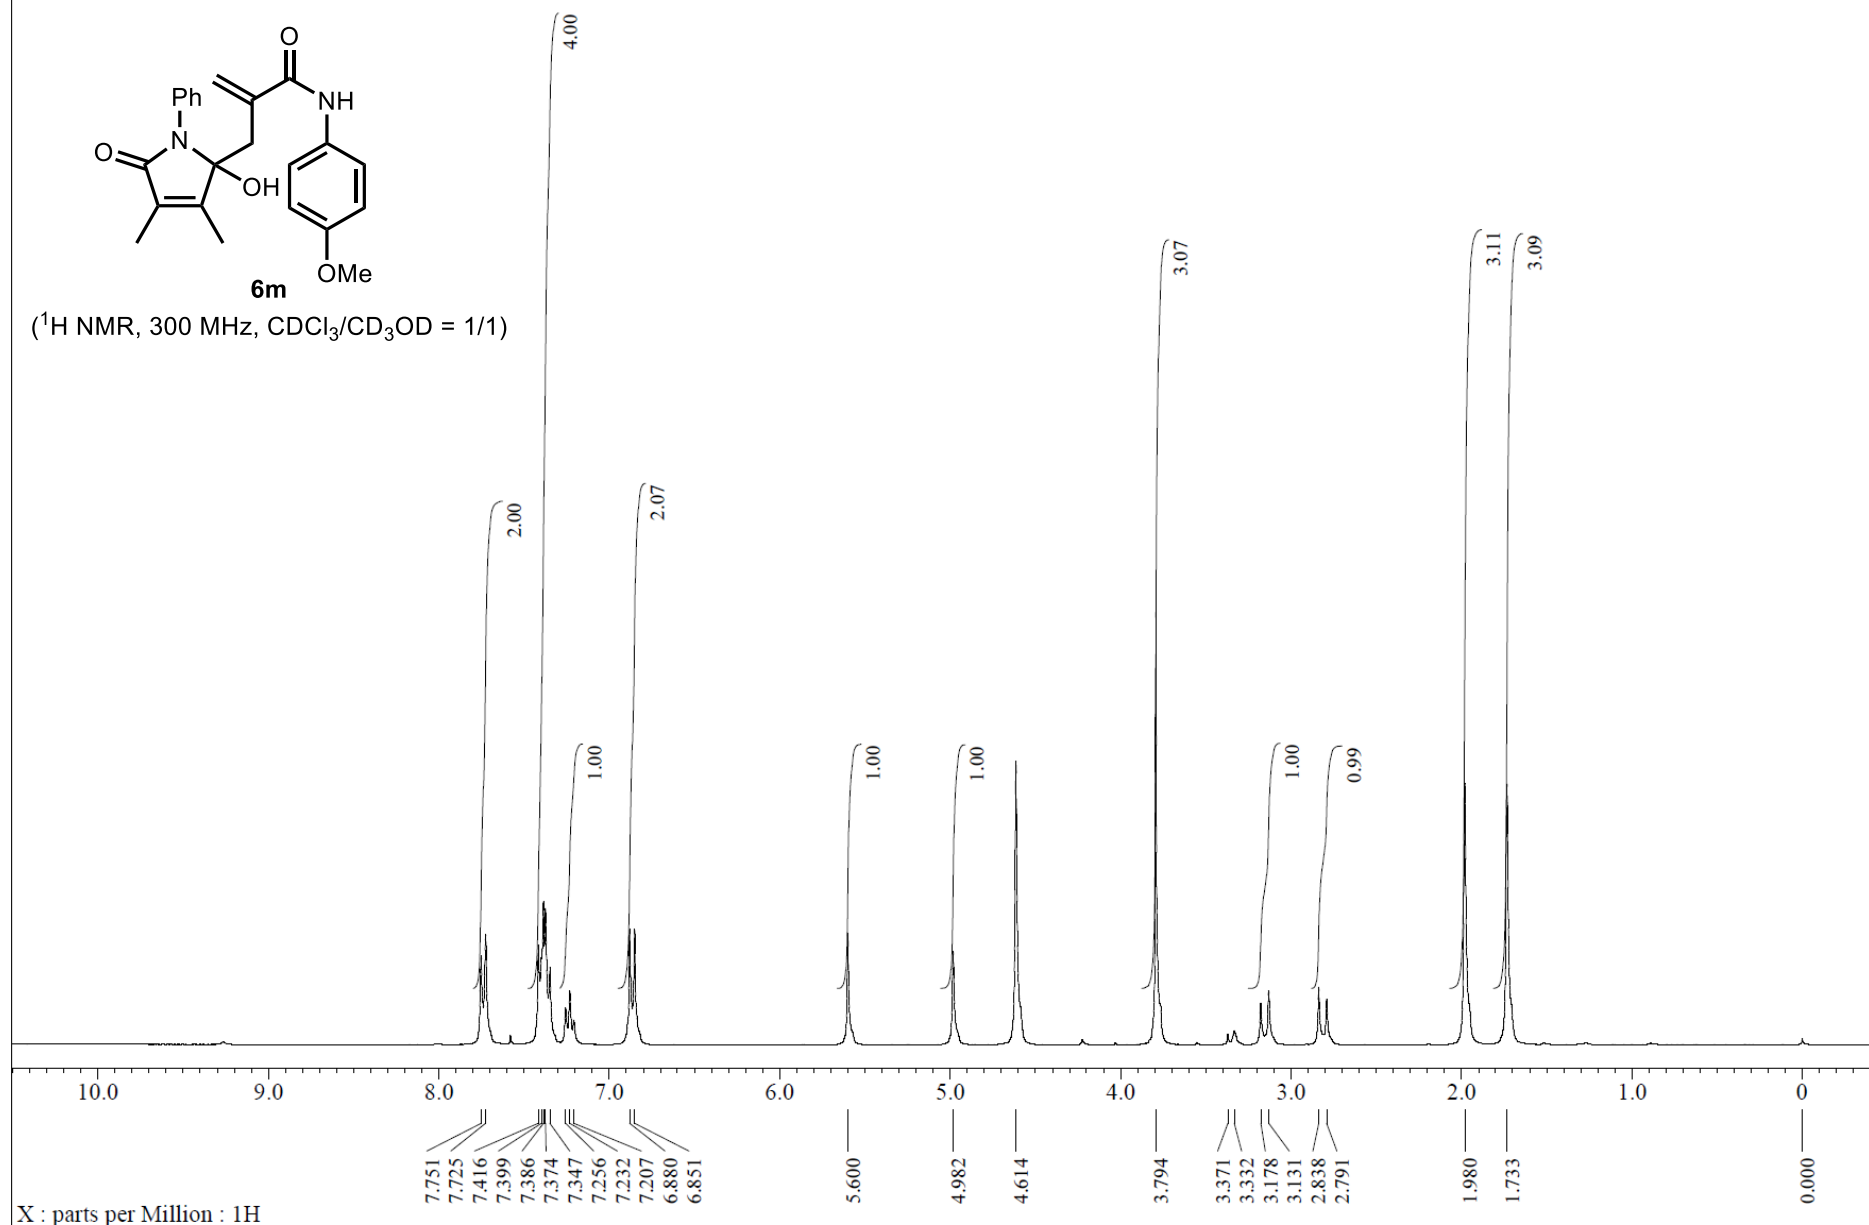

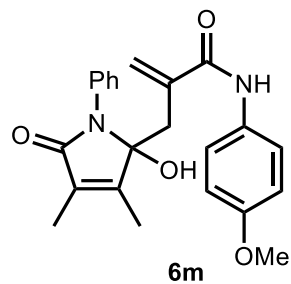

( $^{13}\text{C}$  NMR, 75 MHz,  $\text{CDCl}_3/\text{CD}_3\text{OD} = 1/1$ )

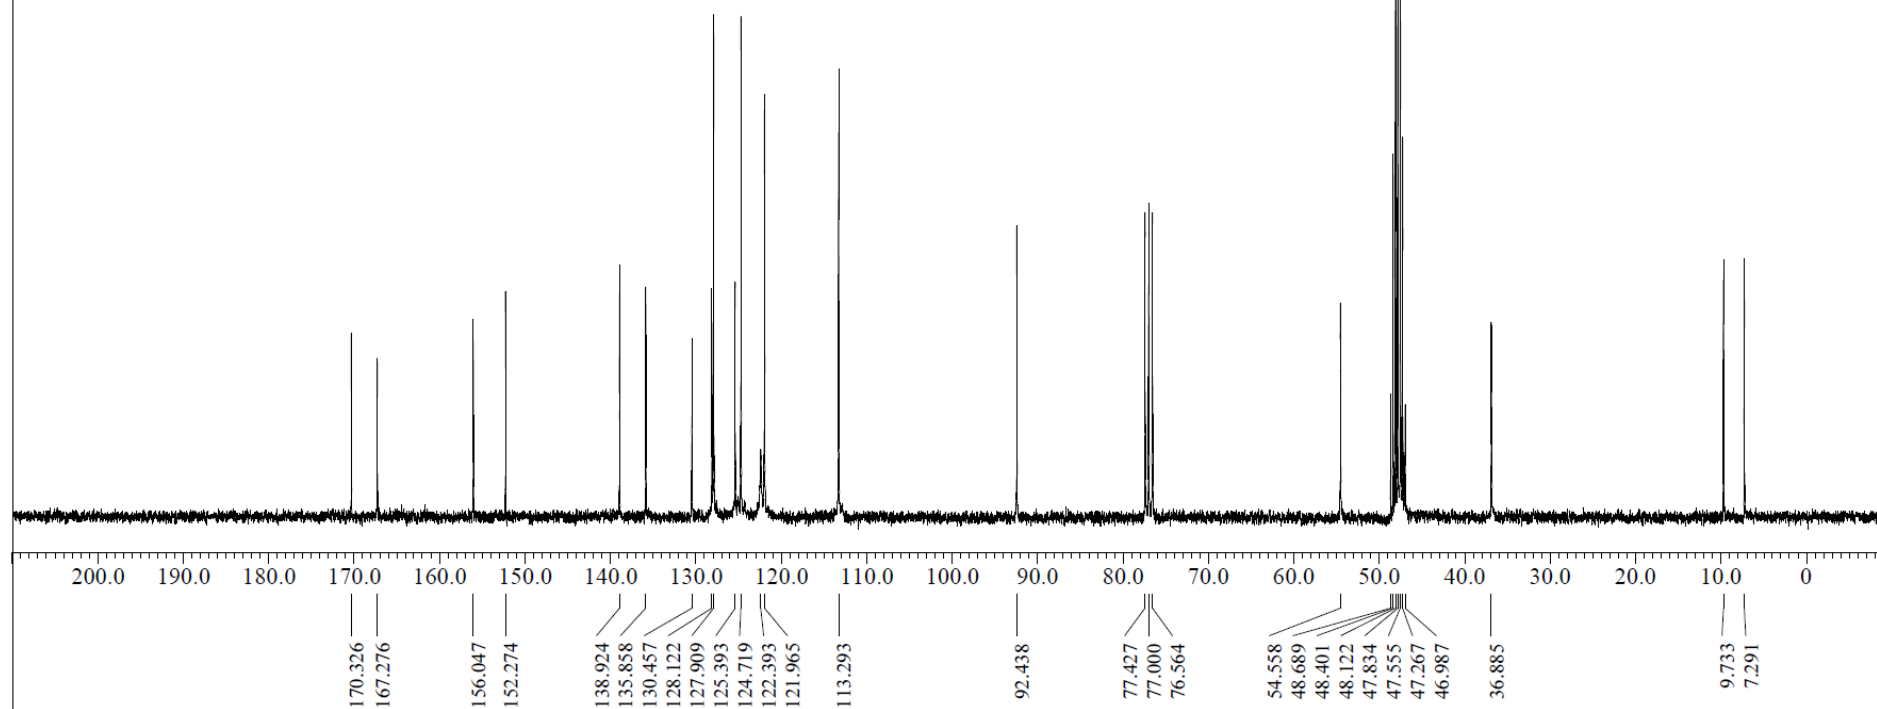

X : parts per Million :  $^{13}\text{C}$

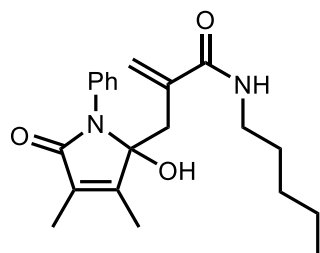

**6n**

( $^1\text{H}$  NMR, 300 MHz,  $\text{CDCl}_3/\text{CD}_3\text{OD} = 1/1$ )

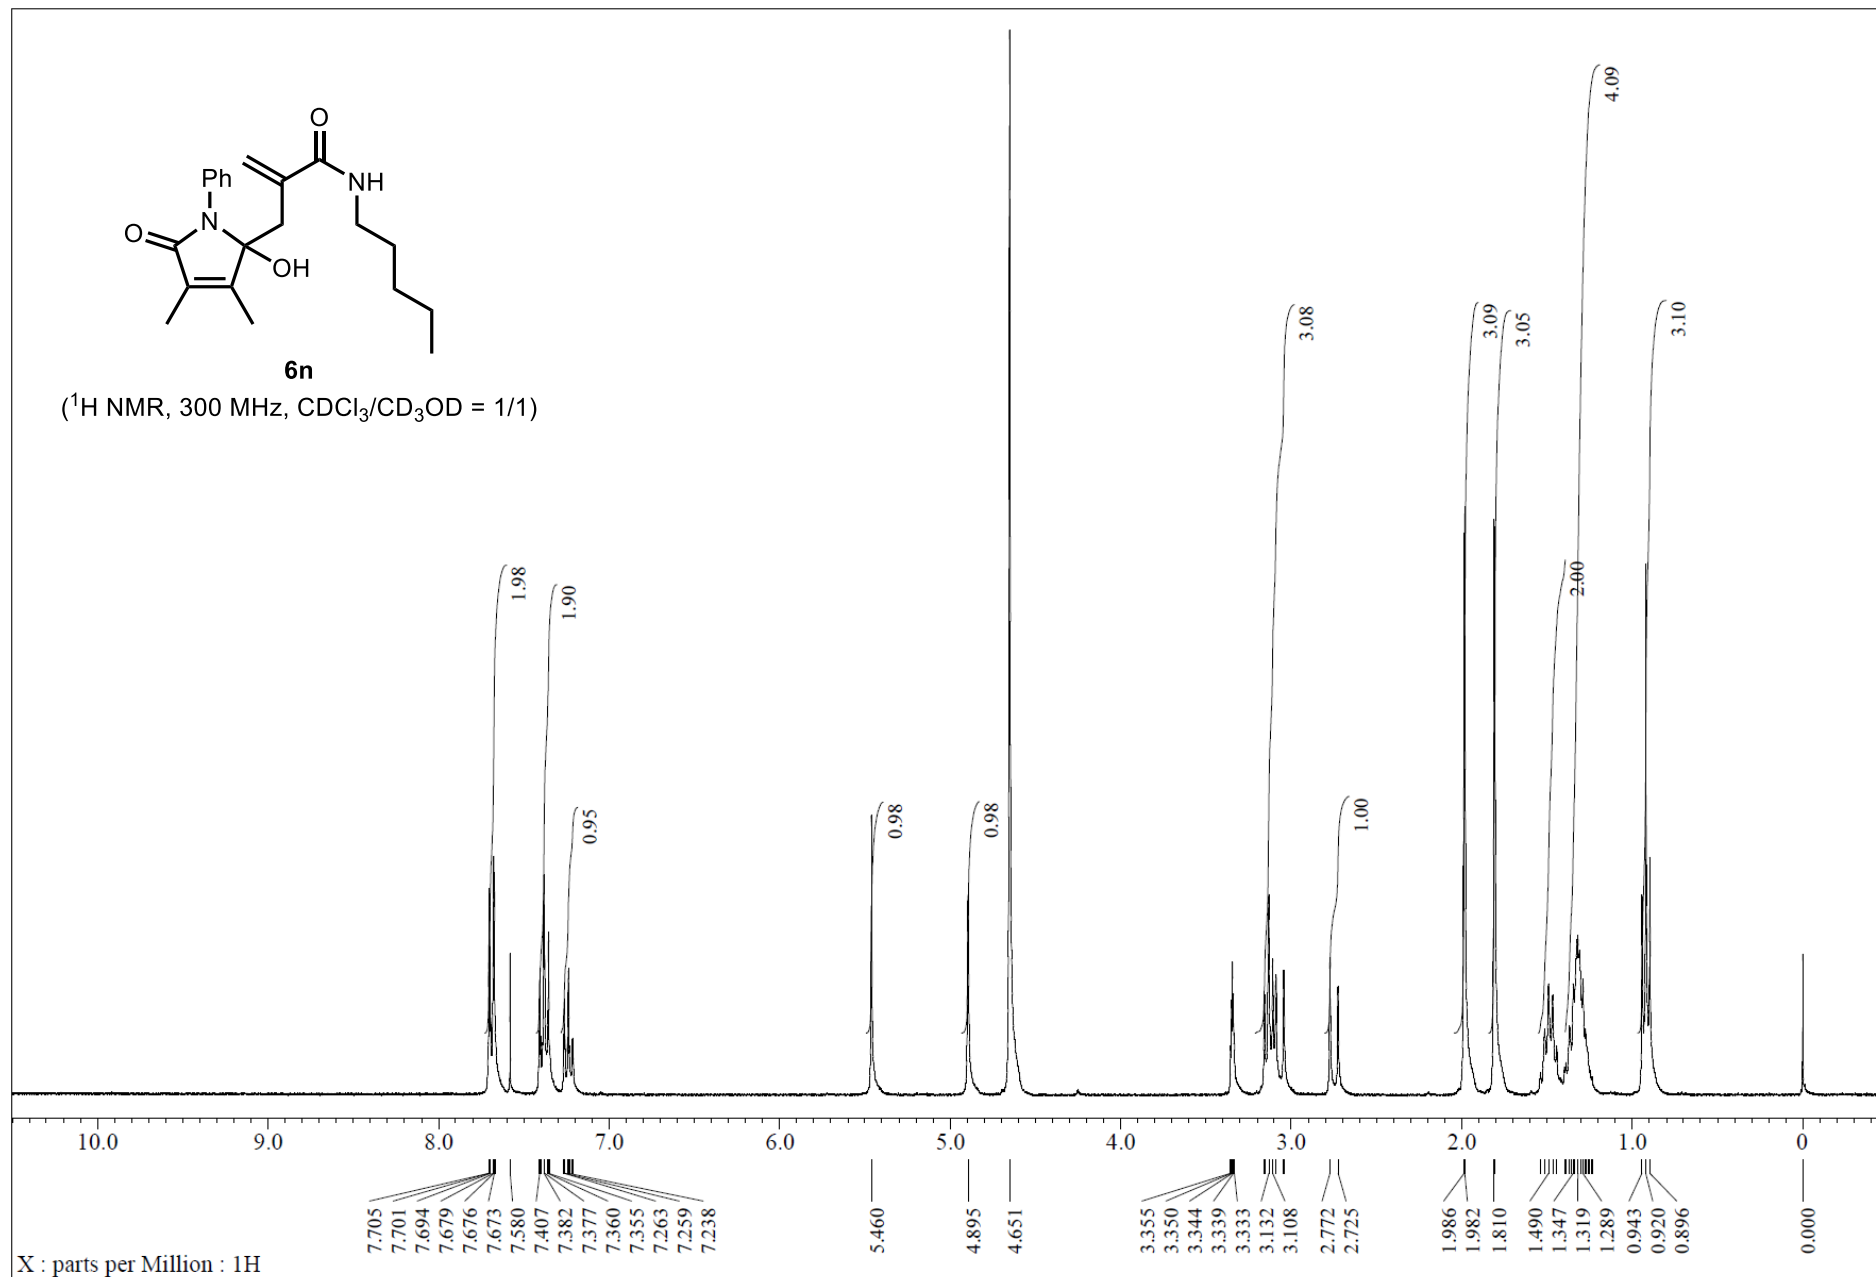

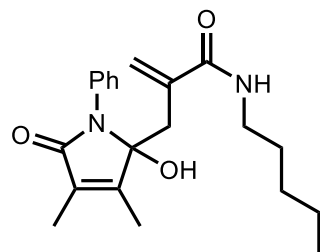

**6n**

( $^{13}\text{C}$  NMR, 75 MHz,  $\text{CDCl}_3/\text{CD}_3\text{OD} = 1/1$ )

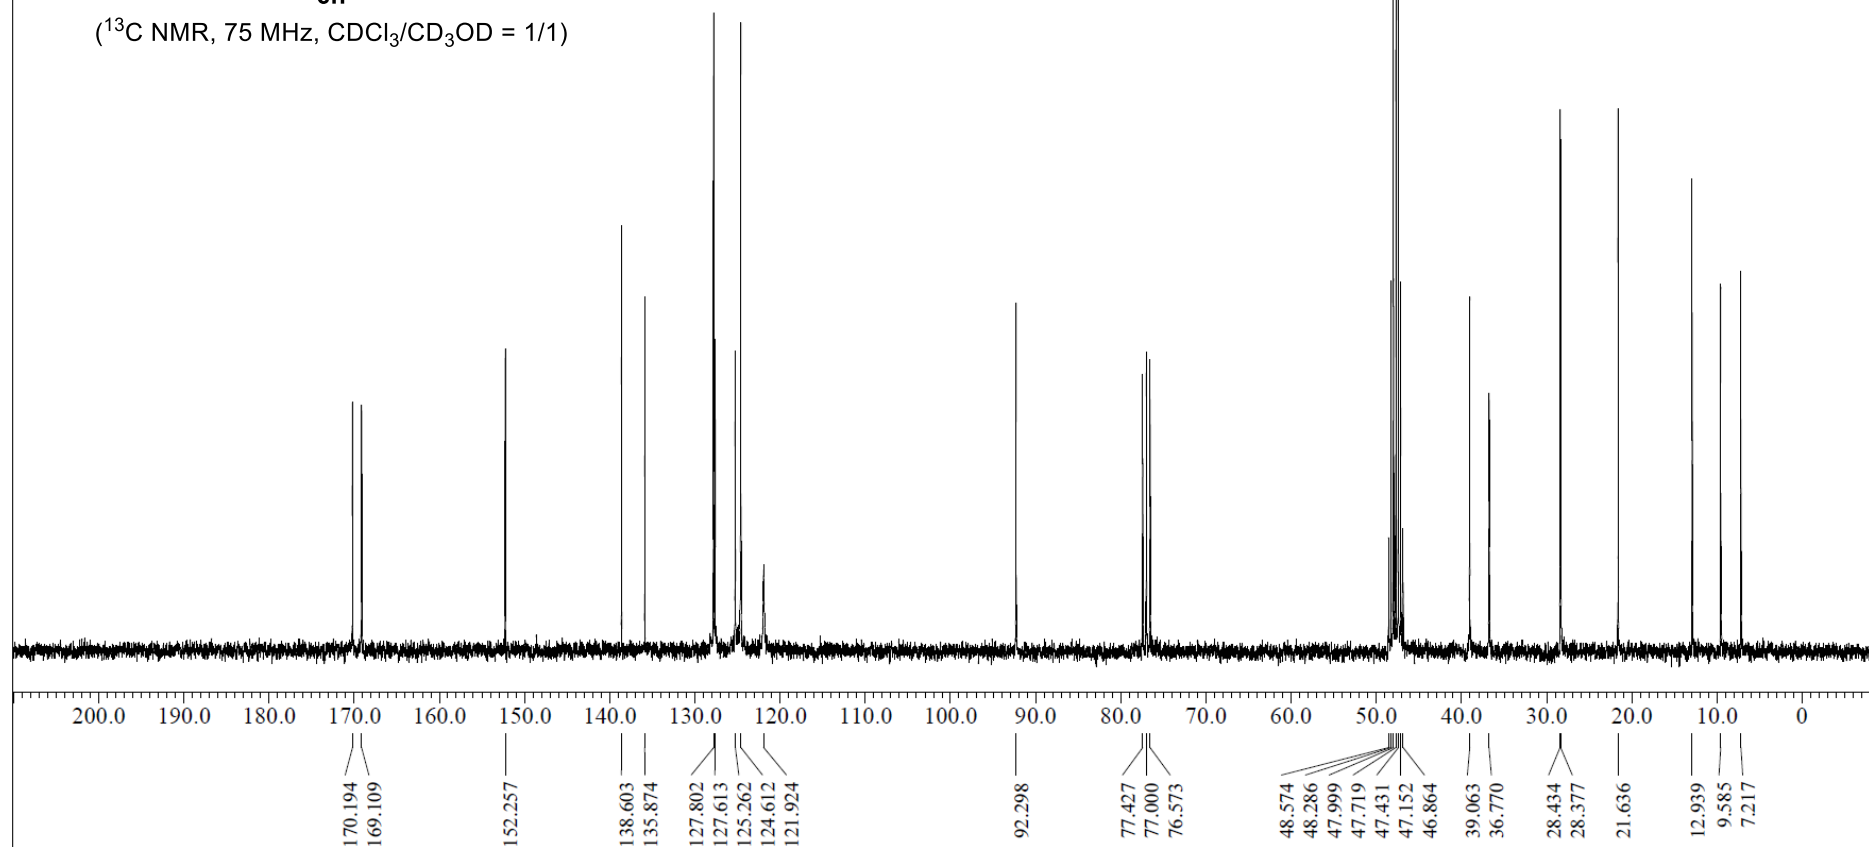

X : parts per Million :  $^{13}\text{C}$



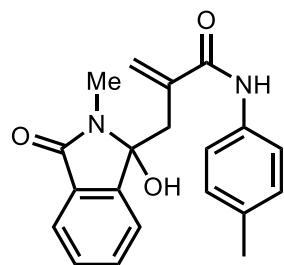

**6o**

( $^1\text{H}$  NMR, 300 MHz,  $\text{CDCl}_3/\text{CD}_3\text{OD} = 1/1$ )

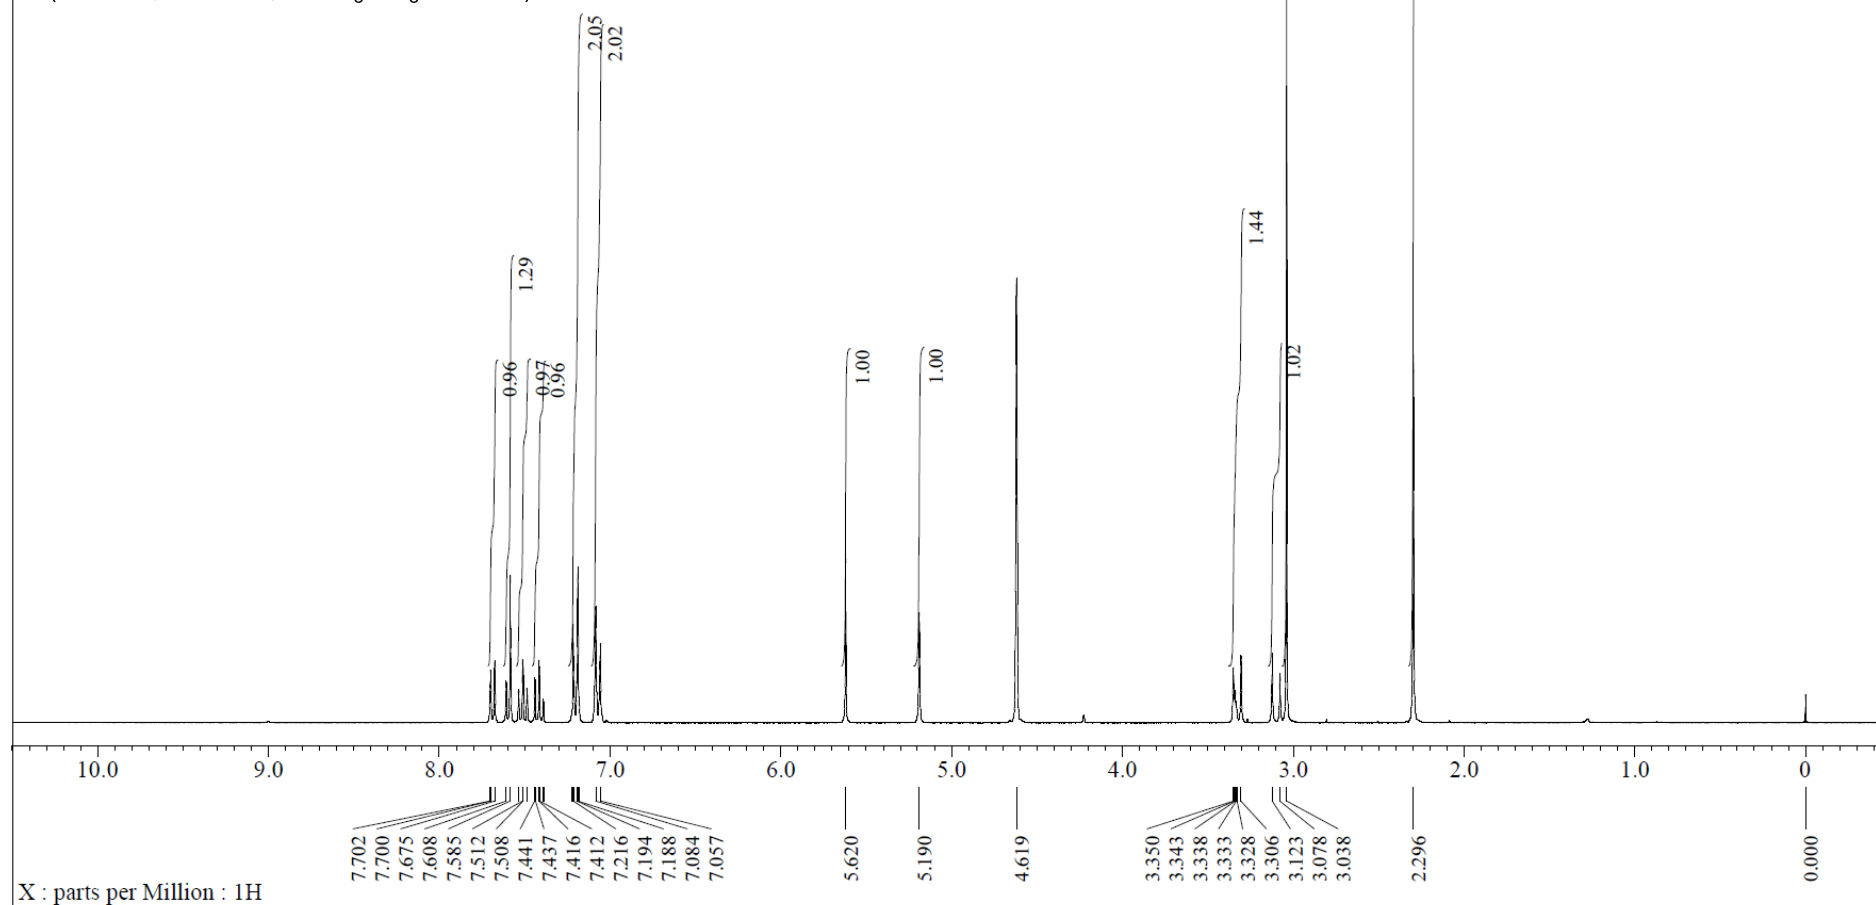

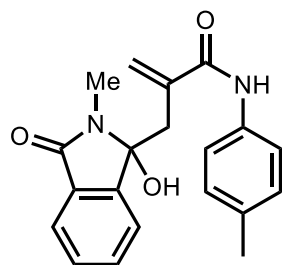

**6o**

( $^{13}\text{C}$  NMR, 75 MHz,  $\text{CDCl}_3/\text{CD}_3\text{OD} = 1/1$ )

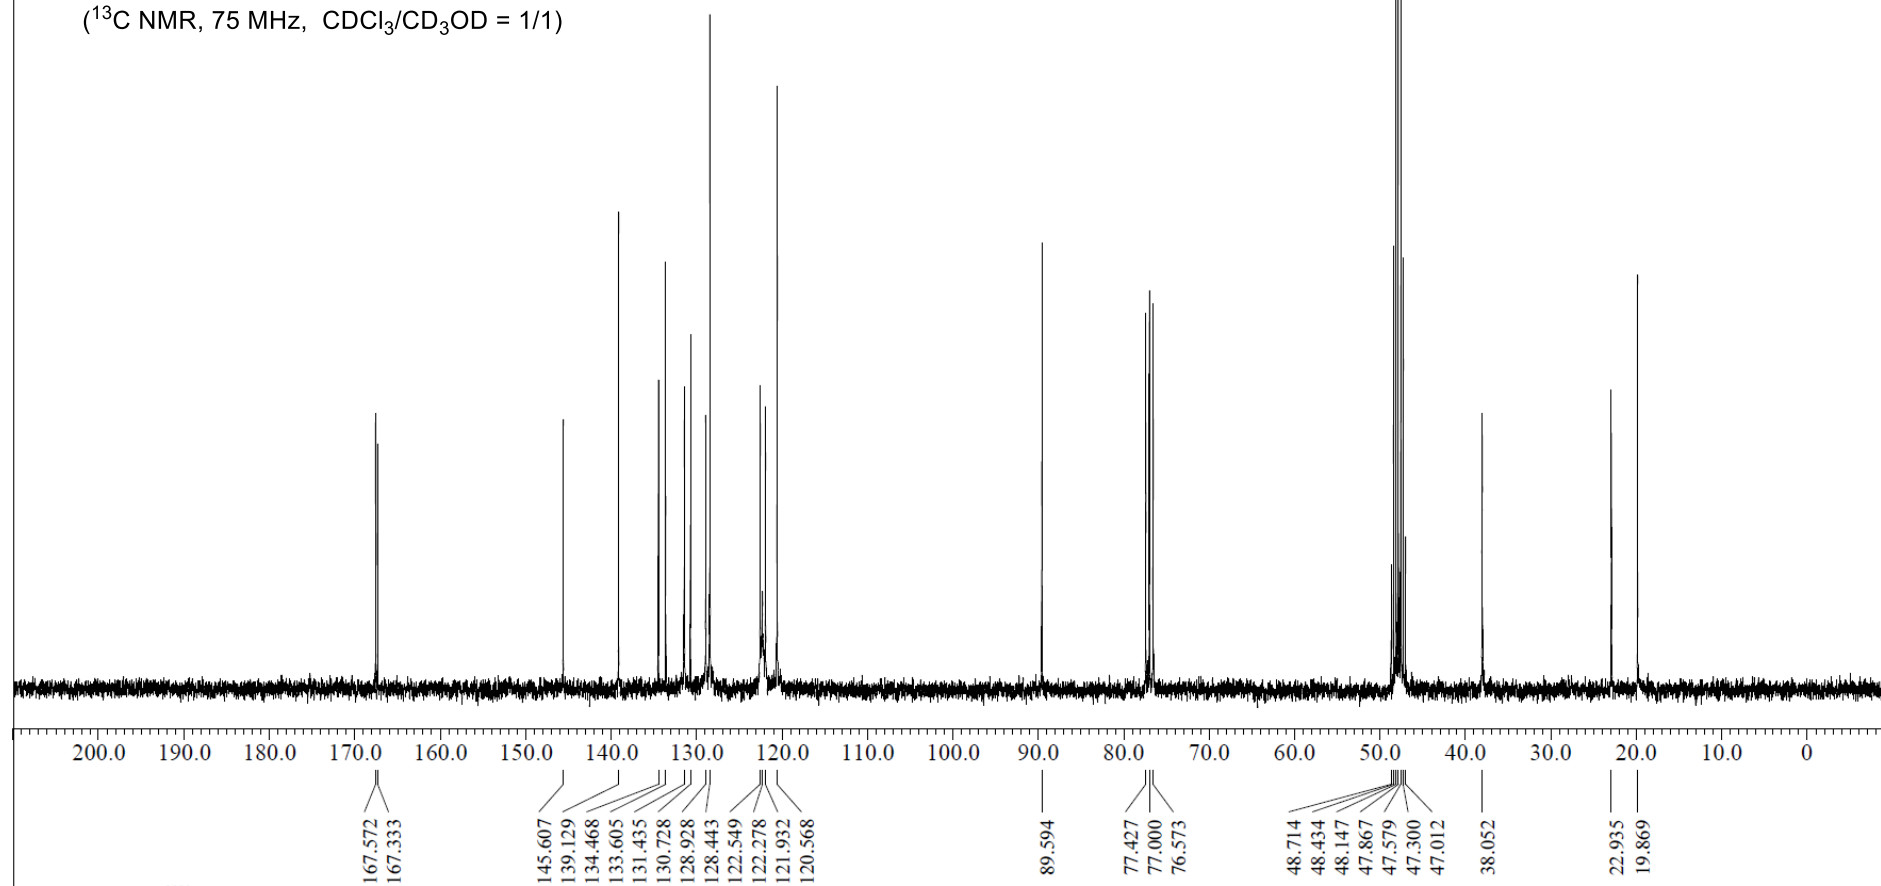

X : parts per Million :  $^{13}\text{C}$

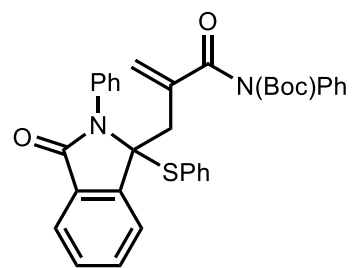

**7a**

(<sup>1</sup>H NMR, 300 MHz, CDCl<sub>3</sub>)

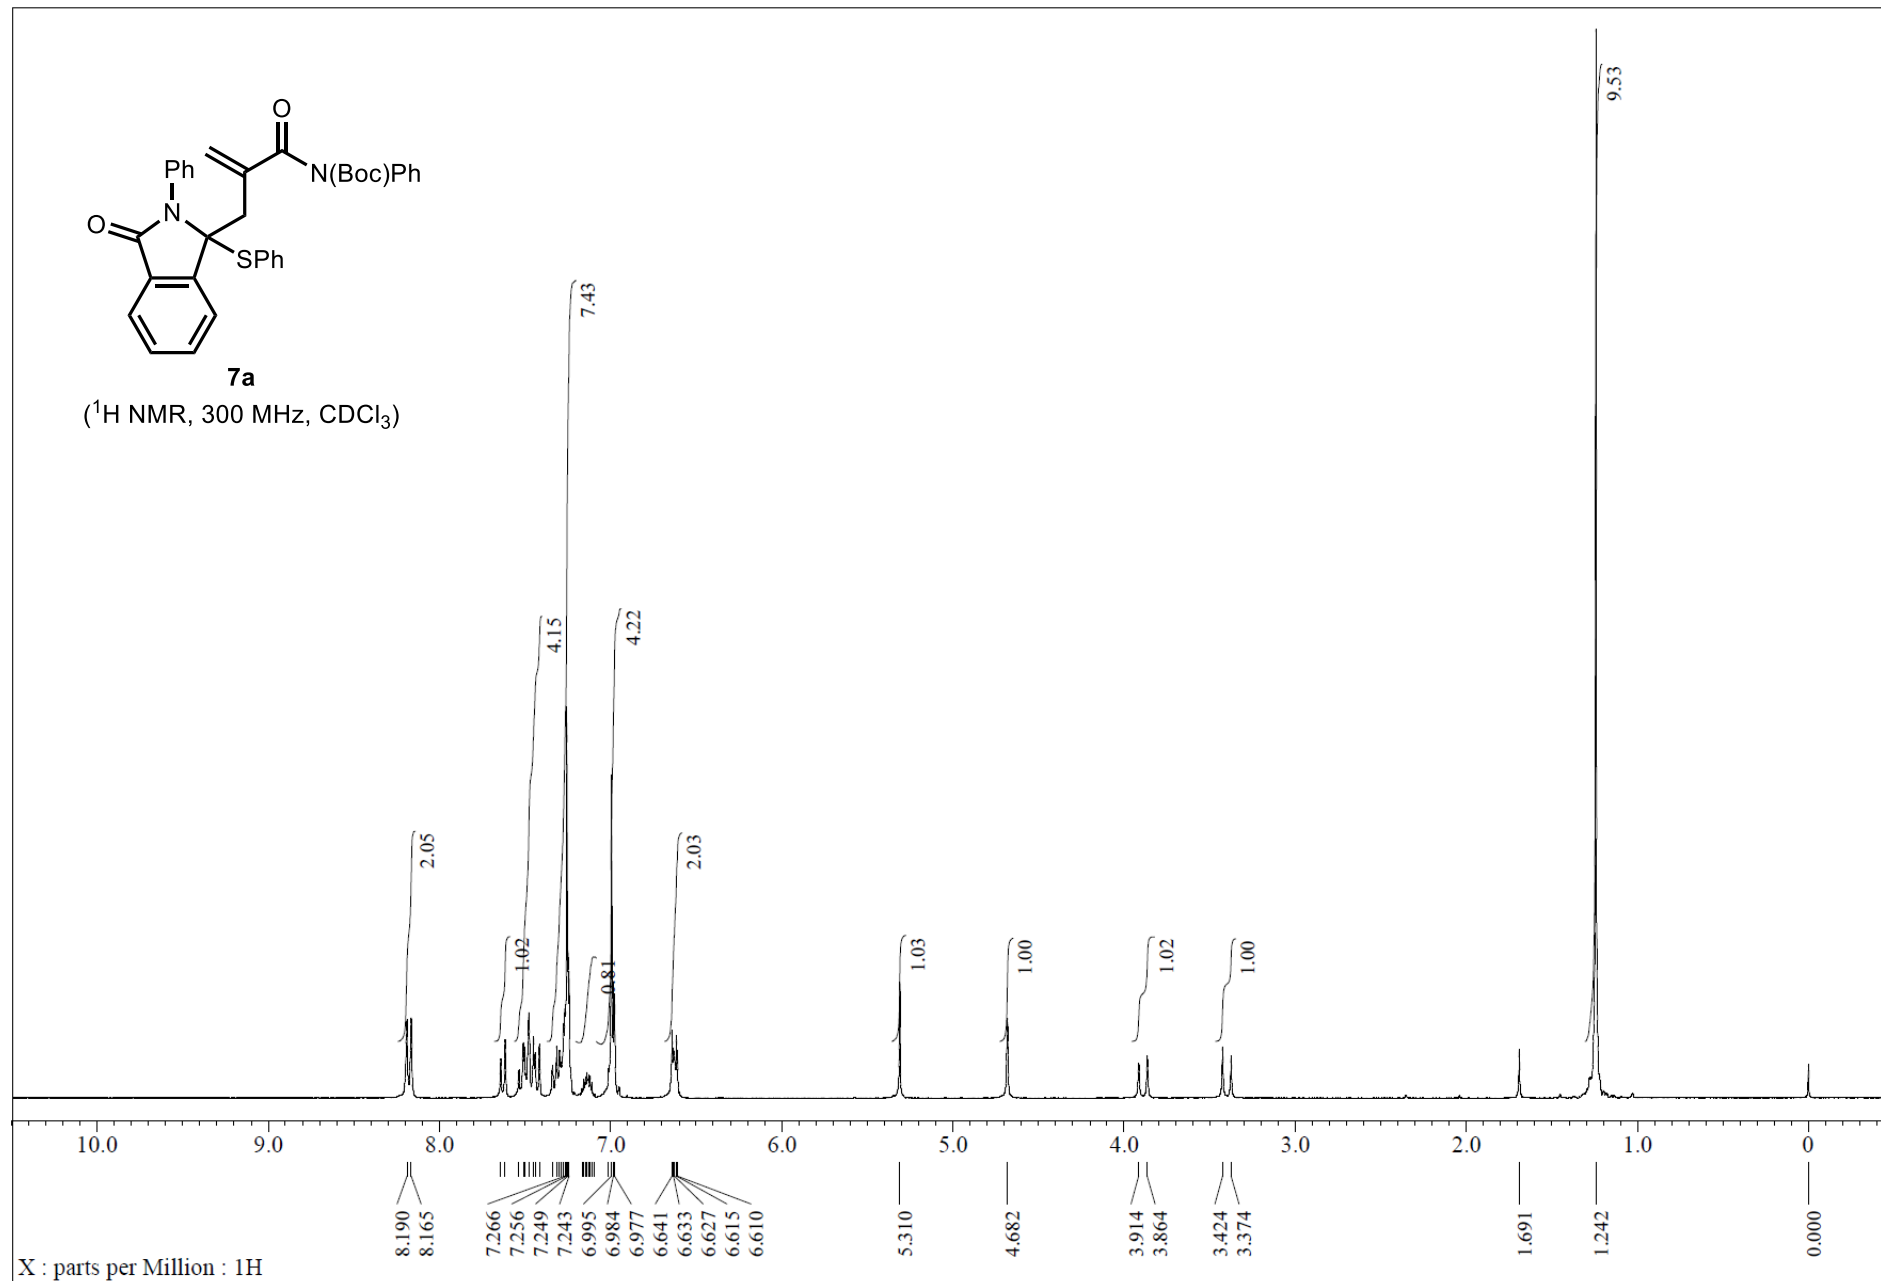

X : parts per Million : 1H

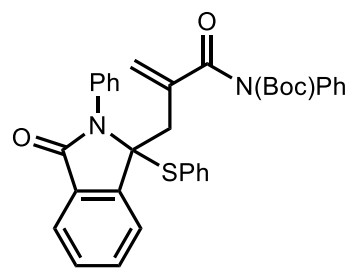

**7a**

( $^{13}\text{C}$  NMR, 75 MHz,  $\text{CDCl}_3$ )

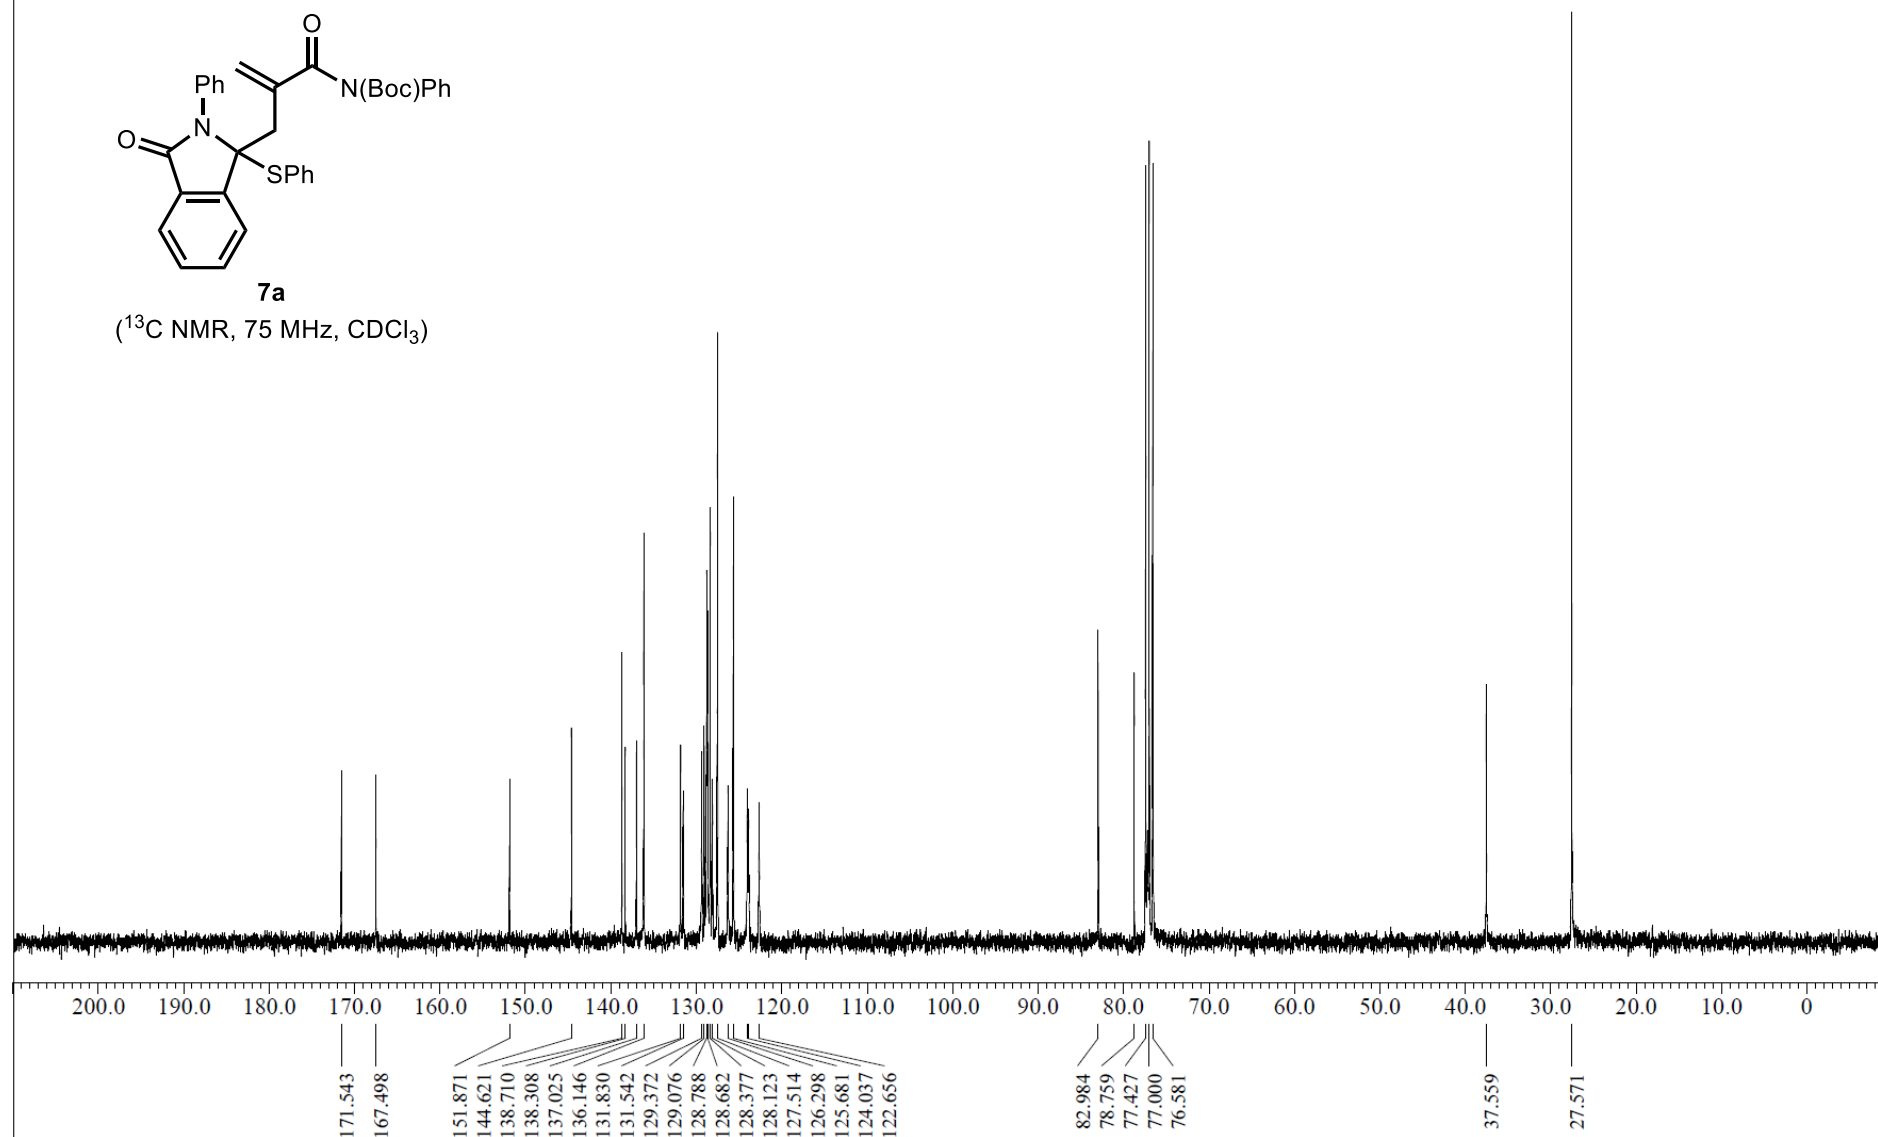

X : parts per Million :  $^{13}\text{C}$

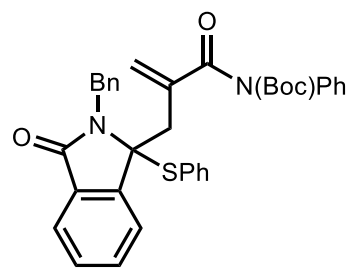

**7b**

(<sup>1</sup>H NMR, 300 MHz, CDCl<sub>3</sub>)

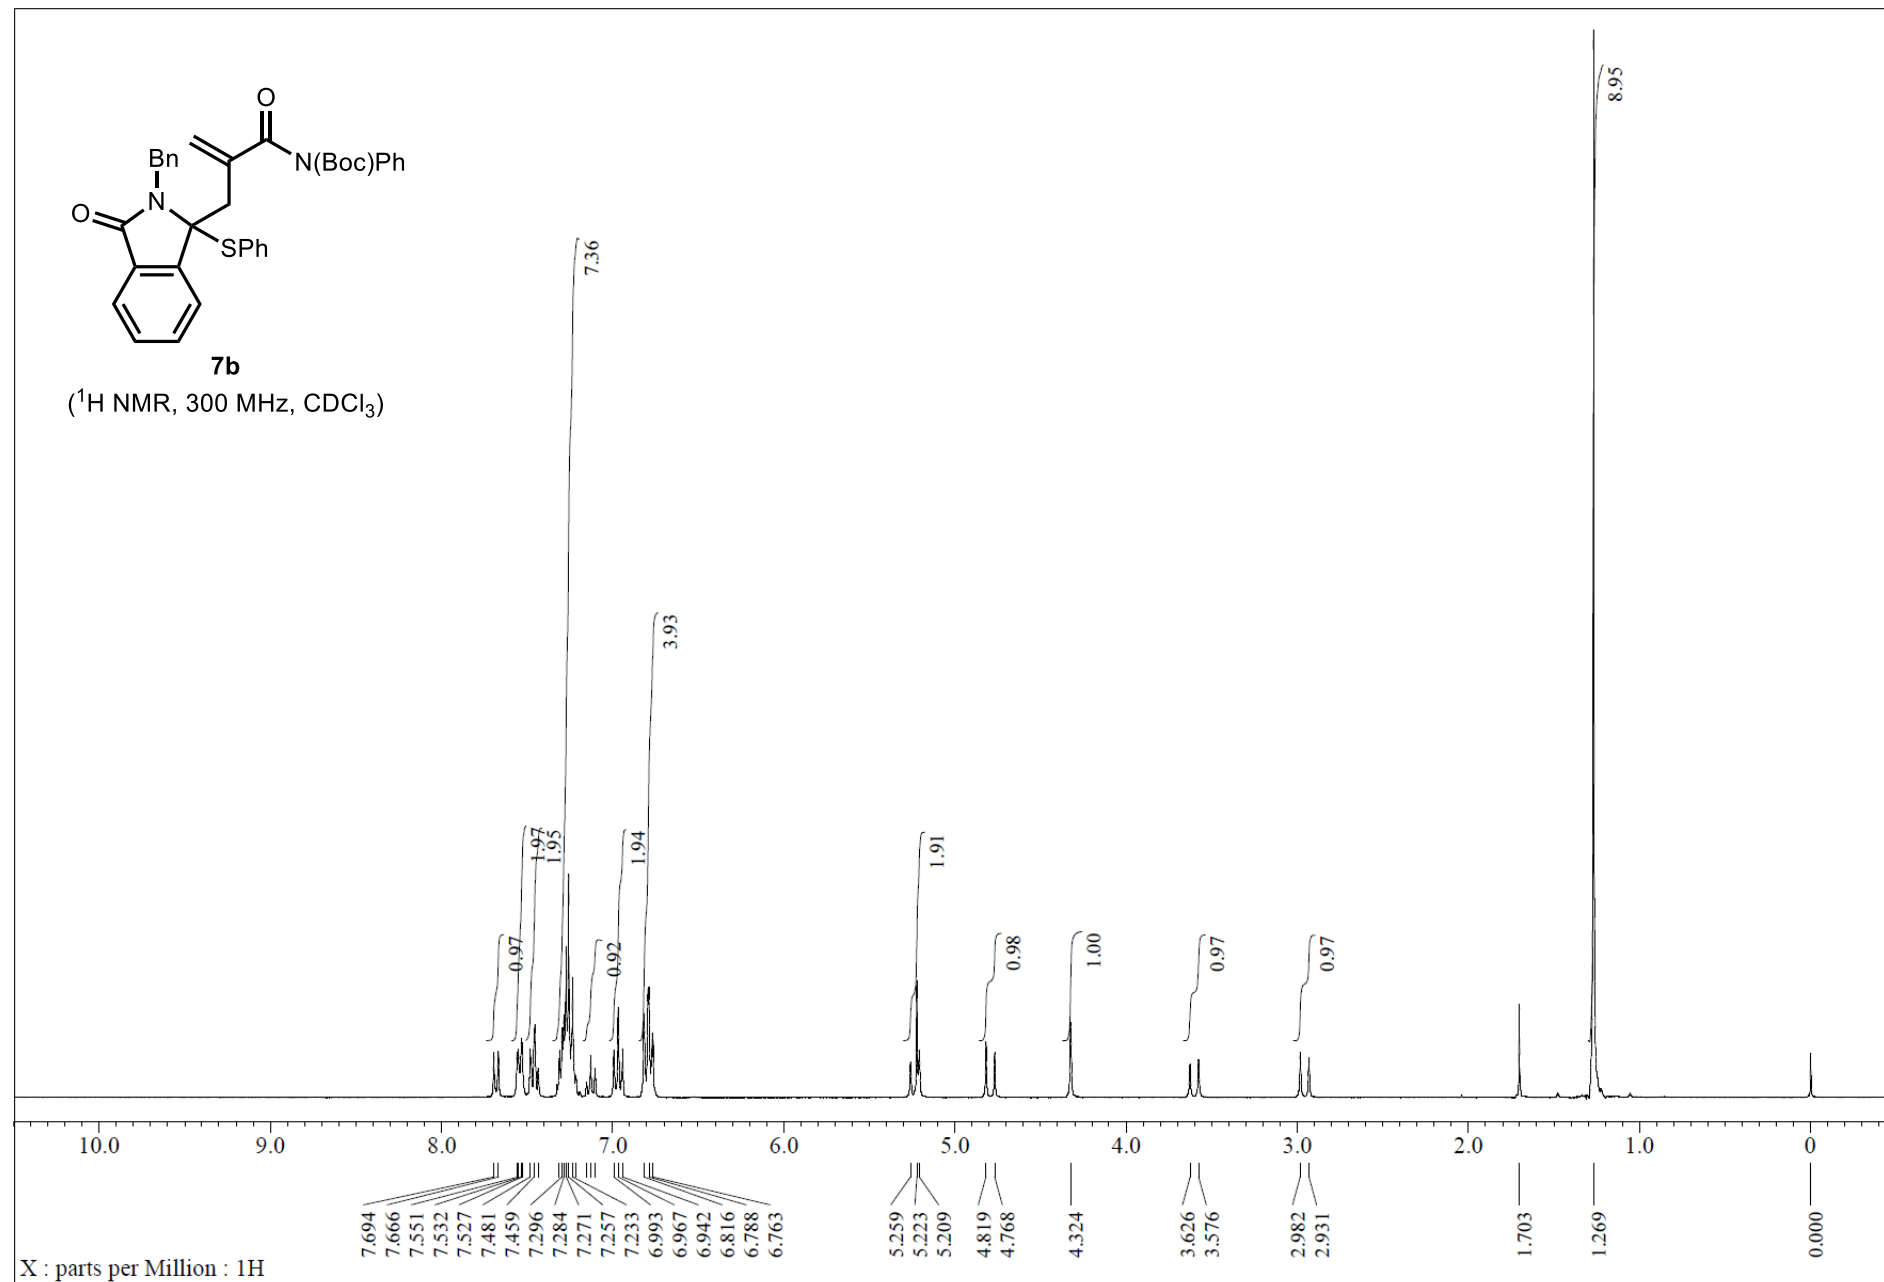

X : parts per Million : 1H

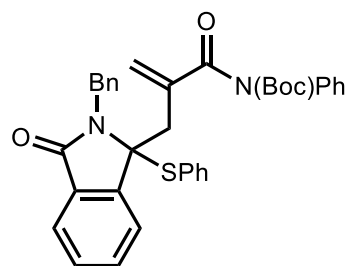

**7b**

( $^{13}\text{C}$  NMR, 75 MHz,  $\text{CDCl}_3$ )

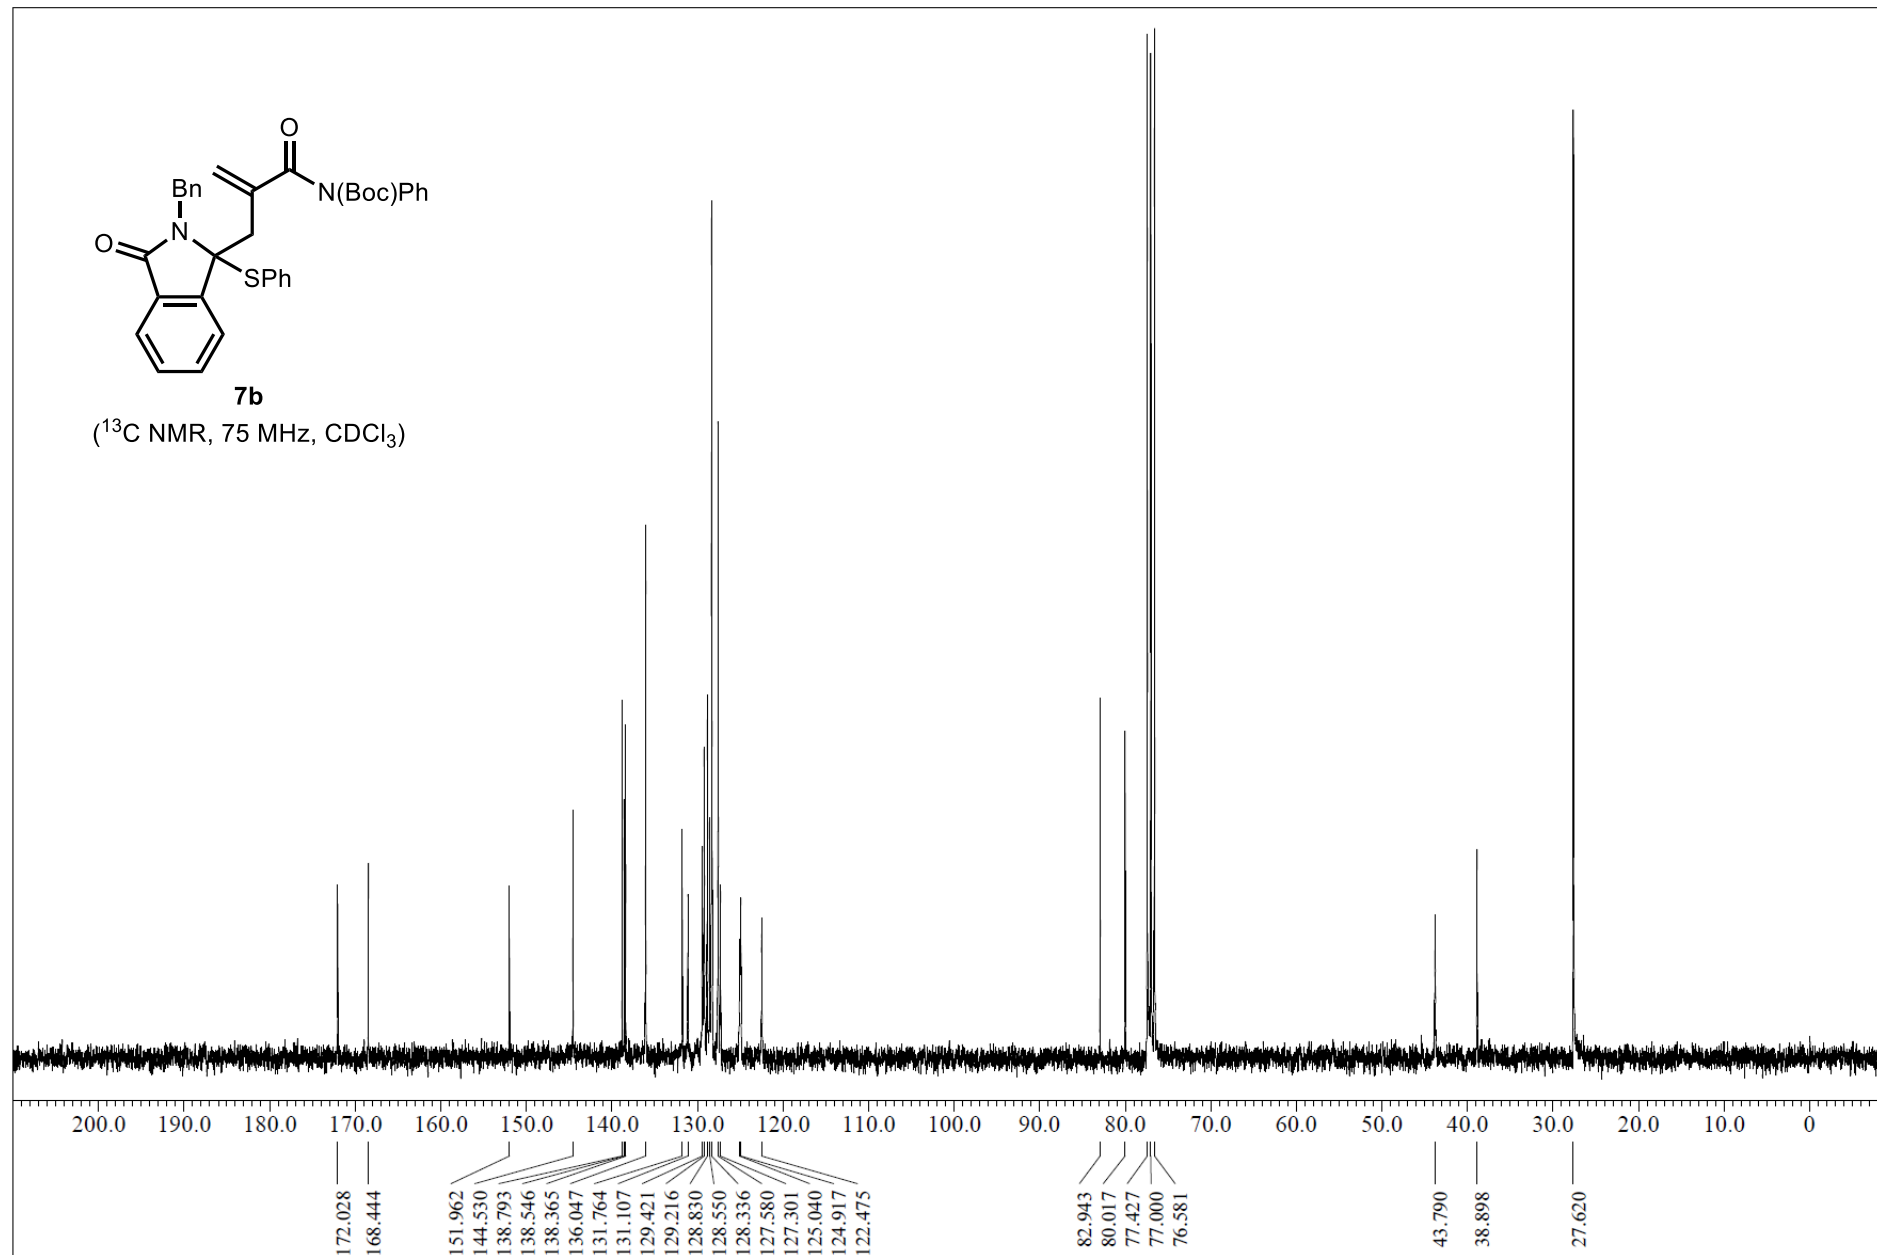

X : parts per Million :  $^{13}\text{C}$

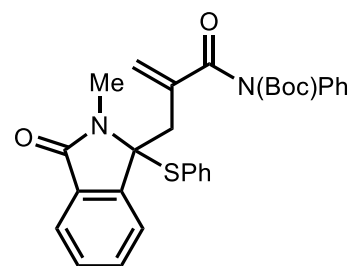

**7c**

(<sup>1</sup>H NMR, 300 MHz, CDCl<sub>3</sub>)

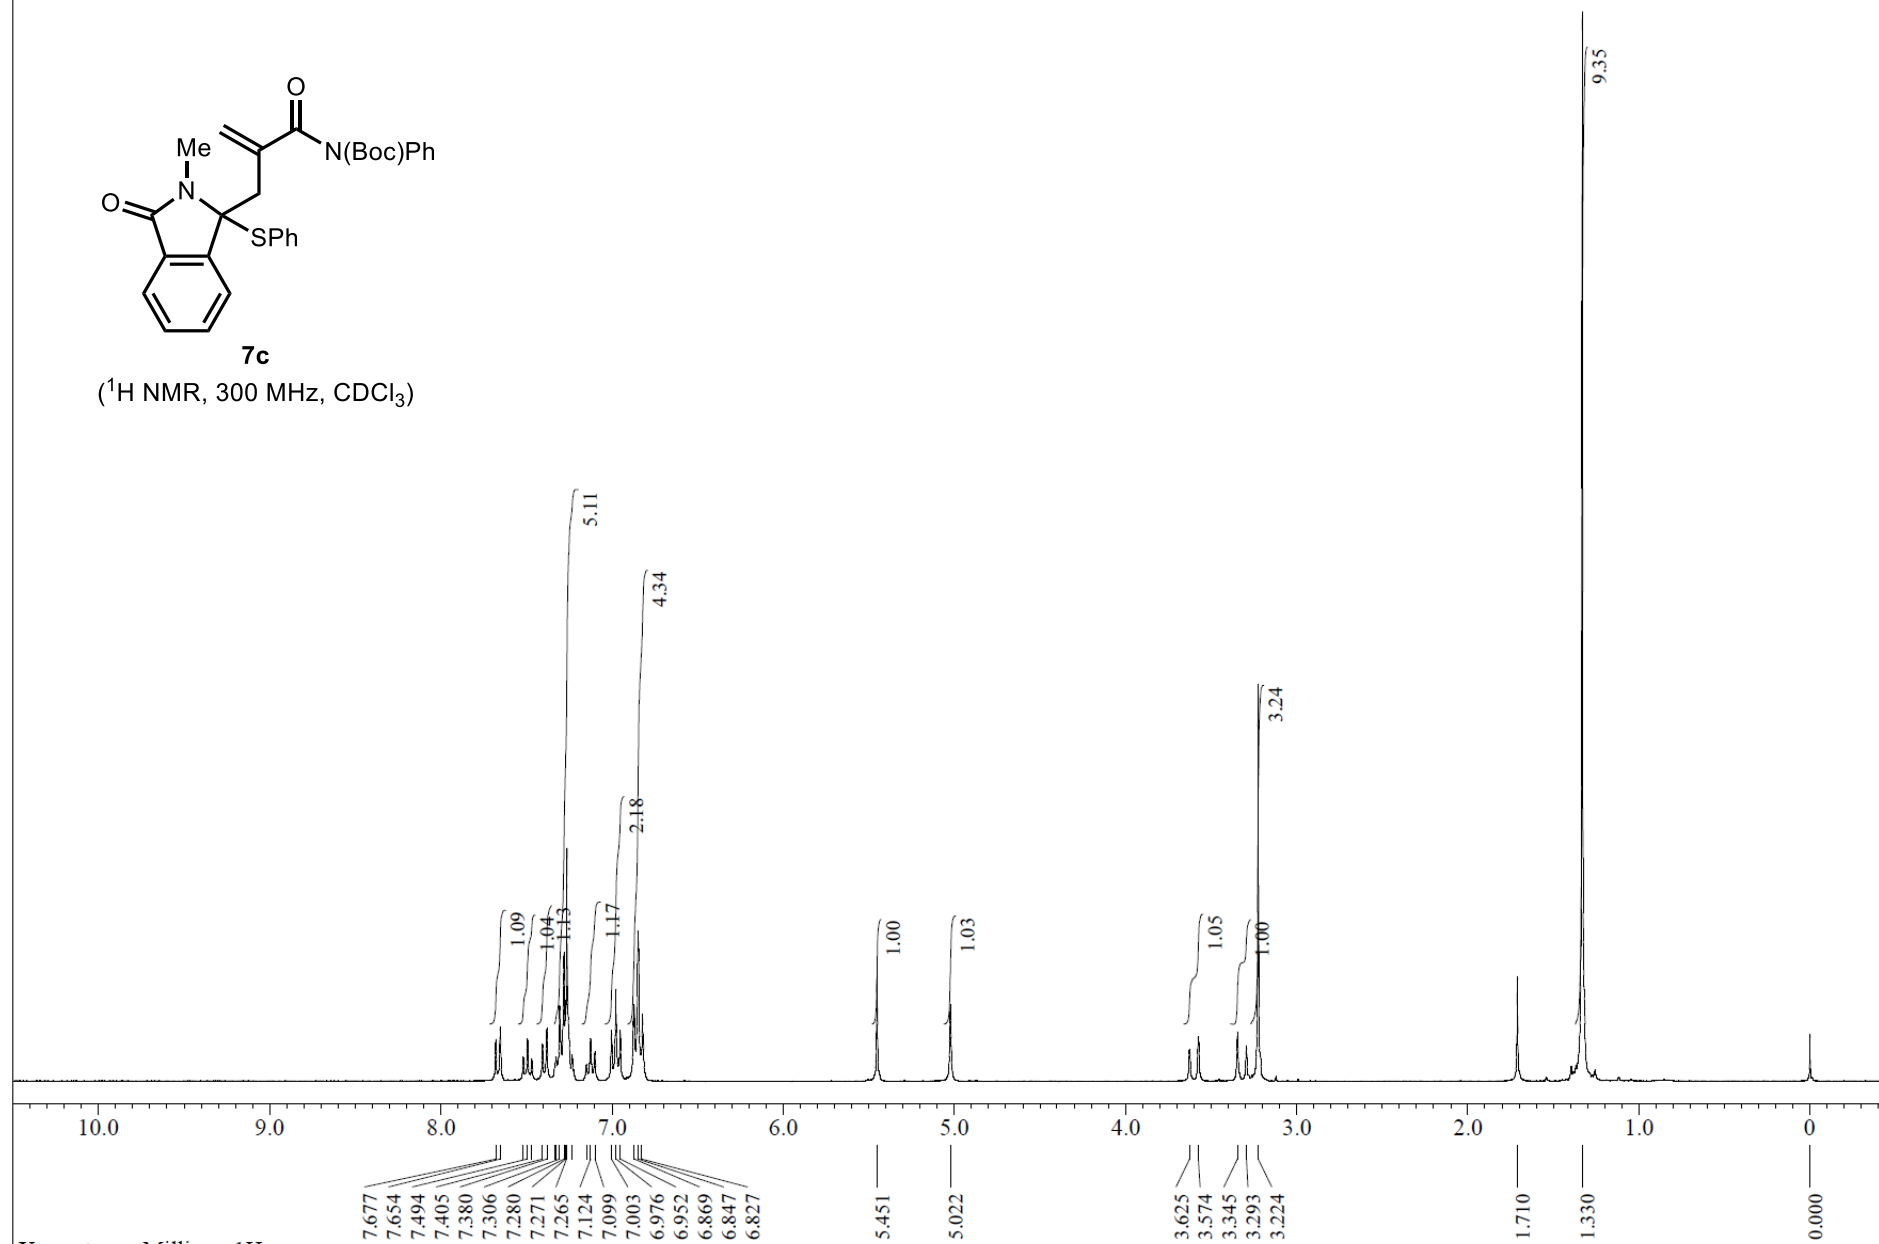

X : parts per Million : 1H

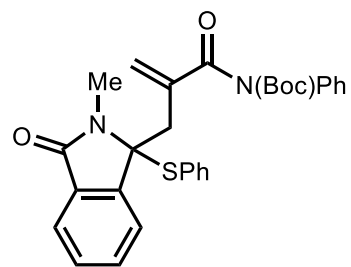

**7c**  
( $^{13}\text{C}$  NMR, 75 MHz,  $\text{CDCl}_3$ )

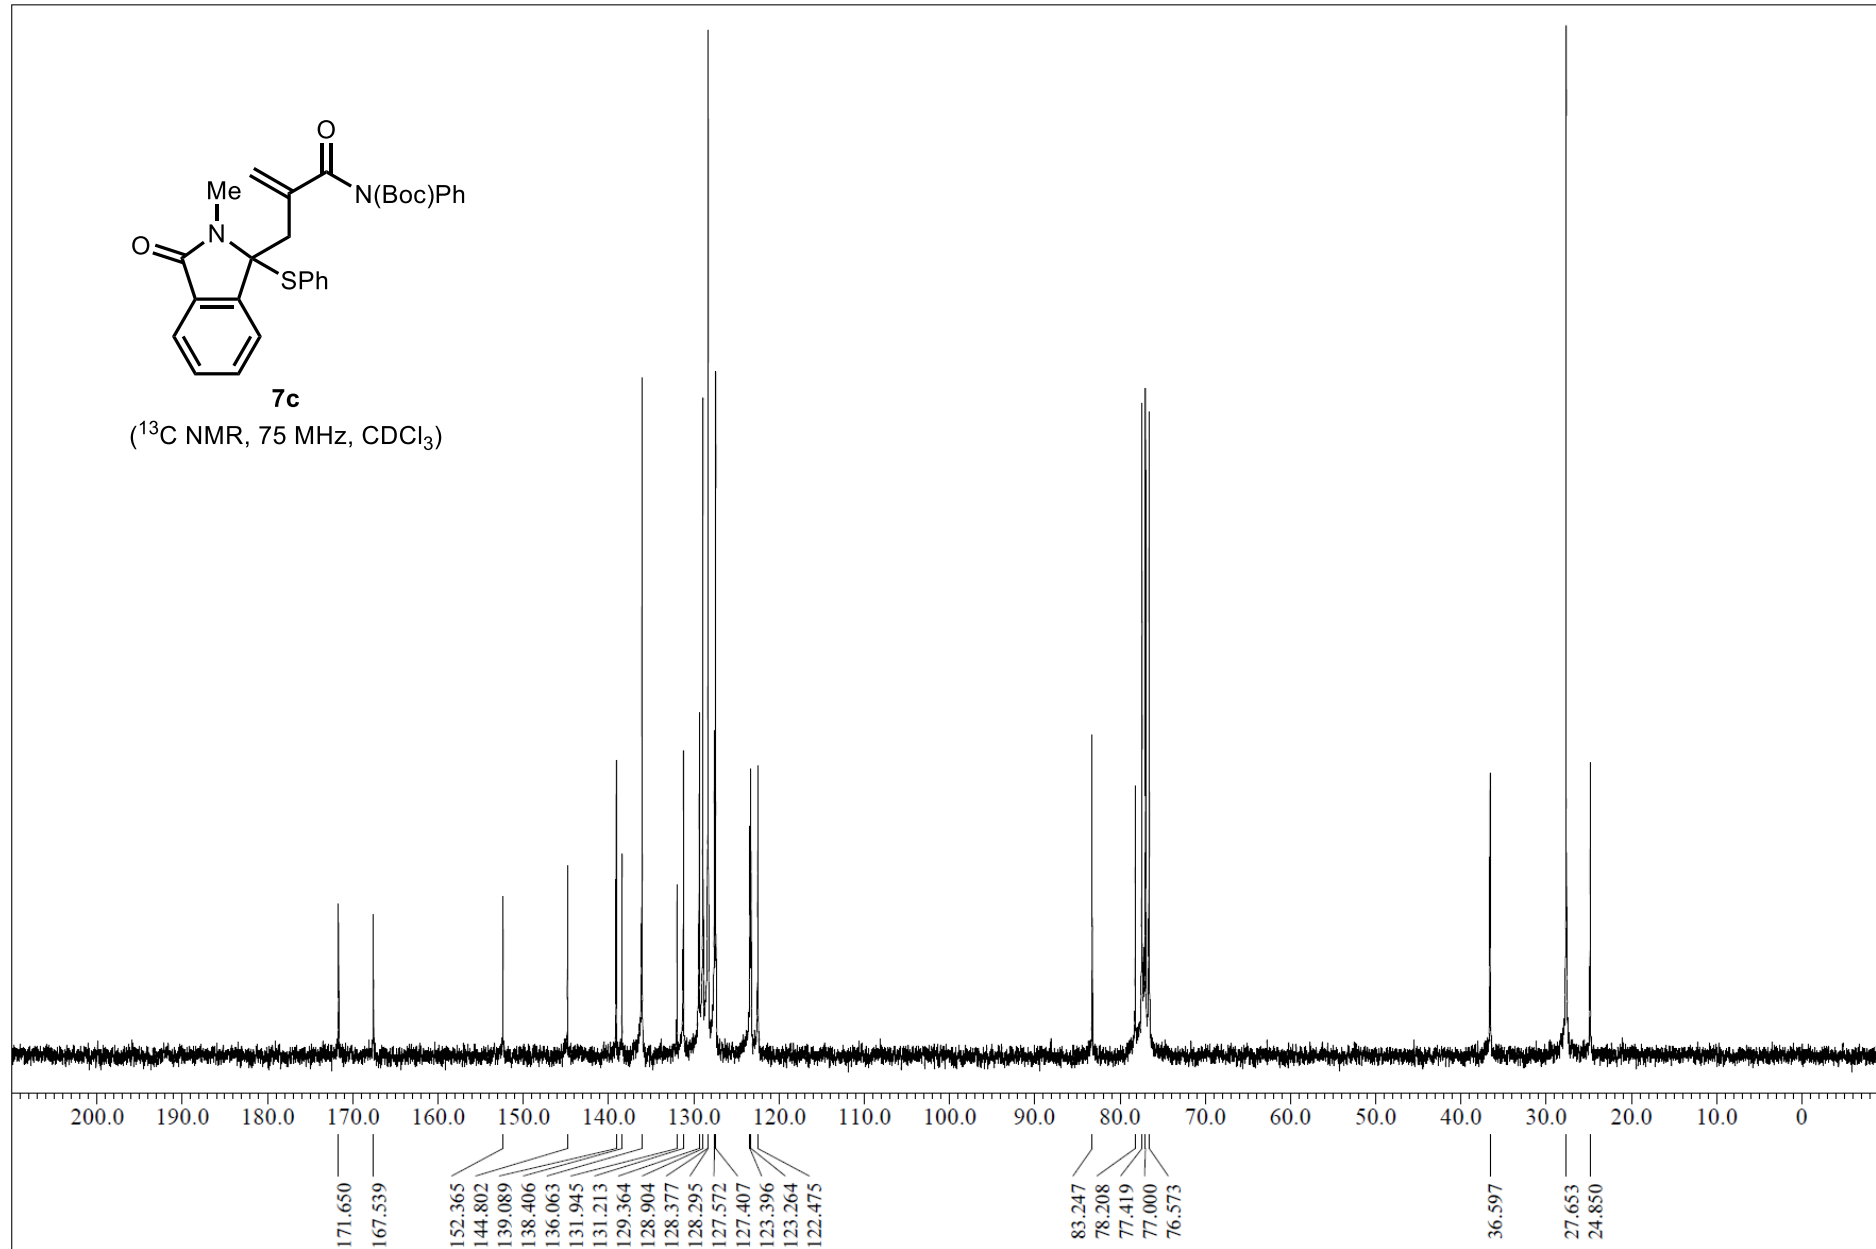

X : parts per Million :  $^{13}\text{C}$



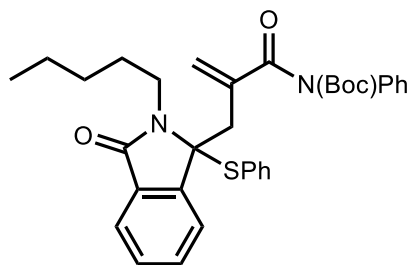

**7d**

( $^1\text{H}$  NMR, 300 MHz,  $\text{CDCl}_3$ )

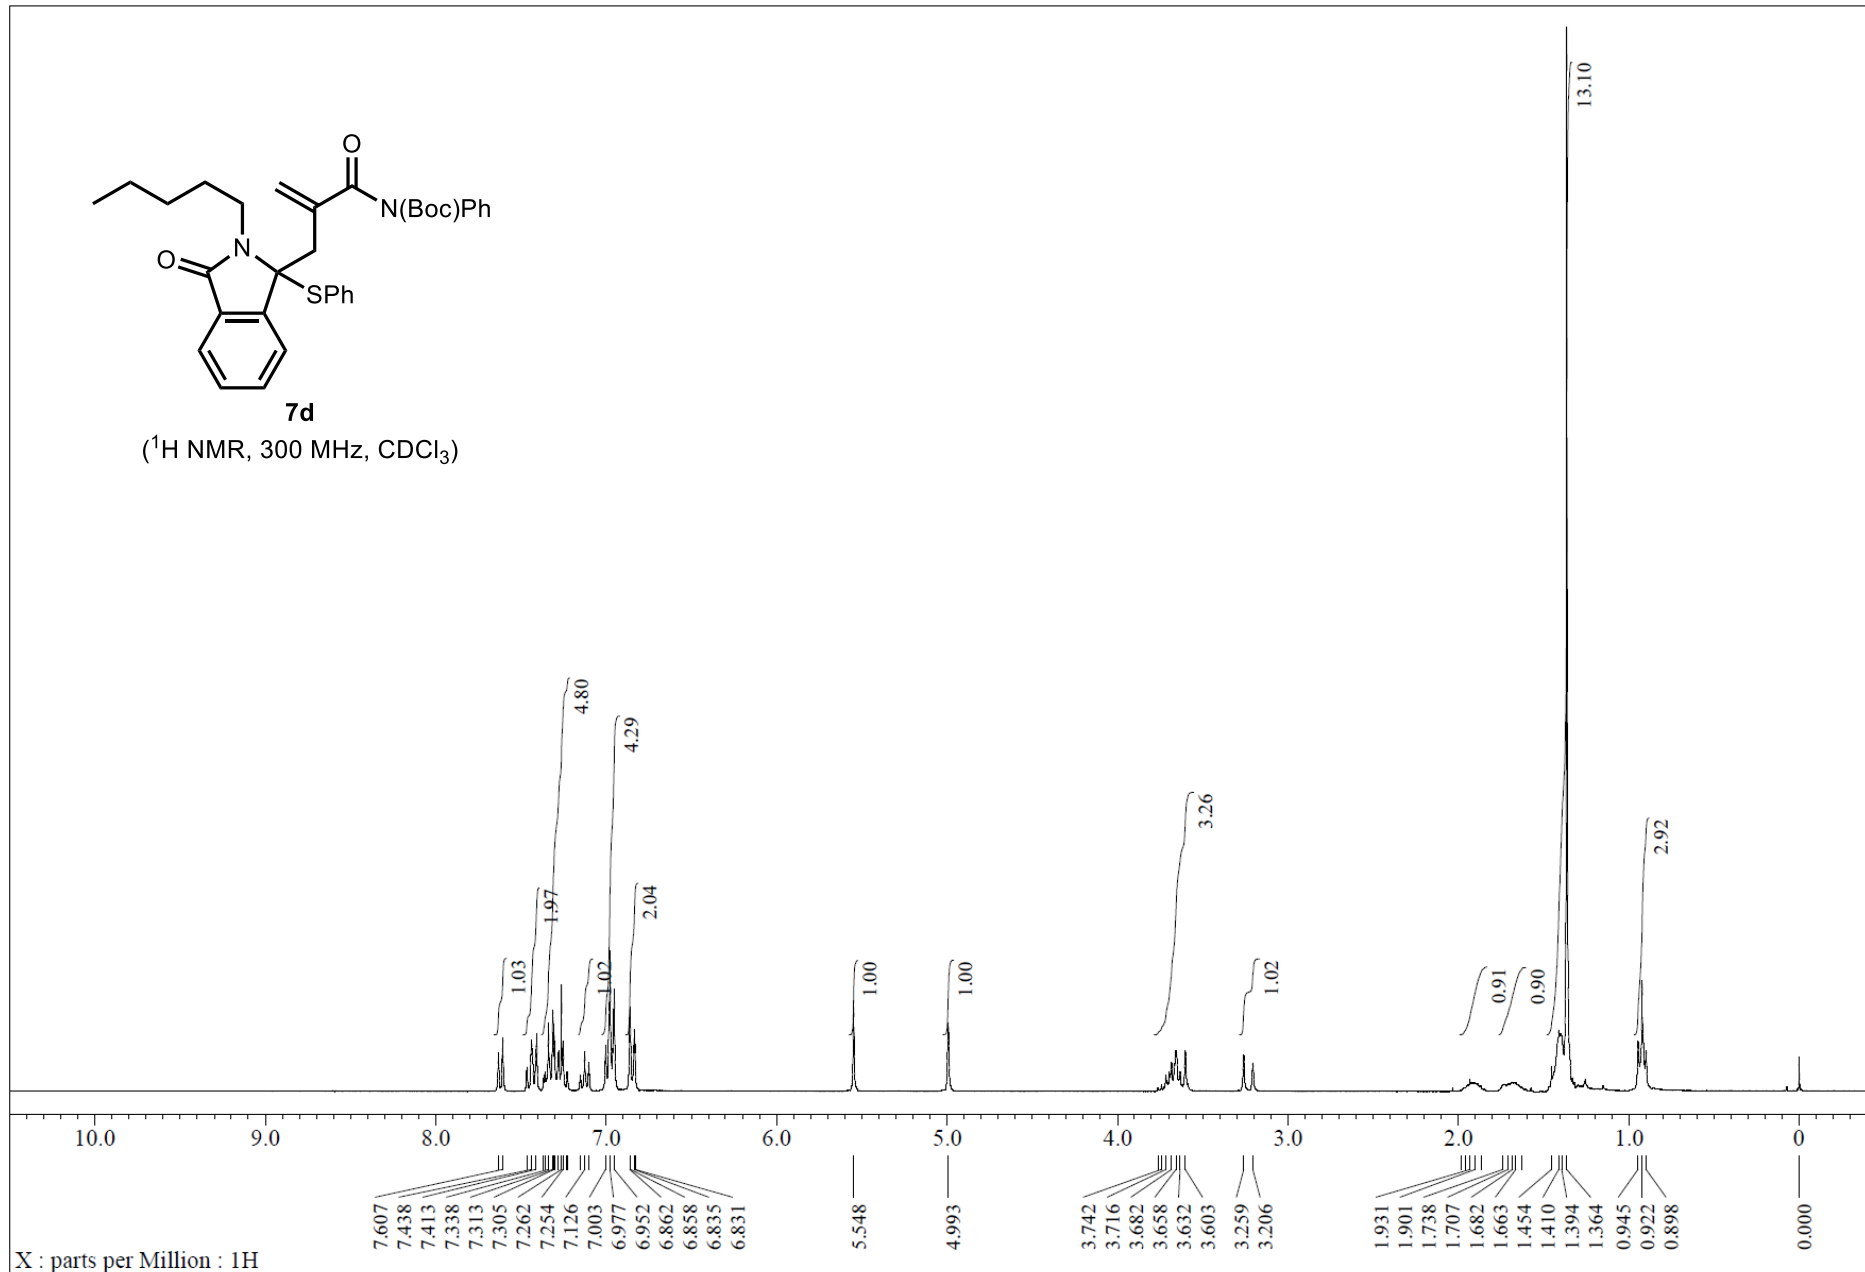

X : parts per Million :  $^1\text{H}$

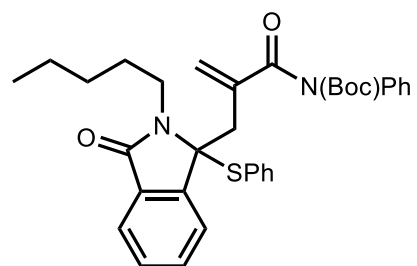

**7d**

( $^{13}\text{C}$  NMR, 75 MHz,  $\text{CDCl}_3$ )

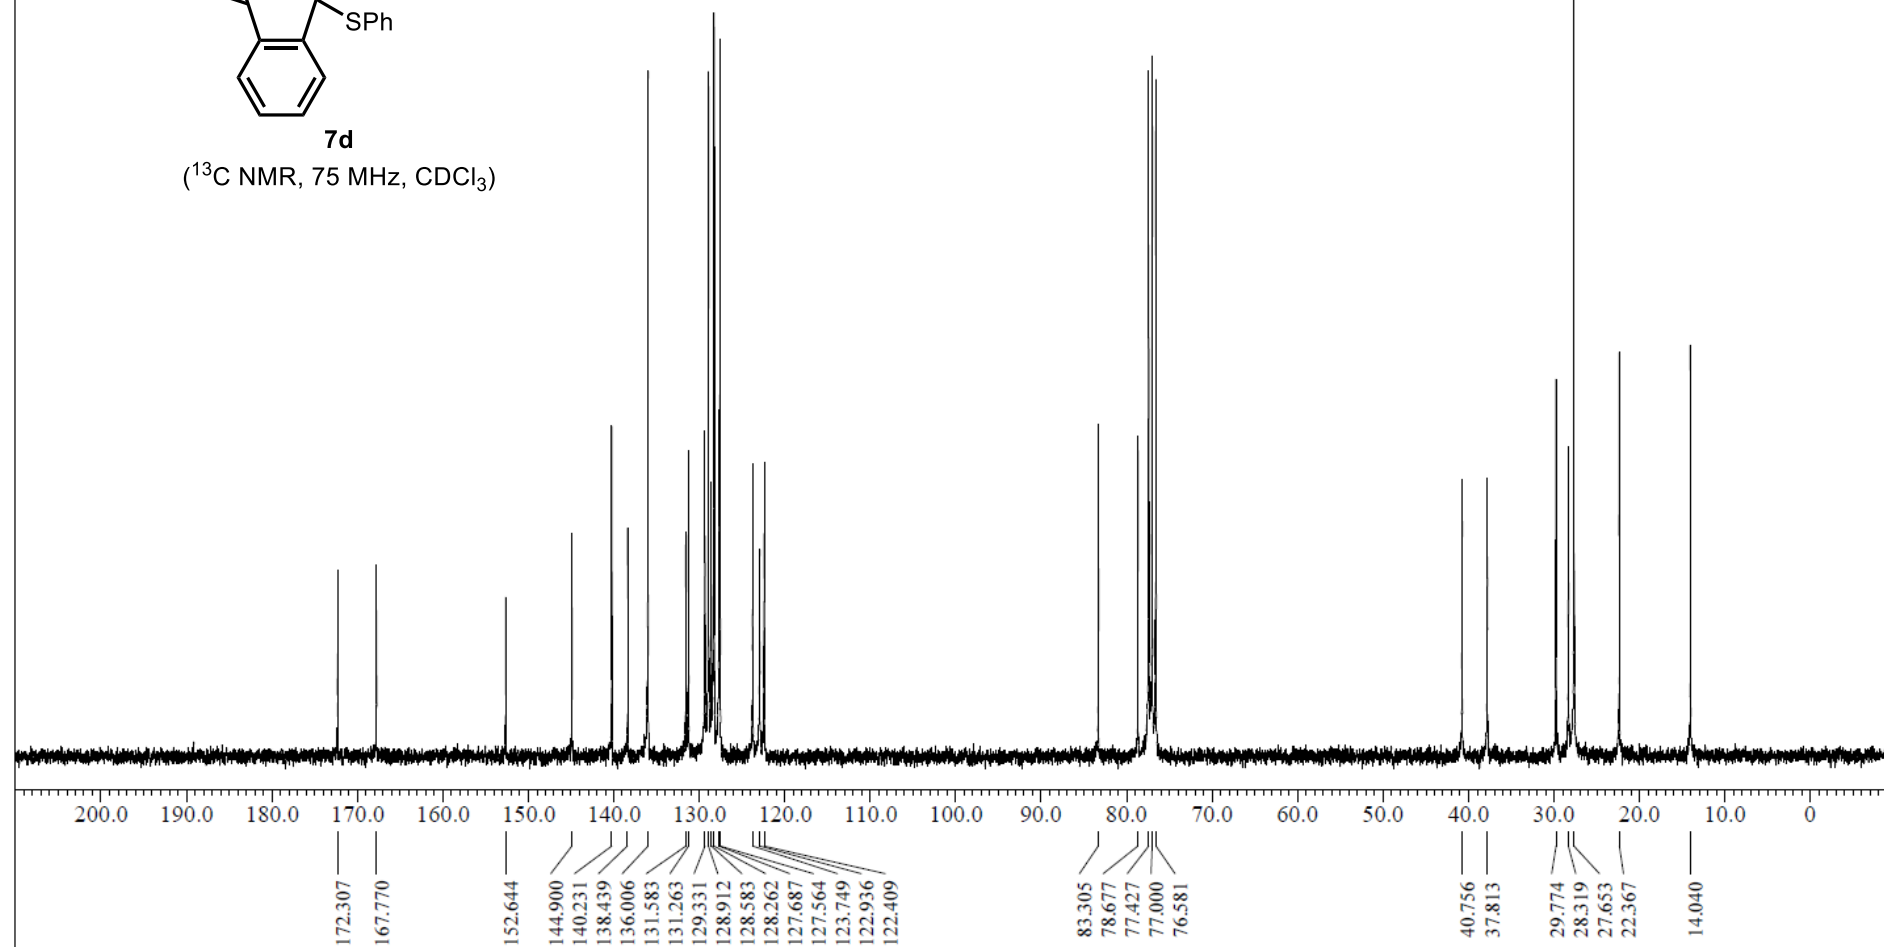

X : parts per Million :  $^{13}\text{C}$

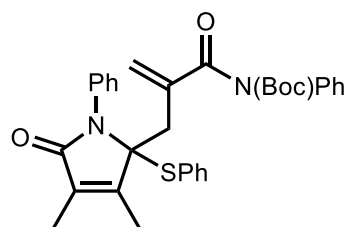

**7e**  
( $^1\text{H}$  NMR, 300 MHz,  $\text{CDCl}_3$ )

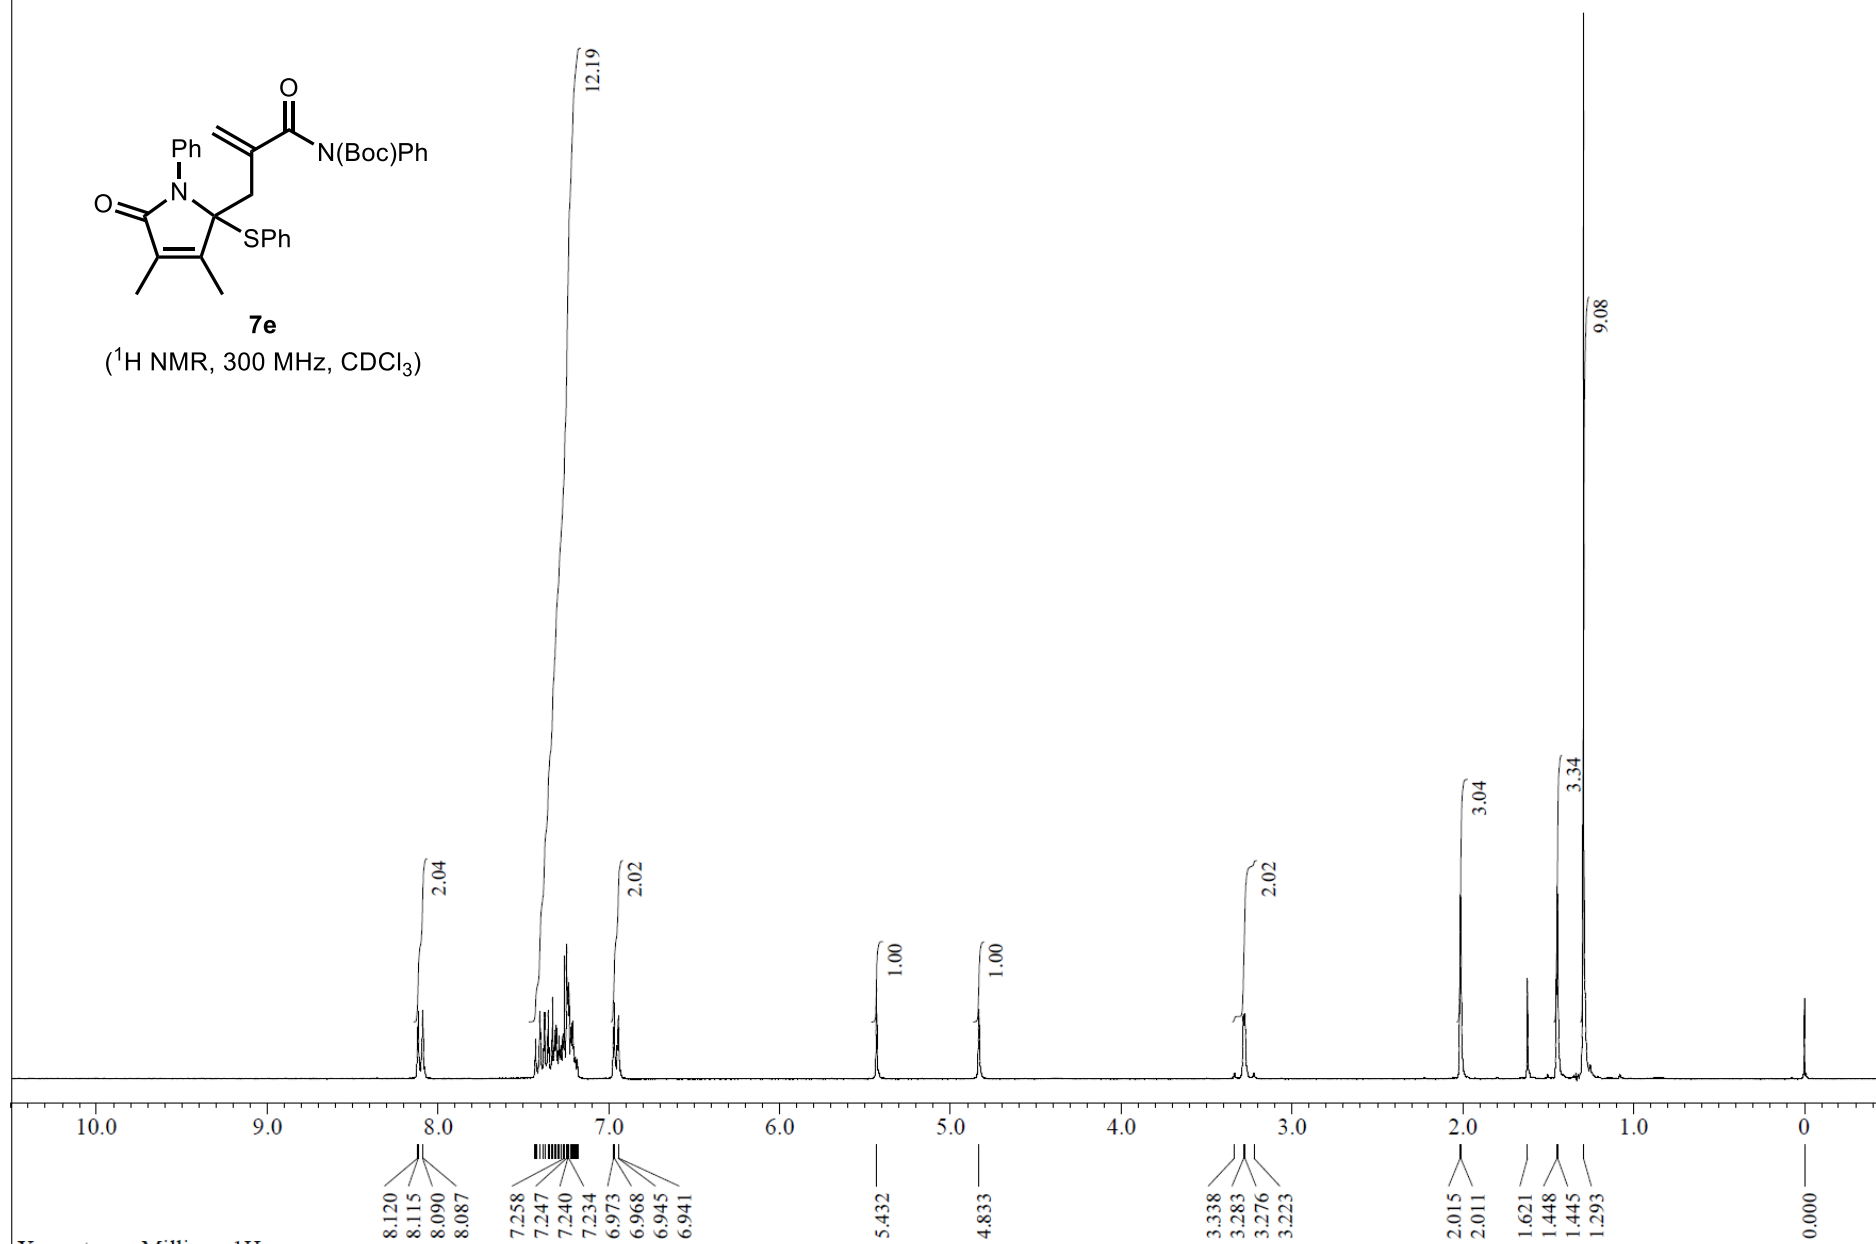

X : parts per Million :  $^1\text{H}$

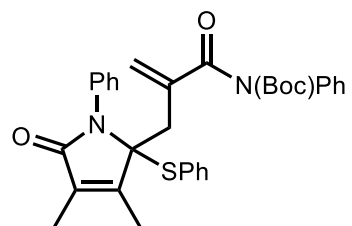

**7e**

( $^{13}\text{C}$  NMR, 75 MHz,  $\text{CDCl}_3$ )

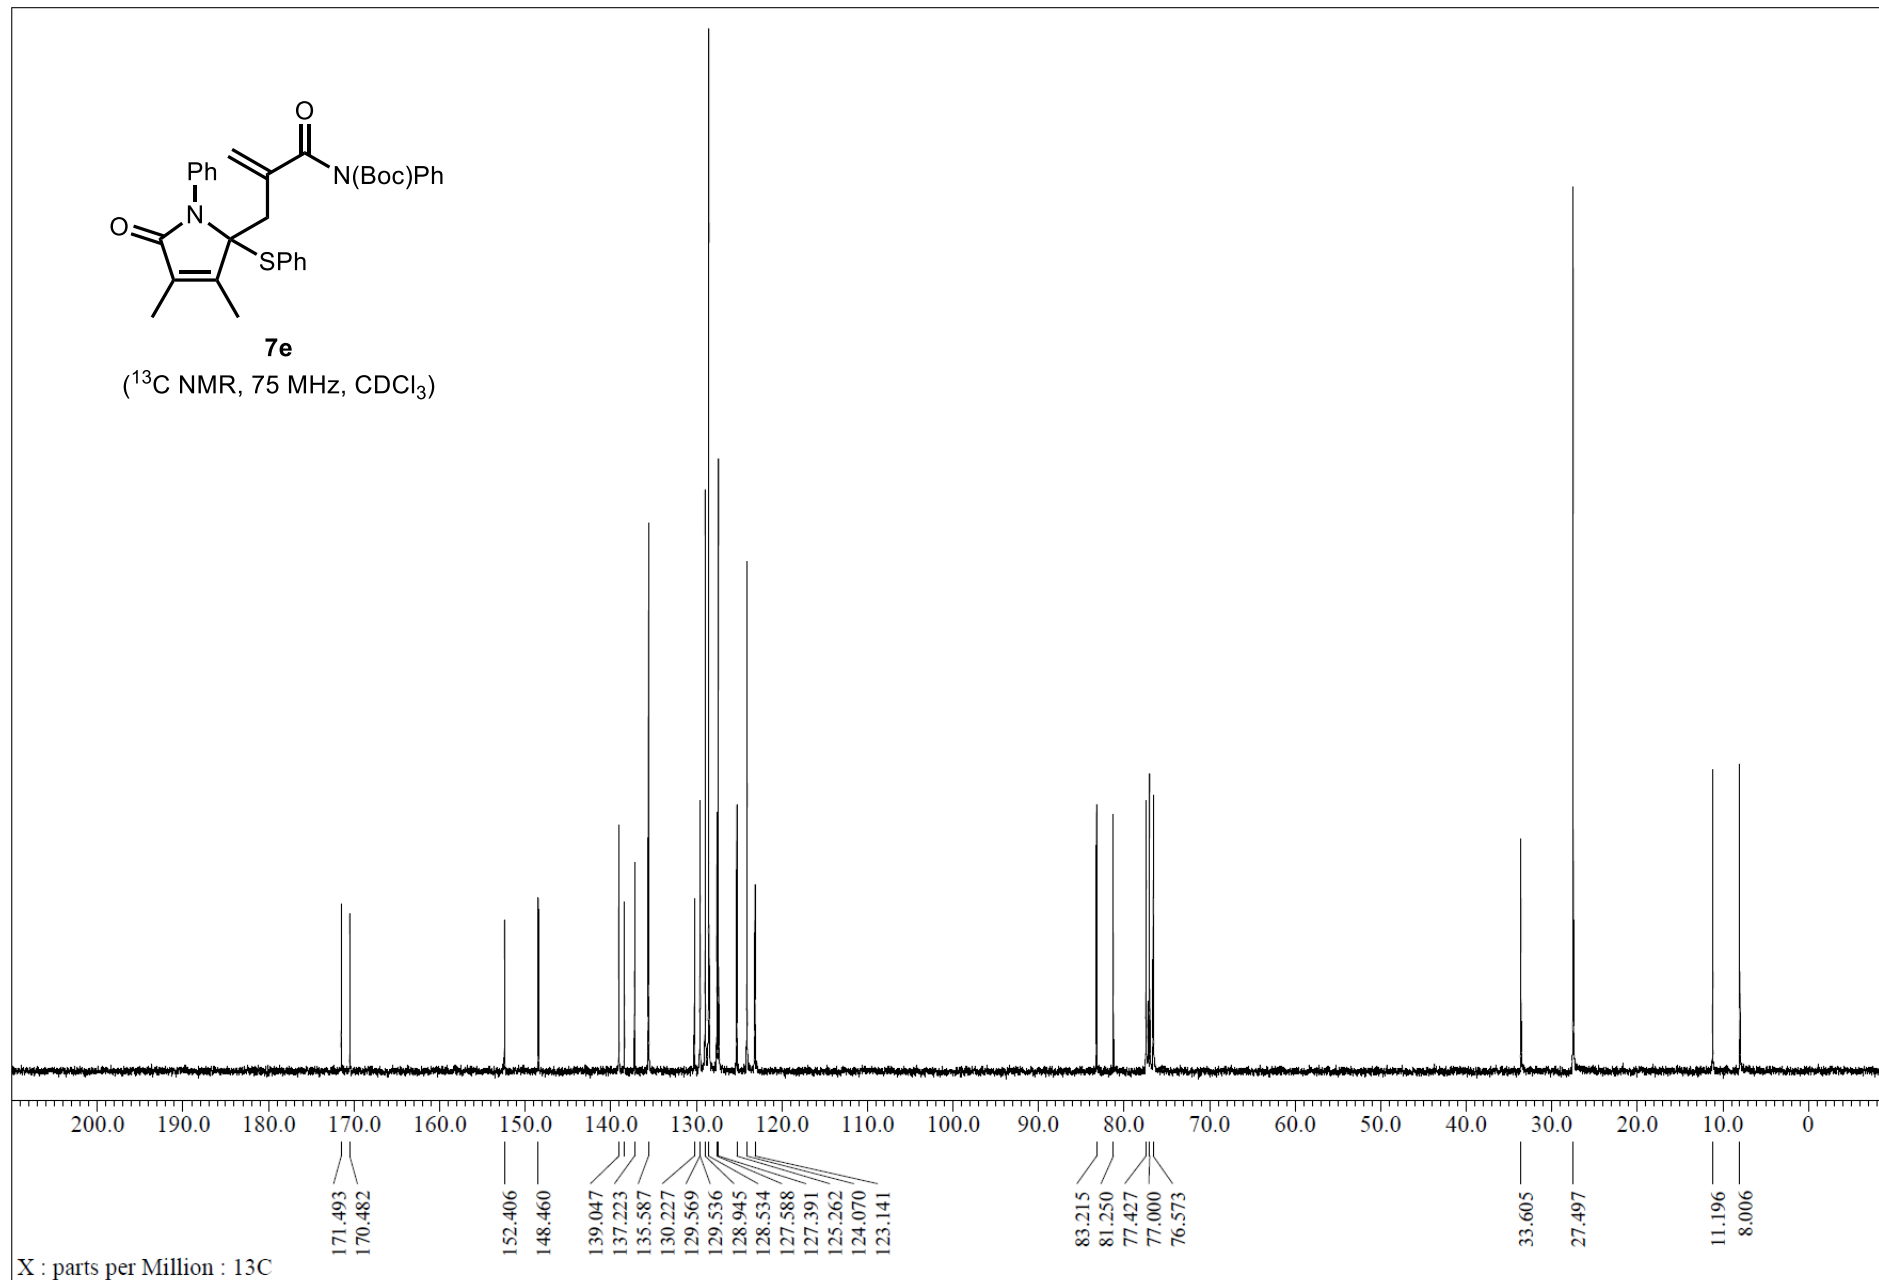

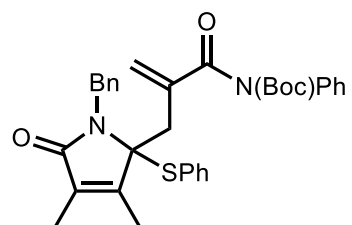

**7f**

(<sup>1</sup>H NMR, 300 MHz, CDCl<sub>3</sub>)

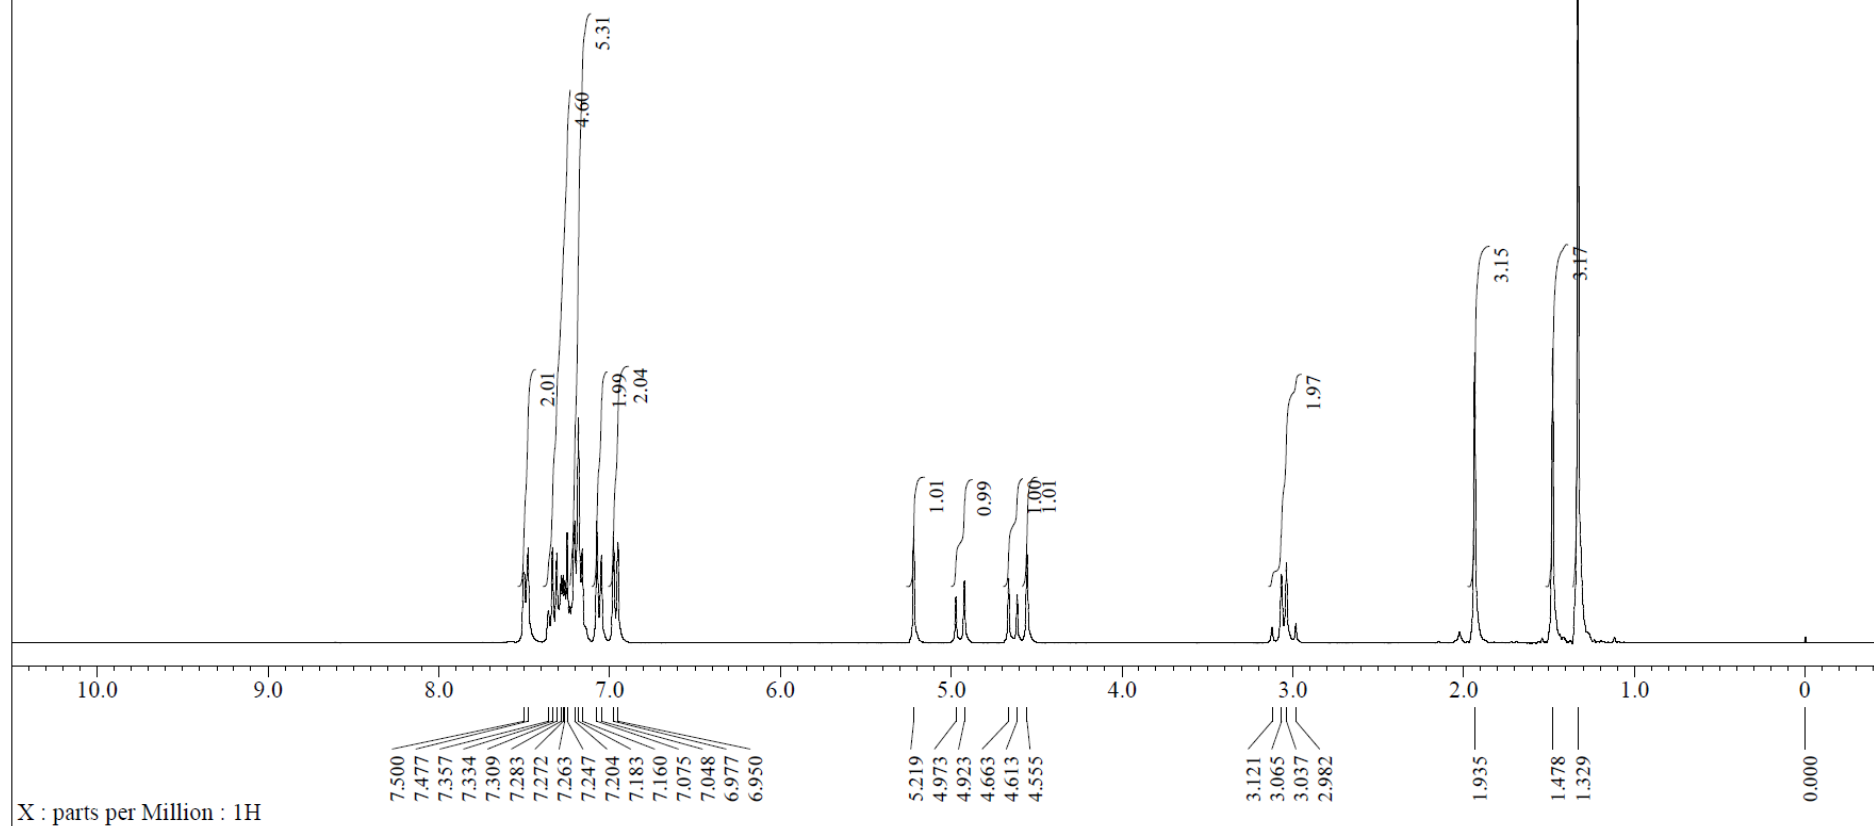

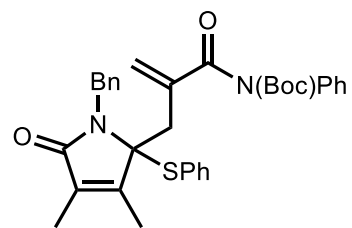

**7f**

( $^{13}\text{C}$  NMR, 75 MHz,  $\text{CDCl}_3$ )

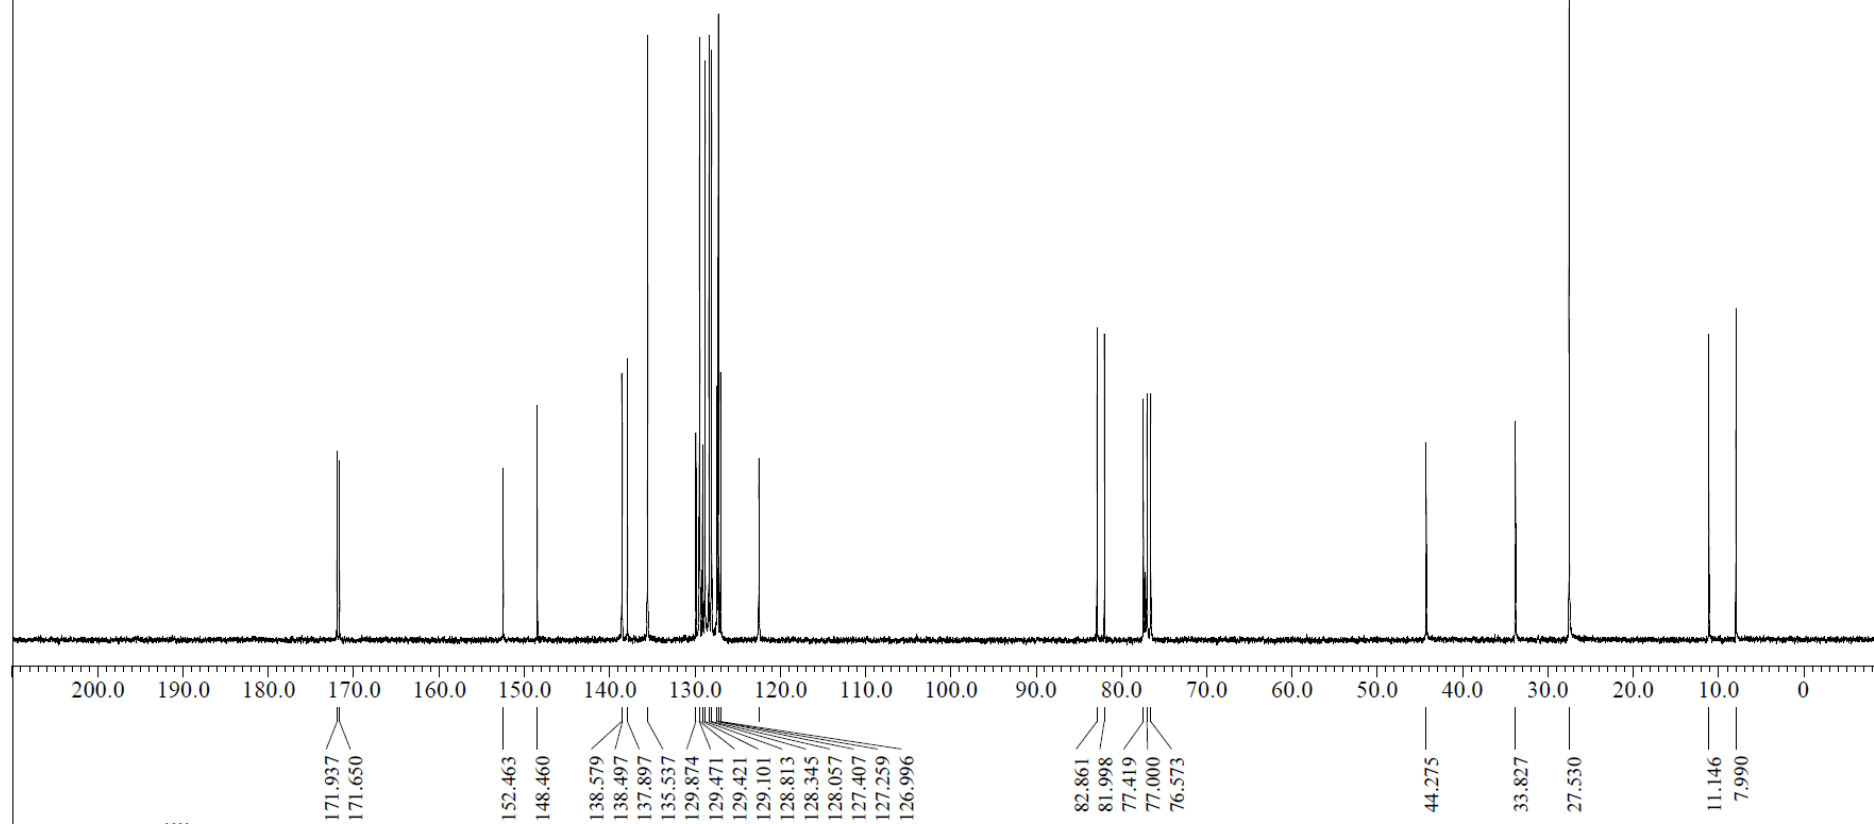

X : parts per Million :  $^{13}\text{C}$

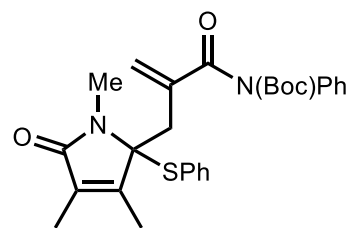

**7g**

( $^1\text{H}$  NMR, 300 MHz,  $\text{CDCl}_3$ )

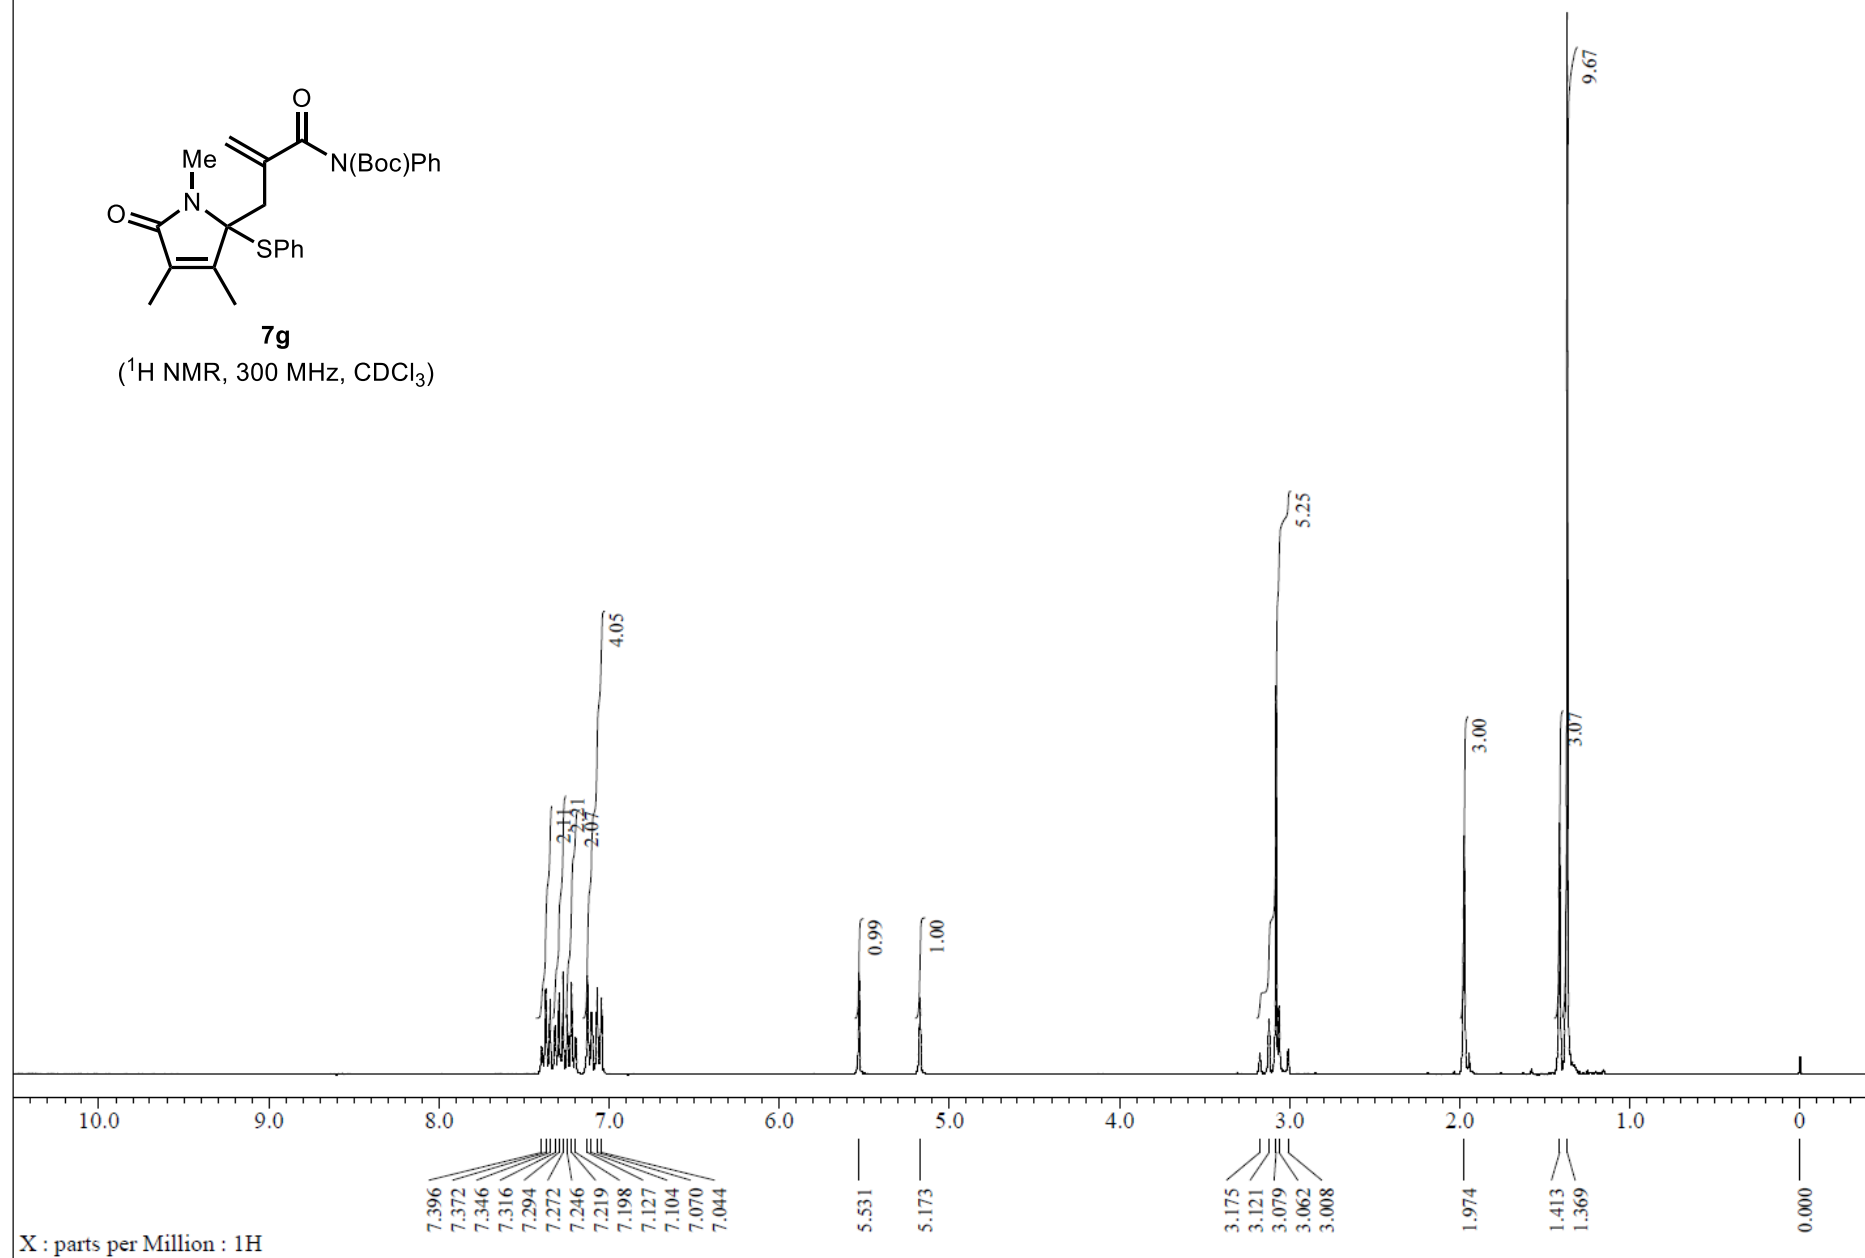

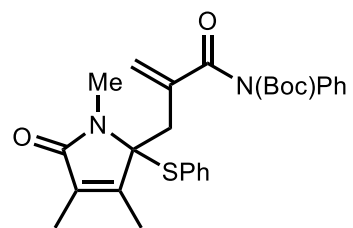

**7g**

( $^{13}\text{C}$  NMR, 75 MHz,  $\text{CDCl}_3$ )

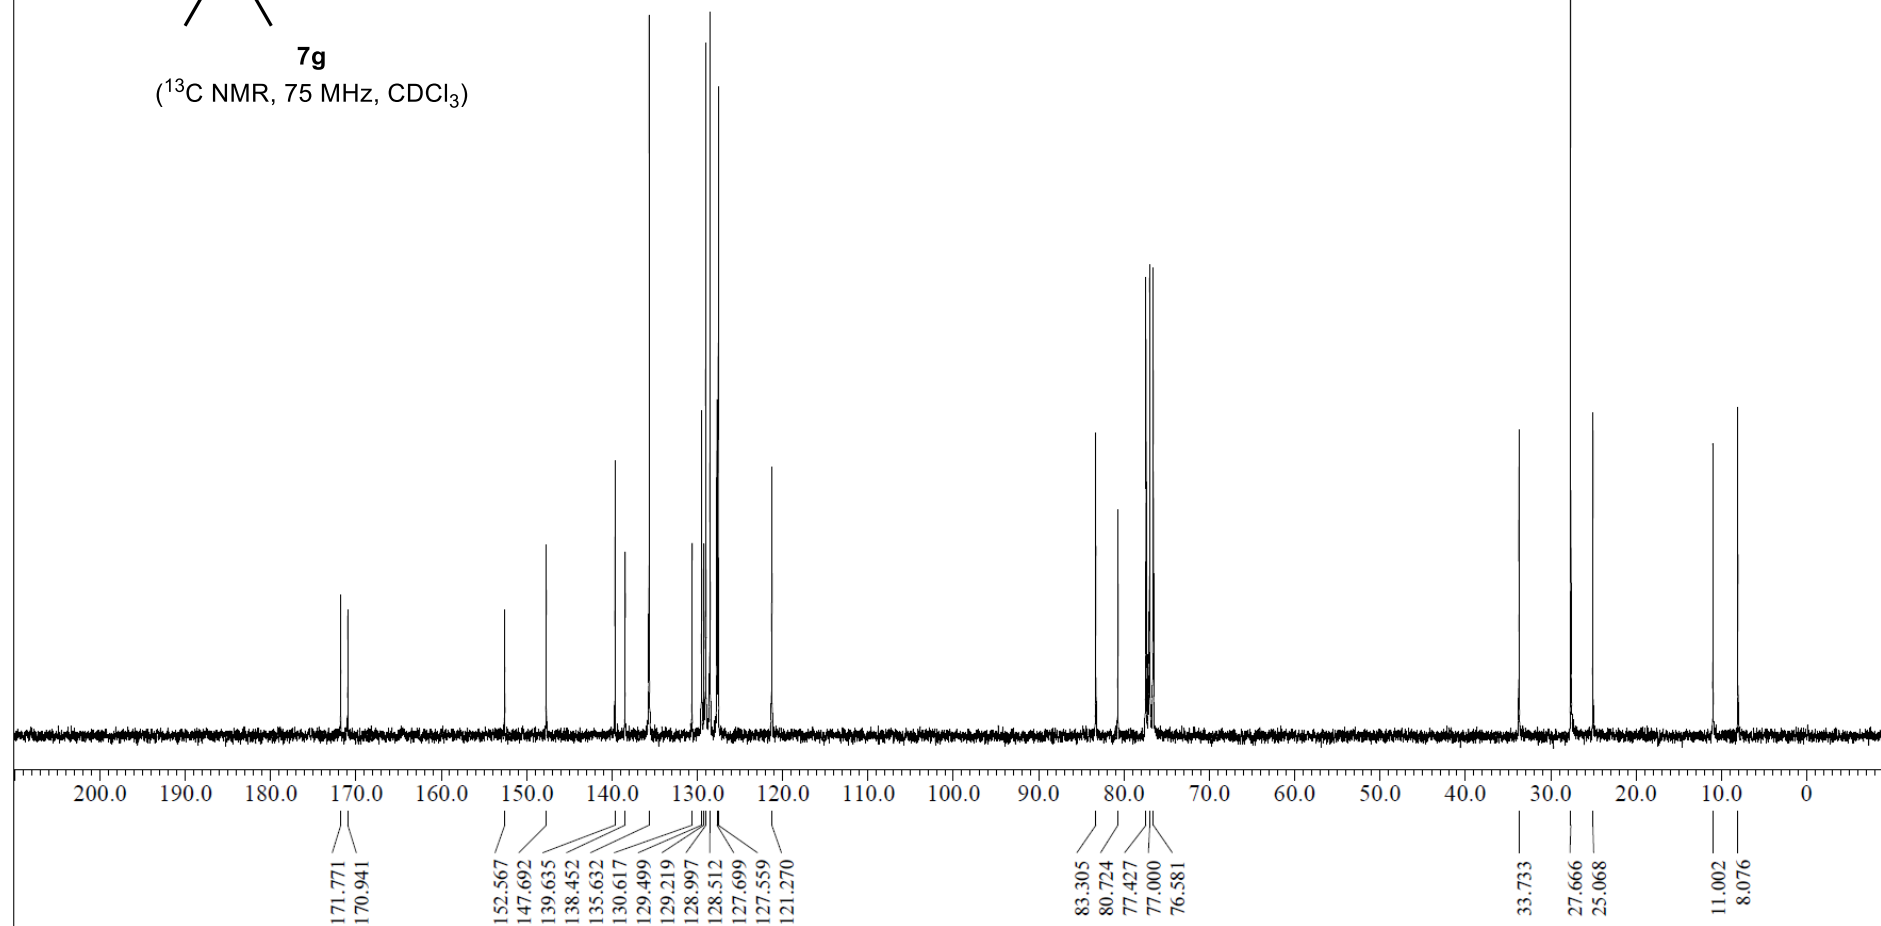

X : parts per Million :  $^{13}\text{C}$



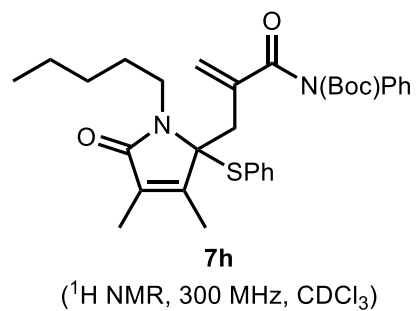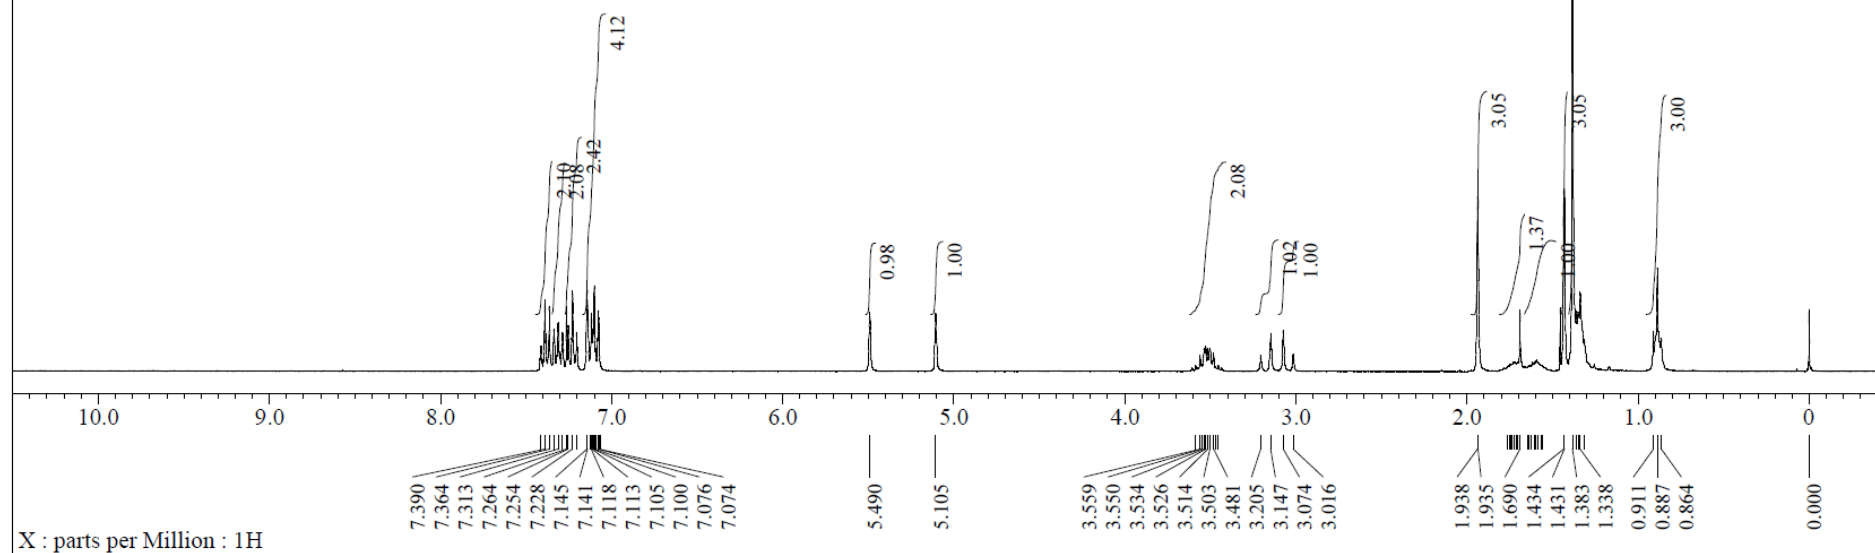

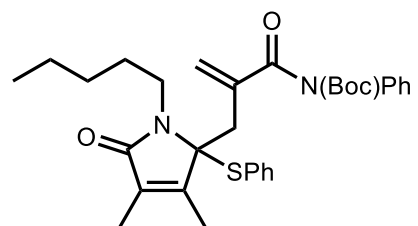

**7h**

( $^{13}\text{C}$  NMR, 75 MHz,  $\text{CDCl}_3$ )

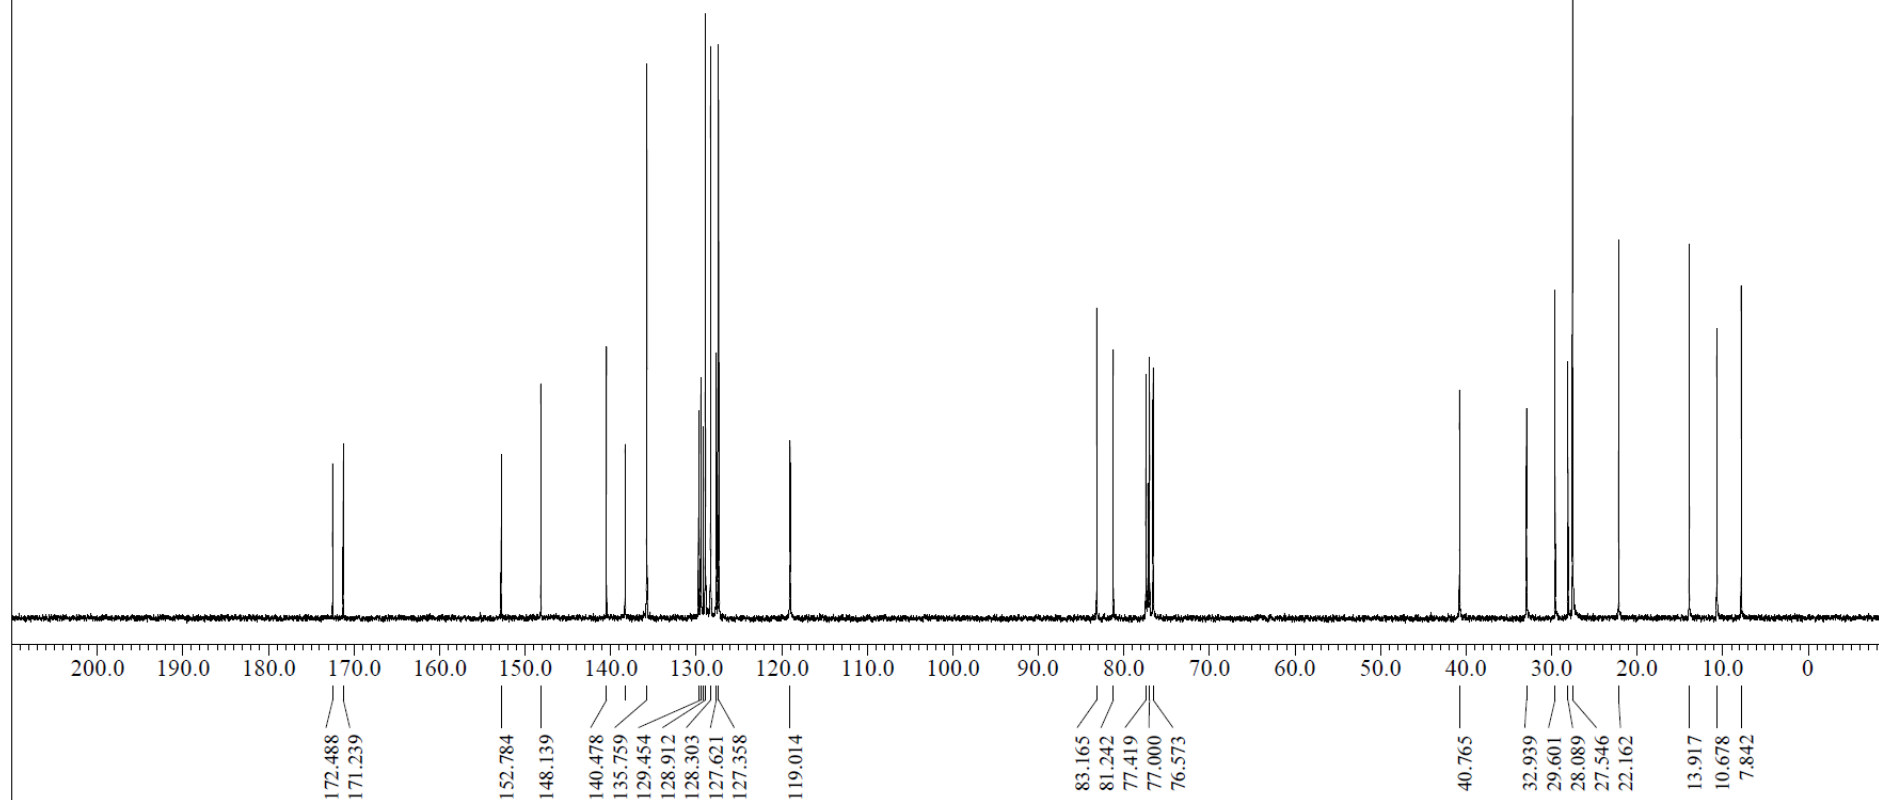

X : parts per Million :  $^{13}\text{C}$
